# Supplementary material for: Photo-mediated radical relay oximinosulfonamidation of alkenes with N-nitrosamines triggered by DABSO
Source: Royal Society of Chemistry journal article supplement (doi:10.1039/d4gc01976h), 2024-01-01
Supplement: d4gc01976h1.pdf [file d4gc01976h1.pdf]

Electronic Supporting Information:

## **Photo-Mediated Radical Relay Oximinosulfonamidation of Alkenes with *N*-Nitrosamines Triggered by DABSO**

Ji-Wei Sang,<sup>[a,b]</sup> Hong Chen,<sup>[a]</sup> Yu Zhang,<sup>[c]\*</sup> Jinxin Wang,<sup>[a]\*</sup> Wei-Dong Zhang<sup>[a,b,c,d]\*</sup>

[a] Department of Phytochemistry, School of Pharmacy, Second Military Medical University, Shanghai 200433, P. R. China.

[b] State Key Laboratory of Antiviral Drugs, Pingyuan Laboratory, NMPA Key Laboratory for Research and Evaluation of Innovative Drug, Henan Normal University, Henan 453007, P. R. China.

[c] Shanghai Frontiers Science Center for Chinese Medicine Chemical Biology, Institute of Interdisciplinary Integrative Medicine Research, Shanghai University of Traditional Chinese Medicine, Shanghai 201203, P. R. China.

[d] Institute of Medicinal Plant Development, Chinese Academy of Medical Sciences & Peking Union Medical College, Beijing 100193, P. R. China.

## Contents

|                                                          |             |
|----------------------------------------------------------|-------------|
| <b>1. General information.</b> .....                     | <b>S3</b>   |
| <b>2. Synthesis of starting materials.</b> .....         | <b>S4</b>   |
| <b>3. General procedure for coupling reaction.</b> ..... | <b>S5</b>   |
| <b>4. Synthetic applications.</b> .....                  | <b>S8</b>   |
| <b>5. Mechanistic investigations.</b> .....              | <b>S12</b>  |
| <b>6. Optimization of the reaction conditions.</b> ..... | <b>S21</b>  |
| <b>7. The X-ray crystallographic data.</b> .....         | <b>S22</b>  |
| <b>8. Characterization data of new compounds.</b> .....  | <b>S24</b>  |
| <b>9. NMR spectra data.</b> .....                        | <b>S58</b>  |
| <b>10. Reference.</b> .....                              | <b>S172</b> |

## 1. General information.

Commercial reagents were used without purification and reactions were carried out under argon atmosphere with exclusion of moisture from reagents using standard techniques for manipulating air-sensitive compounds. Organic solutions were concentrated under reduced pressure on a Büchi rotary evaporator using a water bath. Visualization of the developed chromatogram was performed by UV light or aqueous  $\text{KMnO}_4$  stain. NMR-spectra were recorded on DRX-500 (500 MHz) spectrometer and calibrated by using residual undeuterated chloroform ( $\delta = 7.26$  ppm for  $^1\text{H}$ , 77.16 ppm for  $^{13}\text{C}$ ),  $\text{DMSO-}d_6$  ( $\delta = 2.50$  ppm for  $^1\text{H}$ , 39.52 ppm for  $^{13}\text{C}$ ),  $\text{CD}_3\text{OD}$  ( $\delta = 3.31$  ppm for  $^1\text{H}$ , 49.00 ppm for  $^{13}\text{C}$ ) and  $\text{CD}_3\text{CN}$  ( $\delta = 1.94$  ppm for  $^1\text{H}$ , 1.32 and 118.26 ppm for  $^{13}\text{C}$ ) as internal references. Data for  $^1\text{H}$  NMR are reported as follows: chemical shift ( $\delta$  ppm), multiplicity (s = singlet, d = doublet, t = triplet, q = quartet, m = multiplet, dd = doublet of doublets, td = triplet of doublets, brs = broad singlet), coupling constant (Hz), and integration. High resolution mass spectra were obtained from the Agilent MSD-Trap-XCT. Kessil lamps were purchased from Tansoole, with precise wavelengths (390 nm). Single crystal X-ray crystallography data was obtained on Bruker D8 venture. Ultraviolet-visible absorption experiments were performed using a METASH UV-8000S (T) spectrophotometer. Thin-layer chromatography (TLC) was performed on 0.25 mm silica gel F-254 plates (Yantai Jiangyou).

## 2. Synthesis of starting materials.

### 2.1. Synthesis of *N*-nitrosamines.<sup>[1]</sup>

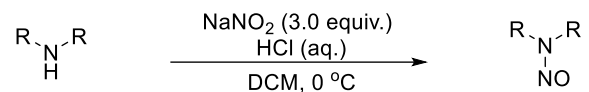

Secondary amine (10 mmol, 1.0 equiv.) and sodium nitrite (2.1 g, 30 mmol, 3.0 equiv.) were dissolved in DCM (50 mL, 0.2 M) at 0 °C in an ice bath, and concentrated hydrochloric acid was slowly added dropwise to this solution until the pH was adjusted to 1–2. The solution was stirred at 0 °C until the reaction was complete as indicated by TLC, and then quenched by adding water (100 mL). The crude mixture was extracted with EtOAc (50 mL × 3), and the combined organic layers were washed with saturated NaCl solution, dried over anhydrous Na<sub>2</sub>SO<sub>4</sub>, and concentrated under vacuum using a rotary evaporator. The resulting residue was purified by flash column chromatography using PE/EtOAc system (PE/EtOAc, 10/1–3/1, v/v).

### 3. General procedure for coupling reaction.

#### 3.1. Procedure A:

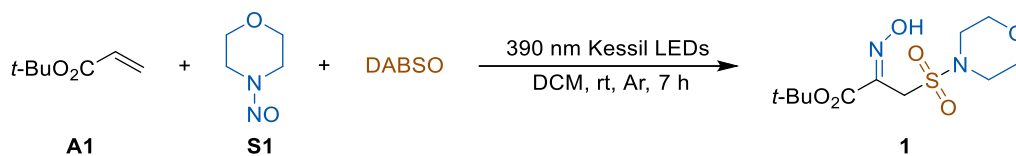

The reaction was conducted in an oven-dried 3-mL vial equipped with a stir bar. **A1** (25.7 mg, 0.2 mmol), **S1** (35.0 mg, 0.3 mmol, 1.5 equiv.) and DABSO (96.2 mg, 0.4 mmol, 2.0 equiv.) were sequentially added in DCM (2 mL) under argon atmosphere. The mixture was stirred at room temperature with cooling fans under irradiation of 40 W 390 nm LED lamps (Kessil KSPR160–390 LED Grow Light; 5-6 cm away). Upon completion, the reaction mixture was filtered and subsequently concentrated under vacuum using a rotary evaporator. The resulting residue was then purified by flash column chromatography using PE/EtOAc system (PE/EtOAc, 1/1, v/v) to afford product **1** as a white powder (44.4 mg, 72% yield). Unless otherwise noted, **1–49** were synthesized under the same reaction conditions.

### 3.2. Gram-scale synthesis of **12**.

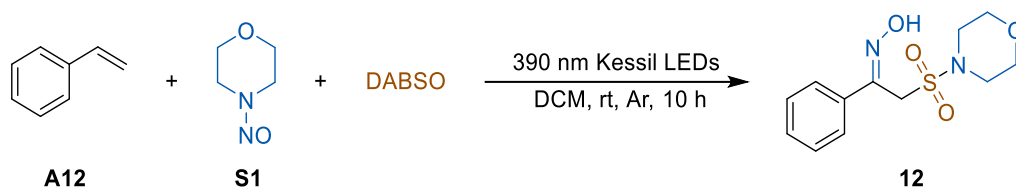

The reaction was performed in an oven-dried 250-mL schlenk tube equipped with a stir bar. **A12** (520.3 mg, 5.0 mmol), **S1** (870.5 mg, 7.5 mmol, 1.5 equiv.) and DABSO (2.41 g, 10.0 mmol, 2.0 equiv.) were sequentially added in DCM (50 mL) under argon atmosphere. The mixture was stirred at room temperature with cooling fans under irradiation of four sets of 40 W 390 nm LED lamps (Kessil KSPR160–390 LED Grow Light; 8–10 cm away). The mixture until the starting materials were consumed as indicated by TLC analysis. Upon completion, the reaction mixture was filtered and subsequently concentrated under vacuum using a rotary evaporator. The resulting residue was then purified by flash column chromatography using PE/EtOAc system (PE/EtOAc, 2/1, v/v) to afford product **1** as a white solid (1.24 g, 87% yield).

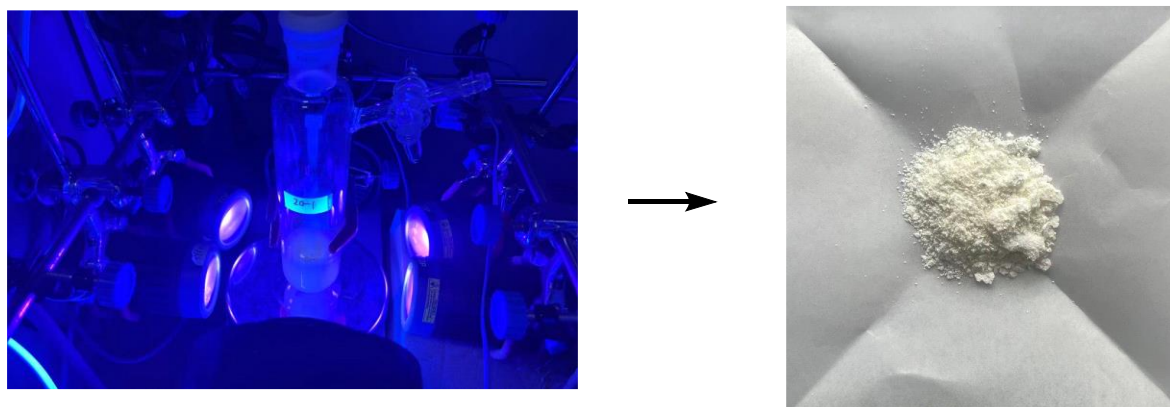

**Figure S1.** Gram-scale reaction set-up.

### 3.3. Gram-scale synthesis of 30.

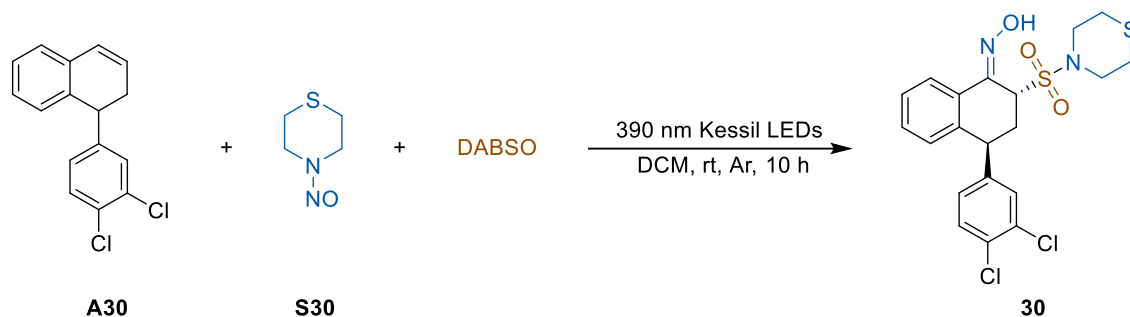

The reaction was performed in an oven-dried 250-mL schlenk tube equipped with a stir bar. **A30** (1.1 g, 4.0 mmol), **S30** (792.2 mg, 6.0 mmol, 1.5 equiv.) and DABSO (1.93 g, 8.0 mmol, 2.0 equiv.) were sequentially added in DCM (40 mL) under argon atmosphere. The mixture was stirred at room temperature with cooling fans under irradiation of four sets of 40 W 390 nm LED lamps (Kessil KSPR160–390 LED Grow Light; 8–10 cm away). The mixture until the starting materials were consumed as indicated by TLC analysis. Upon completion, the reaction mixture was filtered and subsequently concentrated under vacuum using a rotary evaporator. The resulting residue was then purified by flash column chromatography using PE/EtOAc system (PE/EtOAc, 2/1, v/v) to afford product **30** as a yellowish powder (1.32 g, 70% yield).

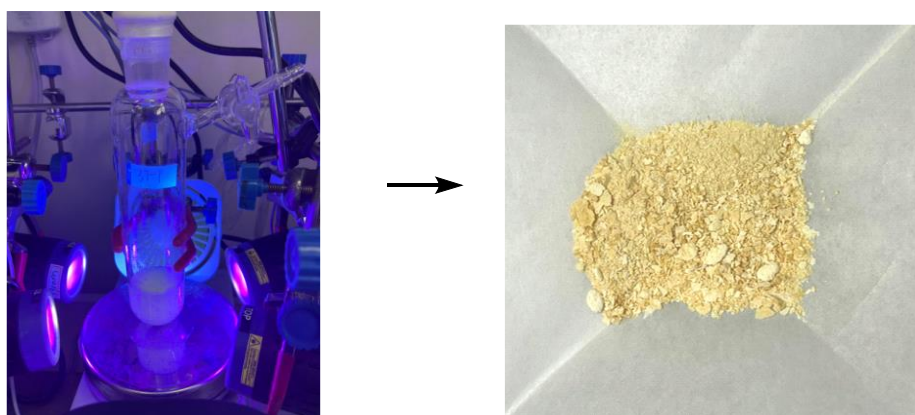

**Figure S2.** Gram-scale reaction set-up.

## 4. Synthetic applications.

### 4.1. Follow-up chemistry.

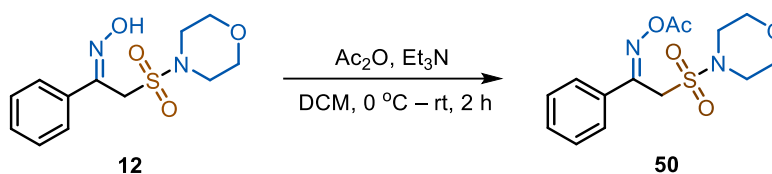

Acetic anhydride (28.2  $\mu\text{L}$ , 0.3 mmol) was slowly added to a solution of **12** (56.8 mg, 0.2 mmol) and triethylamine (55.6  $\mu\text{L}$ , 0.4 mmol) in DCM (2 mL) under argon atmosphere at 0 °C. The reaction was stirred for 2 h, and then quenched by adding saturated  $\text{NaHCO}_3$  solution (5 mL). The crude mixture was extracted with EtOAc (5 mL  $\times$  3), and the combined organic layers were washed with saturated NaCl solution, dried over anhydrous  $\text{Na}_2\text{SO}_4$ , and concentrated under vacuum using a rotary evaporator. The resulting residue was then purified by flash column chromatography using a PE/EtOAc system (PE/EtOAc, 2/1, v/v) to afford product **50** as a white powder (62.0 mg, 95% yield,  $Z/E = 7.7:1$ ).

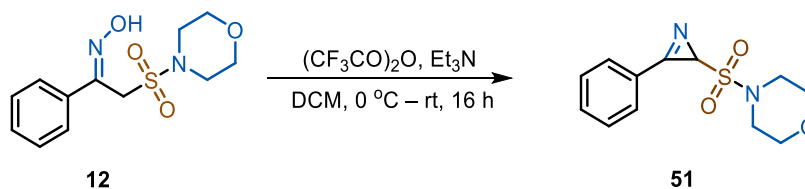

Trifluoroacetic anhydride (69.5  $\mu\text{L}$ , 0.5 mmol) and triethylamine (111.2  $\mu\text{L}$ , 0.8 mmol) were slowly added to a solution of **12** (56.8 mg, 0.2 mmol) in DCM (2 mL) under argon atmosphere at 0 °C. The reaction was stirred at for 16 h at room temperature, and then quenched by adding saturated  $\text{NaHCO}_3$  solution (5 mL). The crude mixture was extracted with EtOAc (5 mL  $\times$  3), and the combined organic layers were washed with saturated NaCl solution, dried over anhydrous  $\text{Na}_2\text{SO}_4$ , and concentrated under vacuum using a rotary evaporator. The resulting residue was then purified by flash column chromatography using a PE/EtOAc system (PE/EtOAc, 3/1, v/v) to afford product **51** as white powder (32.0 mg, 60% yield).



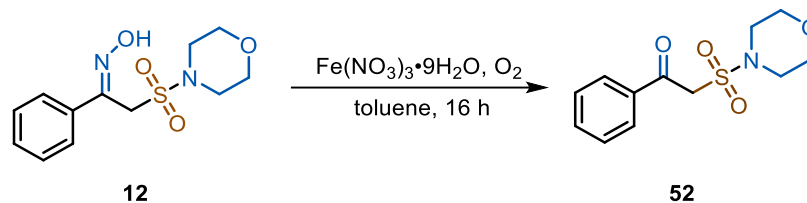

$\text{Fe}(\text{NO}_3)_3 \cdot 9\text{H}_2\text{O}$  (121.2 mg, 0.3 mmol) was added to a solution of **12** (56.8 mg, 0.2 mmol) in toluene (2 mL) under oxygen atmosphere, The reaction was stirred at for 16 h, and then quenched by adding water (5 mL). The crude mixture was extracted with EtOAc (5 mL  $\times$  3), and the combined organic layers were washed with saturated NaCl solution, dried over anhydrous  $\text{Na}_2\text{SO}_4$ , and concentrated under vacuum using a rotary evaporator. The resulting residue was then purified by flash column chromatography using a PE/EtOAc system (PE/EtOAc, 3/1, v/v) to afford product **52** as a white powder (33.9 mg, 63% yield).<sup>[2]</sup>

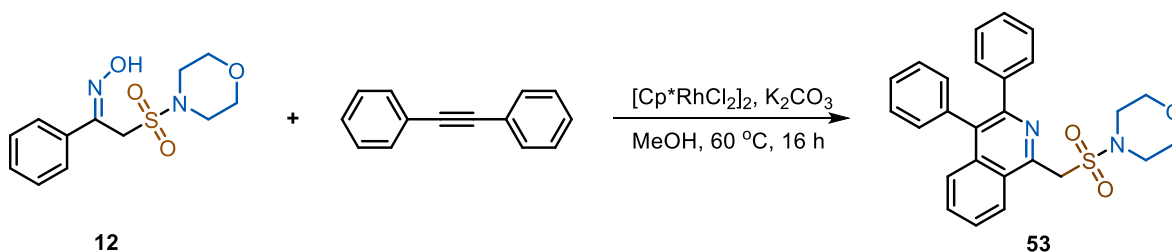

Diphenylacetylene (39 mg, 0.22 mmol, 1.1 equiv.),  $[\text{Cp}^*\text{RhCl}_2]_2$  (2.5 mol%, 3 mg) and  $\text{K}_2\text{CO}_3$  (30 mg, 0.2 mmol, 1.1 equiv.) were added to a solution of **12** (56.8 mg, 0.2 mmol) in MeOH (1 mL) under argon atmosphere, the reaction mixture was stirred in an oil bath at 60 °C for 16 h. The reaction was cooled down and diluted with EtOAc. Silica was added to the flask and concentrated under vacuum using a rotary evaporator. The resulting residue was then purified by flash column chromatography using a PE/EtOAc system (PE/EtOAc, 3/1, v/v) to afford product **53** as a yellowish powder (62.2 mg, 70% yield).<sup>[3]</sup>

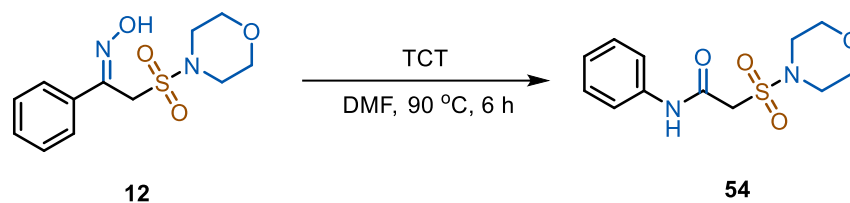

Cyanuric chloride (73.2 mg, 0.4 mmol, 2.0 equiv.) was added in DMF (0.2 mL) under oxygen atmosphere, after stirring the mixture for 30 minutes at room temperature, **12** (56.8 mg, 0.2 mmol) in DMF (0.2 mL) was added and the mixture was stirred at 90 °C for 6 h. The reaction was cooled down and diluted with EtOAc. Silica was added to the flask and concentrated under vacuum using a rotary evaporator. The resulting residue was then purified by flash column chromatography using a PE/EtOAc system (PE/EtOAc, 2/1, v/v) to afford product **54** as a white powder (47.7 mg, 84% yield).<sup>[4]</sup>

## 4.2. Scale up in continuous-flow reactors.

$V = 1 \text{ mL}$ ,  $OD = 1.6 \text{ mm}$ ,  $ID = 0.8 \text{ mm}$ ,  $\text{length} = 200 \text{ cm}$ .

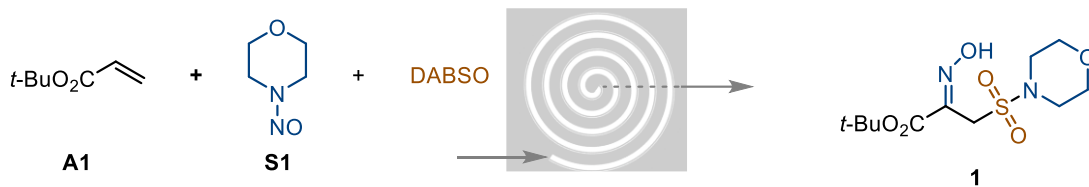

| flow rate                   | collection time | residence time | conversion | yield | productivity |
|-----------------------------|-----------------|----------------|------------|-------|--------------|
| 50 $\mu\text{L}/\text{min}$ | 200 min         | 20 min         | 100%       | 70%   | 0.3 mmol/h   |

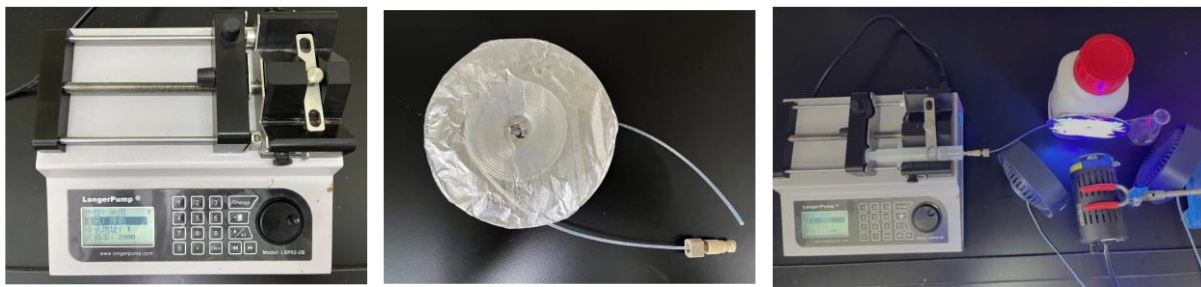

The flow apparatus was purged with degassed DCM to remove the air first. A 20 mL Erlenmeyer flask was charged with **A1** (128.5 mg, 1 mmol), **S1** (175.0 mg, 1.5 mmol, 1.5 equiv.) and DABSO (481.0 mg, 2.0 mmol, 2.0 equiv.) in  $\text{DCM}/\text{H}_2\text{O} = 4:1$  (10 mL) followed by sonication for 5 minutes, placed in a 20 mL disposable syringe and mounted on a syringe pump. The mixture liquid feed was pumped into the flow reactor. The tubing was then irradiated by a 40 W 390 nm Kessil lamp. The flow apparatus itself was set up with residence time = 20 min, flow rate = 50  $\mu\text{L}/\text{min}$ . Upon completion, the reaction diluted with EtOAc and silica was added to the flask and concentrated under vacuum using a rotary evaporator. The resulting residue was then purified by flash column chromatography using a PE/EtOAc system (PE/EtOAc, 3/1, v/v) to afford product **1** as a white powder (215.6 mg, 70% yield).

## 5. Mechanistic investigations.

### 5.1. Radical trapping experiments.

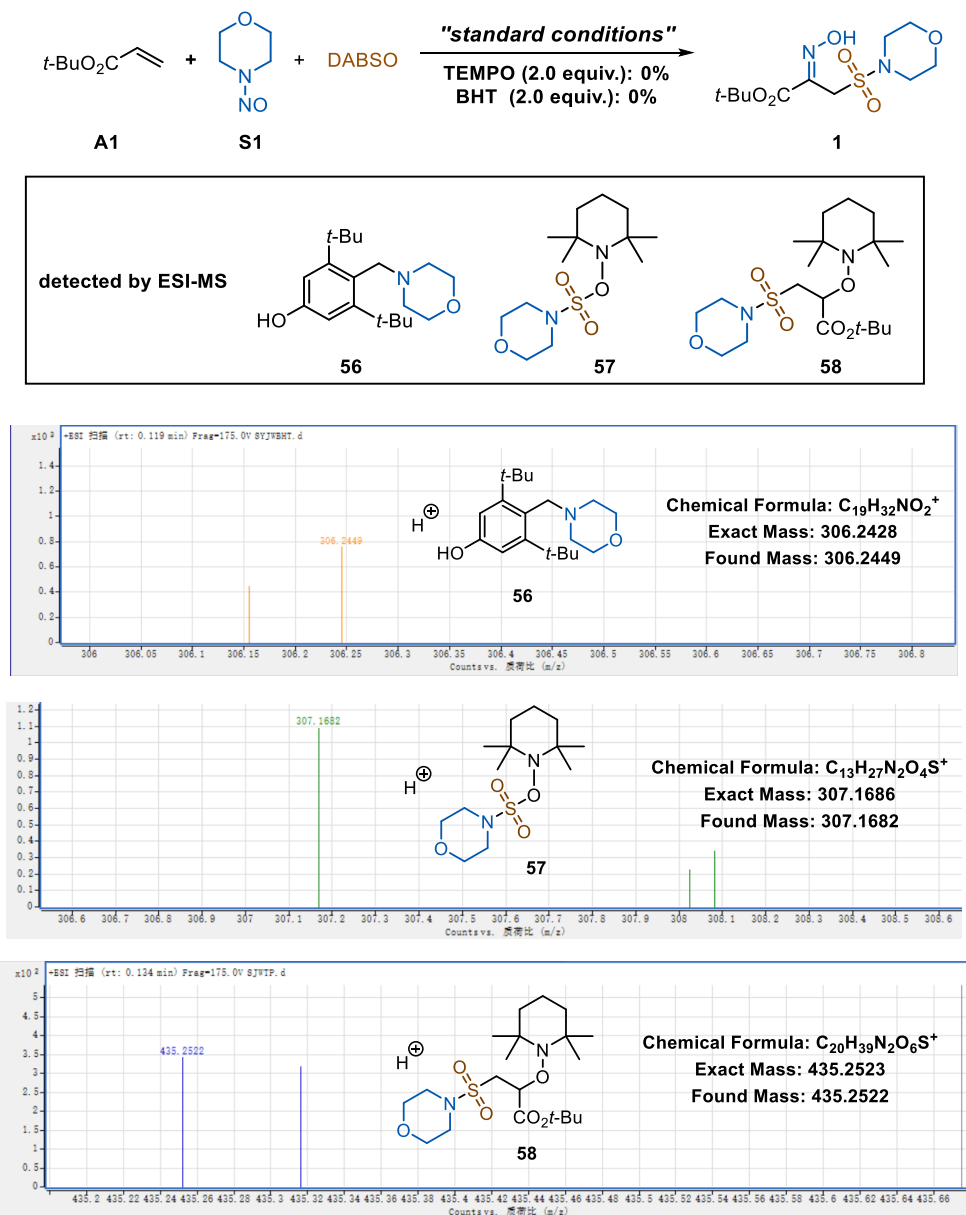

The reaction was conducted in an oven-dried 3-mL vial equipped with a stir bar. **A1** (25.7 mg, 0.2 mmol), **S1** (35.0 mg, 0.3 mmol, 1.5 equiv.), DABSO (96.2 mg, 0.4 mmol, 2.0 equiv.), TEMPO (31.3 mg, 0.2 mmol, 2.0 equiv.) or BHT (44.1 mg, 0.2 mmol, 2.0 equiv.) were sequentially added in DCM (2 mL) under argon atmosphere. The mixture was stirred at room temperature with cooling fans under irradiation of 40 W 390 nm LED lamps (Kessil KSPR160–390 LED Grow Light; 5–6 cm away). Upon completion, the crude mixture was analyzed by ESI-MS.

## 5.2. Studies with radical initiators.

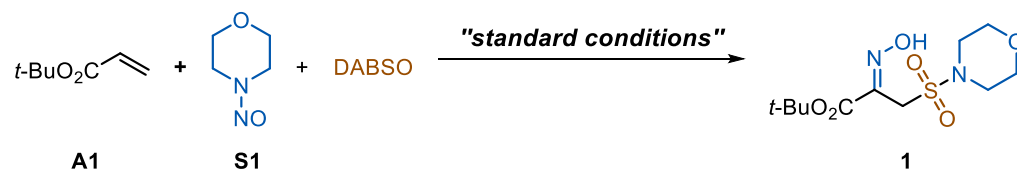

| deviation from standard conditions                |                   | yield (%) |
|---------------------------------------------------|-------------------|-----------|
| adding radical initiator,<br>60 °C, without light | AIBN (1.0 equiv.) | 0         |
|                                                   | DTBP (1.0 equiv.) | 0         |
|                                                   | BPO (1.0 equiv.)  | 0         |
|                                                   | DLP (10 mol%)     | 0         |

The reaction was performed in a 15 mL pressure tube, **A1** (25.7 mg, 0.2 mmol), **S1** (35.0 mg, 0.3 mmol, 1.5 equiv.), **DABSO** (96.2 mg, 0.4 mmol, 2.0 equiv.) were dissolved in DCM (2 mL) under argon atmosphere. Radical initiator was added and the tube was sealed. The reaction mixture was stirred at 60 °C for 7 h (oil bath as the heat source). Upon completion, the yield was determined by  $^1\text{H}$  NMR using 1,3,5-trimethoxybenzene as an internal standard.

### 5.3. Ultraviolet-visible absorption experiments.

UV-vis absorption spectra of **S1**, DABSO and **S1**+DABSO in DCM were recorded in screw-top 1.0 cm quartz cuvettes using a METASH UV-8000S (T) spectrophotometer. The concentration of each component was  $5 \times 10^{-4}$  M.

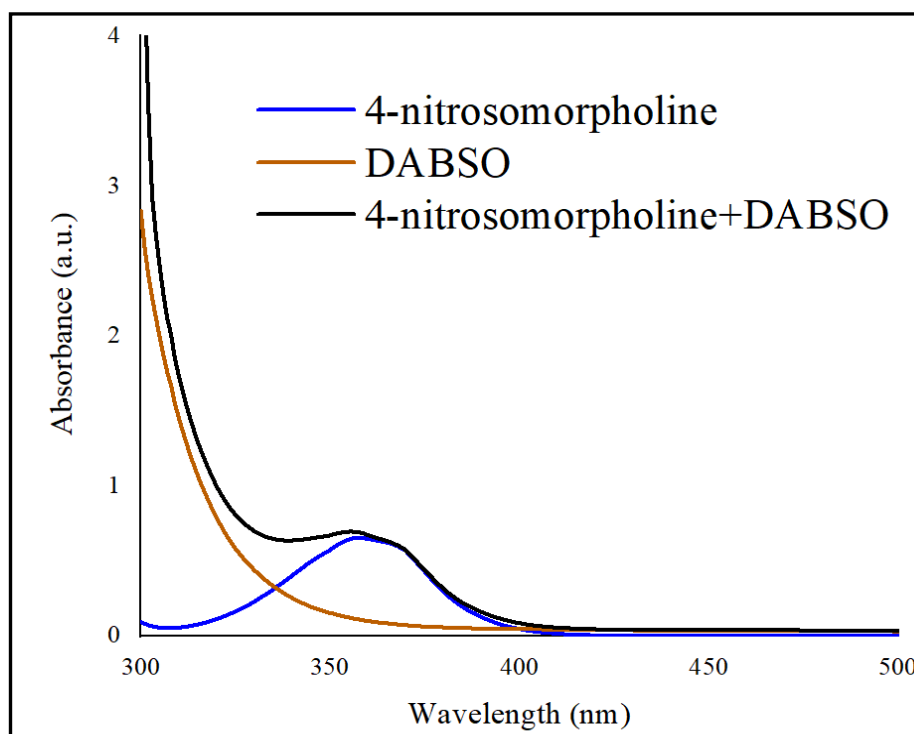

**Figure S3.** UV-vis absorption spectroscopy.

#### 5.4. NMR experiments.

The reaction was conducted in an oven-dried 3-mL vial equipped with a stir bar. **A1** (25.7 mg, 0.2 mmol), **S1** (35.0 mg, 0.3 mmol, 1.5 equiv.) and DABSO (96.2 mg, 0.4 mmol, 2.0 equiv.) were sequentially added in DCM (2 mL) under argon atmosphere. The reaction mixture was stirred for 7 h and then transferred to an NMR tube for analysis.

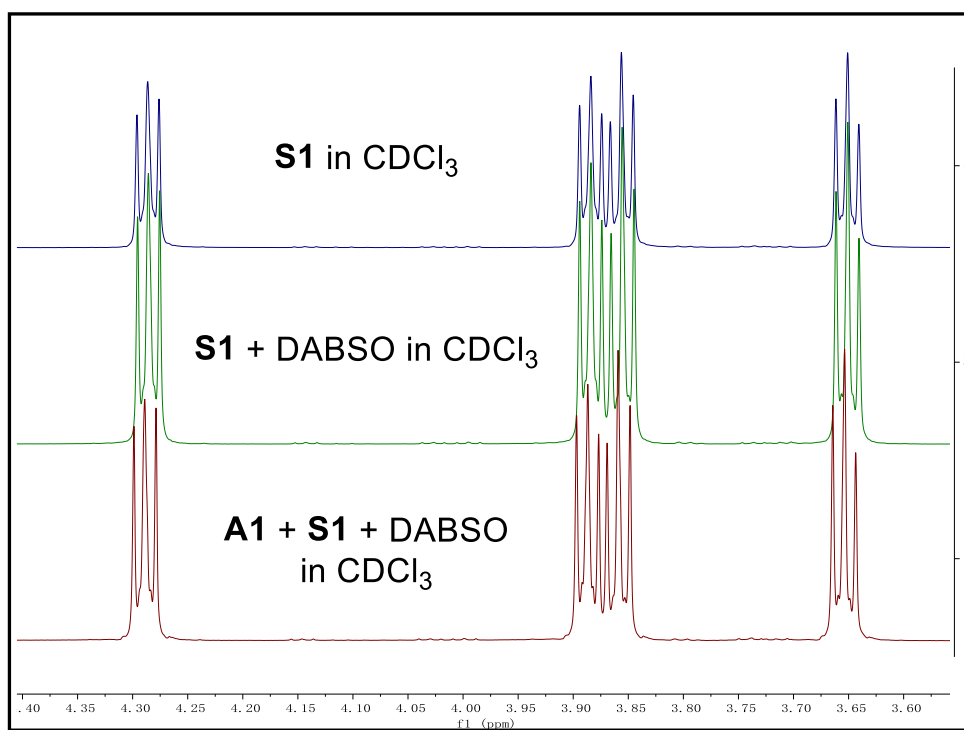

**Figure S4.** NMR experiments.





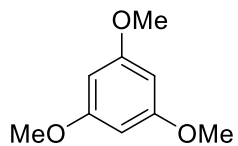

1,3,5-trimethoxybenzene  
0.1 mmol

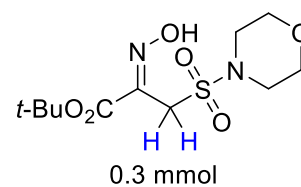

0.3 mmol

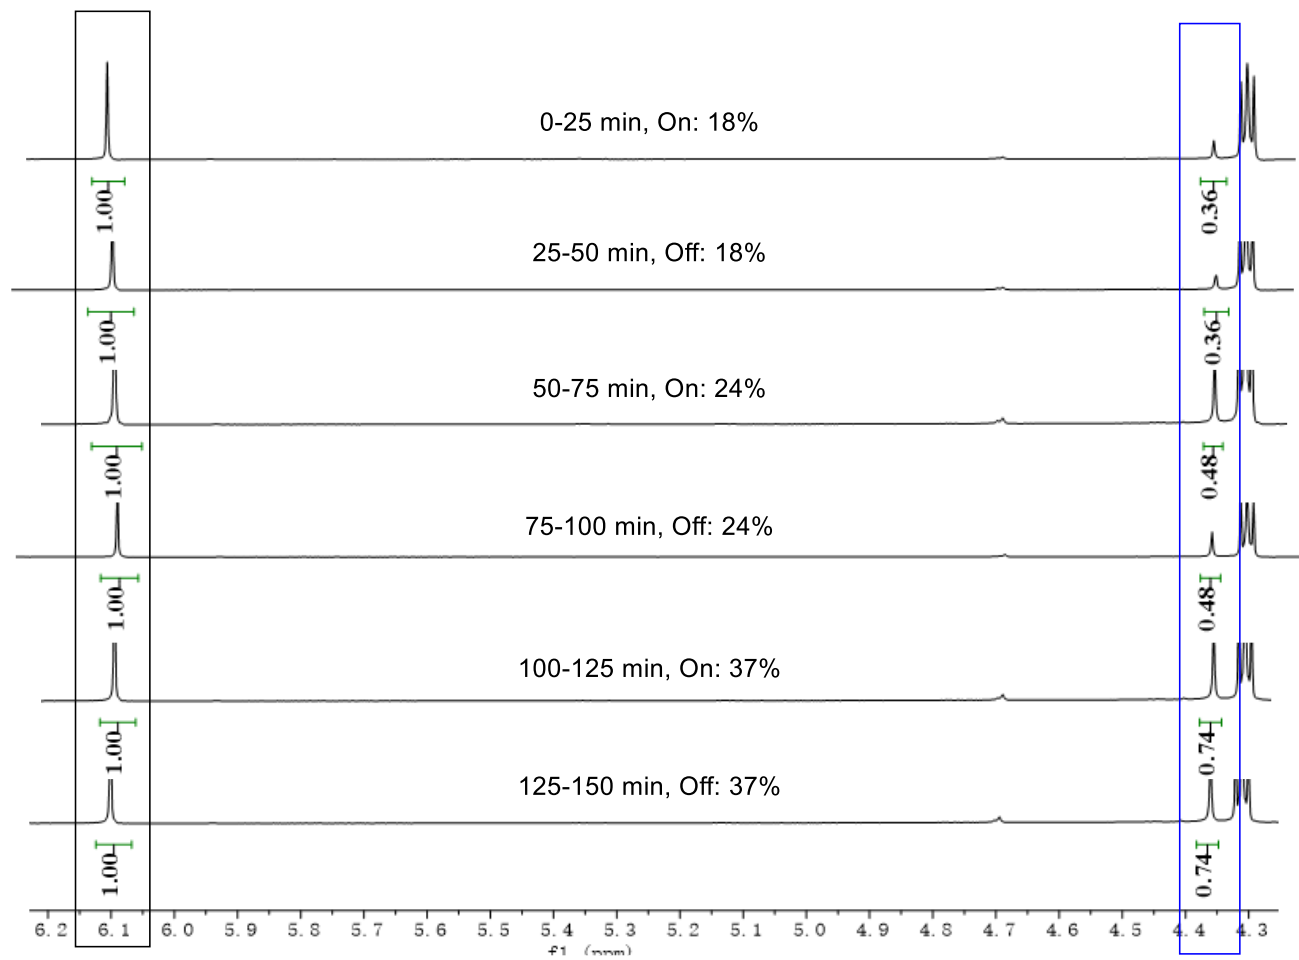

## 5.6. Calculation of quantum yield.

### Determination of the light intensity at 390 nm:

Standard ferrioxalate actinometry was used to determine the photon flux of the LED lamp (40 W 390 nm).<sup>[5-7]</sup> A 0.15 M solution of ferrioxalate was prepared by dissolving potassium ferrioxalate trihydrate (646.5 mg, 1.5 mmol) in 0.20 M aqueous H<sub>2</sub>SO<sub>4</sub> (10.0 mL). A buffered solution of 1,10-phenanthroline (0.15 M) was prepared by dissolving NaOAc (1.23 g, 15.0 mmol) and 1,10-phenanthroline (540.6 mg, 3.0 mmol) in 0.20 M aqueous H<sub>2</sub>SO<sub>4</sub> (20 mL). To a 10 mL Schlenk tube was added the ferrioxalate solution (1.0 mL) and the tube was sealed and irradiated with a LED lamp (40 W 390 nm) for 300 s while maintaining the temperature at room temperature through cooling with a fan. The aqueous sulfuric acid (3.0 mL) and buffered solution (4.0 mL) were added immediately. The resulting mixture was then placed in the dark for 1 h to allow the formed ferrous ions to react completely with the 1,10-phenanthroline. An aliquot (25  $\mu$ L) of the resulting solution was diluted with 0.20 M aqueous sulfuric acid (3.0 mL), the solution was transferred to a cuvette ( $l = 1.0$  cm) and the absorbance at a wavelength of 510 nm was measured by UV-vis spectrometry. The above procedure was repeated three times, and the average absorption was used for the calculation of the photon flux. A nonirradiated sample was also prepared and the absorbance at 510 nm was measured. The photon flux was calculated as follows:

$$\text{mol Fe}^{2+} = \frac{V \times \Delta A (510 \text{ nm}) \times 100}{l \times \epsilon} \quad (1)$$

Where  $V$  is the total volume (0.00325 L) of the solution that was analyzed,  $\Delta A$  (0.48201) is the difference between the average absorption of irradiated and non-irradiated solutions at 510 nm,  $l$  is the path length (1.00 cm), and  $\epsilon$  is the molar absorptivity of the ferrioxalate actinometer at 510 nm (11,100 L·mol<sup>-1</sup>·cm<sup>-1</sup>)<sup>[5]</sup>.

The photon flux was calculated as follows:

$$\text{photon flux} = \frac{\text{mol Fe}^{2+}}{\phi \times t \times f} \quad (2)$$

Where  $\Phi$  is the quantum yield for the ferrioxalate actinometer (approximated as 0.783, which was the average value from the reported at  $\lambda = 405$  nm and  $\lambda = 385$  nm<sup>[5-6]</sup>),  $t$  is the irradiation time (300 s), and  $f$  is the fraction of light absorbed at  $\lambda = 390$  nm by the ferrioxalate actinometer. This value was calculated using the following equation where  $A(390 \text{ nm})$  is the absorption of the ferrioxalate solution at 390 nm.

$$f = 1 - 10^{-A(390 \text{ nm})} = 0.23167 \quad (3)$$

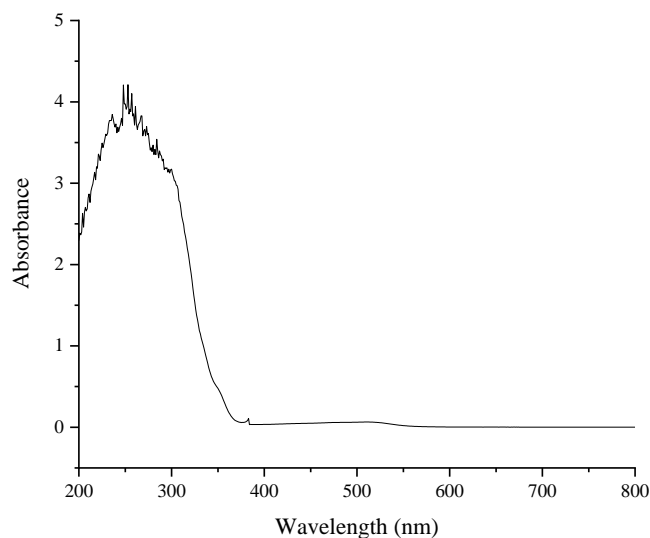

**Figure S6.** Absorbance of the ferrioxalate actinometer solution

The average photon flux was thus calculated to be  $2.06 \times 10^{-7}$  einstein  $\text{s}^{-1}$ .

Sample calculation:

$$\text{mol Fe}^{2+} = \frac{V \times \Delta A(510 \text{ nm}) \times 100}{l \times \epsilon} = \frac{0.00325 \text{ L} \times 0.381121 \times 100}{1.000 \text{ cm} \times 11100 \text{ L mol}^{-1} \text{cm}^{-1}} = 1.12 \times 10^{-5} \text{ mol}$$

$$\text{photon flux} = \frac{\text{mol Fe}^{2+}}{\phi \times t \times f} = \frac{1.12 \times 10^{-5} \text{ mol}}{0.783 \times 300 \text{ s} \times 0.23167} = 2.06 \times 10^{-7} \text{ einstein s}^{-1}$$

### Determination of quantum yield:

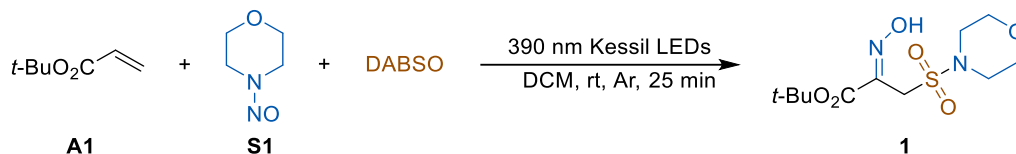

**A1** (38.6 mg, 0.3 mmol), **S1** (52.5 mg, 0.45 mmol, 1.5 equiv.), DABSO (144.3 mg, 0.6 mmol, 2.0 equiv.) and internal standard (1,3,5-trimethoxybenzene, 0.1 mmol, 16.8 mg) were added into a dry 10 mL Schlenk tube equipped with a stir bar. The tube was evacuated and back filled with argon for three times, followed by the addition of DCM (3 mL) via syringe. The mixture was stirred at room temperature with cooling fans under irradiation of 40 W 390 nm LED lamps (Kessil KSPR160–390 LED Grow Light; 5–6 cm away). The reaction mixture then taken at the 25 min and the yield was determined by  $^1\text{H}$  NMR.

The quantum yield was determined using eq 4.

$$\phi = \frac{\text{mol product}}{\text{flux} \times t \times f} \quad (4)$$

Sample quantum yield calculation:

$$\phi = \frac{0.3 \times 10^{-3} \text{ mol} \times 0.18}{2.06 \times 10^{-7} \times 1500 \text{ s} \times 0.89731} = 0.15$$



## 7. The X-ray crystallographic data.

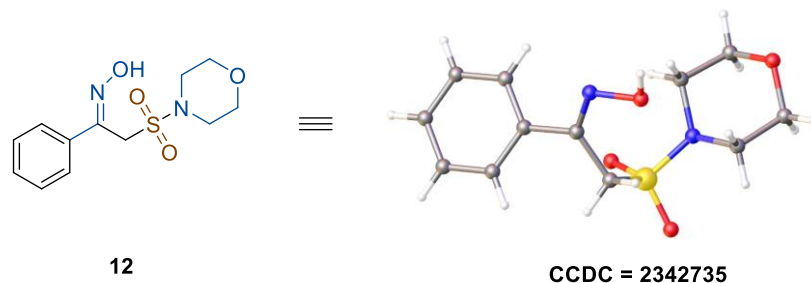

**Figure 7.** X-ray crystal structure of **12** (CCDC = 2342735).

To a 3-mL vial, the corresponding samples **12** (10.0 mg) were dissolved in  $\text{CDCl}_3$  (2 mL). The vial was left uncovered and the sample was carefully setting in room temperature. The crystal was obtained by slow evaporation of **12** in  $\text{CDCl}_3$ . Single crystal X-ray crystallography data was obtained on Bruker D8 venture.

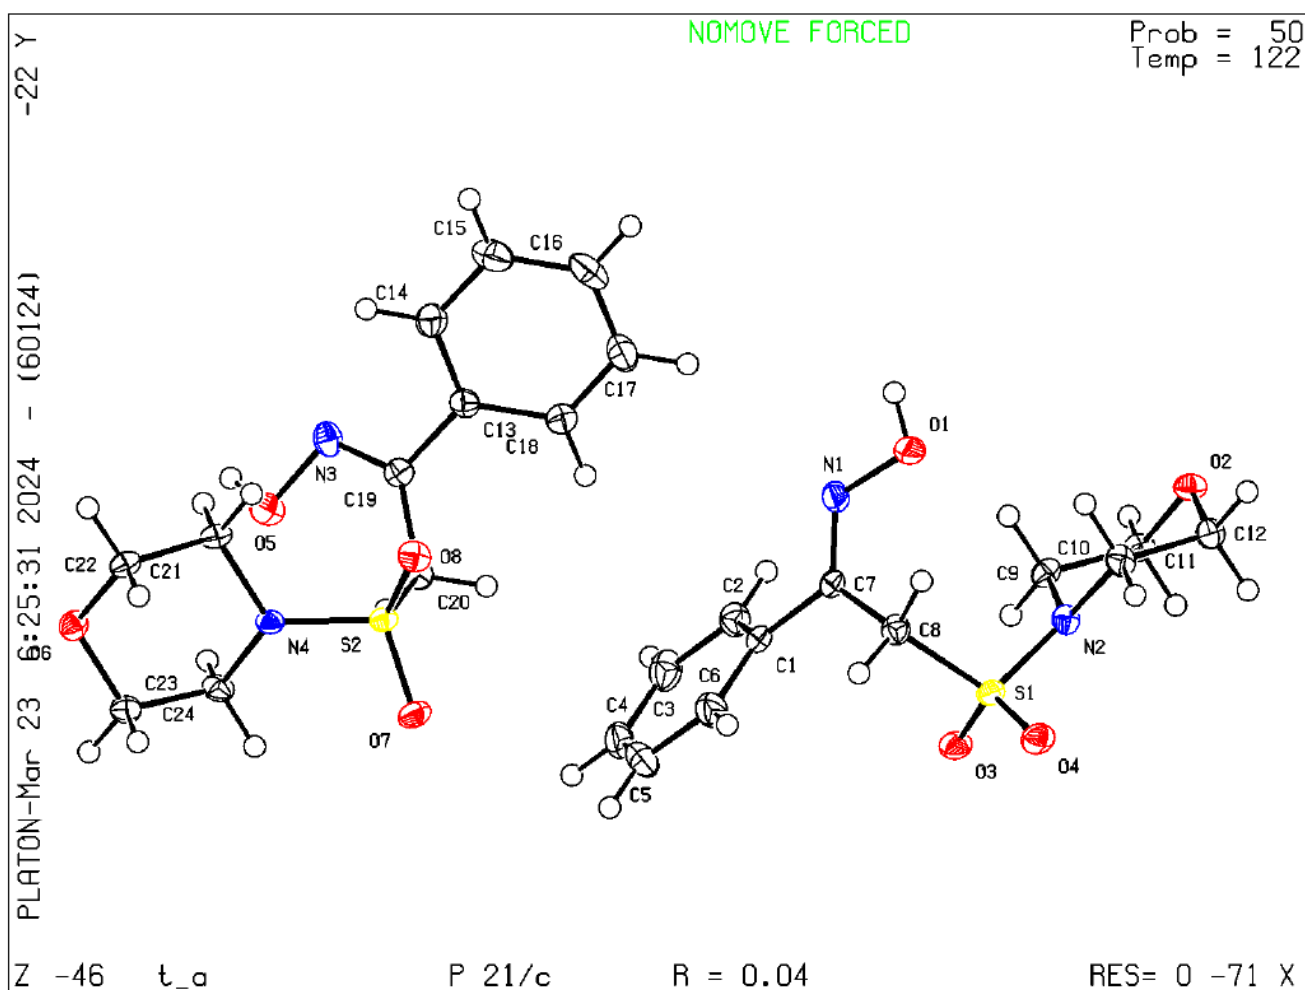

**Table S1 Crystal data and structure refinement for 12.**

|                                               |                                                                 |
|-----------------------------------------------|-----------------------------------------------------------------|
| Identification code                           | <b>12</b>                                                       |
| Empirical formula                             | C <sub>12</sub> H <sub>16</sub> N <sub>2</sub> O <sub>4</sub> S |
| Formula weight                                | 284.33                                                          |
| Temperature/K                                 | 122(2)                                                          |
| Crystal system                                | monoclinic                                                      |
| Space group                                   | P2 <sub>1</sub> /c                                              |
| <i>a</i> /Å                                   | 25.691(2)                                                       |
| <i>b</i> /Å                                   | 5.5958(5)                                                       |
| <i>c</i> /Å                                   | 19.8517(18)                                                     |
| α/°                                           | 90                                                              |
| β/°                                           | 112.73                                                          |
| γ/°                                           | 90                                                              |
| Volume/Å <sup>3</sup>                         | 2632.3(4)                                                       |
| <i>Z</i>                                      | 8                                                               |
| Density (calculated) mg/cm <sup>3</sup>       | 1.435                                                           |
| Absorption coefficient mm <sup>-1</sup>       | 2.316                                                           |
| F(000)                                        | 1200                                                            |
| Crystal size/mm <sup>3</sup>                  | 0.180 × 0.160 × 0.140                                           |
| 2θ range for data collection/                 | 1.864 to 68.916                                                 |
| Index ranges                                  | -30 ≤ <i>h</i> ≤ 30, -6 ≤ <i>k</i> ≤ 6, -23 ≤ <i>l</i> ≤ 23     |
| Reflections collected                         | 33666                                                           |
| Independent reflections                       | 4822 [R <sub>int</sub> = 0.0416]                                |
| Data/restraints/parameters                    | 4822/1/349                                                      |
| Goodness-of-fit on F <sup>2</sup>             | 1.045                                                           |
| Final R indexes [ <i>I</i> ≥ 2σ ( <i>I</i> )] | R <sub>1</sub> = 0.0358 wR <sub>2</sub> = 0.0986                |
| Final R indexes [all data]                    | R <sub>1</sub> = 0.0409, wR <sub>2</sub> = 0.1028               |
| Largest diff. peak/hole / e Å <sup>-3</sup>   | 0.771 and -0.490                                                |

## 8. Characterization data of new compounds.

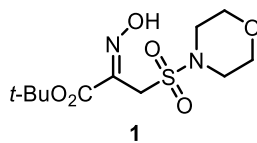

**tert-butyl (Z)-2-(hydroxyimino)-3-(morpholinosulfonyl)propanoate:** This compound was prepared by using the general procedure (eluent: PE/EtOAc, 1/1, v/v). The product **1** (44.4 mg, 72% yield) was obtained as a white powder.

**<sup>1</sup>H NMR** (500 MHz, CDCl<sub>3</sub>):  $\delta$  = 11.06 (s, 1H), 4.37 (s, 2H), 3.75–3.73 (m, 4H), 3.32–3.30 (m, 4H), 1.56 (s, 9H) ppm.

**<sup>13</sup>C NMR** (125 MHz, CDCl<sub>3</sub>):  $\delta$  = 161.4, 143.6, 84.5, 66.8, 45.6, 44.0, 28.0 ppm.

**HRMS** ( $m/z$ ): [M+Na]<sup>+</sup> calcd for C<sub>11</sub>H<sub>20</sub>N<sub>2</sub>NaO<sub>6</sub>S<sup>+</sup> 331.0934, found 331.0942.

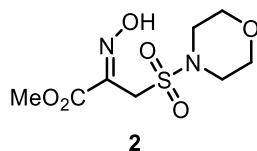

**methyl (Z)-2-(hydroxyimino)-3-(morpholinosulfonyl)propanoate:** This compound was prepared by using the general procedure (eluent: PE/EtOAc, 1/1, v/v). The product **2** (37.3 mg, 70% yield) was obtained as a white powder.

**<sup>1</sup>H NMR** (500 MHz, CDCl<sub>3</sub>):  $\delta$  = 11.11 (s, 1H), 4.42 (s, 2H), 3.93 (s, 3H), 3.77–3.75 (m, 4H), 3.33–3.31 (m, 4H) ppm.

**<sup>13</sup>C NMR** (125 MHz, CDCl<sub>3</sub>):  $\delta$  = 163.1, 142.6, 66.8, 53.7, 45.5, 44.0 ppm.

**HRMS** ( $m/z$ ): [M+H]<sup>+</sup> calcd for C<sub>8</sub>H<sub>15</sub>N<sub>2</sub>O<sub>6</sub>S<sup>+</sup> 267.0645, found 267.0650.



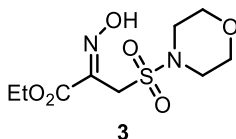

**ethyl (Z)-2-(hydroxyimino)-3-(morpholinosulfonyl)propanoate:** This compound was prepared by using the general procedure (eluent: PE/EtOAc, 1/1, v/v). The product **3** (44.3 mg, 79% yield) was obtained as a white powder.

**<sup>1</sup>H NMR** (500 MHz, CDCl<sub>3</sub>): δ = 11.12 (s, 1H), 4.41–4.37 (m, 4H), 3.77–3.75 (m, 4H), 3.33–3.31 (m, 4H), 1.37 (t, *J* = 7.1 Hz, 3H) ppm.

**<sup>13</sup>C NMR** (125 MHz, CDCl<sub>3</sub>): δ = 162.6, 142.8, 66.8, 63.0, 45.5, 44.0, 14.2 ppm.

**HRMS** (*m/z*): [M+H]<sup>+</sup> calcd for C<sub>9</sub>H<sub>17</sub>N<sub>2</sub>O<sub>6</sub>S<sup>+</sup> 281.0802, found 281.0805.

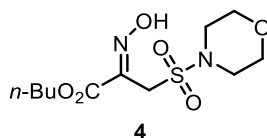

**butyl (Z)-2-(hydroxyimino)-3-(morpholinosulfonyl)propanoate:** This compound was prepared by using the general procedure (eluent: PE/EtOAc, 1/1, v/v). The product **4** (42.5 mg, 69% yield) was obtained as a colorless oil.

**<sup>1</sup>H NMR** (500 MHz, CDCl<sub>3</sub>): δ = 10.98 (brs, 1H), 4.41 (s, 2H), 4.33 (t, *J* = 6.8 Hz, 2H), 3.77–3.75 (m, 4H), 3.33–3.31 (m, 4H), 1.75–1.69 (m, 2H), 1.45–1.38 (m, 2H), 0.94 (t, *J* = 7.4 Hz, 3H) ppm.

**<sup>13</sup>C NMR** (125 MHz, CDCl<sub>3</sub>): δ = 162.7, 142.8, 66.9, 45.5, 44.0, 30.5, 19.1, 13.8 ppm.

**HRMS** (*m/z*): [M+H]<sup>+</sup> calcd for C<sub>11</sub>H<sub>21</sub>N<sub>2</sub>O<sub>6</sub>S<sup>+</sup> 309.1115, found 309.1117.

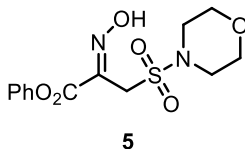

**phenyl (Z)-2-(hydroxyimino)-3-(morpholinosulfonyl)propanoate:** This compound was prepared by using the general procedure (eluent: PE/EtOAc, 1/1, v/v). The product **5** (42.6 mg, 65% yield) was obtained as a yellowish powder.

**<sup>1</sup>H NMR** (500 MHz, CDCl<sub>3</sub>):  $\delta$  = 11.14 (brs, 1H), 7.43–7.40 (m, 2H), 7.30–7.27 (m, 1H), 7.21–7.19 (m, 2H), 4.51 (s, 2H), 3.77–3.75 (m, 4H), 3.36–3.34 (m, 4H) ppm.

**<sup>13</sup>C NMR** (125 MHz, CDCl<sub>3</sub>):  $\delta$  = 161.4, 150.3, 142.7, 129.8, 126.8, 121.5, 66.8, 45.7, 44.2 ppm.

**HRMS** (*m/z*): [M+H]<sup>+</sup> calcd for C<sub>13</sub>H<sub>17</sub>N<sub>2</sub>O<sub>6</sub>S<sup>+</sup> 329.0802, found 329.0810.

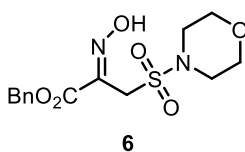

**benzyl (Z)-2-(hydroxyimino)-3-(morpholinosulfonyl)propanoate:** This compound was prepared by using the general procedure (eluent: PE/EtOAc, 1/1, v/v). The product **6** (52.7 mg, 77% yield) was obtained as a white powder.

**<sup>1</sup>H NMR** (500 MHz, CDCl<sub>3</sub>):  $\delta$  = 11.16 (brs, 1H), 7.41–7.33 (m, 5H), 5.33 (s, 2H), 4.38 (s, 2H), 3.70–3.69 (m, 4H), 3.26–3.24 (m, 4H) ppm.

**<sup>13</sup>C NMR** (125 MHz, CDCl<sub>3</sub>):  $\delta$  = 162.5, 142.5, 134.7, 128.9, 128.8, 128.8, 68.5, 66.7, 45.5, 44.0 ppm.

**HRMS** (*m/z*): [M+H]<sup>+</sup> calcd for C<sub>14</sub>H<sub>19</sub>N<sub>2</sub>O<sub>6</sub>S<sup>+</sup> 343.0958, found 343.0962.

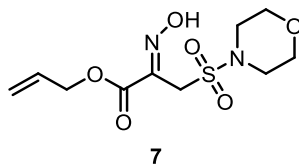

**allyl (Z)-2-(hydroxyimino)-3-(morpholinylsulfonyl)propanoate:** This compound was prepared by using the general procedure (eluent: PE/EtOAc, 1/1, v/v). The product **7** (36.2 mg, 62% yield) was obtained as a colorless oil.

**<sup>1</sup>H NMR** (500 MHz, CDCl<sub>3</sub>): δ = 10.94 (s, 1H), 6.01–5.94 (m, 1H), 5.41 (dd, *J* = 17.2, 1.5 Hz, 1H), 5.31 (dd, *J* = 10.4, 1.3 Hz, 1H), 4.82 (d, *J* = 5.9 Hz, 2H), 4.42 (s, 2H), 3.77–3.75 (m, 4H), 3.33–3.31 (m, 4H) ppm.

**<sup>13</sup>C NMR** (125 MHz, CDCl<sub>3</sub>): δ = 162.3, 142.7, 131.0, 120.0, 67.4, 66.8, 45.5, 44.0 ppm.

**HRMS** (*m/z*): [M+H]<sup>+</sup> calcd for C<sub>10</sub>H<sub>17</sub>N<sub>2</sub>O<sub>6</sub>S<sup>+</sup> 293.0802, found 293.0807.

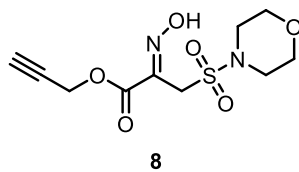

**prop-2-yn-1-yl (Z)-2-(hydroxyimino)-3-(morpholinylsulfonyl)propanoate:** This compound was prepared by using the general procedure (eluent: PE/EtOAc, 1/1, v/v). The product **8** (29.0 mg, 50% yield) was obtained as a white powder.

**<sup>1</sup>H NMR** (500 MHz, CD<sub>3</sub>CN): δ = 10.95 (brs, 1H), 4.85 (d, *J* = 2.4 Hz, 2H), 4.33 (s, 2H), 3.65–3.63 (m, 4H), 3.19–3.17 (m, 4H), 2.85 (t, *J* = 2.4 Hz, 1H) ppm.

**<sup>13</sup>C NMR** (125 MHz, CD<sub>3</sub>CN): δ = 162.9, 142.9, 78.1, 77.0, 67.0, 54.1, 46.4, 44.3 ppm.

**HRMS** (*m/z*): [M+H]<sup>+</sup> calcd for C<sub>10</sub>H<sub>15</sub>N<sub>2</sub>O<sub>6</sub>S<sup>+</sup> 291.0645, found 291.0644.

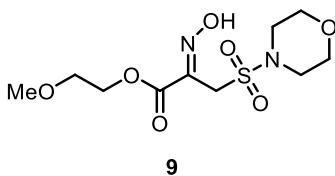

**methyl (Z)-2-(hydroxyimino)-3-(morpholinosulfonyl)propanoate:** This compound was prepared by using the general procedure (eluent: PE/EtOAc, 1/1, v/v). The product **9** (45.9 mg, 74% yield) was obtained as a colorless oil.

**<sup>1</sup>H NMR** (500 MHz, CDCl<sub>3</sub>): δ = 11.50 (brs, 1H), 4.47–4.45 (m, 2H), 4.41 (s, 2H), 3.74–3.72 (m, 4H), 3.70–3.68 (m, 2H), 3.40 (s, 3H), 3.30–3.29 (m, 4H) ppm.

**<sup>13</sup>C NMR** (125 MHz, CDCl<sub>3</sub>): δ = 162.6, 142.3, 70.1, 66.8, 65.2, 59.0, 45.5, 44.0 ppm.

**HRMS** (*m/z*): [M+H]<sup>+</sup> calcd for C<sub>10</sub>H<sub>19</sub>N<sub>2</sub>O<sub>7</sub>S<sup>+</sup> 311.0907, found 311.0910.

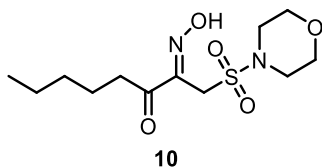

**(Z)-2-(hydroxyimino)-1-(morpholinosulfonyl)octan-3-one:** This compound was prepared by using the general procedure (eluent: PE/EtOAc, 2/1, v/v). The product **10** (39.2 mg, 64% yield) was obtained as a white powder.

**<sup>1</sup>H NMR** (500 MHz, CDCl<sub>3</sub>): δ = 9.97 (s, 1H), 4.38 (s, 2H), 3.79–3.77 (m, 4H), 3.33–3.31 (m, 4H), 2.81 (t, *J* = 7.5 Hz, 2H), 1.66–1.61 (m, 2H), 1.30–1.28 (m, 4H), 0.88 (t, *J* = 6.7 Hz, 3H) ppm.

**<sup>13</sup>C NMR** (125 MHz, CDCl<sub>3</sub>): δ = 197.5, 148.7, 66.8, 45.6, 41.6, 37.5, 31.5, 23.7, 22.6, 14.1 ppm.

**HRMS** (*m/z*): [M+H]<sup>+</sup> calcd for C<sub>12</sub>H<sub>23</sub>N<sub>2</sub>O<sub>5</sub>S<sup>+</sup> 307.1322, found 307.1325.

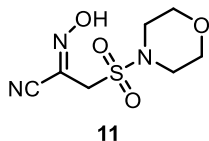

**(Z)-N-hydroxy-2-(morpholinylsulfonyl)acetimidoyl cyanide:** This compound was prepared by using the general procedure (eluent: PE/EtOAc, 1/2, v/v). The product **11** (19.1 mg, 41% yield) was obtained as a white powder.

**<sup>1</sup>H NMR** (500 MHz, CDCl<sub>3</sub>):  $\delta$  = 7.11 (s, 1H), 5.73 (s, 1H), 4.13–4.11 (m, 2H), 3.76–3.71 (m, 4H), 3.68–3.66 (m, 2H) ppm.

**<sup>13</sup>C NMR** (125 MHz, CDCl<sub>3</sub>):  $\delta$  = 163.1, 160.2, 67.3, 66.8, 47.2, 43.6 ppm.

**HRMS** (*m/z*): [M+Na]<sup>+</sup> calcd for C<sub>7</sub>H<sub>11</sub>N<sub>3</sub>NaO<sub>4</sub>S<sup>+</sup> 256.0362, found 256.0370.

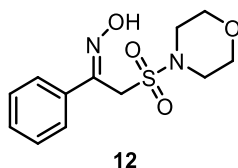

**(Z)-2-(morpholinylsulfonyl)-1-phenylethan-1-one oxime:** This compound was prepared by using the general procedure (eluent: PE/EtOAc, 2/1, v/v). The product **12** (51.1 mg, 90% yield) was obtained as a white solid.

**<sup>1</sup>H NMR** (500 MHz, CDCl<sub>3</sub>):  $\delta$  = 9.51 (s, 1H), 7.75–7.73 (m, 2H), 7.43–7.41 (m, 3H), 4.58 (s, 2H), 3.72–3.70 (m, 4H), 3.34–3.32 (m, 4H) ppm.

**<sup>13</sup>C NMR** (125 MHz, CDCl<sub>3</sub>):  $\delta$  = 148.7, 133.8, 130.2, 128.8, 126.7, 66.9, 45.9, 45.6 ppm.

**HRMS** (*m/z*): [M+Na]<sup>+</sup> calcd for C<sub>12</sub>H<sub>16</sub>N<sub>2</sub>NaO<sub>4</sub>S<sup>+</sup> 307.0723, found 307.0730.

**m.p.** : 115.9–127.8 °C.

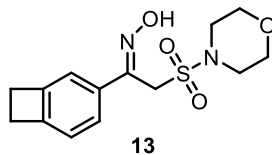

**(Z)-1-(bicyclo[4.2.0]octa-1(6),2,4-trien-3-yl)-2-(morpholinylsulfonyl)ethan-1-one oxime:** This compound was prepared by using the general procedure (eluent: PE/EtOAc, 2/1, v/v). The product **13** (47.7 mg, 77% yield, *Z/E* = 1.3:1) was obtained as a white powder.

**<sup>1</sup>H NMR** (500 MHz, CDCl<sub>3</sub>): δ = 7.55–7.07 (m, 3H), 4.57 and 4.21 (s, 2H), 3.70–3.66 (m, 4H), 3.33–3.29 (m, 4H), 3.20–3.18 (m, 4H) ppm.

**<sup>13</sup>C NMR** (125 MHz, CDCl<sub>3</sub>): δ = 149.5, 149.4, 148.4, 148.1, 146.3, 145.9, 132.7, 130.0, 126.9, 125.7, 122.9, 122.7, 122.6, 120.9, 66.9, 66.8, 55.8, 46.2, 46.0, 45.6, 29.9, 29.8, 29.7, 29.6 ppm.

**HRMS** (*m/z*): [M+H]<sup>+</sup> calcd for C<sub>14</sub>H<sub>19</sub>N<sub>2</sub>O<sub>4</sub>S<sup>+</sup> 311.1060, found 311.1070.

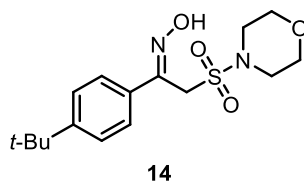

**(Z)-1-(4-(tert-butyl)phenyl)-2-(morpholinylsulfonyl)ethan-1-one oxime:** This compound was prepared by using the general procedure (eluent: PE/EtOAc, 2/1, v/v). The product **14** (61.9 mg, 91% yield) was obtained as a yellowish powder.

**<sup>1</sup>H NMR** (500 MHz, CDCl<sub>3</sub>): δ = 9.53 (s, 1H), 7.69 (d, *J* = 8.6 Hz, 2H), 7.43 (d, *J* = 8.6 Hz, 2H), 4.58 (s, 2H), 3.72–3.70 (m, 4H), 3.35–3.34 (m, 4H), 1.32 (s, 9H) ppm.

**<sup>13</sup>C NMR** (125 MHz, CDCl<sub>3</sub>): δ = 153.5, 148.5, 130.9, 126.4, 125.8, 66.9, 45.9, 45.6, 34.9, 31.3 ppm.

**HRMS** (*m/z*): [M+H]<sup>+</sup> calcd for C<sub>16</sub>H<sub>25</sub>N<sub>2</sub>O<sub>4</sub>S<sup>+</sup> 341.1530, found 341.1545.

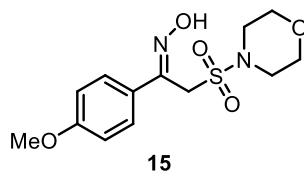

**(Z)-1-(4-methoxyphenyl)-2-(morpholinylsulfonyl)ethan-1-one oxime:** This compound was prepared by using the general procedure (eluent: PE/EtOAc, 1/1, v/v). The product **15** (47.7 mg, 76% yield) was obtained as a white powder.

**<sup>1</sup>H NMR** (500 MHz, DMSO-*d*<sub>6</sub>):  $\delta$  = 12.05 (s, 1H), 7.70–7.68 (m, 2H), 6.97–6.95 (m, 2H), 4.66 (s, 2H), 3.78 (s, 3H), 3.59–3.57 (m, 4H), 3.17–3.15 (m, 4H) ppm.

**<sup>13</sup>C NMR** (125 MHz, DMSO-*d*<sub>6</sub>):  $\delta$  = 160.1, 146.1, 127.9, 127.3, 113.7, 65.9, 55.2, 45.3, 44.0 ppm.

**HRMS** (*m/z*): [M+H]<sup>+</sup> calcd for C<sub>13</sub>H<sub>19</sub>N<sub>2</sub>O<sub>5</sub>S<sup>+</sup> 315.1009, found 315.1011.

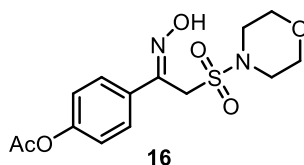

**(Z)-4-(1-(hydroxyimino)-2-(morpholinylsulfonyl)ethyl)phenyl acetate:** This compound was prepared by using the general procedure (eluent: PE/EtOAc, 1/1, v/v). The product **16** (57.5 mg, 84% yield) was obtained as a white powder.

**<sup>1</sup>H NMR** (500 MHz, CD<sub>3</sub>CN):  $\delta$  = 9.94 (s, 1H), 7.76 (d, *J* = 8.6 Hz, 2H), 7.14 (d, *J* = 8.6 Hz, 2H), 4.57 (s, 2H), 3.63–3.61 (m, 4H), 3.23–3.21 (m, 4H), 2.26 (s, 3H) ppm.

**<sup>13</sup>C NMR** (125 MHz, CD<sub>3</sub>CN):  $\delta$  = 170.3, 152.8, 148.0, 133.2, 128.7, 122.8, 67.1, 46.4, 45.1, 21.2 ppm.

**HRMS** (*m/z*): [M+H]<sup>+</sup> calcd for C<sub>14</sub>H<sub>19</sub>N<sub>2</sub>O<sub>6</sub>S<sup>+</sup> 343.0958, found 343.0977.

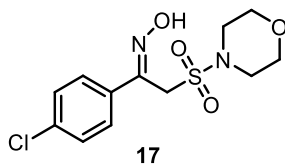

**(Z)-1-(4-chlorophenyl)-2-(morpholinosulfonyl)ethan-1-one oxime:** This compound was prepared by using the general procedure (eluent: PE/EtOAc, 2/1, v/v). The product **17** (56.6 mg, 89% yield) was obtained as a white powder.

**<sup>1</sup>H NMR** (500 MHz, CD<sub>3</sub>CN):  $\delta$  = 10.02 (s, 1H), 7.69 (d,  $J$  = 8.6 Hz, 2H), 7.40 (d,  $J$  = 8.6 Hz, 2H), 4.53 (s, 2H), 3.61–3.59 (m, 4H), 3.20–3.18 (m, 4H) ppm.

**<sup>13</sup>C NMR** (125 MHz, CD<sub>3</sub>CN):  $\delta$  = 147.8, 135.8, 134.4, 129.4, 129.1, 67.1, 46.4, 45.1 ppm.

**HRMS** ( $m/z$ ): [M+H]<sup>+</sup> calcd for C<sub>12</sub>H<sub>16</sub>ClN<sub>2</sub>O<sub>4</sub>S<sup>+</sup> 319.0514, found 319.0520.

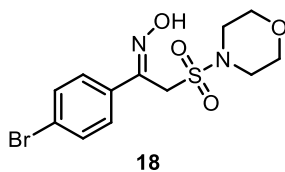

**(Z)-1-(4-bromophenyl)-2-(morpholinosulfonyl)ethan-1-one oxime:** This compound was prepared by using the general procedure (eluent: PE/EtOAc, 2/1, v/v). The product **18** (54.3 mg, 75% yield) was obtained as a white powder.

**<sup>1</sup>H NMR** (500 MHz, DMSO-*d*<sub>6</sub>):  $\delta$  = 12.43 (s, 1H), 7.71–7.69 (m, 2H), 7.62–7.60 (m, 2H), 4.70 (s, 2H), 3.59–3.57 (m, 4H), 3.17–3.15 (m, 4H) ppm.

**<sup>13</sup>C NMR** (125 MHz, DMSO-*d*<sub>6</sub>):  $\delta$  = 145.9, 134.1, 131.3, 128.5, 122.6, 65.9, 45.3, 43.8 ppm.

**HRMS** ( $m/z$ ): [M+H]<sup>+</sup> calcd for C<sub>12</sub>H<sub>16</sub>BrN<sub>2</sub>O<sub>4</sub>S<sup>+</sup> 363.0009, found 363.0007.



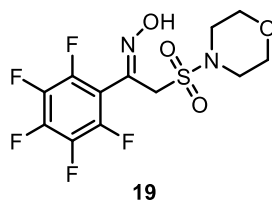

**(Z)-2-(morpholinosulfonyl)-1-(perfluorophenyl)ethan-1-one oxime:** This compound was prepared by using the general procedure (eluent: PE/EtOAc, 3/1, v/v). The product **19** (69.6 mg, 93% yield, *Z/E* = 1.1:1) was obtained as a white powder.

**<sup>1</sup>H NMR** (500 MHz, CD<sub>3</sub>OD):  $\delta$  = 4.51 and 4.31 (s, 2H), 3.71–3.36 (m, 4H), 3.35–3.31 (m, 4H) ppm.

**<sup>13</sup>C NMR** (125 MHz, CD<sub>3</sub>OD):  $\delta$  = 147.5, 145.8, 145.4, 144.0, 143.8, 142.1, 140.0, 139.8, 138.6, 138.0, 137.9, 137.0, 112.5, 109.3, 67.7, 54.6, 47.2, 46.7 ppm.

**<sup>19</sup>F NMR** (470 MHz, CD<sub>3</sub>OD)  $\delta$  = -138.7 – -138.8 (m), -143.3 – -143.4 (m), -155.6 – -155.9 (m), -164.8 – -165.1 (m) ppm.

**HRMS** (*m/z*): [M+H]<sup>+</sup> calcd for C<sub>12</sub>H<sub>12</sub>F<sub>5</sub>N<sub>2</sub>O<sub>4</sub>S<sup>+</sup> 375.0432, found 375.0430.

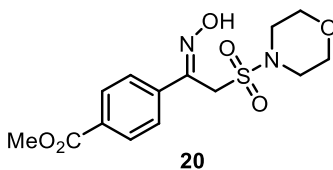

**methyl (Z)-4-(1-(hydroxyimino)-2-(morpholinosulfonyl)ethyl)benzoate:** This compound was prepared by using the general procedure (eluent: PE/EtOAc, 1/1, v/v). The product **20** (57.5 mg, 84% yield) was obtained as a white powder.

**<sup>1</sup>H NMR** (500 MHz, CD<sub>3</sub>CN):  $\delta$  = 10.22 (s, 1H), 8.02 (d, *J* = 8.4 Hz, 2H), 7.83 (d, *J* = 8.4 Hz, 2H), 4.60 (s, 2H), 3.87 (s, 3H), 3.63–3.61 (m, 4H), 3.28–3.20 (m, 4H) ppm.

**<sup>13</sup>C NMR** (125 MHz, CD<sub>3</sub>CN):  $\delta$  = 167.1, 148.2, 139.8, 131.8, 130.2, 127.7, 67.1, 52.8, 46.4, 45.1 ppm.

**HRMS** (*m/z*): [M+H]<sup>+</sup> calcd for C<sub>14</sub>H<sub>19</sub>N<sub>2</sub>O<sub>6</sub>S<sup>+</sup> 343.0958, found 343.0971.

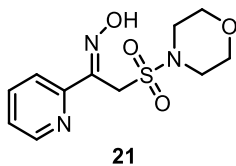

**(Z)-2-(morpholinosulfonyl)-1-(pyridin-2-yl)ethan-1-one oxime:** This compound was prepared by using the general procedure (eluent: PE/EtOAc, 1/1, v/v). The product **21** (47.9 mg, 84% yield) was obtained as a white powder.

**<sup>1</sup>H NMR** (500 MHz, CDCl<sub>3</sub>):  $\delta$  = 10.92 (s, 1H), 8.65 (d,  $J$  = 4.5 Hz, 1H), 7.89 (d,  $J$  = 8.0 Hz, 1H), 7.76–7.73 (m, 1H), 7.33 (m, 1H), 4.89 (s, 2H), 3.72–3.70 (m, 4H), 3.34–3.32 (m, 4H) ppm.

**<sup>13</sup>C NMR** (125 MHz, CDCl<sub>3</sub>):  $\delta$  = 152.1, 149.0, 148.6, 137.1, 124.5, 121.5, 66.9, 45.5, 43.9 ppm.

**HRMS** ( $m/z$ ): [M+H]<sup>+</sup> calcd for C<sub>11</sub>H<sub>16</sub>N<sub>3</sub>O<sub>4</sub>S<sup>+</sup> 286.0856, found 286.0850.

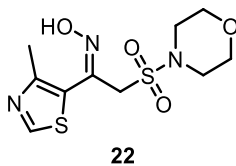

**methyl (Z)-2-(hydroxyimino)-3-(morpholinosulfonyl)propanoate:** This compound was prepared by using the general procedure (eluent: PE/EtOAc, 2/1, v/v). The product **22** (48.8 mg, 80% yield) was obtained as a yellowish powder.

**<sup>1</sup>H NMR** (500 MHz, DMSO-*d*<sub>6</sub>):  $\delta$  = 12.26 (s, 1H), 9.09 (s, 1H), 4.39 (s, 2H), 3.57–3.56 (m, 4H), 3.15–3.14 (m, 4H), 2.36 (s, 3H) ppm.

**<sup>13</sup>C NMR** (125 MHz, DMSO-*d*<sub>6</sub>):  $\delta$  = 154.5, 154.5, 152.5, 139.8, 121.1, 65.8, 54.4, 45.4, 17.2 ppm.

**HRMS** ( $m/z$ ): [M+H]<sup>+</sup> calcd for C<sub>10</sub>H<sub>16</sub>N<sub>3</sub>O<sub>4</sub>S<sub>2</sub><sup>+</sup> 306.0577, found 306.0580.

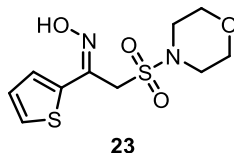

**(Z)-2-(morpholinosulfonyl)-1-(thiophen-2-yl)ethan-1-one oxime:** This compound was prepared by using the general procedure (eluent: PE/EtOAc, 2/1, v/v). The product **23** (41.8 mg, 72% yield) was obtained as a yellowish powder.

**<sup>1</sup>H NMR** (500 MHz, DMSO-*d*<sub>6</sub>):  $\delta$  = 12.53 (s, 1H), 7.78 (dd, *J* = 5.0, 1.0 Hz, 1H), 7.70 (dd, *J* = 3.9, 1.0 Hz, 1H), 7.17 (dd, *J* = 5.0, 3.9 Hz, 1H), 4.58 (s, 2H), 3.60–3.58 (m, 4H), 3.21–3.19 (m, 4H) ppm.

**<sup>13</sup>C NMR** (125 MHz, DMSO-*d*<sub>6</sub>):  $\delta$  = 140.6, 131.2, 130.8, 130.6, 125.7, 66.0, 52.7, 45.7 ppm.

**HRMS** (*m/z*): [M+H]<sup>+</sup> calcd for C<sub>10</sub>H<sub>15</sub>N<sub>2</sub>O<sub>4</sub>S<sub>2</sub><sup>+</sup> 291.0468, found 291.0478.

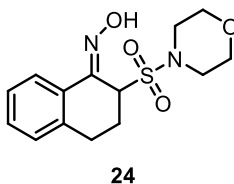

**(Z)-2-(morpholinosulfonyl)-3,4-dihydronaphthalen-1(2H)-one oxime:** This compound was prepared by using the general procedure (eluent: PE/EtOAc, 2/1, v/v). The product **24** (50.8 mg, 82% yield) was obtained as a yellowish powder.

**<sup>1</sup>H NMR** (500 MHz, CDCl<sub>3</sub>):  $\delta$  = 9.33 (s, 1H), 7.85 (d, *J* = 7.9 Hz, 1H), 7.31 (t, *J* = 7.4 Hz, 1H), 7.22–7.17 (m, 2H), 5.06 (dd, *J* = 5.1, 2.4 Hz, 1H), 3.72 (t, *J* = 4.8 Hz, 4H), 3.50–3.34 (m, 5H), 2.86–2.72 (m, 2H), 2.24–2.16 (m, 1H) ppm.

**<sup>13</sup>C NMR** (125 MHz, CDCl<sub>3</sub>):  $\delta$  = 149.5, 138.1, 130.2, 129.3, 128.8, 126.5, 124.3, 67.1, 51.7, 45.5, 25.4, 24.4 ppm.

**HRMS** (*m/z*): [M+H]<sup>+</sup> calcd for C<sub>14</sub>H<sub>19</sub>N<sub>2</sub>O<sub>4</sub>S<sup>+</sup> 311.1060, found 311.1072.

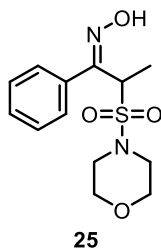

**(Z)-2-(morpholinofonyl)-1-phenylpropan-1-one oxime:** This compound was prepared by using the general procedure (eluent: PE/EtOAc, 3/1, v/v). The product **25** (37.5 mg, 63% yield, *Z/E* = 1.1:1) was obtained as a yellowish powder.

**<sup>1</sup>H NMR** (500 MHz, CDCl<sub>3</sub>): δ = 9.68 and 8.94 (s, 1H), 7.74–7.72 (m, 1H), 7.49–7.37 (m, 4H), 5.25 and 4.31 (q, *J* = 7.2, 1H), 3.74–3.67 (m, 4H), 3.48–3.34 (m, 4H), 1.63 and 1.54 (d, *J* = 7.2, 3H) ppm.

**<sup>13</sup>C NMR** (125 MHz, CDCl<sub>3</sub>): δ = 154.5, 153.4, 133.2, 131.8, 129.6, 129.6, 128.7, 128.5, 128.5, 128.3, 67.1, 62.4, 53.1, 46.6, 46.0, 14.7, 14.1 ppm.

**HRMS** (*m/z*): [M+H]<sup>+</sup> calcd for C<sub>13</sub>H<sub>19</sub>N<sub>2</sub>O<sub>4</sub>S<sup>+</sup> 299.1060, found 299.1061.

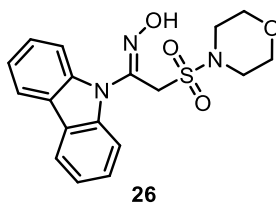

**(E)-1-(9H-carbazol-9-yl)-2-(morpholinofonyl)ethan-1-one oxime:** This compound was prepared by using the general procedure (eluent: PE/EtOAc, 1/1, v/v). The product **26** (67.1 mg, 90% yield, *Z/E* = 1:1) was obtained as a white powder.

**<sup>1</sup>H NMR** (500 MHz, CDCl<sub>3</sub>): δ = 9.01 (s, 1H), 8.08 (d, *J* = 7.7 Hz, 2H), 7.49–7.42 (m, 4H), 7.32 (t, *J* = 7.4 Hz, 2H), 4.77 (s, 2H), 3.17–3.15 (m, 4H), 2.83–2.81 (m, 4H) ppm.

**<sup>13</sup>C NMR** (125 MHz, CDCl<sub>3</sub>): δ = 143.5, 139.5, 126.7, 124.3, 121.6, 120.8, 110.7, 66.0, 45.3 ppm.

**HRMS** (*m/z*): [M+H]<sup>+</sup> calcd for C<sub>18</sub>H<sub>20</sub>N<sub>3</sub>O<sub>4</sub>S<sup>+</sup> 374.1169, found 374.1170.

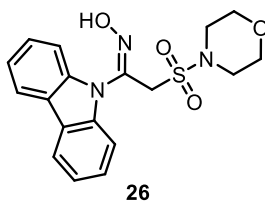

**(Z)-1-(9H-carbazol-9-yl)-2-(morpholinosulfonyl)ethan-1-one oxime:** This compound was prepared by using the general procedure (eluent: PE/EtOAc, 1/1, v/v). The product **26** (67.1 mg, 90% yield, Z/E = 1:1) was obtained as a white powder.

**<sup>1</sup>H NMR** (500 MHz, CDCl<sub>3</sub>): δ = 9.17 (s, 1H), 8.08 (d, *J* = 7.7 Hz, 2H), 7.45 (t, *J* = 7.4 Hz, 2H), 7.34–7.26 (m, 4H), 4.50 (s, 2H), 3.03 (t, *J* = 4.5 Hz, 4H), 2.73 (t, *J* = 4.5 Hz, 4H) ppm.

**<sup>13</sup>C NMR** (125 MHz, CDCl<sub>3</sub>): δ = 138.5, 138.2, 126.6, 124.2, 121.5, 120.7, 111.8, 65.9, 50.9, 45.4 ppm.

**HRMS** (*m/z*): [M+H]<sup>+</sup> calcd for C<sub>18</sub>H<sub>20</sub>N<sub>3</sub>O<sub>4</sub>S<sup>+</sup> 374.1169, found 374.1170.

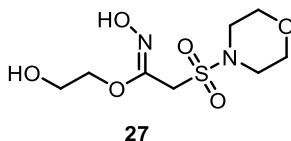

**2-hydroxyethyl (Z)-N-hydroxy-2-(morpholinosulfonyl)acetimidate:** This compound was prepared by using the general procedure (eluent: DCM/MeOH, 40/1, v/v). The product **27** (23.6 mg, 44% yield) was obtained as a colorless oil.

**<sup>1</sup>H NMR** (500 MHz, CDCl<sub>3</sub>): δ = 8.11 (s, 1H), 4.20–4.18 (m, 2H), 4.15 (s, 2H), 3.85–3.83 (m, 2H), 3.75–3.73 (m, 4H), 3.36–3.34 (m, 4H) ppm.

**<sup>13</sup>C NMR** (125 MHz, CDCl<sub>3</sub>): δ = 155.2, 69.6, 66.8, 60.9, 46.0, 45.6 ppm.

**HRMS** (*m/z*): [M+H]<sup>+</sup> calcd for C<sub>8</sub>H<sub>17</sub>N<sub>2</sub>O<sub>6</sub>S<sup>+</sup> 269.0802, found 269.0820.

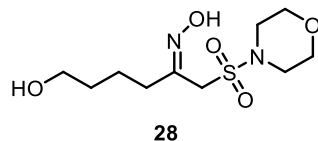

**(Z)-6-hydroxy-1-(morpholinosulfonyl)hexan-2-one oxime:** This compound was prepared by using the general procedure (eluent: PE/EtOAc, 1/3, v/v). The product **28** (25.2 mg, 45% yield, *Z/E* = 1.3:1) was obtained as a white powder.

**<sup>1</sup>H NMR** (500 MHz, DMSO-*d*<sub>6</sub>): δ = 11.42 and 11.21 (s, 1H), 4.41–4.38 (m, 1H), 4.13 and 3.97 (s, 2H), 3.62–3.60 (m, 4H), 3.40–3.36 (m, 2H), 3.20–3.15 (m, 4H), 2.40–2.34 (m, 2H), 1.56–1.36 (m, 4H) ppm.

**<sup>13</sup>C NMR** (125 MHz, DMSO-*d*<sub>6</sub>): δ = 150.6, 147.9, 65.9, 60.5, 52.6, 45.7, 45.3, 44.9, 33.0, 32.6, 32.1, 27.2, 22.0, 21.3 ppm.

**HRMS** (*m/z*): [M+H]<sup>+</sup> calcd for C<sub>10</sub>H<sub>21</sub>N<sub>2</sub>O<sub>5</sub>S<sup>+</sup> 281.1166, found 281.1171.

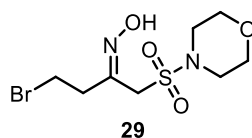

**(Z)-4-bromo-1-(morpholinosulfonyl)butan-2-one oxime:** This compound was prepared by using the general procedure (eluent: PE/EtOAc, 2/1, v/v). The product **29** (25.7 mg, 41% yield, *Z/E* = 4.4:1) was obtained as a yellow powder.

**<sup>1</sup>H NMR** (500 MHz, CDCl<sub>3</sub>): δ = 9.22 (s, 1H), 4.42–4.38 (m, 2H), 4.08 and 4.06 (s, 2H), 3.75–3.69 (m, 4H), 3.33–3.28 (m, 4H), 3.17–3.03 (m, 2H) ppm.

**<sup>13</sup>C NMR** (125 MHz, CDCl<sub>3</sub>): δ = 150.1, 147.6, 69.9, 66.6, 66.5, 48.2, 46.1, 45.9, 45.5, 36.7, 36.5, 28.1 ppm.

**HRMS** (*m/z*): [M+H]<sup>+</sup> calcd for C<sub>8</sub>H<sub>16</sub>BrN<sub>2</sub>O<sub>4</sub>S<sup>+</sup> 315.0009, found 315.0015.

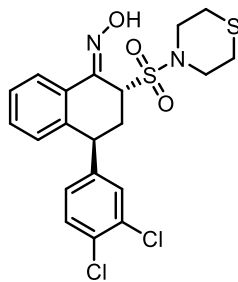

30

**(2*R*,4*S*,*Z*)-4-(3,4-dichlorophenyl)-2-(thiomorpholinofonyl)-3,4-dihydronaphthalen-1(2*H*)-one**

**oxime:** This compound was prepared by using the general procedure (eluent: PE/EtOAc, 2/1, v/v). The product **30** (69.6 mg, 74% yield) was obtained as a yellowish powder.

**<sup>1</sup>H NMR** (500 MHz, DMSO-*d*<sub>6</sub>):  $\delta$  = 12.41 (s, 1H), 7.89–7.87 (m, 1H), 7.57 (d, *J* = 8.3 Hz, 1H), 7.51 (d, *J* = 2.1 Hz, 1H), 7.24–7.19 (m, 3H), 6.68–6.67 (m, 1H), 5.10 (dd, *J* = 5.1, 2.5 Hz, 1H), 4.52 (dd, *J* = 12.3, 5.5 Hz, 1H), 3.46–3.45 (m, 4H), 2.61–2.57 (m, 5H), 2.39–2.33 (m, 1H) ppm.

**<sup>13</sup>C NMR** (125 MHz, DMSO-*d*<sub>6</sub>):  $\delta$  = 146.2, 146.0, 139.4, 131.3, 130.9, 130.1, 129.5, 129.3, 129.2, 126.7, 123.8, 51.7, 47.1, 40.8, 32.5, 27.2 ppm.

**HRMS** (*m/z*): [M+H]<sup>+</sup> calcd for C<sub>20</sub>H<sub>21</sub>Cl<sub>2</sub>N<sub>2</sub>O<sub>3</sub>S<sub>2</sub><sup>+</sup> 471.0365, found 471.0370.

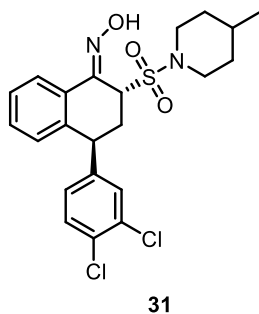

**(2*R*,4*S*,*Z*)-4-(3,4-dichlorophenyl)-2-((4-methylpiperidin-1-yl)sulfonyl)-3,4-dihydronaphthalen-**

**1(2*H*)-one oxime:** This compound was prepared by using the general procedure (eluent: PE/EtOAc, 2/1, v/v). The product **31** (73.6 mg, 79% yield, dr = 1.8:1) was obtained as a yellowish powder.

**<sup>1</sup>H NMR** (500 MHz, DMSO-*d*<sub>6</sub>): δ = 12.32 and 11.92 (s, 1H), 8.40–6.66 (m, 7H), 5.10–4.32 (m, 2H), 3.63–3.42 (m, 2H), 3.00–2.79 (m, 2H), 2.61–2.31 (m, 2H), 1.66–1.56 (m, 2H), 1.45–1.39 (m, 1H), 1.12–1.00 (m, 2H), 0.90–0.88 (m, 3H) ppm.

**<sup>13</sup>C NMR** (125 MHz, DMSO-*d*<sub>6</sub>): δ = 146.8, 146.7, 145.9, 144.3, 140.5, 139.8, 131.8, 131.6, 131.3, 131.3, 131.1, 130.7, 130.2, 129.9, 129.8, 129.7, 129.6, 129.6, 129.5, 129.1, 128.1, 127.1, 126.8, 124.2, 61.0, 51.7, 46.8, 45.9, 45.6, 45.3, 42.0, 41.2, 34.3, 34.1, 33.9, 33.9, 33.1, 32.1, 30.4, 30.2, 21.9, 21.8 ppm.

**HRMS** (*m/z*): [M+H]<sup>+</sup> calcd for C<sub>22</sub>H<sub>25</sub>Cl<sub>2</sub>N<sub>2</sub>O<sub>3</sub>S<sup>+</sup> 467.0957, found 467.0966.



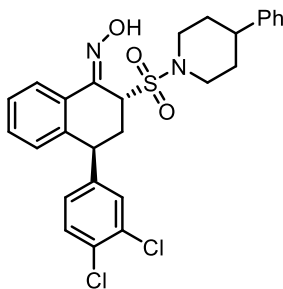

32

**(2R,4S,Z)-4-(3,4-dichlorophenyl)-2-((4-phenylpiperidin-1-yl)sulfonyl)-3,4-dihydronaphthalen-**

**1(2H)-one oxime:** This compound was prepared by using the general procedure (eluent: PE/EtOAc, 2/1, v/v). The product **32** (81.3 mg, 77% yield, dr = 4.5:1) was obtained as a yellowish powder.

**<sup>1</sup>H NMR** (500 MHz, DMSO-*d*<sub>6</sub>):  $\delta$  = 12.38 and 11.99 (s, 1H), 8.44–6.68 (m, 12H), 5.17–3.56 (m, 4H), 3.18–2.93 (m, 2H), 2.65–2.33 (m, 3H), 1.86–1.75 (m, 2H), 1.65–1.49 (m, 2H) ppm.

**<sup>13</sup>C NMR** (125 MHz, DMSO-*d*<sub>6</sub>):  $\delta$  = 146.4, 146.3, 145.5, 145.3, 145.3, 143.9, 140.1, 139.4, 131.3, 131.2, 130.8, 130.8, 130.7, 130.3, 130.3, 129.8, 129.5, 129.3, 129.3, 129.2, 129.1, 129.0, 128.7, 128.4, 127.7, 126.8, 126.7, 126.7, 126.3, 123.8, 66.4, 60.8, 51.5, 48.6, 46.9, 45.9, 45.8, 45.4, 41.5, 41.5, 41.3, 40.8, 33.2, 32.9, 32.7, 32.7, 31.6 ppm.

**HRMS** (*m/z*): [M+H]<sup>+</sup> calcd for C<sub>27</sub>H<sub>27</sub>Cl<sub>2</sub>N<sub>2</sub>O<sub>3</sub>S<sup>+</sup> 529.1114, found 529.1115.

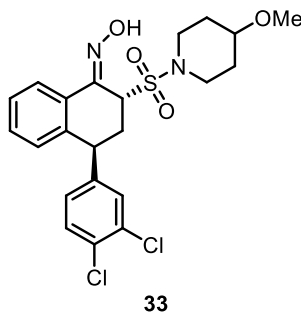

**(2*R*,4*S*,*Z*)-4-(3,4-dichlorophenyl)-2-((4-methoxypiperidin-1-yl)sulfonyl)-3,4-dihydronaphthalen-**

**1(2*H*)-one oxime:** This compound was prepared by using the general procedure (eluent: PE/EtOAc, 1/1, v/v). The product **33** (68.4 mg, 71% yield, dr = 1.3:1) was obtained as a yellowish powder.

**<sup>1</sup>H NMR** (500 MHz, DMSO-*d*<sub>6</sub>): δ = 12.31 and 11.94 (s, 1H), 8.40–6.66 (m, 7H), 5.12–4.32 (m, 2H), 3.47–3.05 (m, 8H), 2.61–2.31 (m, 2H), 1.83–1.78 (m, 2H), 1.48–1.42 (m, 2H) ppm.

**<sup>13</sup>C NMR** (125 MHz, DMSO-*d*<sub>6</sub>): δ = 146.3, 146.2, 145.4, 143.9, 140.1, 139.4, 131.3, 131.2, 130.9, 130.8, 130.7, 130.2, 129.8, 129.5, 129.3, 129.2, 129.1, 129.0, 128.7, 127.6, 126.7, 126.3, 123.8, 74.3, 66.4, 60.7, 55.1, 54.9, 51.5, 43.2, 43.0, 42.5, 42.4, 41.5, 40.7, 34.2, 33.9, 32.6, 31.6, 30.4, 30.3 ppm.

**HRMS** (*m/z*): [M+H]<sup>+</sup> calcd for C<sub>22</sub>H<sub>25</sub>Cl<sub>2</sub>N<sub>2</sub>O<sub>4</sub>S<sup>+</sup> 483.0907, found 483.0915.

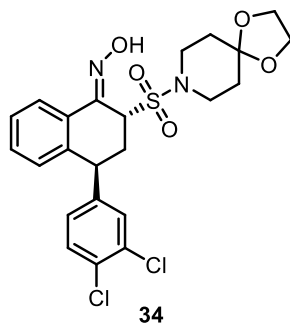

**(2*R*,4*S*,*Z*)-2-((1,4-dioxo-8-azaspiro[4.5]decan-8-yl)sulfonyl)-4-(3,4-dichlorophenyl)-3,4-**

**dihydronaphthalen-1(2*H*)-one oxime:** This compound was prepared by using the general procedure (eluent: PE/EtOAc, 1/1, v/v). The product **34** (61.2 mg, 60% yield, dr = 3.4:1) was obtained as a yellowish powder.

**<sup>1</sup>H NMR** (500 MHz, DMSO-*d*<sub>6</sub>): δ = 12.34 and 11.97 (s, 1H), 8.39–6.66 (m, 7H), 5.13–4.34 (m, 2H), 3.89 (s, 4H), 3.37–3.26 (m, 4H), 2.61–2.32 (m, 2H), 1.64–1.60 (m, 4H) ppm.

**<sup>13</sup>C NMR** (125 MHz, DMSO-*d*<sub>6</sub>): δ = 146.3, 146.1, 145.5, 143.9, 140.0, 139.3, 131.3, 131.2, 130.9, 130.8, 130.7, 130.3, 130.2, 129.8, 129.5, 129.3, 129.3, 129.2, 129.2, 129.1, 129.0, 128.7, 127.6, 126.7, 126.3, 123.8, 105.8, 63.8, 61.0, 51.8, 44.1, 43.4, 41.5, 40.7, 34.9, 34.9, 32.6, 31.7 ppm.

**HRMS** (*m/z*): [M+H]<sup>+</sup> calcd for C<sub>23</sub>H<sub>25</sub>Cl<sub>2</sub>N<sub>2</sub>O<sub>5</sub>S<sup>+</sup> 511.0856, found 511.0859.

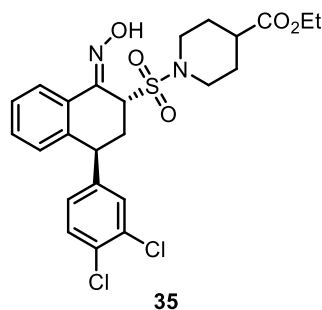

**ethyl 1-(((2R,4S,Z)-4-(3,4-dichlorophenyl)-1-(hydroxyimino)-1,2,3,4-tetrahydronaphthalen-2-yl)sulfonyl)piperidine-4-carboxylate:** This compound was prepared by using the general procedure (eluent: PE/EtOAc, 1/1, v/v). The product **35** (87.0 mg, 83% yield, dr = 1:1) was obtained as a yellowish powder.

**<sup>1</sup>H NMR** (500 MHz, DMSO-*d*<sub>6</sub>):  $\delta$  = 12.30 and 11.93 (s, 1H), 8.40–6.67 (m, 7H), 5.13–4.33 (m, 2H), 4.07 (q, *J* = 7.1 Hz, 2H), 3.62–3.43 (m, 2H), 3.17–2.32 (m, 5H), 1.90–1.82 (m, 2H), 1.57–1.43 (m, 2H), 1.18 (t, *J* = 7.1 Hz, 3H) ppm.

**<sup>13</sup>C NMR** (125 MHz, DMSO-*d*<sub>6</sub>):  $\delta$  = 173.6, 146.3, 145.4, 143.8, 140.1, 139.4, 131.3, 131.2, 130.9, 130.7, 130.3, 130.3, 130.2, 129.8, 129.5, 129.3, 129.3, 129.3, 129.1, 129.0, 128.7, 127.6, 126.7, 126.4, 123.8, 60.7, 60.1, 51.5, 48.6, 45.4, 44.7, 44.4, 44.1, 41.5, 40.7, 32.6, 31.5, 28.1, 27.9, 27.8, 27.8, 14.1 ppm.

**HRMS** (*m/z*): [M+H]<sup>+</sup> calcd for C<sub>24</sub>H<sub>27</sub>Cl<sub>2</sub>N<sub>2</sub>O<sub>5</sub>S<sup>+</sup> 525.1012, found 525.1015.

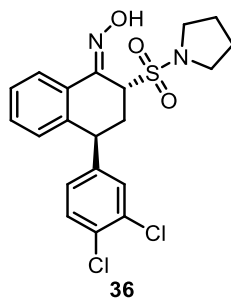

**(2*R*,4*S*,*Z*)-4-(3,4-dichlorophenyl)-2-(pyrrolidin-1-ylsulfonyl)-3,4-dihydronaphthalen-1(2*H*)-one**

**oxime:** This compound was prepared by using the general procedure (eluent: PE/EtOAc, 2/1, v/v). The product **36** (56.9 mg, 65% yield, dr = 6.7:1) was obtained as a yellowish powder.

**<sup>1</sup>H NMR** (500 MHz, DMSO-*d*<sub>6</sub>):  $\delta$  = 12.25 and 11.89 (s, 1H), 8.42–6.66 (m, 7H), 5.26–4.17 (m, 2H), 3.35–3.18 (m, 4H), 2.61–2.56 (m, 1H), 2.38–2.31 (m, 1H), 1.88–1.82 (m, 4H) ppm.

**<sup>13</sup>C NMR** (125 MHz, DMSO-*d*<sub>6</sub>):  $\delta$  = 146.8, 146.3, 145.3, 144.0, 140.2, 139.5, 131.4, 131.2, 130.9, 130.8, 130.7, 130.3, 130.2, 129.8, 129.5, 129.3, 129.2, 129.2, 129.0, 128.7, 127.8, 126.7, 126.4, 123.7, 58.8, 50.4, 49.3, 48.1, 47.9, 47.9, 45.2, 41.6, 40.8, 32.7, 31.2, 25.4, 23.5, 22.1 ppm.

**HRMS** (*m/z*): [M+H]<sup>+</sup> calcd for C<sub>20</sub>H<sub>21</sub>Cl<sub>2</sub>N<sub>2</sub>O<sub>3</sub>S<sup>+</sup> 439.0644, found 439.0654.

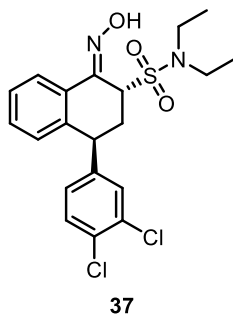

**(2*R*,4*S*,*Z*)-4-(3,4-dichlorophenyl)-*N,N*-diethyl-1-(hydroxyimino)-1,2,3,4-tetrahydronaphthalene-2-**

**sulfonamide:** This compound was prepared by using the general procedure (eluent: PE/EtOAc, 2/1, v/v).

The product **37** (47.5 mg, 54% yield, dr = 1.3:1) was obtained as a yellowish powder.

**<sup>1</sup>H NMR** (500 MHz, DMSO-*d*<sub>6</sub>): δ = 12.15 and 11.88 (s, 1H), 8.39–6.66 (m, 7H), 5.21–4.11 (m, 2H), 3.20–3.16 (m, 4H), 2.60–2.31 (m, 2H), 1.12–1.08 (m, 6H) ppm.

**<sup>13</sup>C NMR** (125 MHz, DMSO-*d*<sub>6</sub>): δ = 146.4, 146.3, 145.4, 143.8, 140.1, 139.5, 131.3, 131.2, 130.9, 130.8, 130.7, 130.3, 130.3, 129.7, 129.5, 129.4, 129.2, 129.2, 129.1, 129.0, 128.7, 127.7, 126.7, 126.4, 123.7, 60.6, 51.7, 43.5, 42.9, 41.6, 40.8, 32.6, 31.4, 15.8, 15.3 ppm.

**HRMS** (*m/z*): [M+H]<sup>+</sup> calcd for C<sub>20</sub>H<sub>23</sub>Cl<sub>2</sub>N<sub>2</sub>O<sub>3</sub>S<sup>+</sup> 441.0801, found 441.0795.

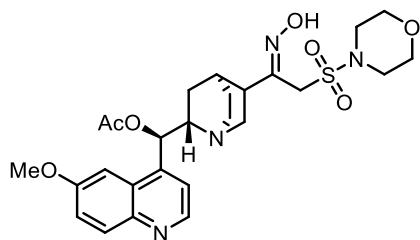

38

**(1*R*)-((1*S*,2*S*,4*S*)-5-((*Z*)-1-(hydroxyimino)-2-(morpholinyl)ethyl)quinuclidin-2-yl)(6-**

**methoxyquinolin-4-yl)methyl acetate:** This compound was prepared by using the general procedure (eluent: DCM/MeOH, 30/1, v/v). The product **38** (54.6 mg, 50% yield) was obtained as a white powder.

**<sup>1</sup>H NMR** (500 MHz, CD<sub>3</sub>CN):  $\delta$  = 11.72 (s, 1H), 8.61 (d,  $J$  = 4.5 Hz, 1H), 7.96 (d,  $J$  = 9.2 Hz, 1H), 7.49 (d,  $J$  = 2.8 Hz, 1H), 7.35–7.32 (m, 2H), 6.36 (d,  $J$  = 8.0 Hz, 1H), 4.37 (d,  $J$  = 13.6 Hz, 1H), 3.90 (s, 3H), 3.74 (d,  $J$  = 13.6 Hz, 1H), 3.62–3.52 (m, 5H), 3.25–3.12 (m, 6H), 2.82–2.72 (m, 2H), 2.63–2.58 (m, 1H), 2.21–2.16 (m, 1H), 2.05 (s, 3H), 1.81–1.74 (m, 2H), 1.57–1.49 (m, 2H) ppm.

**<sup>13</sup>C NMR** (125 MHz, CD<sub>3</sub>CN):  $\delta$  = 171.0, 158.8, 150.8, 148.2, 146.4, 144.7, 131.8, 128.2, 122.9, 119.8, 102.7, 74.0, 67.1, 59.8, 56.4, 52.9, 46.3, 45.9, 43.2, 40.9, 27.9, 25.7, 25.4, 21.1 ppm.

**HRMS** ( $m/z$ ): [M+H]<sup>+</sup> calcd for C<sub>26</sub>H<sub>35</sub>N<sub>4</sub>O<sub>7</sub>S<sup>+</sup> 547.2221, found 547.2230.

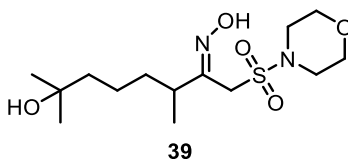

**(Z)-7-hydroxy-3,7-dimethyl-1-(morpholinosulfonyl)octan-2-one oxime:** This compound was prepared by using the general procedure (eluent: PE/EtOAc, 1/2, v/v). The product **39** (20.8 mg, 31% yield) was obtained as a colorless oil.

**<sup>1</sup>H NMR** (500 MHz, CDCl<sub>3</sub>):  $\delta$  = 9.16 (s, 1H), 4.13–4.04 (m, 2H), 3.74–3.72 (m, 4H), 3.34–3.32 (m, 4H), 2.80–2.76 (m, 1H), 1.46–1.38 (m, 6H), 1.19 (s, 6H), 1.14 (d,  $J$  = 6.9 Hz, 3H) ppm.

**<sup>13</sup>C NMR** (125 MHz, CDCl<sub>3</sub>):  $\delta$  = 154.3, 71.2, 66.8, 45.8, 45.6, 43.6, 38.0, 34.6, 29.5, 29.3, 21.7, 18.4 ppm.

**HRMS** ( $m/z$ ): [M+H]<sup>+</sup> calcd for C<sub>14</sub>H<sub>29</sub>N<sub>2</sub>O<sub>5</sub>S<sup>+</sup> 337.1792, found 337.1790.

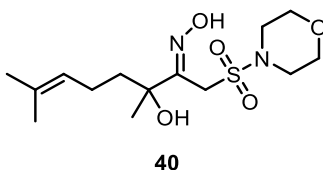

**(Z)-3-hydroxy-3,7-dimethyl-1-(morpholinosulfonyl)oct-6-en-2-one oxime:** This compound was prepared by using the general procedure (eluent: PE/EtOAc, 2/1, v/v). The product **40** (19.4 mg, 29% yield) was obtained as a white powder.

**<sup>1</sup>H NMR** (500 MHz, CDCl<sub>3</sub>):  $\delta$  = 4.95–4.94 (m, 1H), 4.74 (s, 1H), 3.76 (t,  $J$  = 4.7 Hz, 4H), 3.27–3.20 (m, 5H), 2.95 (s, 1H), 2.69–2.62 (m, 2H), 2.54–2.50 (m, 1H), 1.89–1.85 (m, 1H), 1.76 (s, 3H), 1.69–1.63 (m, 3H), 1.48 (s, 3H) ppm.

**<sup>13</sup>C NMR** (125 MHz, CDCl<sub>3</sub>):  $\delta$  = 144.8, 112.7, 79.1, 66.5, 50.6, 46.0, 45.5, 44.2, 39.6, 32.1, 26.8, 23.0 ppm.

**HRMS** ( $m/z$ ): [M+H]<sup>+</sup> calcd for C<sub>14</sub>H<sub>27</sub>N<sub>2</sub>O<sub>5</sub>S<sup>+</sup> 335.1635, found 335.1640.



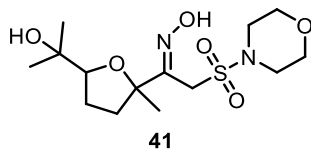

**(Z)-1-(5-(2-hydroxypropan-2-yl)-2-methyltetrahydrofuran-2-yl)-2-(morpholinosulfonyl)ethan-1-**

**one oxime:** This compound was prepared by using the general procedure (eluent: PE/EtOAc, 1/2, v/v).

The product **41** (25.9 mg, 37% yield, *Z/E* = 1.2:1) was obtained as a yellowish powder.

**<sup>1</sup>H NMR** (500 MHz, CDCl<sub>3</sub>): δ = 10.94 and 9.67 (brs, 1H), 4.24–3.29 (m, 12H), 2.44–2.30 (m, 1H), 2.02–1.81 (m, 3H), 1.48–1.08 (m, 9H) ppm.

**<sup>13</sup>C NMR** (125 MHz, CDCl<sub>3</sub>): δ = 154.4, 153.7, 87.0, 86.2, 84.0, 83.9, 71.6, 71.1, 66.7, 66.0, 45.7, 45.6, 45.2, 44.0, 37.6, 36.8, 28.3, 27.3, 27.2, 26.4, 26.2, 25.5, 25.1, 24.1 ppm.

**HRMS** (*m/z*): [M+H]<sup>+</sup> calcd for C<sub>14</sub>H<sub>27</sub>N<sub>2</sub>O<sub>6</sub>S<sup>+</sup> 351.1584, found 351.1592.

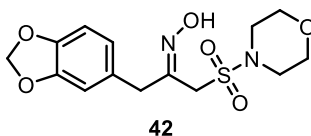

**(Z)-1-(benzo[*d*][1,3]dioxol-5-yl)-3-(morpholinosulfonyl)propan-2-one oxime:** This compound was prepared by using the general procedure (eluent: PE/EtOAc, 2/1, v/v). The product **42** (39.0 mg, 57% yield, *Z/E* = 2:1) was obtained as a white powder.

**<sup>1</sup>H NMR** (500 MHz, DMSO-*d*<sub>6</sub>): δ = 11.68 and 11.58 (s, 1H), 6.86–6.66 (m, 3H), 5.98 and 5.97 (m, 2H), 3.97–3.61 (m, 8H), 3.20–3.17 (m, 4H) ppm.

**<sup>13</sup>C NMR** (125 MHz, DMSO-*d*<sub>6</sub>): δ = 148.6, 147.4, 147.4, 146.1, 145.9, 130.2, 129.6, 122.2, 122.1, 109.4, 109.3, 108.4, 100.9, 100.9, 65.9, 51.9, 45.6, 45.2, 44.2, 38.9, 32.5 ppm.

**HRMS** (*m/z*): [M+H]<sup>+</sup> calcd for C<sub>14</sub>H<sub>19</sub>N<sub>2</sub>O<sub>6</sub>S<sup>+</sup> 343.0958, found 343.0962.

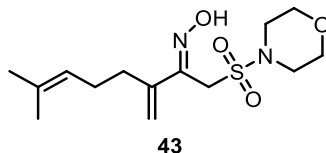

**(Z)-7-methyl-3-methylene-1-(morpholinylsulfonyl)oct-6-en-2-one oxime:** This compound was prepared by using the general procedure (eluent: PE/EtOAc, 3/1, v/v). The product **43** (34.8 mg, 55% yield) was obtained as a colorless oil.

**<sup>1</sup>H NMR** (500 MHz, CDCl<sub>3</sub>): δ = 8.38 (brs, 1H), 8.04 (d, *J* = 10.2 Hz, 1H), 6.18 (d, *J* = 10.2 Hz, 1H), 5.08–5.05 (m, 1H), 3.74–3.72 (m, 6H), 3.30 (t, *J* = 4.7 Hz, 4H), 2.49 (t, *J* = 7.5 Hz, 2H), 2.15 (q, *J* = 7.5 Hz, 2H), 1.67 (s, 3H), 1.59 (s, 3H) ppm.

**<sup>13</sup>C NMR** (125 MHz, CDCl<sub>3</sub>): δ = 147.7, 137.7, 133.8, 127.2, 122.4, 66.8, 57.2, 46.4, 46.3, 30.9, 27.1, 25.8, 17.9 ppm.

**HRMS** (*m/z*): [M+H]<sup>+</sup> calcd for C<sub>14</sub>H<sub>25</sub>N<sub>2</sub>O<sub>4</sub>S<sup>+</sup> 317.1530, found 317.1536.

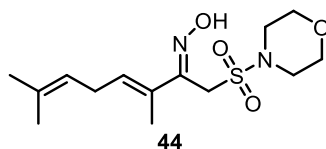

**(2Z,3E)-3,7-dimethyl-1-(morpholinylsulfonyl)octa-3,6-dien-2-one oxime:** This compound was prepared by using the general procedure (eluent: PE/EtOAc, 3/1, v/v). The product **44** (27.8 mg, 44% yield, *Z/E* = 1.2:1) was obtained as a colorless oil.

**<sup>1</sup>H NMR** (500 MHz, CDCl<sub>3</sub>): δ = 8.69 and 8.46 (brs, 1H), 8.09–6.15 (m, 2H), 4.88–4.85 (m, 1H), 3.71–3.60 (m, 5H), 3.37–3.27 (m, 4H), 2.80–2.58 (m, 2H), 1.98–1.64 (m, 9H) ppm.

**<sup>13</sup>C NMR** (125 MHz, CDCl<sub>3</sub>): δ = 147.8, 140.2, 138.1, 135.7, 135.7, 126.2, 118.1, 71.3, 71.0, 67.1, 67.0, 46.6, 46.5, 26.5, 26.4, 25.9, 18.2, 14.8, 14.7 ppm.

**HRMS** (*m/z*): [M+H]<sup>+</sup> calcd for C<sub>14</sub>H<sub>25</sub>N<sub>2</sub>O<sub>4</sub>S<sup>+</sup> 317.1530, found 317.1520.

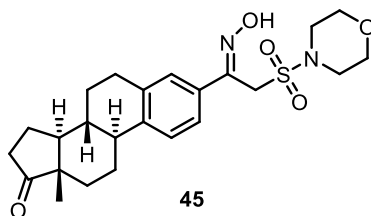

**(8*R*,9*S*,13*S*,14*S*)-3-((*Z*)-1-(hydroxyimino)-2-(morpholinosulfonyl)ethyl)-13-methyl-**

**6,7,8,9,11,12,13,14,15,16-decahydro-17*H*-cyclopenta[*a*]phenanthren-17-one:** This compound was prepared by using the general procedure (eluent: PE/EtOAc, 2/1, v/v). The product **45** (66.2 mg, 72% yield) was obtained as a white powder.

**<sup>1</sup>H NMR** (500 MHz, CD<sub>3</sub>CN):  $\delta$  = 9.84 (s, 1H), 7.46–7.43 (m, 2H), 7.31 (d,  $J$  = 8.1 Hz, 1H), 4.53 (s, 2H), 3.62–3.61 (m, 4H), 3.22–3.20 (m, 4H), 2.91–2.88 (m, 2H), 2.46–2.37 (m, 2H), 2.29–2.24 (m, 1H), 2.10–1.98 (m, 3H), 1.86–1.83 (m, 1H), 1.64–1.39 (m, 6H), 0.86 (m, 3H) ppm.

**<sup>13</sup>C NMR** (125 MHz, CD<sub>3</sub>CN):  $\delta$  = 148.6, 142.6, 137.8, 132.9, 127.9, 126.4, 124.9, 67.2, 51.1, 48.6, 46.5, 45.2, 45.1, 38.7, 36.3, 32.4, 30.0, 27.0, 26.4, 22.1, 14.2 ppm.

**HRMS** ( $m/z$ ): [M+H]<sup>+</sup> calcd for C<sub>24</sub>H<sub>33</sub>N<sub>2</sub>O<sub>5</sub>S<sup>+</sup> 461.2105, found 461.2104.

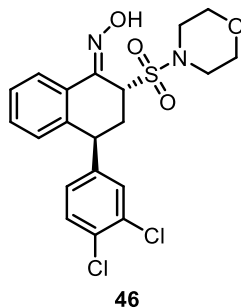

**(2*R*,4*S*,*Z*)-4-(3,4-dichlorophenyl)-2-(morpholinofonyl)-3,4-dihydronaphthalen-1(2*H*)-one oxime:**

This compound was prepared by using the general procedure (eluent: PE/EtOAc, 2/1, v/v). The product **46** (68.1 mg, 75% yield, dr = 2.8:1) was obtained as a yellowish powder.

**<sup>1</sup>H NMR** (500 MHz, DMSO-*d*<sub>6</sub>):  $\delta$  = 12.44 and 12.02 (s, 1H), 8.42–6.67 (m, 7H), 5.14–5.13 (m, 1H), 4.55–4.42 (m, 1H), 3.60–3.57 (m, 4H), 3.27–3.22 (m, 4H), 2.63–2.59 (m, 1H), 2.42–2.35 (m, 1H) ppm.

**<sup>13</sup>C NMR** (125 MHz, DMSO-*d*<sub>6</sub>):  $\delta$  = 146.3, 146.2, 145.3, 143.7, 140.1, 139.4, 131.3, 131.2, 130.9, 130.7, 130.3, 130.1, 129.9, 129.5, 129.4, 129.3, 129.2, 128.7, 127.6, 126.7, 126.4, 123.8, 66.1, 60.3, 51.0, 46.0, 45.1, 41.5, 40.8, 32.7, 31.5 ppm.

**HRMS** (*m/z*): [M+H]<sup>+</sup> calcd for C<sub>20</sub>H<sub>21</sub>Cl<sub>2</sub>N<sub>2</sub>O<sub>4</sub>S<sup>+</sup> 455.0594, found 455.0607.

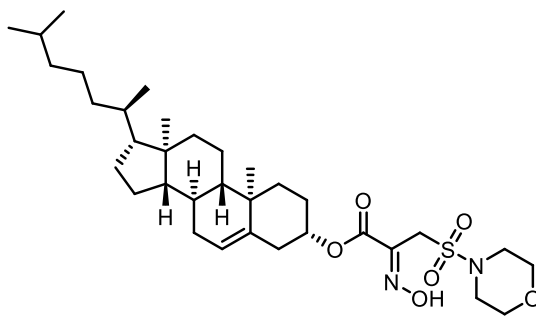

47

**(3*S*,8*S*,9*S*,10*R*,13*R*,14*S*,17*R*)-10,13-dimethyl-17-((*R*)-6-methylheptan-2-yl)-**

**2,3,4,7,8,9,10,11,12,13,14,15,16,17-tetradecahydro-1*H*-cyclopenta[*a*]phenanthren-3-yl (Z)-2-**

**(hydroxyimino)-3-(morpholinosulfonyl)propanoate:** This compound was prepared by using the general procedure (eluent: PE/EtOAc, 2/1, v/v). The product **47** (74.4 mg, 60% yield) was obtained as a white powder.

**<sup>1</sup>H NMR** (500 MHz, DMSO-*d*<sub>6</sub>:CDCl<sub>3</sub> = 2:1):  $\delta$  = 13.21 (s, 1H), 5.35–5.34 (m, 1H), 4.64–4.62 (m, 1H), 4.30 (s, 2H), 3.62–3.60 (m, 4H), 3.15–3.13 (m, 4H), 2.33 (d, *J* = 8.0 Hz, 2H), 1.98–0.92 (m, 29H), 0.88 (d, *J* = 6.4 Hz, 3H), 0.82 (dd, *J* = 6.6, 2.4 Hz, 6H), 0.64 (s, 3H) ppm.

**<sup>13</sup>C NMR** (125 MHz, DMSO-*d*<sub>6</sub>:CDCl<sub>3</sub> = 2:1):  $\delta$  = 161.7, 141.0, 138.9, 122.4, 74.9, 65.8, 56.1, 55.5, 49.4, 45.0, 43.0, 41.8, 38.9, 37.4, 36.4, 36.0, 35.6, 35.2, 31.3, 31.3, 27.7, 27.4, 27.2, 23.8, 23.2, 22.6, 22.3, 20.5, 18.9, 18.4, 11.5 ppm.

**HRMS** (*m/z*): [M+H]<sup>+</sup> calcd for C<sub>34</sub>H<sub>57</sub>N<sub>2</sub>O<sub>6</sub>S<sup>+</sup> 621.3932, found 621.3940.

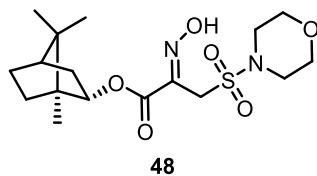

**(1S,2S,4S)-1,7,7-trimethylbicyclo[2.2.1]heptan-2-yl**

**(Z)-2-(hydroxyimino)-3-**

**(morpholinosulfonyl)propanoate:** This compound was prepared by using the general procedure (eluent: PE/EtOAc, 1/1, v/v). The product **48** (56.7 mg, 73% yield) was obtained as a white powder.

**<sup>1</sup>H NMR** (500 MHz, CDCl<sub>3</sub>):  $\delta$  = 11.39 (s, 1H), 4.86 (dd,  $J$  = 7.6, 3.9 Hz, 1H), 4.40–4.30 (m, 2H), 3.75–3.73 (m, 4H), 3.31–3.29 (m, 4H), 1.92–1.67 (m, 4H), 1.60–1.54 (m, 1H), 1.19–1.06 (m, 2H), 1.00 (s, 3H), 0.89 (s, 3H), 0.84 (s, 3H) ppm.

**<sup>13</sup>C NMR** (125 MHz, CDCl<sub>3</sub>):  $\delta$  = 162.1, 143.0, 84.0, 66.9, 49.1, 47.1, 45.4, 45.1, 44.0, 38.6, 33.7, 27.0, 20.1, 20.0, 11.6 ppm.

**HRMS** ( $m/z$ ): [M+H]<sup>+</sup> calcd for C<sub>17</sub>H<sub>29</sub>N<sub>2</sub>O<sub>6</sub>S<sup>+</sup> 389.1741, found 389.1740.

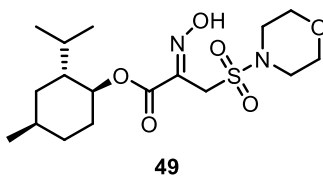

**(1S,2R,4R)-2-isopropyl-4-methylcyclohexyl**

**(Z)-2-(hydroxyimino)-3-**

**(morpholinosulfonyl)propanoate:** This compound was prepared by using the general procedure (eluent: PE/EtOAc, 1/1, v/v). The product **49** (53.1 mg, 68% yield) was obtained as a colorless oil.

**<sup>1</sup>H NMR** (500 MHz, CDCl<sub>3</sub>):  $\delta$  = 11.07 (brs, 1H), 4.92 (td,  $J$  = 10.9, 4.4 Hz, 1H), 4.44–4.35 (m, 2H), 3.76–3.74 (m, 4H), 3.32–3.30 (m, 4H), 2.08–2.04 (m, 1H), 1.93–1.87 (m, 1H), 1.72–1.67 (m, 2H), 1.53–1.46 (m, 2H), 1.14–1.03 (m, 2H), 0.92–0.84 (m, 7H), 0.76 (d,  $J$  = 6.9 Hz, 3H) ppm.

**<sup>13</sup>C NMR** (125 MHz, CDCl<sub>3</sub>):  $\delta$  = 162.2, 142.9, 77.4, 66.8, 46.9, 45.5, 44.0, 40.5, 34.1, 31.5, 26.2, 23.4, 22.1, 20.8, 16.3 ppm.

**HRMS** ( $m/z$ ): [M+H]<sup>+</sup> calcd for C<sub>17</sub>H<sub>31</sub>N<sub>2</sub>O<sub>6</sub>S<sup>+</sup> 391.1897, found 391.1992.

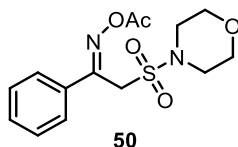

**(Z)-2-(morpholinosulfonyl)-1-phenylethan-1-one O-acetyl oxime:** This compound was prepared by using the general procedure (eluent: PE/EtOAc, 2/1, v/v). The product **50** (62.0 mg, 95% yield, *Z/E* = 7.7:1) was obtained as a white powder.

**<sup>1</sup>H NMR** (500 MHz, CDCl<sub>3</sub>): δ = 7.82–7.43 (m, 5H), 4.58 and 4.35 (s, 2H), 3.67–3.60 (m, 4H), 3.30–3.19 (m, 4H), 2.33 and 2.09 (s, 3H) ppm.

**<sup>13</sup>C NMR** (125 MHz, CDCl<sub>3</sub>): δ = 168.3, 154.3, 132.5, 131.6, 130.7, 129.0, 128.6, 128.2, 127.7, 66.6, 66.5, 55.6, 47.9, 46.1, 45.8, 20.0, 19.5 ppm.

**HRMS** (*m/z*): [M+H]<sup>+</sup> calcd for C<sub>14</sub>H<sub>19</sub>N<sub>2</sub>O<sub>5</sub>S<sup>+</sup> 327.1009, found 327.1012.

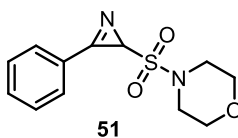

**4-((3-phenyl-2H-azirin-2-yl)sulfonyl)morpholine:** This compound was prepared by using the general procedure (eluent: PE/EtOAc, 3/1, v/v). The product **51** (31.9 mg, 60% yield) was obtained as a white powder.

**<sup>1</sup>H NMR** (500 MHz, CDCl<sub>3</sub>): δ = 7.99–7.97 (m, 2H), 7.72–7.68 (m, 1H), 7.63–7.60 (m, 2H), 3.77 (t, *J* = 4.7 Hz, 4H), 3.57 (s, 1H), 3.53–3.49 (m, 2H), 3.45–3.41 (m, 2H) ppm.

**<sup>13</sup>C NMR** (125 MHz, CDCl<sub>3</sub>): δ = 161.5, 135.0, 131.1, 129.7, 121.4, 66.7, 46.4, 43.3. ppm.

**HRMS** (*m/z*): [M+H]<sup>+</sup> calcd for C<sub>12</sub>H<sub>15</sub>N<sub>2</sub>O<sub>3</sub>S<sup>+</sup> 267.0798, found 267.0780.

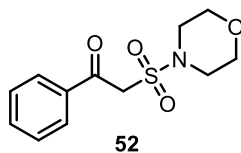

**2-(morpholinylsulfonyl)-1-phenylethan-1-one:** This compound was prepared by using the general procedure (eluent: PE/EtOAc, 3/1, v/v). The product **52** (33.9 mg, 63% yield) was obtained as a white powder.

**<sup>1</sup>H NMR** (500 MHz, CDCl<sub>3</sub>):  $\delta$  = 8.04–8.02 (m, 2H), 7.67–7.63 (m, 1H), 7.52 (t,  $J$  = 7.8 Hz, 2H), 4.58 (s, 2H), 3.73–3.71 (m, 4H), 3.37–3.35 (m, 4H) ppm.

**<sup>13</sup>C NMR** (125 MHz, CDCl<sub>3</sub>):  $\delta$  = 189.2, 135.8, 134.6, 129.5, 129.1, 66.7, 57.4, 46.3 ppm.

**HRMS** ( $m/z$ ): [M+H]<sup>+</sup> calcd for C<sub>12</sub>H<sub>16</sub>NO<sub>4</sub>S<sup>+</sup> 270.0795, found 270.0800.

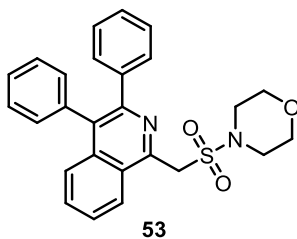

**4-(((3,4-diphenylisoquinolin-1-yl)methyl)sulfonyl)morpholine:** This compound was prepared by using the general procedure (eluent: PE/EtOAc, 3/1, v/v). The product **53** (62.2 mg, 70% yield) was obtained as a yellowish powder.

**<sup>1</sup>H NMR** (500 MHz, CDCl<sub>3</sub>):  $\delta$  = 8.39–8.37 (m, 1H), 7.73–7.63 (m, 3H), 7.40–7.36 (m, 5H), 7.26–7.21 (m, 5H), 5.13 (s, 2H), 3.64–3.63 (m, 4H), 3.28–3.26 (m, 4H) ppm.

**<sup>13</sup>C NMR** (125 MHz, CDCl<sub>3</sub>):  $\delta$  = 149.9, 148.9, 140.2, 136.9, 136.9, 132.0, 131.3, 130.7, 130.2, 128.5, 127.9, 127.7, 127.5, 126.8, 126.5, 126.0, 66.7, 56.8, 46.2 ppm.

**HRMS** ( $m/z$ ): [M+H]<sup>+</sup> calcd for C<sub>26</sub>H<sub>25</sub>N<sub>2</sub>O<sub>3</sub>S<sup>+</sup> 445.1580, found 445.1590.



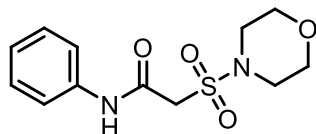

**54**

**2-(morpholinosulfonyl)-N-phenylacetamide:** This compound was prepared by using the general procedure (eluent: PE/EtOAc, 2/1, v/v). The product **54** (47.7 mg, 84% yield) was obtained as a white powder.

**<sup>1</sup>H NMR** (500 MHz, CDCl<sub>3</sub>):  $\delta$  = 10.41 (s, 1H), 7.59–7.57 (m, 2H), 7.36–7.33 (m, 2H), 7.12–7.09 (m, 1H), 4.21 (s, 2H), 3.65–3.63 (m, 4H), 3.26–3.24 (m, 4H) ppm.

**<sup>13</sup>C NMR** (125 MHz, CDCl<sub>3</sub>):  $\delta$  = 160.3, 138.5, 129.0, 124.1, 119.3, 65.9, 55.7, 45.7 ppm.

**HRMS** ( $m/z$ ): [M+Na]<sup>+</sup> calcd for C<sub>12</sub>H<sub>16</sub>N<sub>2</sub>NaO<sub>4</sub>S<sup>+</sup> 307.0723, found 307.0721.

## 9. NMR spectra data.

$^1\text{H}$  NMR (500 MHz,  $\text{CDCl}_3$ ) for **1**

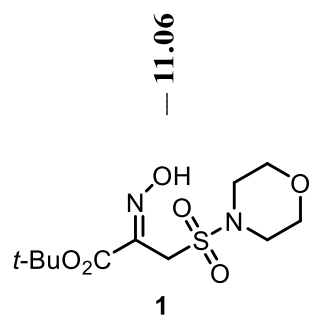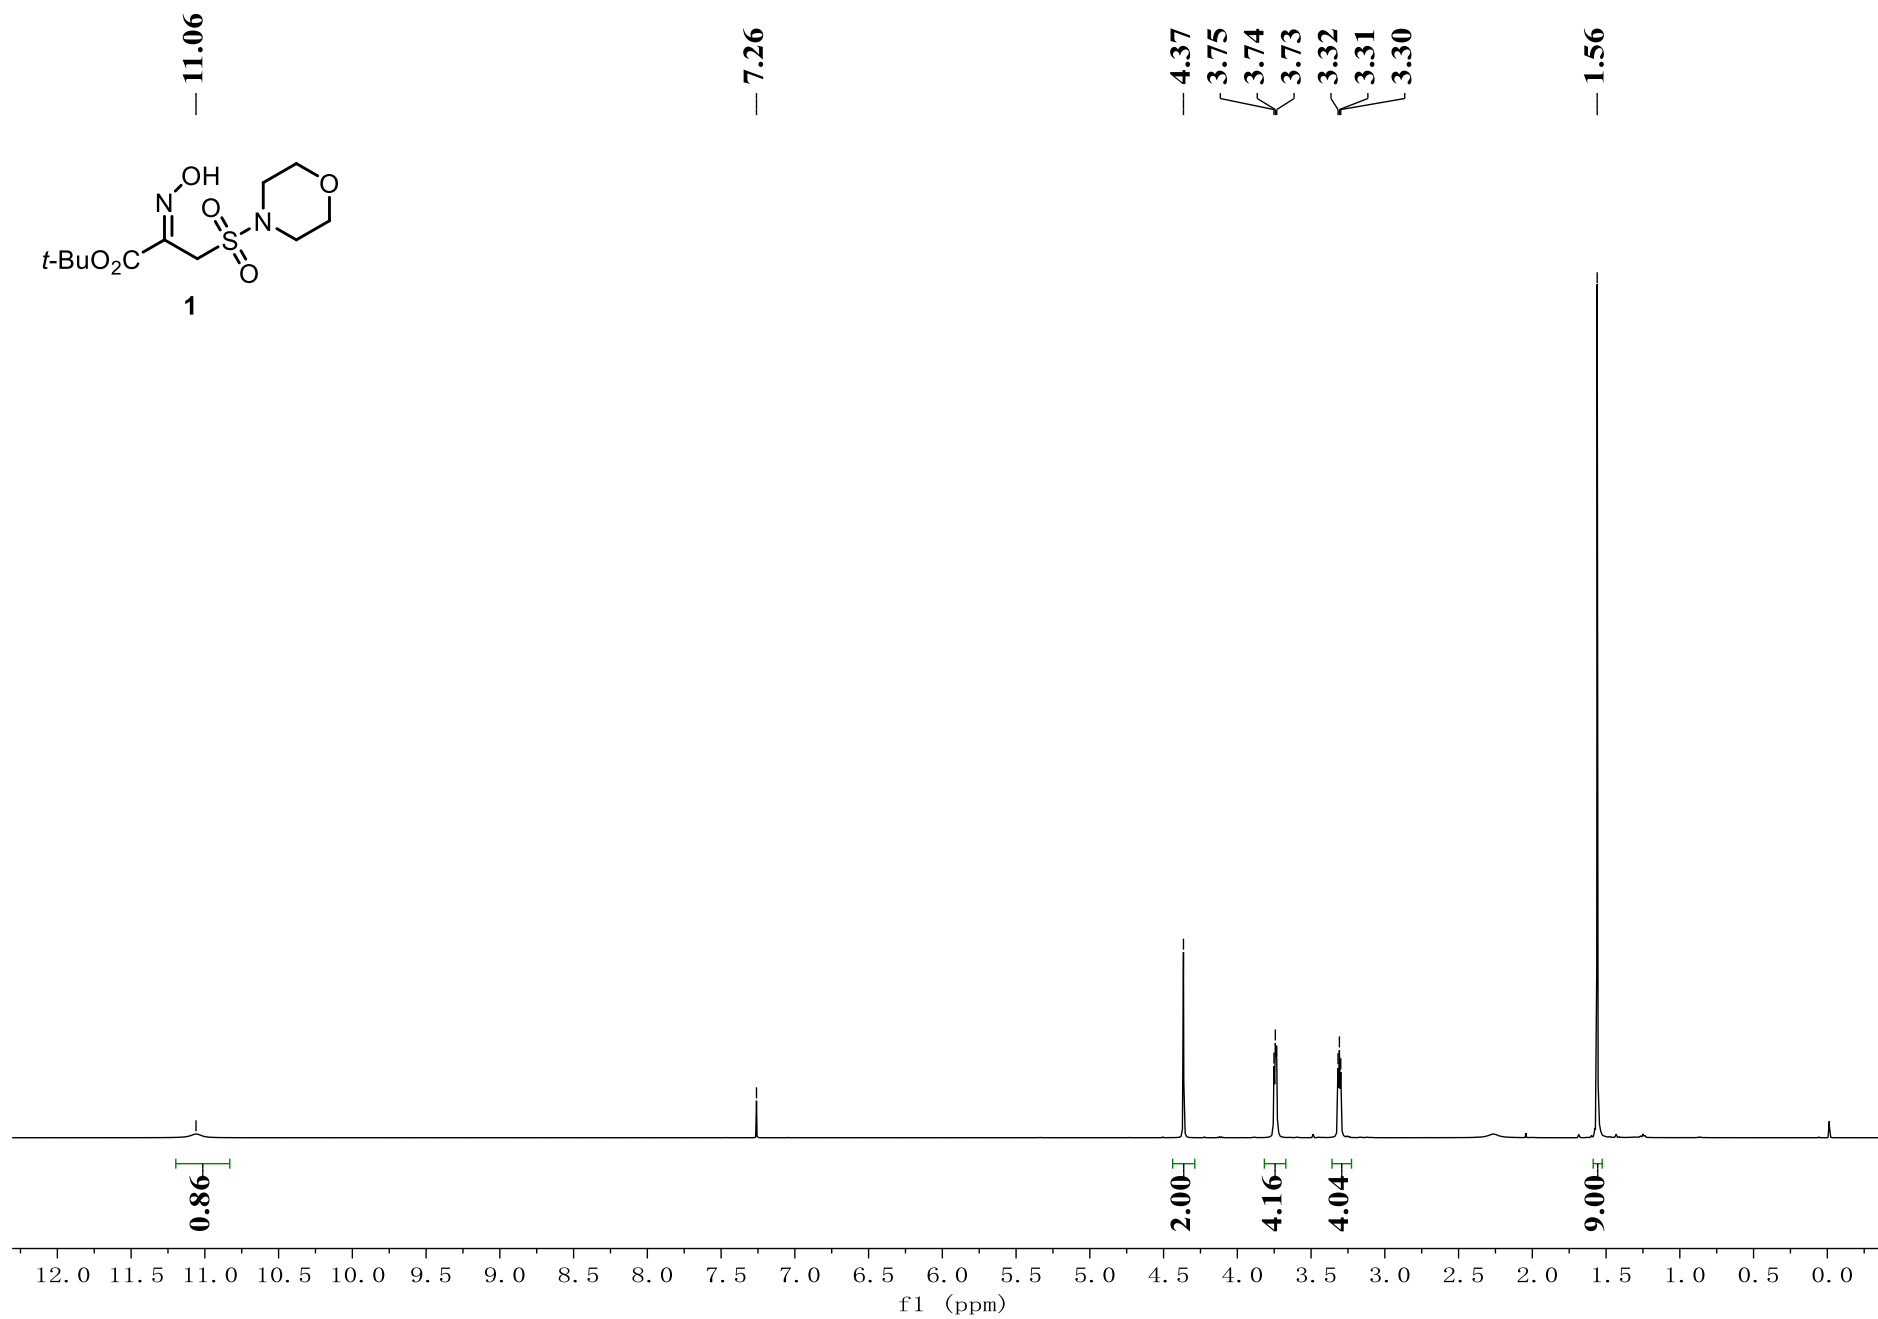

# NOESY of 1

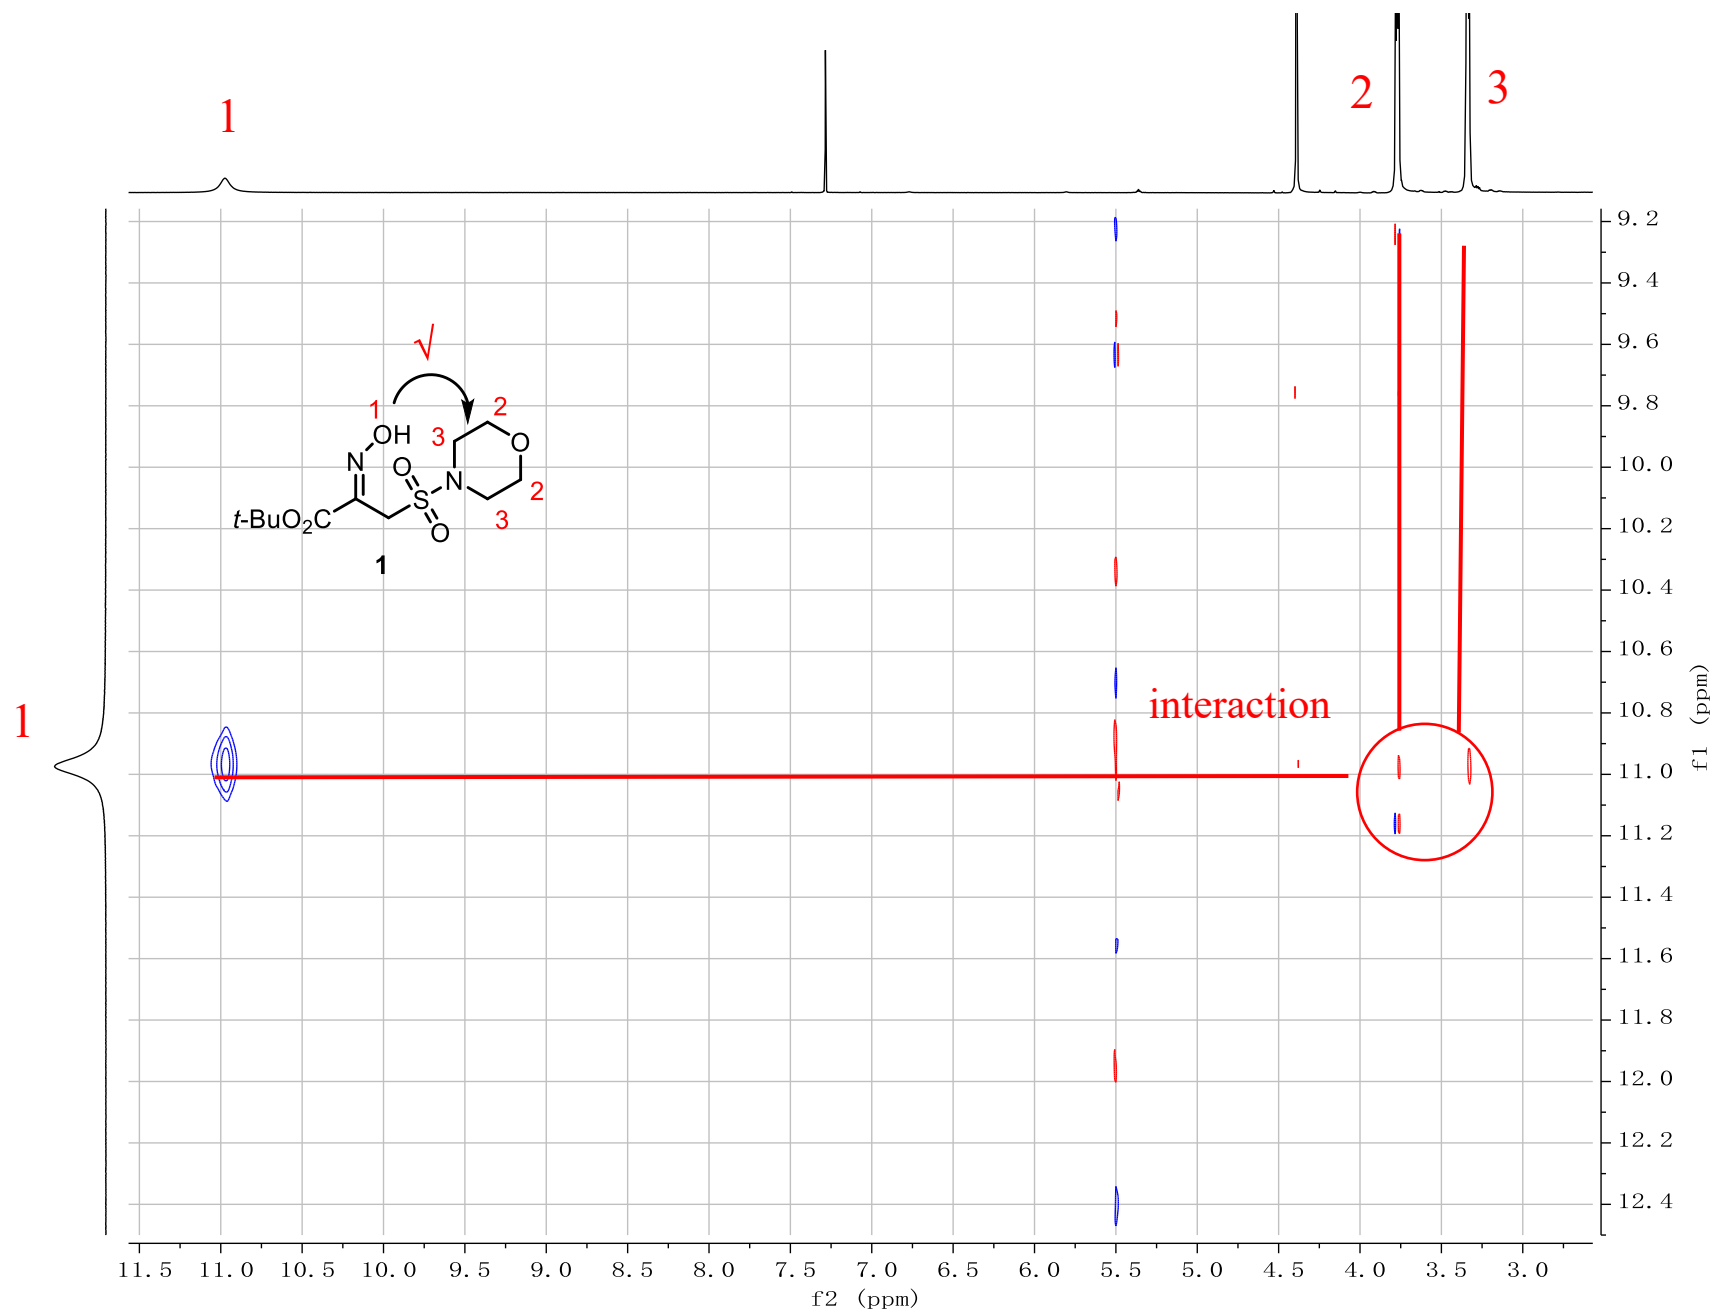

<sup>13</sup>C NMR (125 MHz, CDCl<sub>3</sub>) for 1

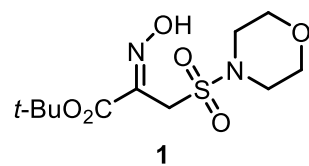

— 161.39

— 143.59

84.47

77.41

77.16

76.91

— 66.81

45.57

44.00

— 28.01

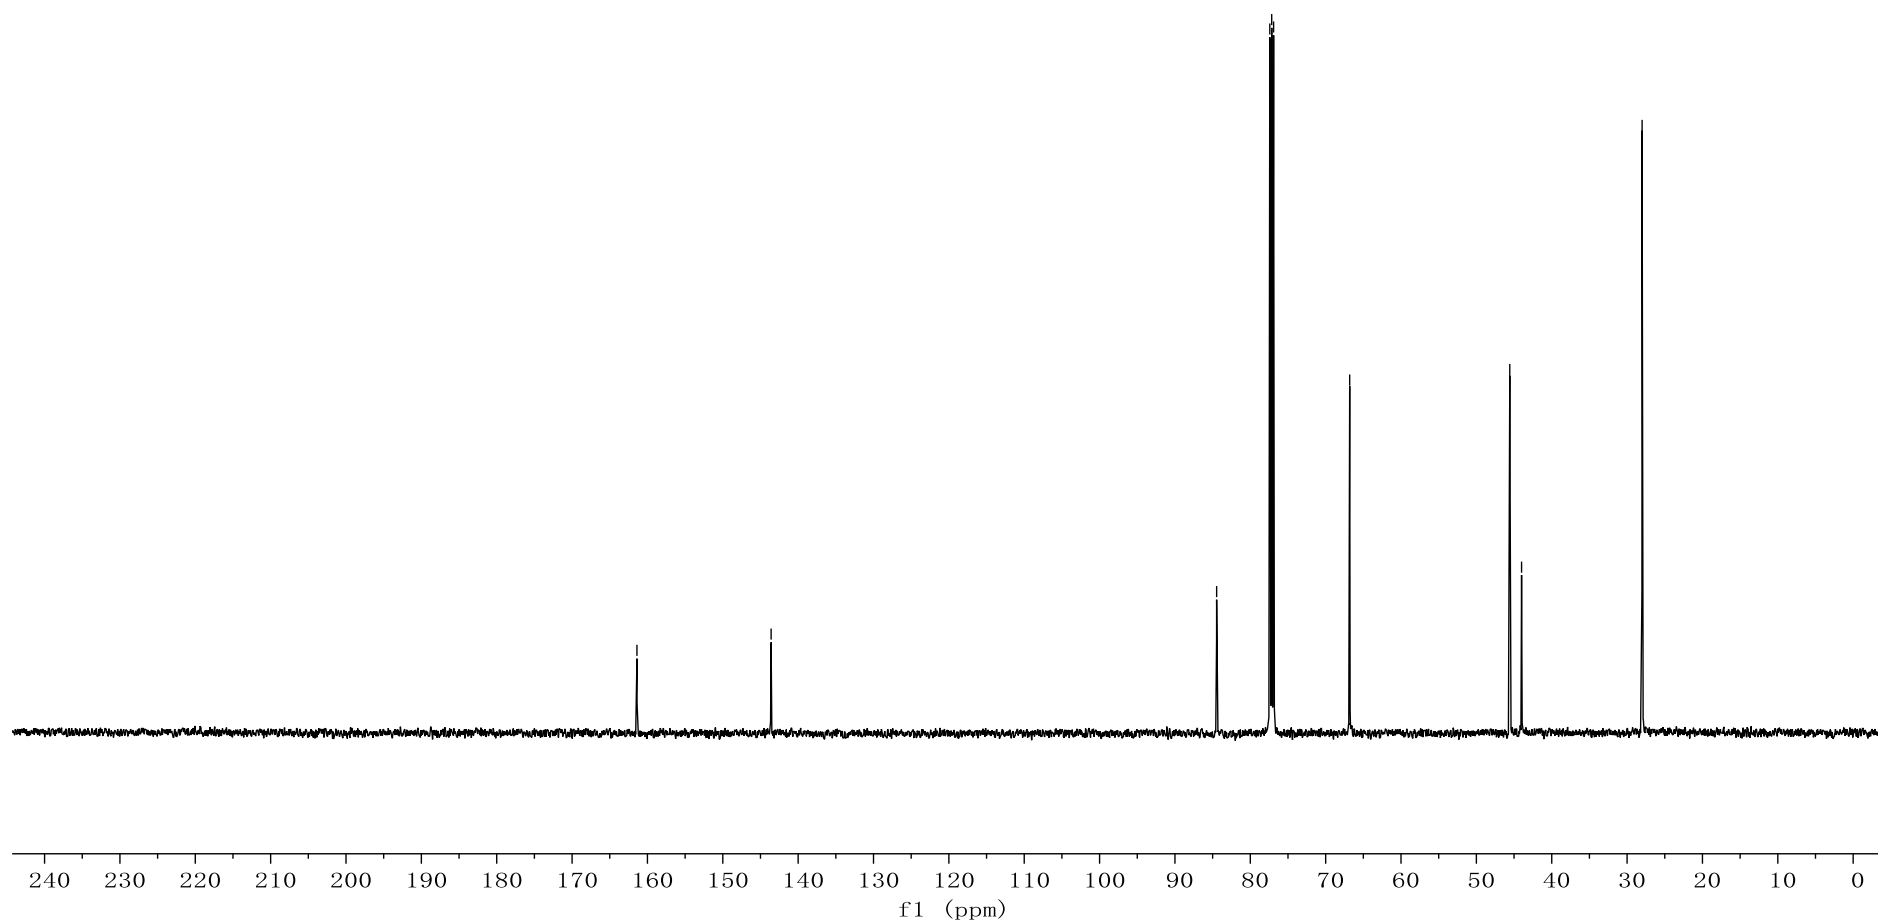

<sup>1</sup>H NMR (500 MHz, CDCl<sub>3</sub>) for 2

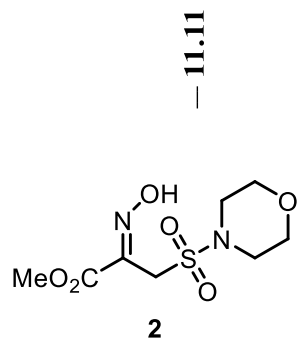

— 11.11

— 7.26

4.42  
3.93  
3.77  
3.76  
3.75  
3.33  
3.32  
3.31

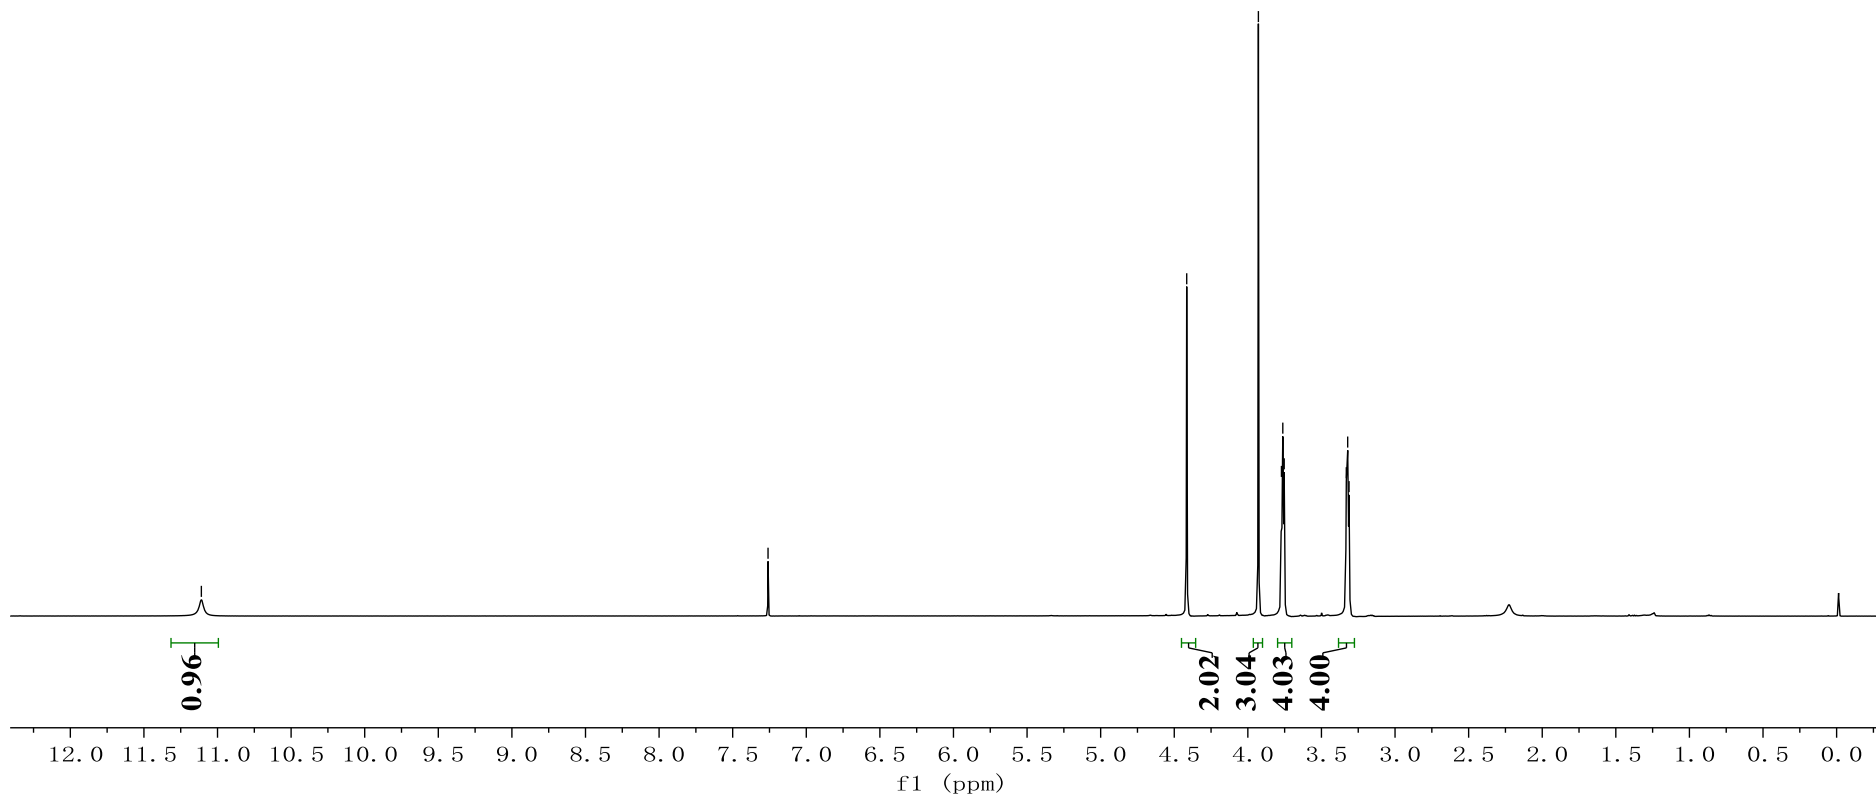

<sup>13</sup>C NMR (125 MHz, CDCl<sub>3</sub>) for 2

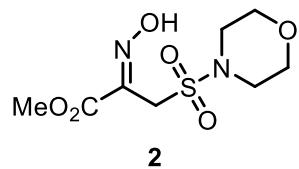

— 163.13

— 142.62

{ 77.41

{ 77.16

{ 76.91

— 66.83

— 53.66

{ 45.49

{ 43.99

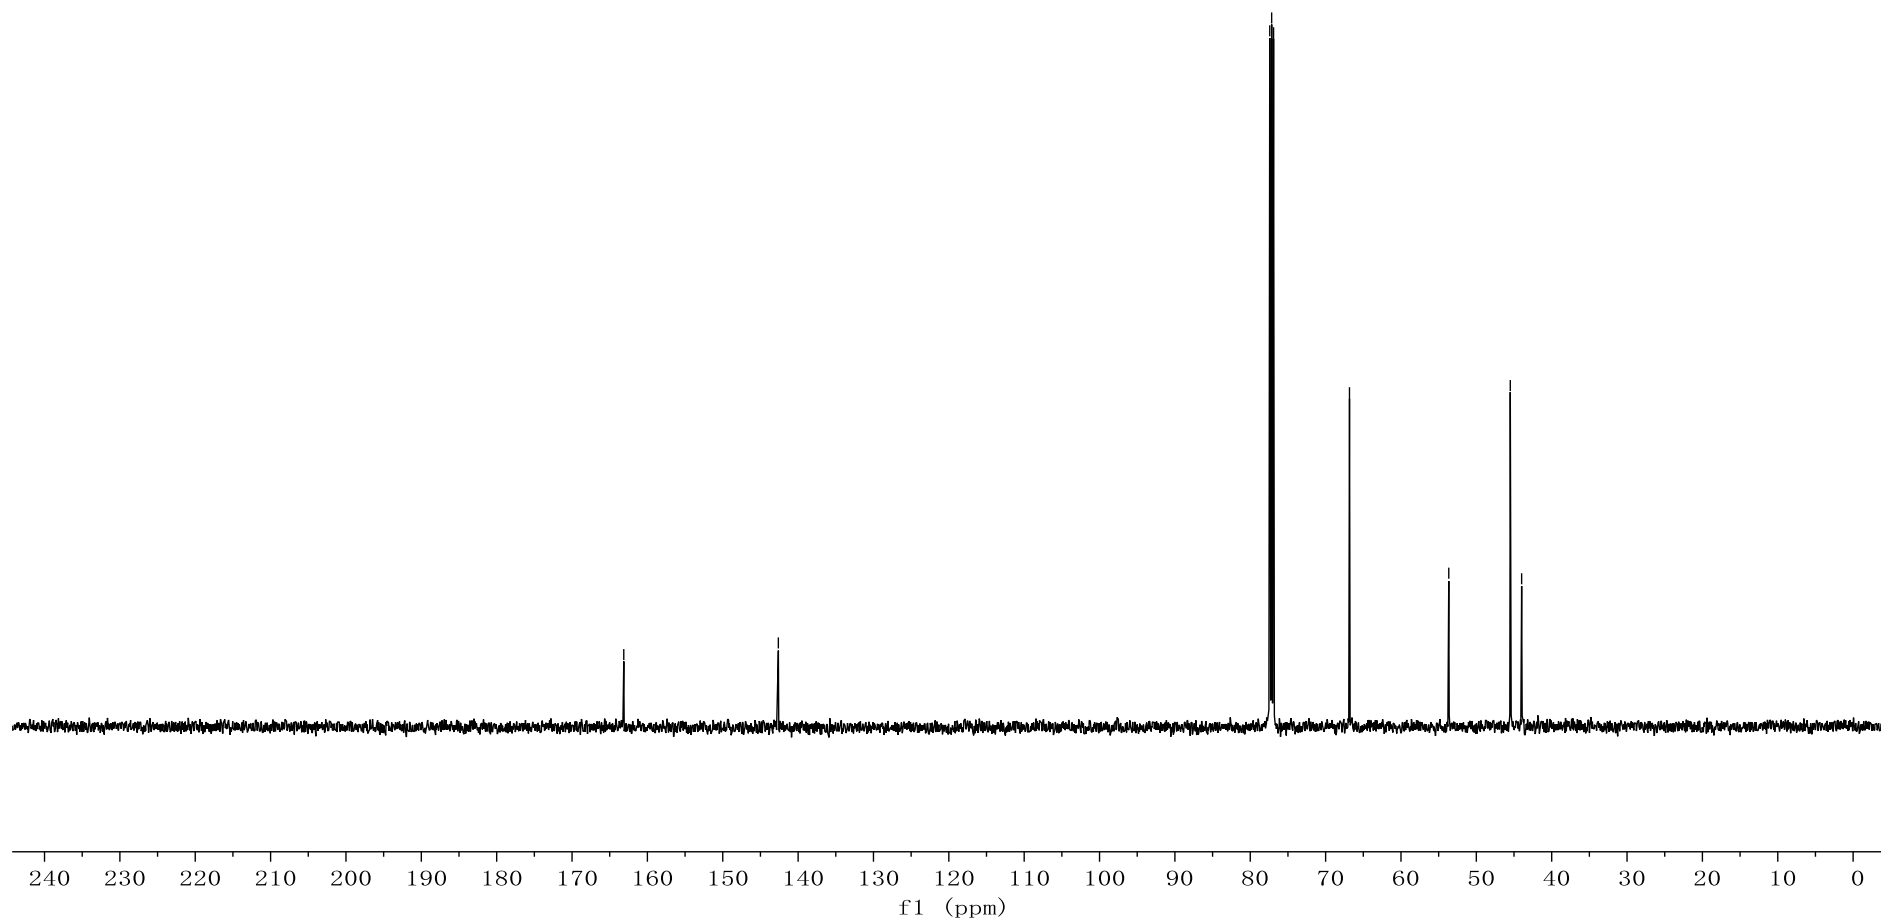

<sup>1</sup>H NMR (500 MHz, CDCl<sub>3</sub>) for 3

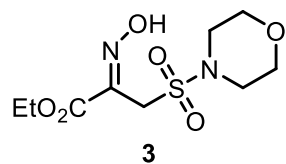

— 11.12

— 7.26

4.41  
4.40  
4.38  
4.37  
3.77  
3.76  
3.75  
3.33  
3.32  
3.31

1.38  
1.37  
1.36

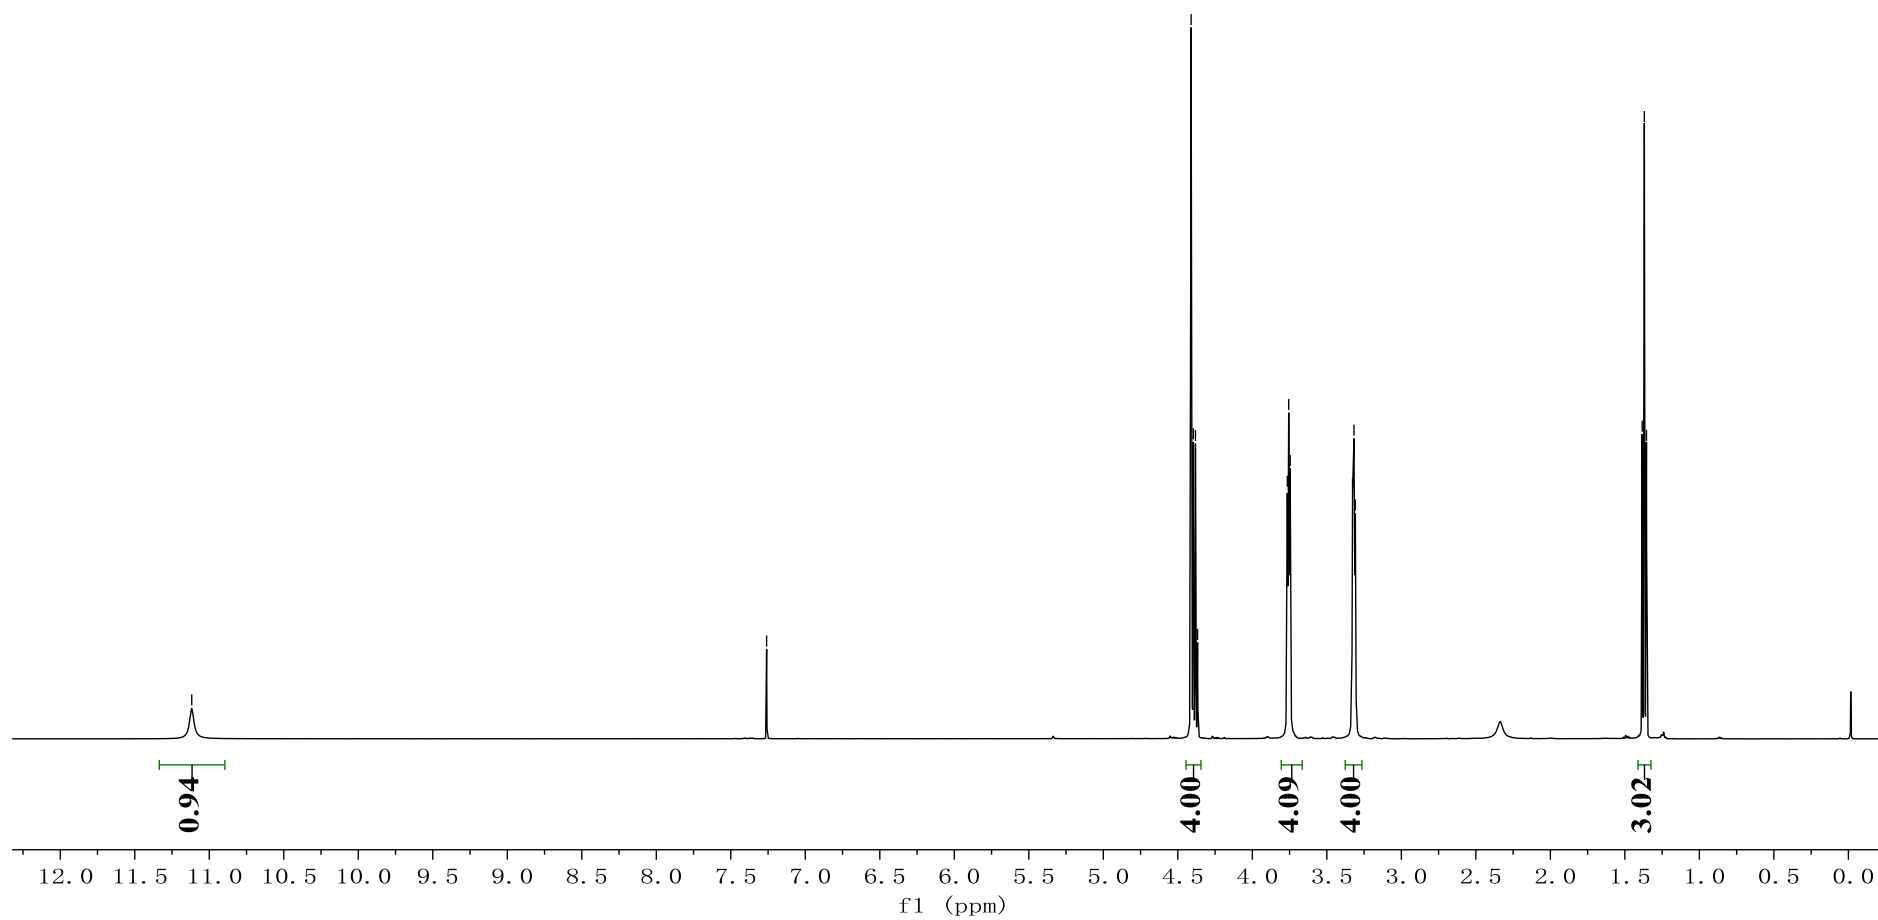

<sup>13</sup>C NMR (125 MHz, CDCl<sub>3</sub>) for 3

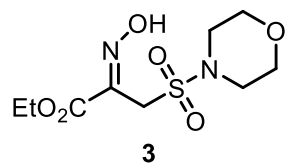

— 162.62

— 142.76

77.41

77.16

76.91

66.82

63.04

45.50

43.95

— 14.18

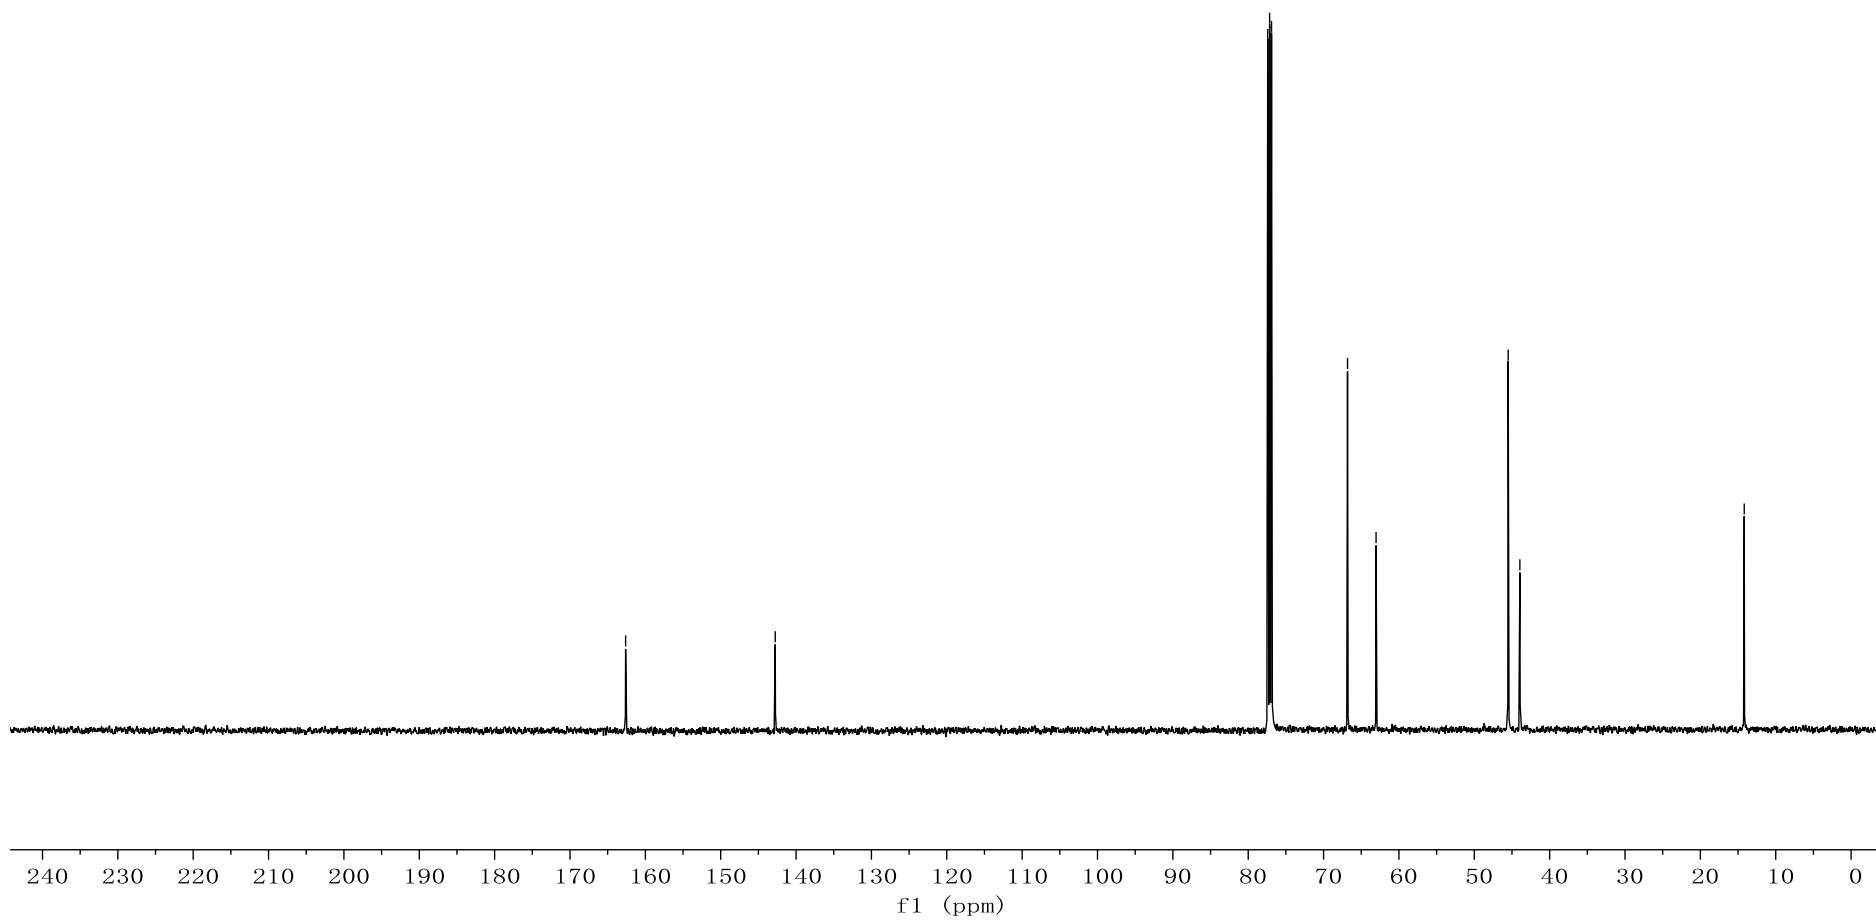



<sup>1</sup>H NMR (500 MHz, CDCl<sub>3</sub>) for 4

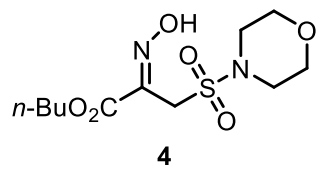

— 10.98

— 7.26

4.41  
4.34  
4.33  
4.32  
3.77  
3.76  
3.75  
3.33  
3.32  
3.31  
1.73  
1.72  
1.70  
1.69  
1.44  
1.42  
1.41  
1.39  
0.96  
0.94  
0.93

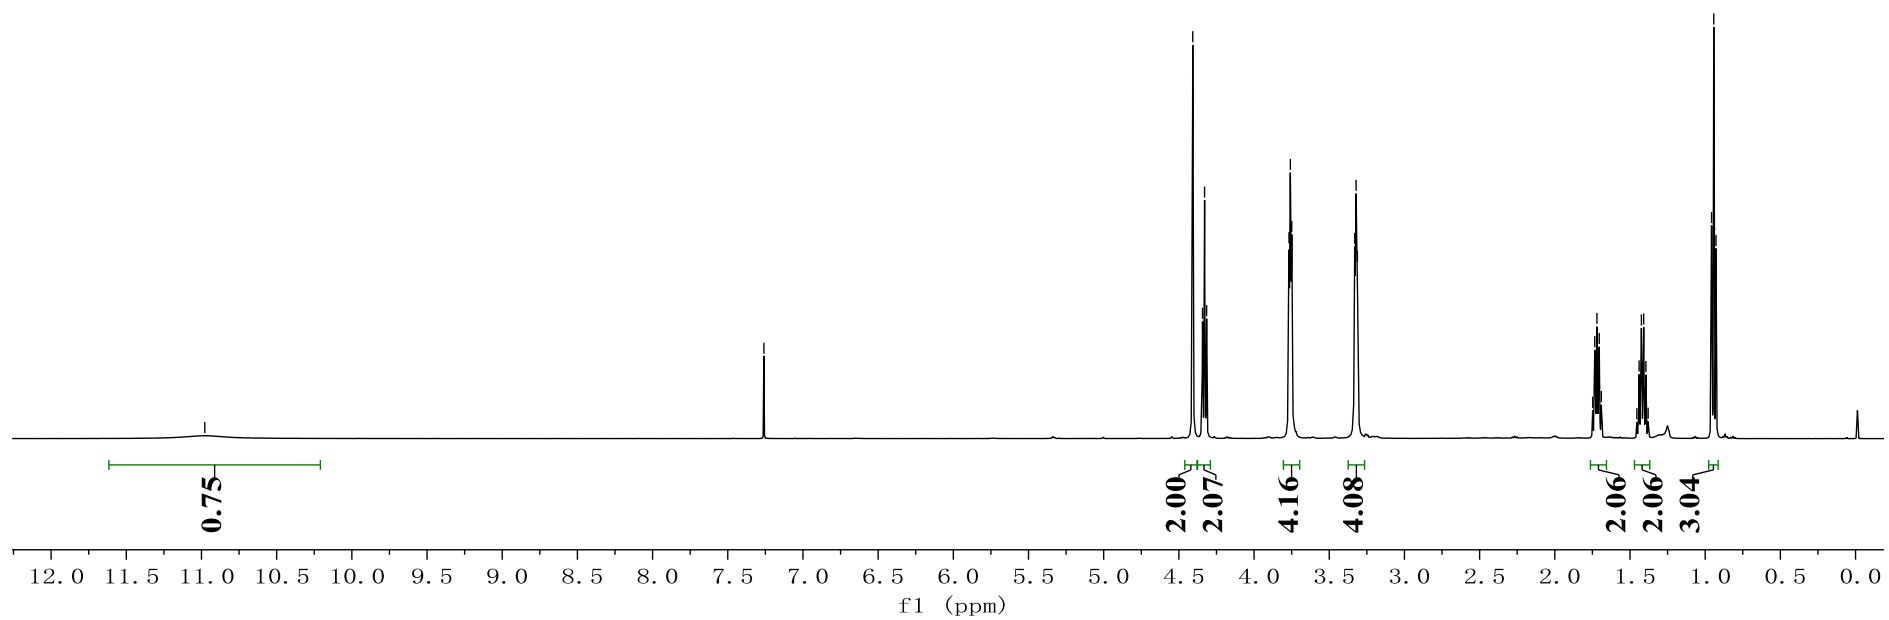

<sup>13</sup>C NMR (125 MHz, CDCl<sub>3</sub>) for 4

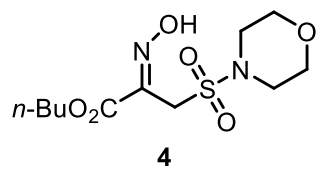

— 162.69

— 142.84

77.41

77.16

76.91

— 66.85

45.51

44.00

— 30.53

— 19.11

— 13.79

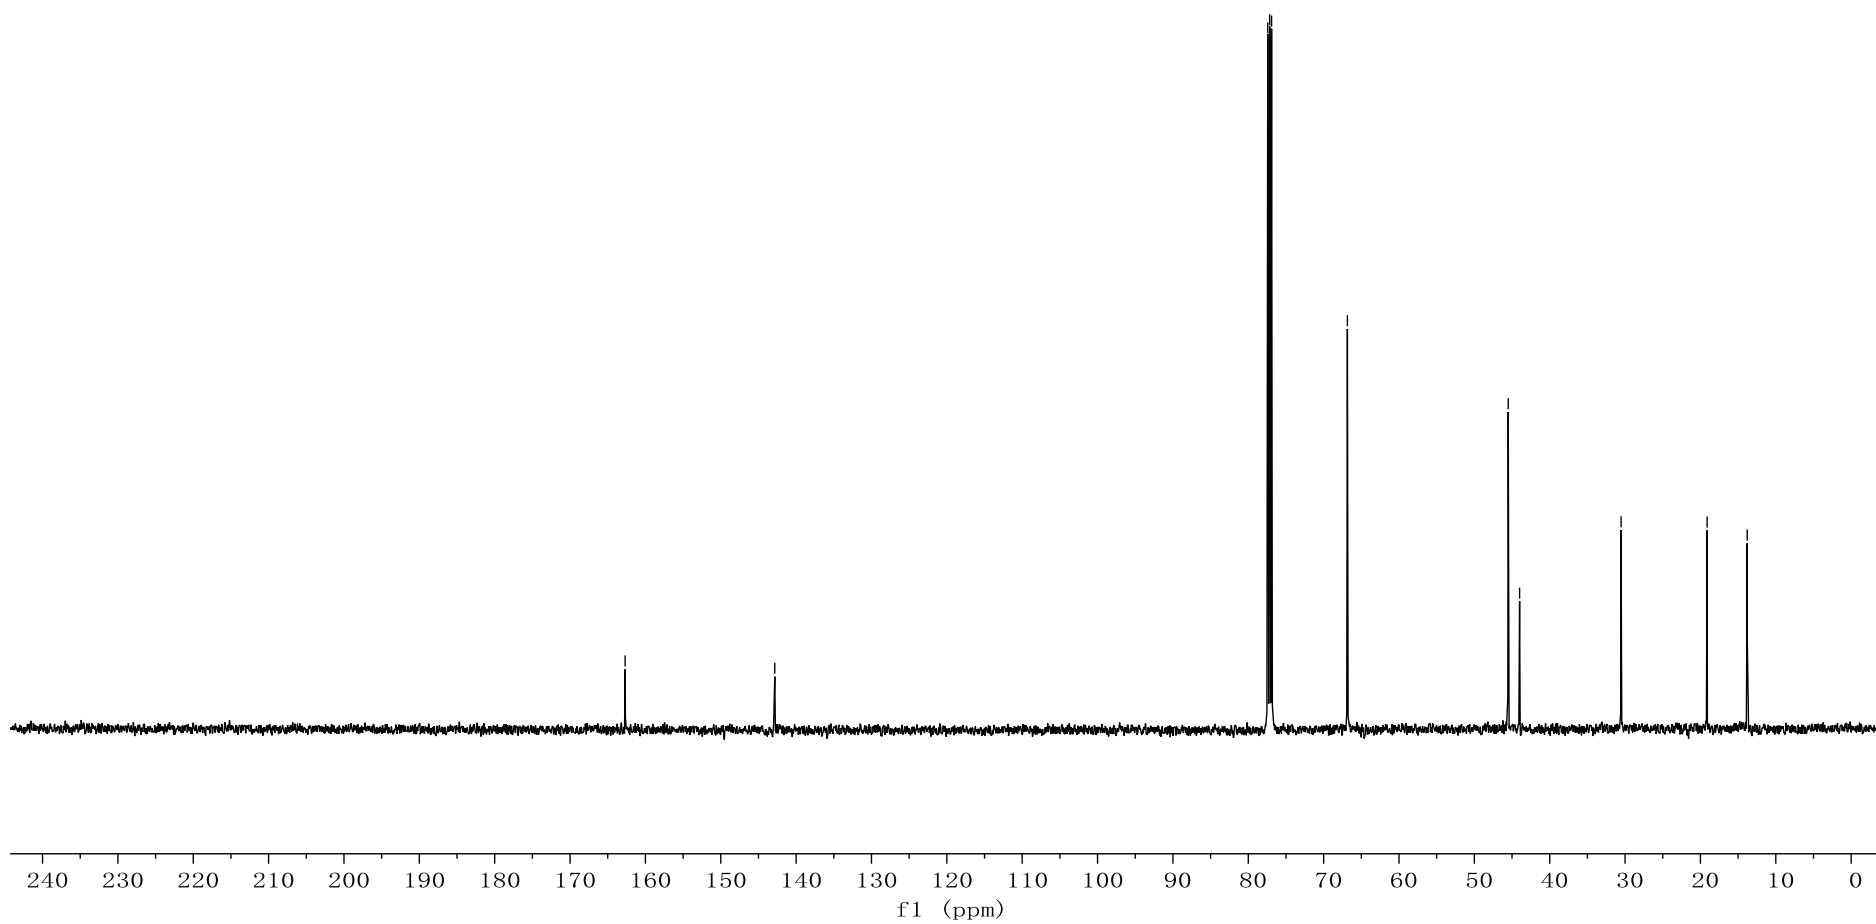

<sup>1</sup>H NMR (500 MHz, CDCl<sub>3</sub>) for 5

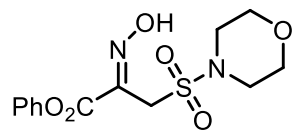

5

11.14

7.43 7.43 7.42 7.41 7.40 7.40 7.30 7.30 7.30 7.29 7.27 7.27 7.26 7.21 7.20 7.19 7.19 7.19

4.51 3.77 3.76 3.75 3.36 3.35 3.34

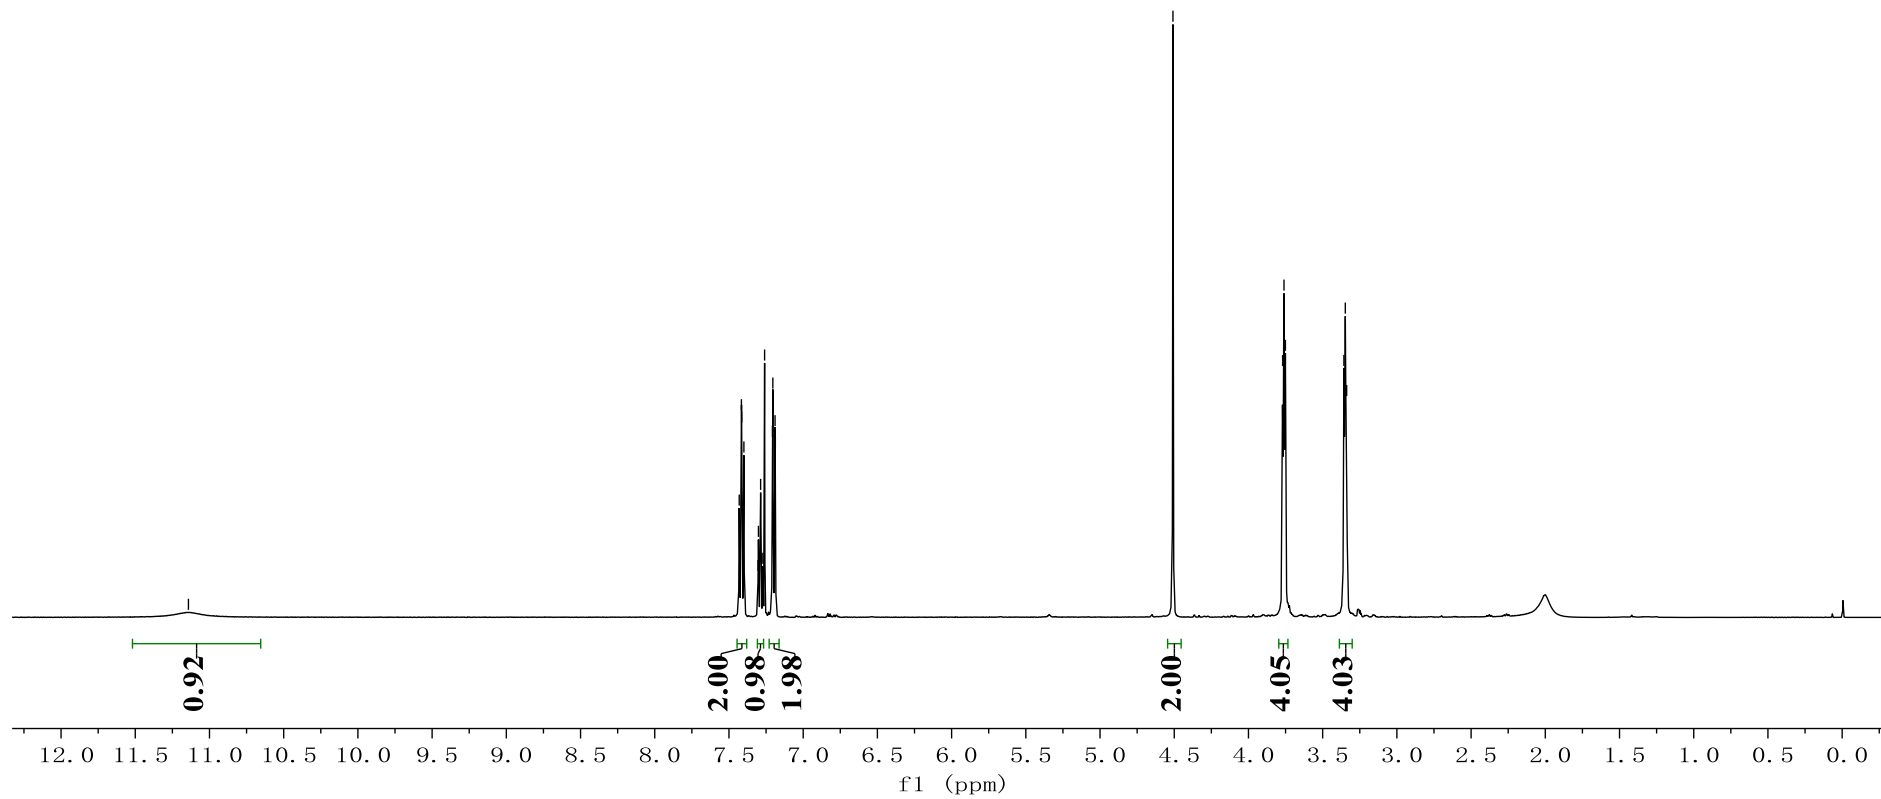

<sup>13</sup>C NMR (125 MHz, CDCl<sub>3</sub>) for 5

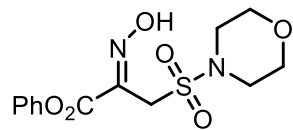

5

— 161.37  
— 150.32  
— 142.67  
~ 129.81  
~ 126.76  
~ 121.48  
  
77.41  
77.16  
76.91  
— 66.80  
  
45.66  
44.15

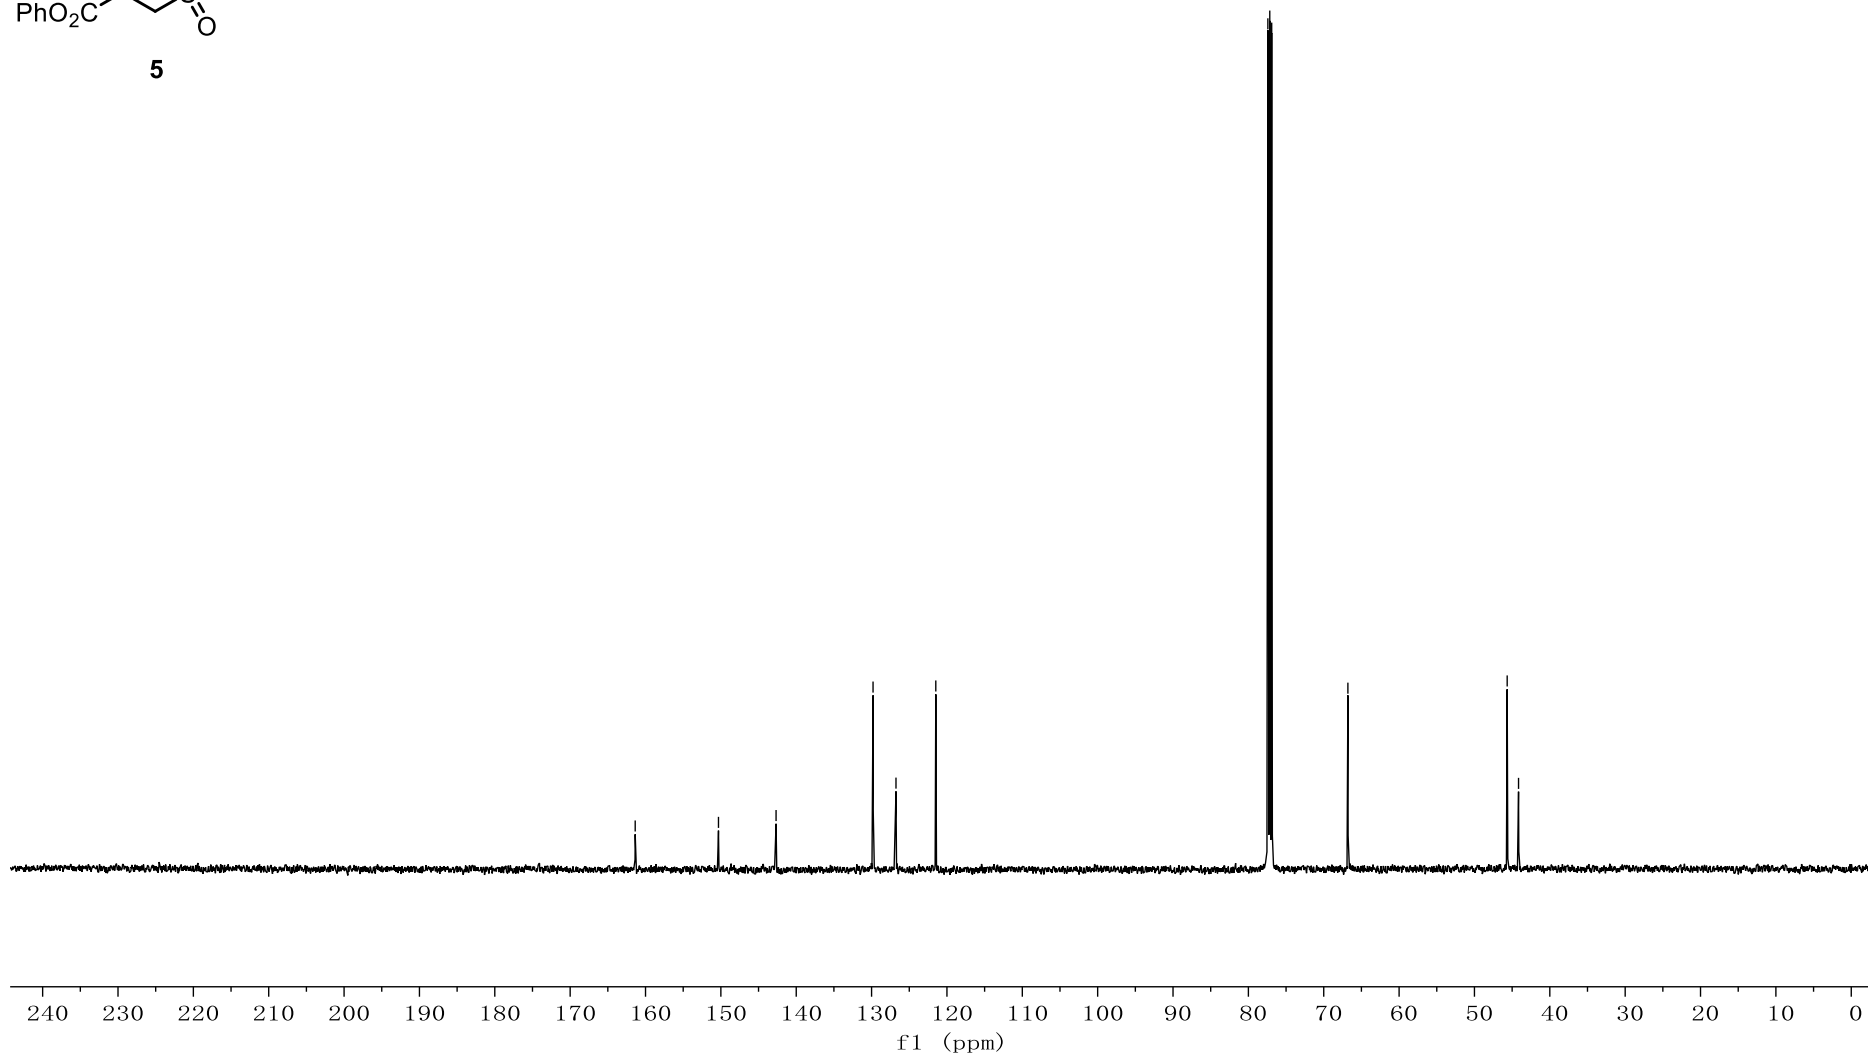

<sup>1</sup>H NMR (500 MHz, CDCl<sub>3</sub>) for 6

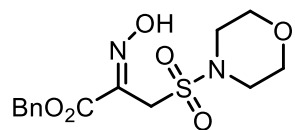

6

11.16

7.41  
7.41  
7.40  
7.40  
7.39  
7.38  
7.37  
7.36  
7.35  
7.35  
7.34  
7.33  
7.26

5.33

4.38  
3.70  
3.69  
3.69  
3.26  
3.25  
3.24

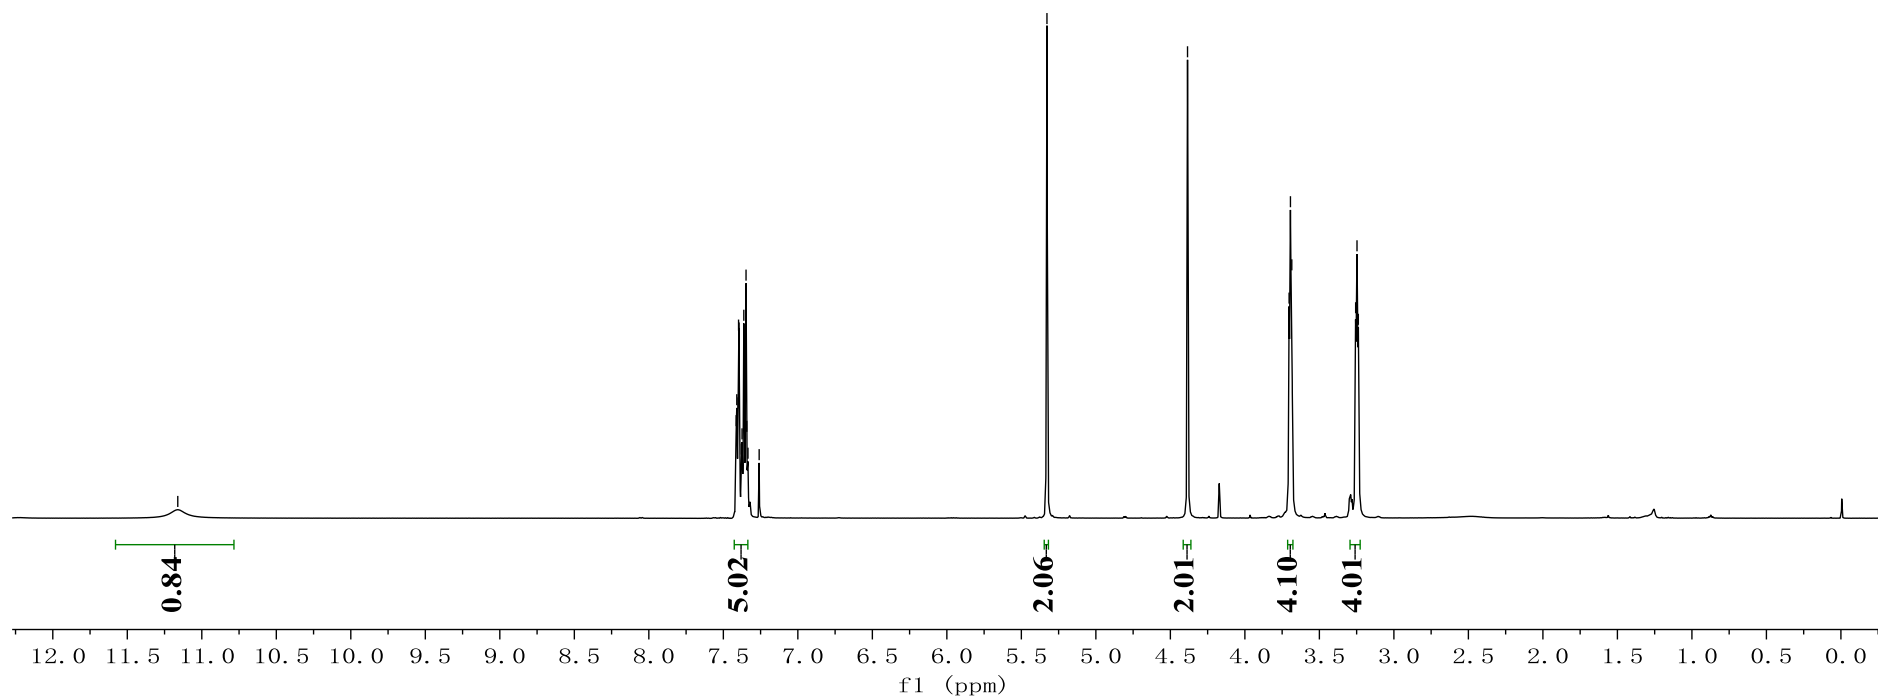

<sup>13</sup>C NMR (125 MHz, CDCl<sub>3</sub>) for 6

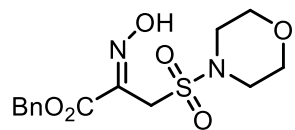

6

162.48  
142.49  
134.69  
128.87  
128.82  
128.78  
77.41  
77.16  
76.91  
68.52  
66.74  
45.45  
44.02

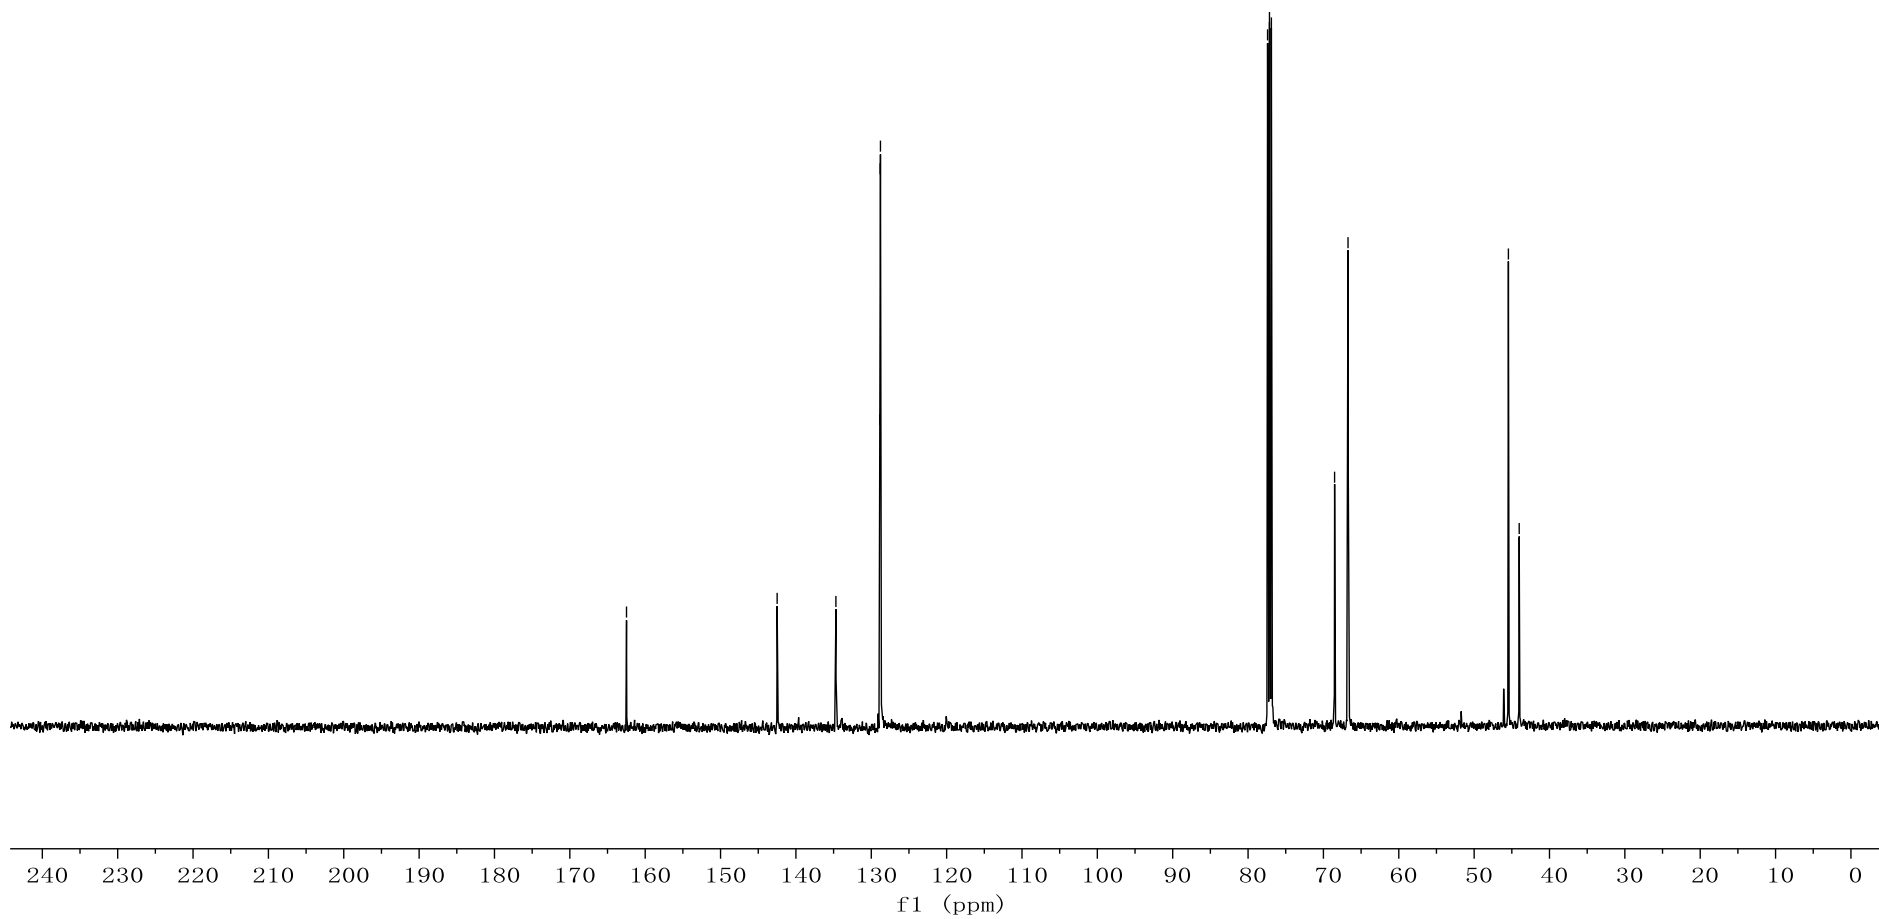



<sup>13</sup>C NMR (125 MHz, CDCl<sub>3</sub>) for 7

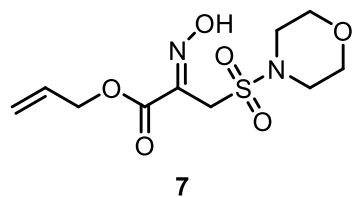

— 162.33

— 142.70

— 131.04

— 120.00

{ 77.41

{ 77.16

{ 76.91

{ 67.39

{ 66.83

{ 45.52

{ 44.00

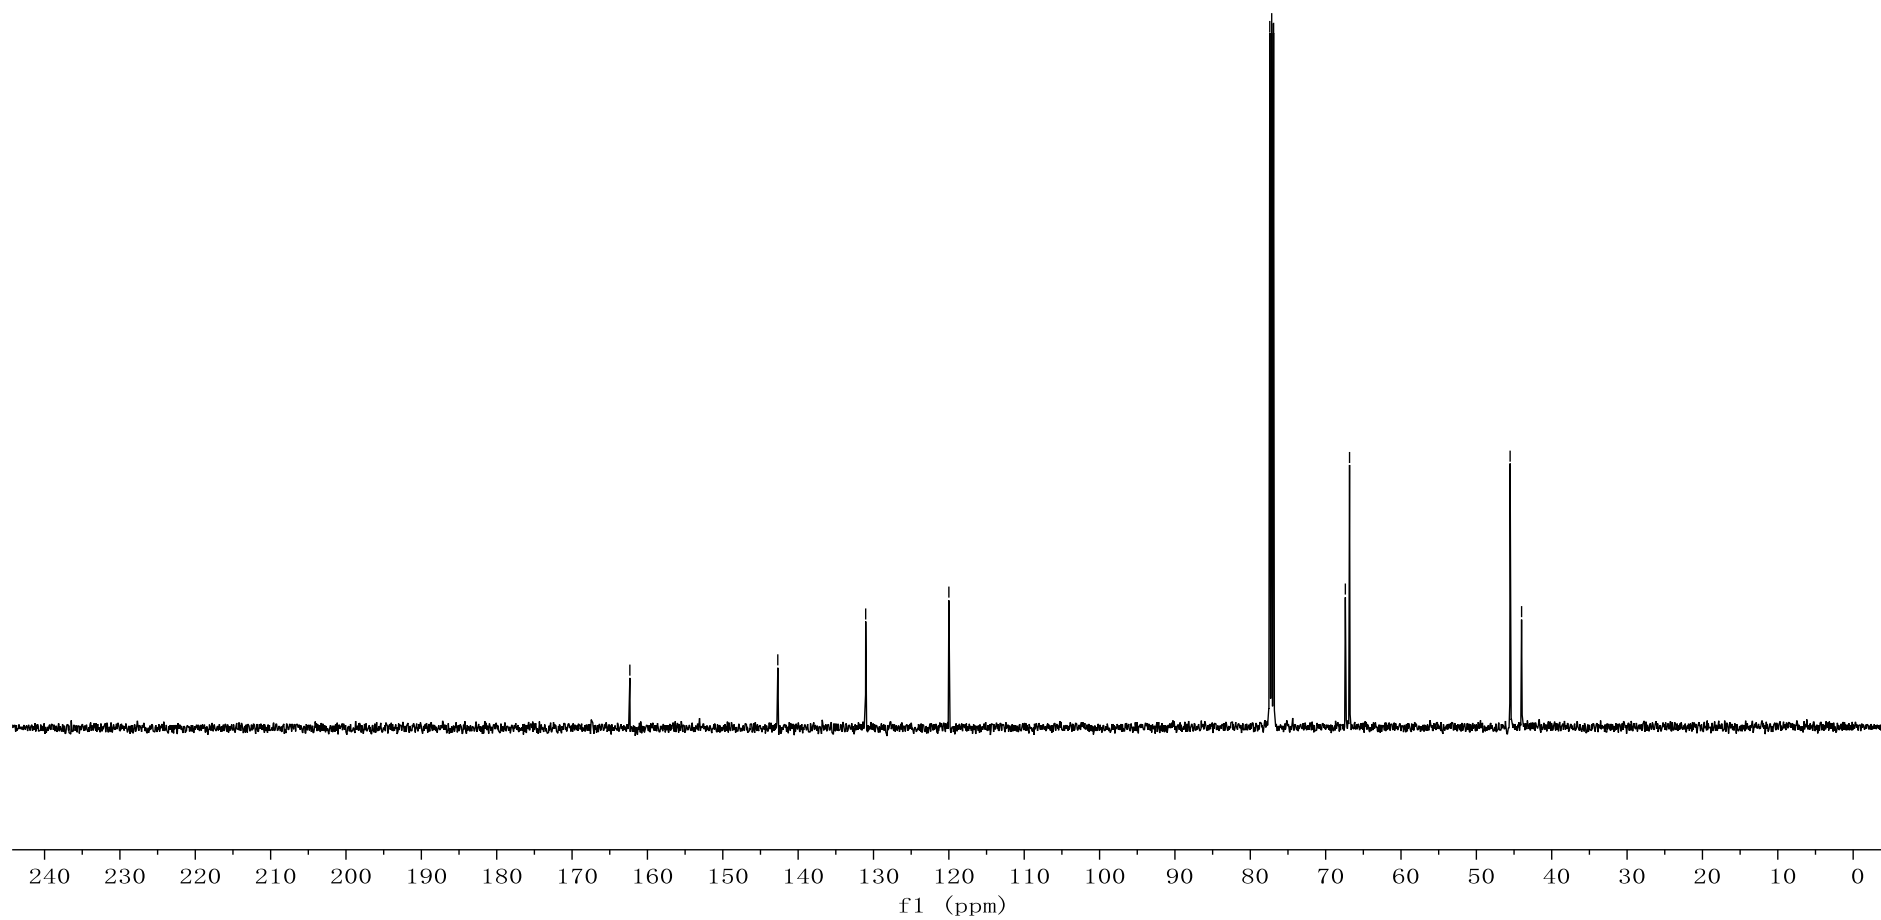



<sup>1</sup>H NMR (500 MHz, CD<sub>3</sub>CN) for 8

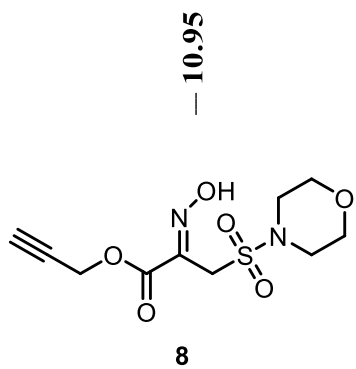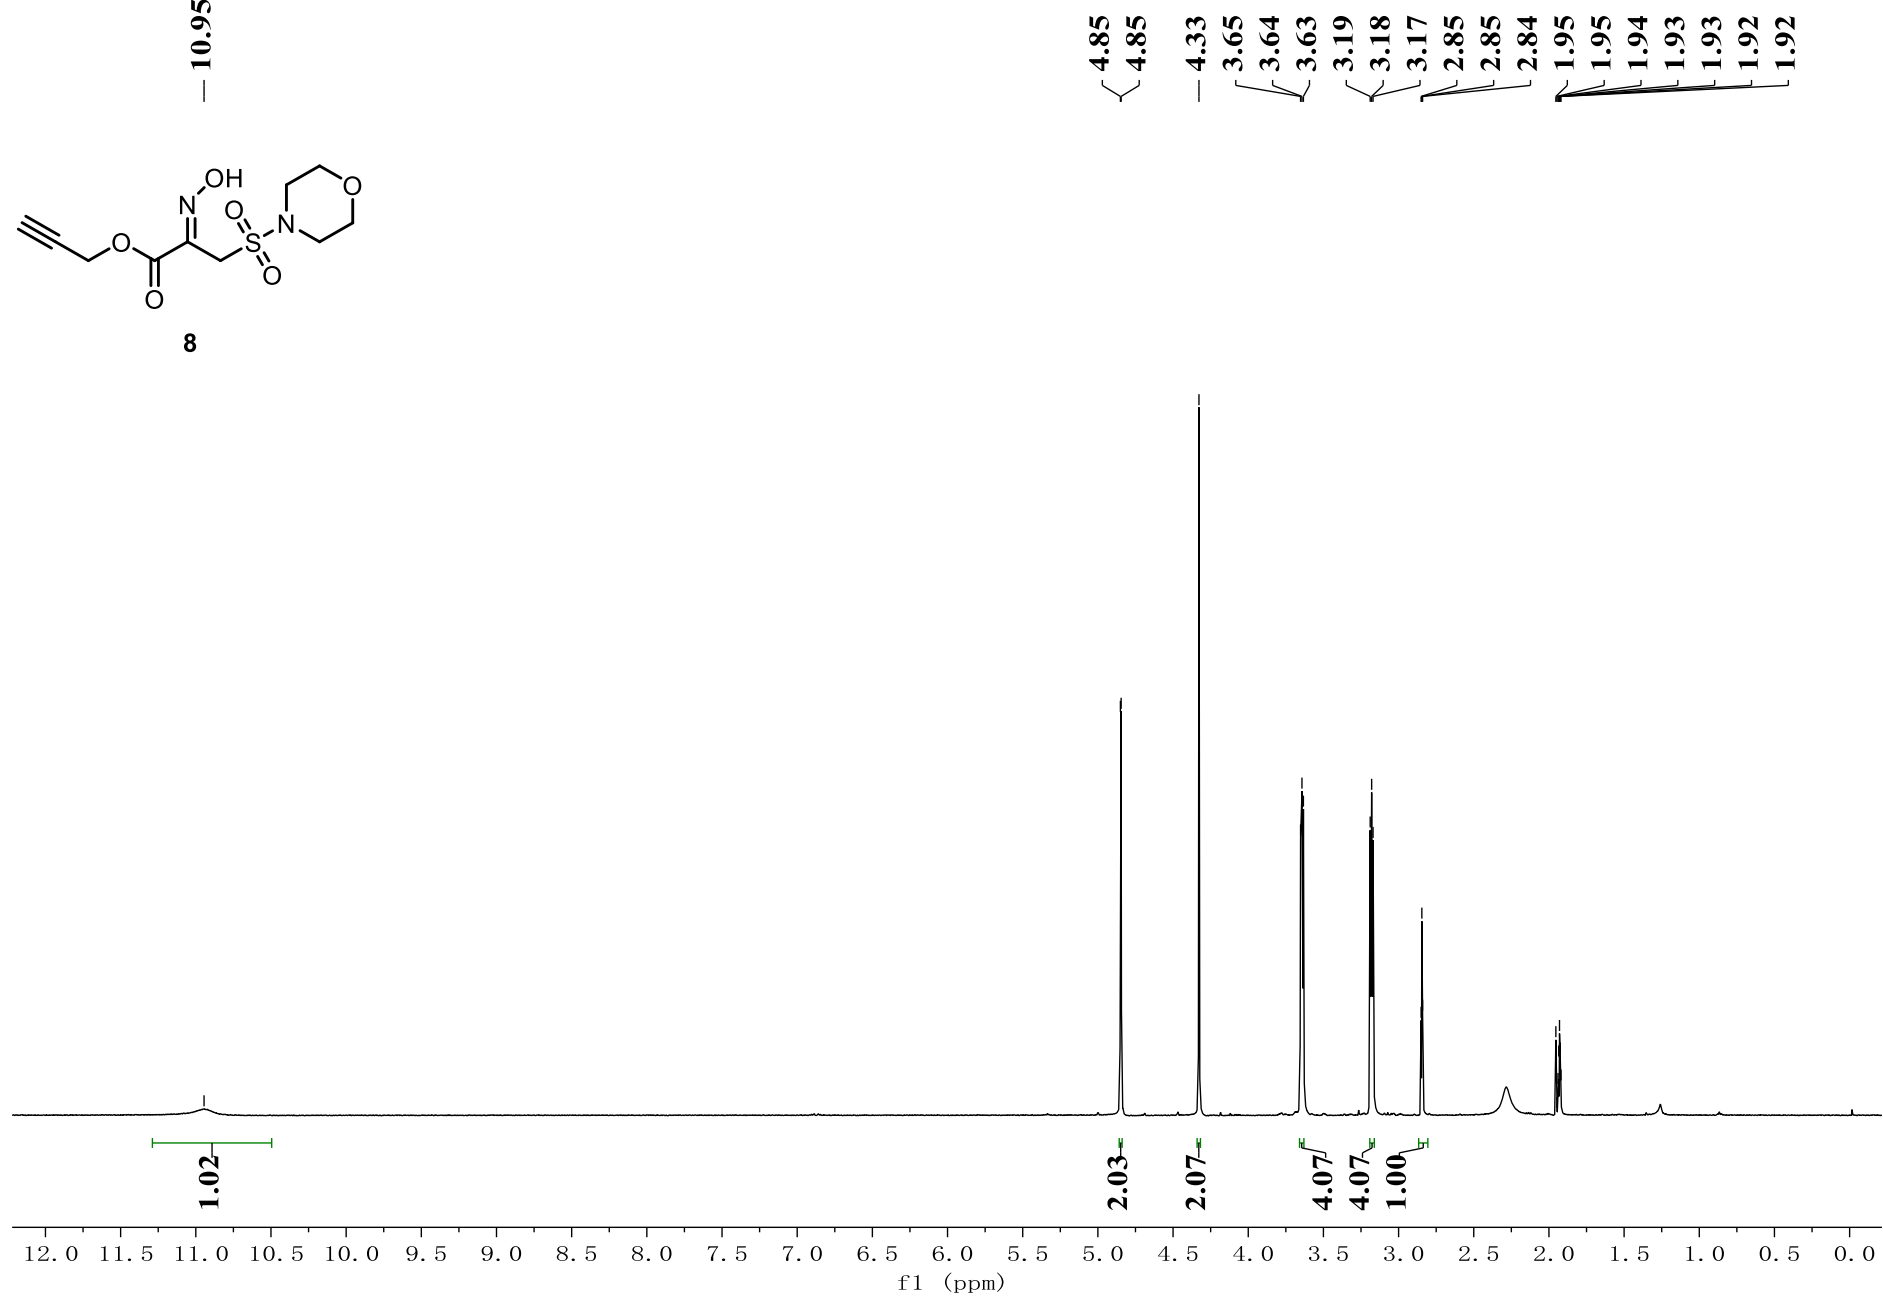

<sup>13</sup>C NMR (125 MHz, CD<sub>3</sub>CN) for 8

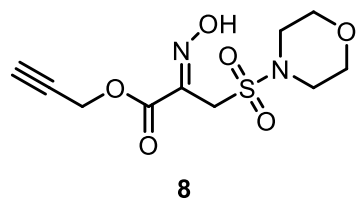

— 162.94

— 142.88

— 118.26

∩ 78.05

∩ 76.96

— 67.02

— 54.11

∩ 46.38

— 44.26

∩ 1.76

∩ 1.59

∩ 1.43

∩ 1.26

∩ 1.10

∩ 0.93

∩ 0.76

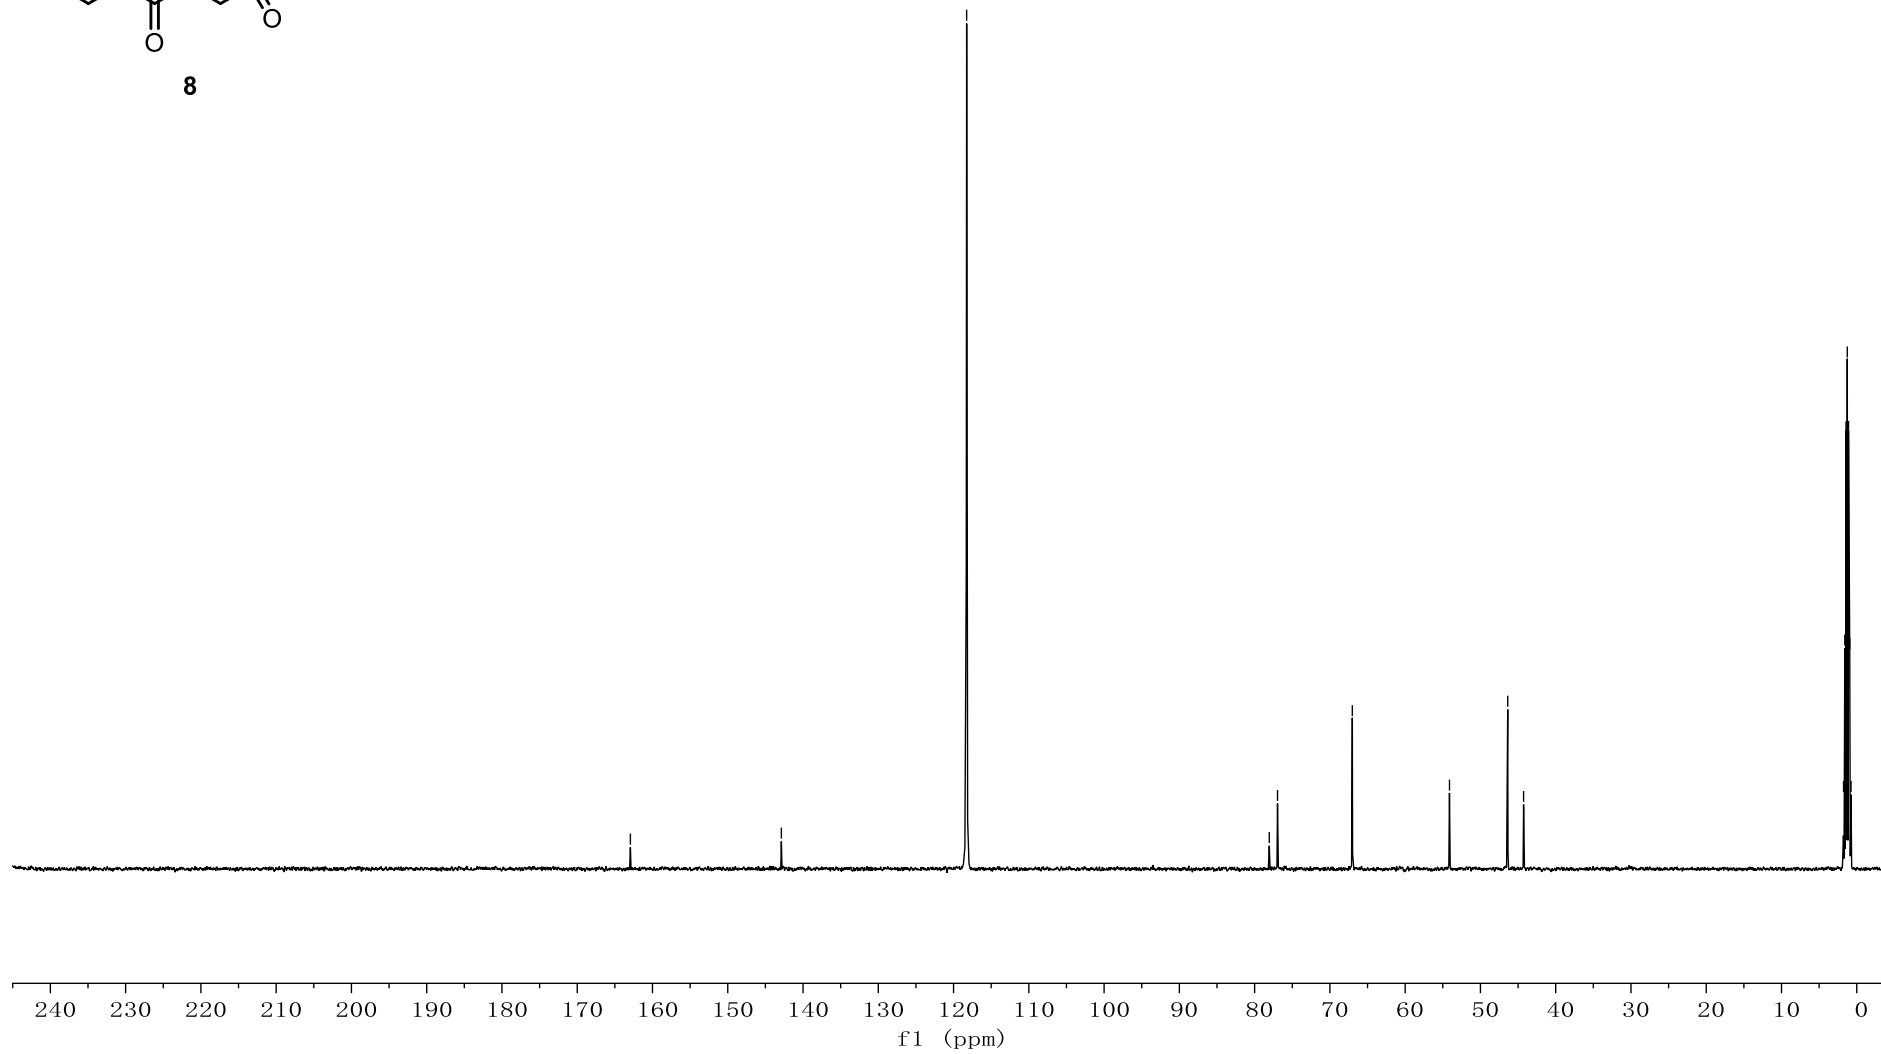

<sup>1</sup>H NMR (500 MHz, CDCl<sub>3</sub>) for 9

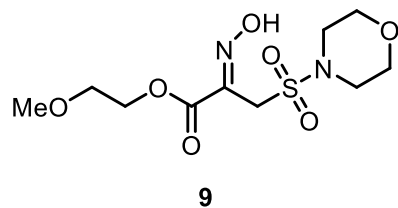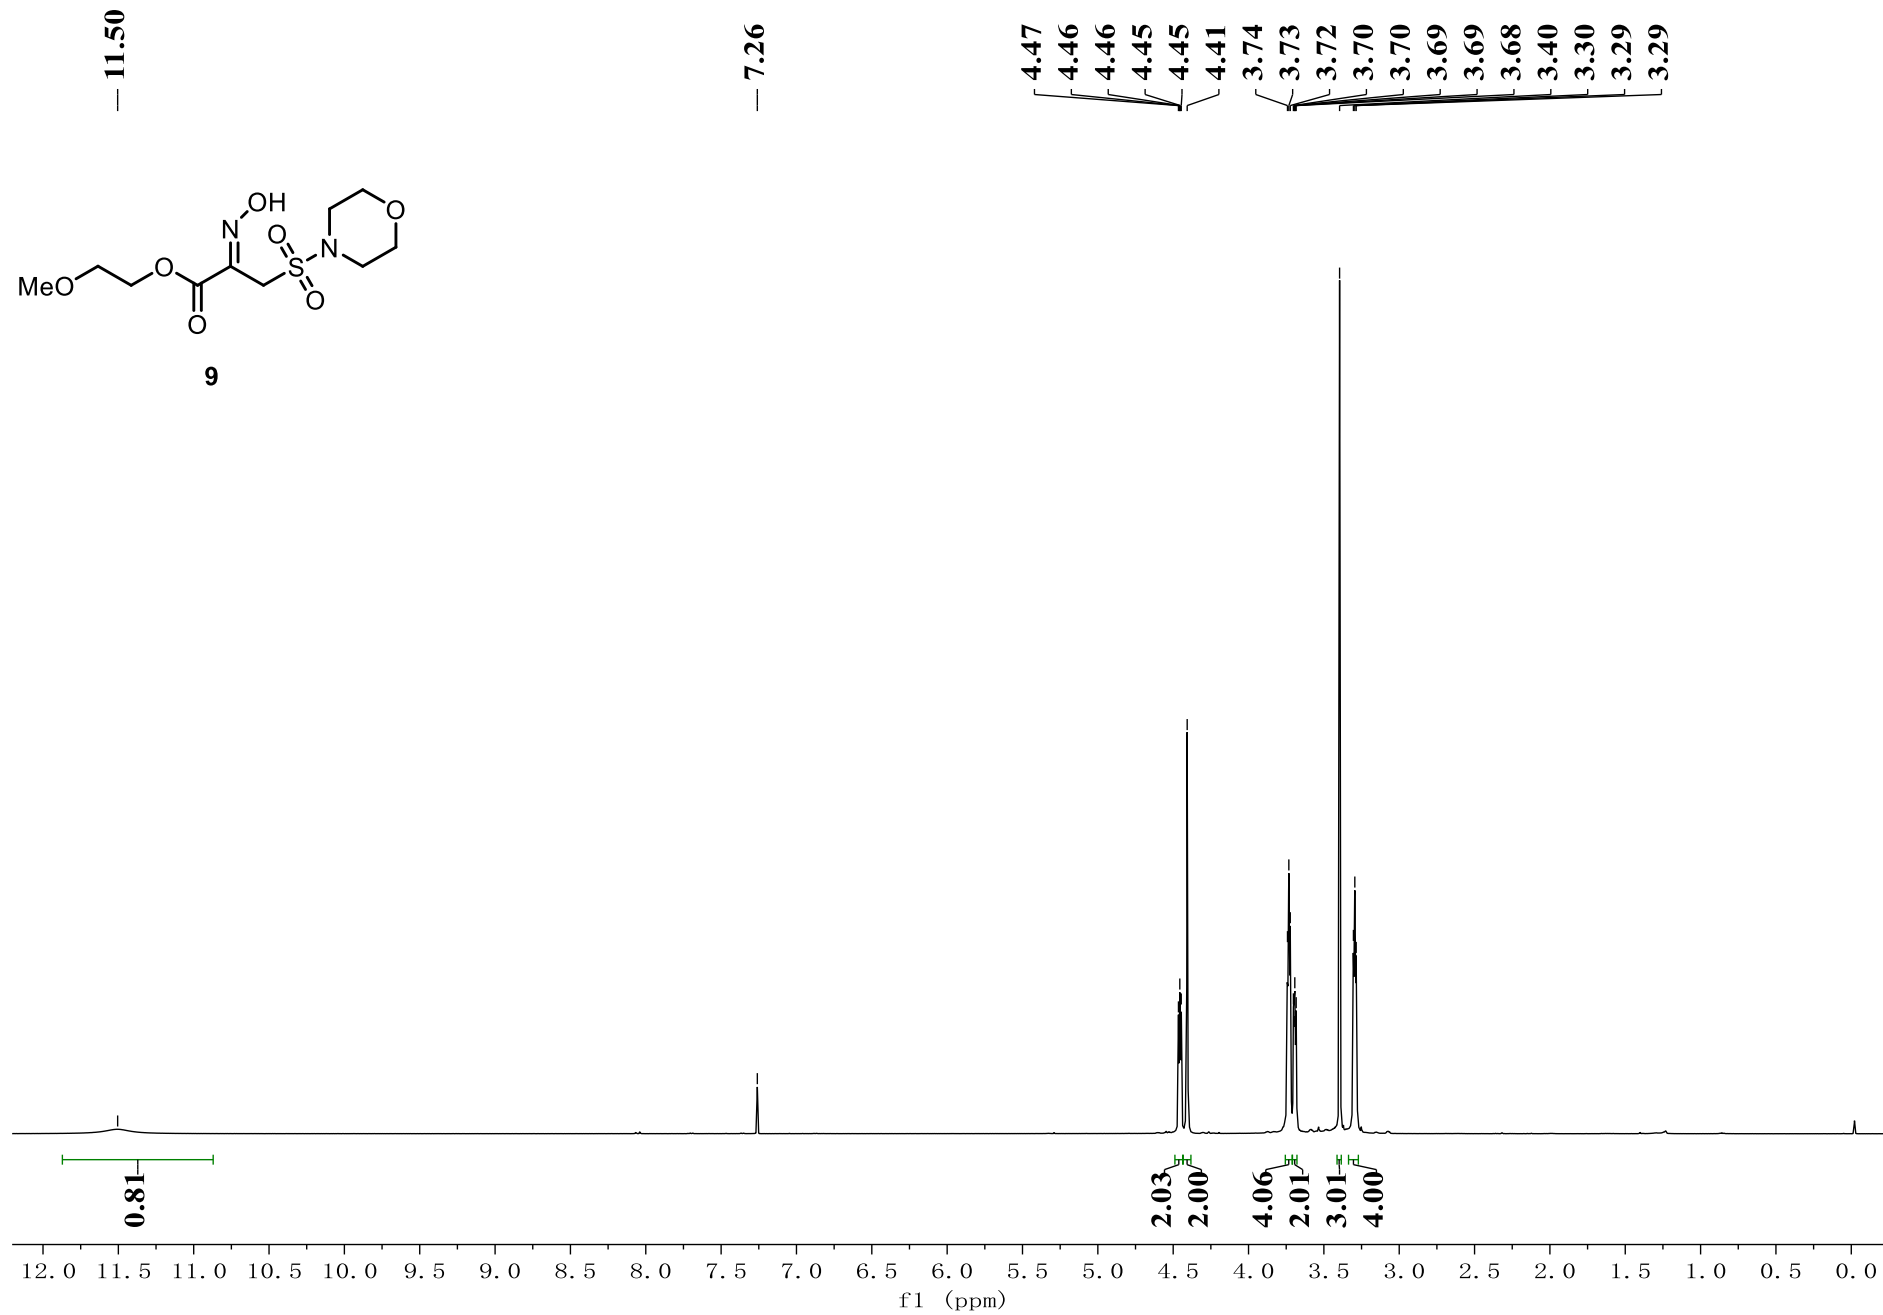

<sup>13</sup>C NMR (125 MHz, CDCl<sub>3</sub>) for 9

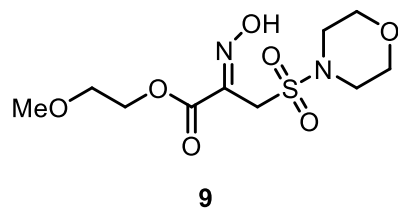

— 162.57

— 142.28

77.41  
77.16  
76.91  
70.10  
66.75  
65.21  
59.03  
45.53  
44.02

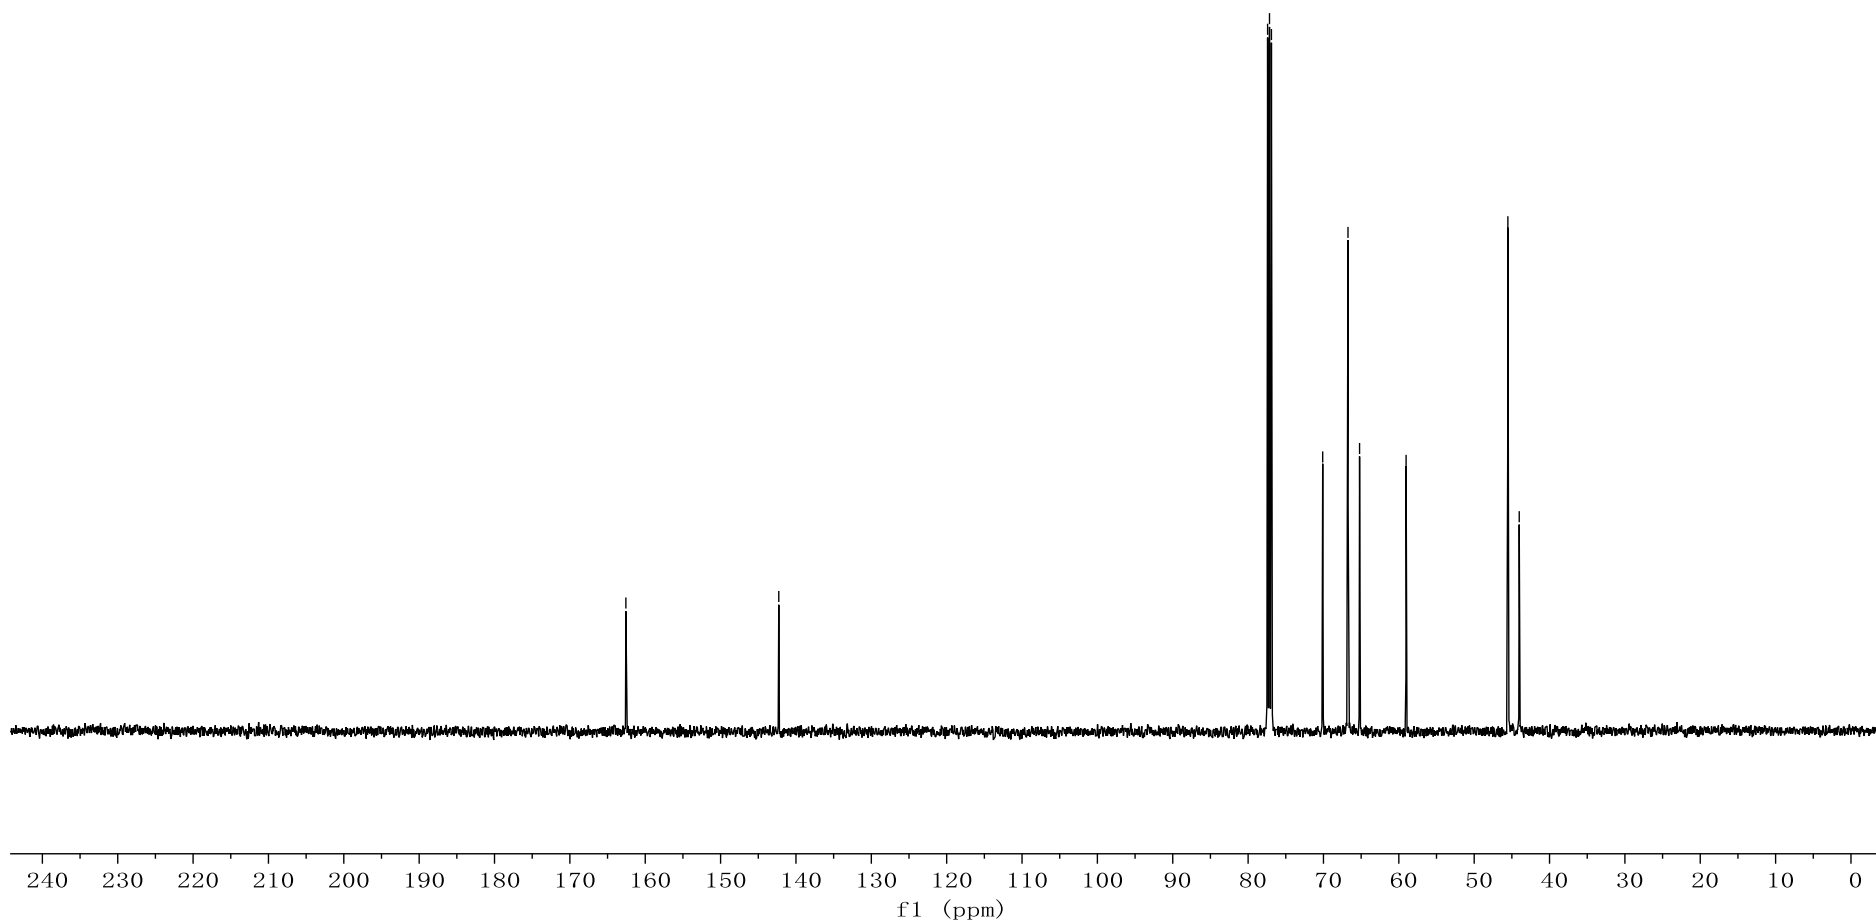

<sup>1</sup>H NMR (500 MHz, CDCl<sub>3</sub>) for 10

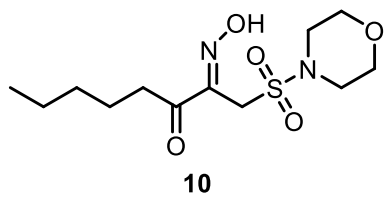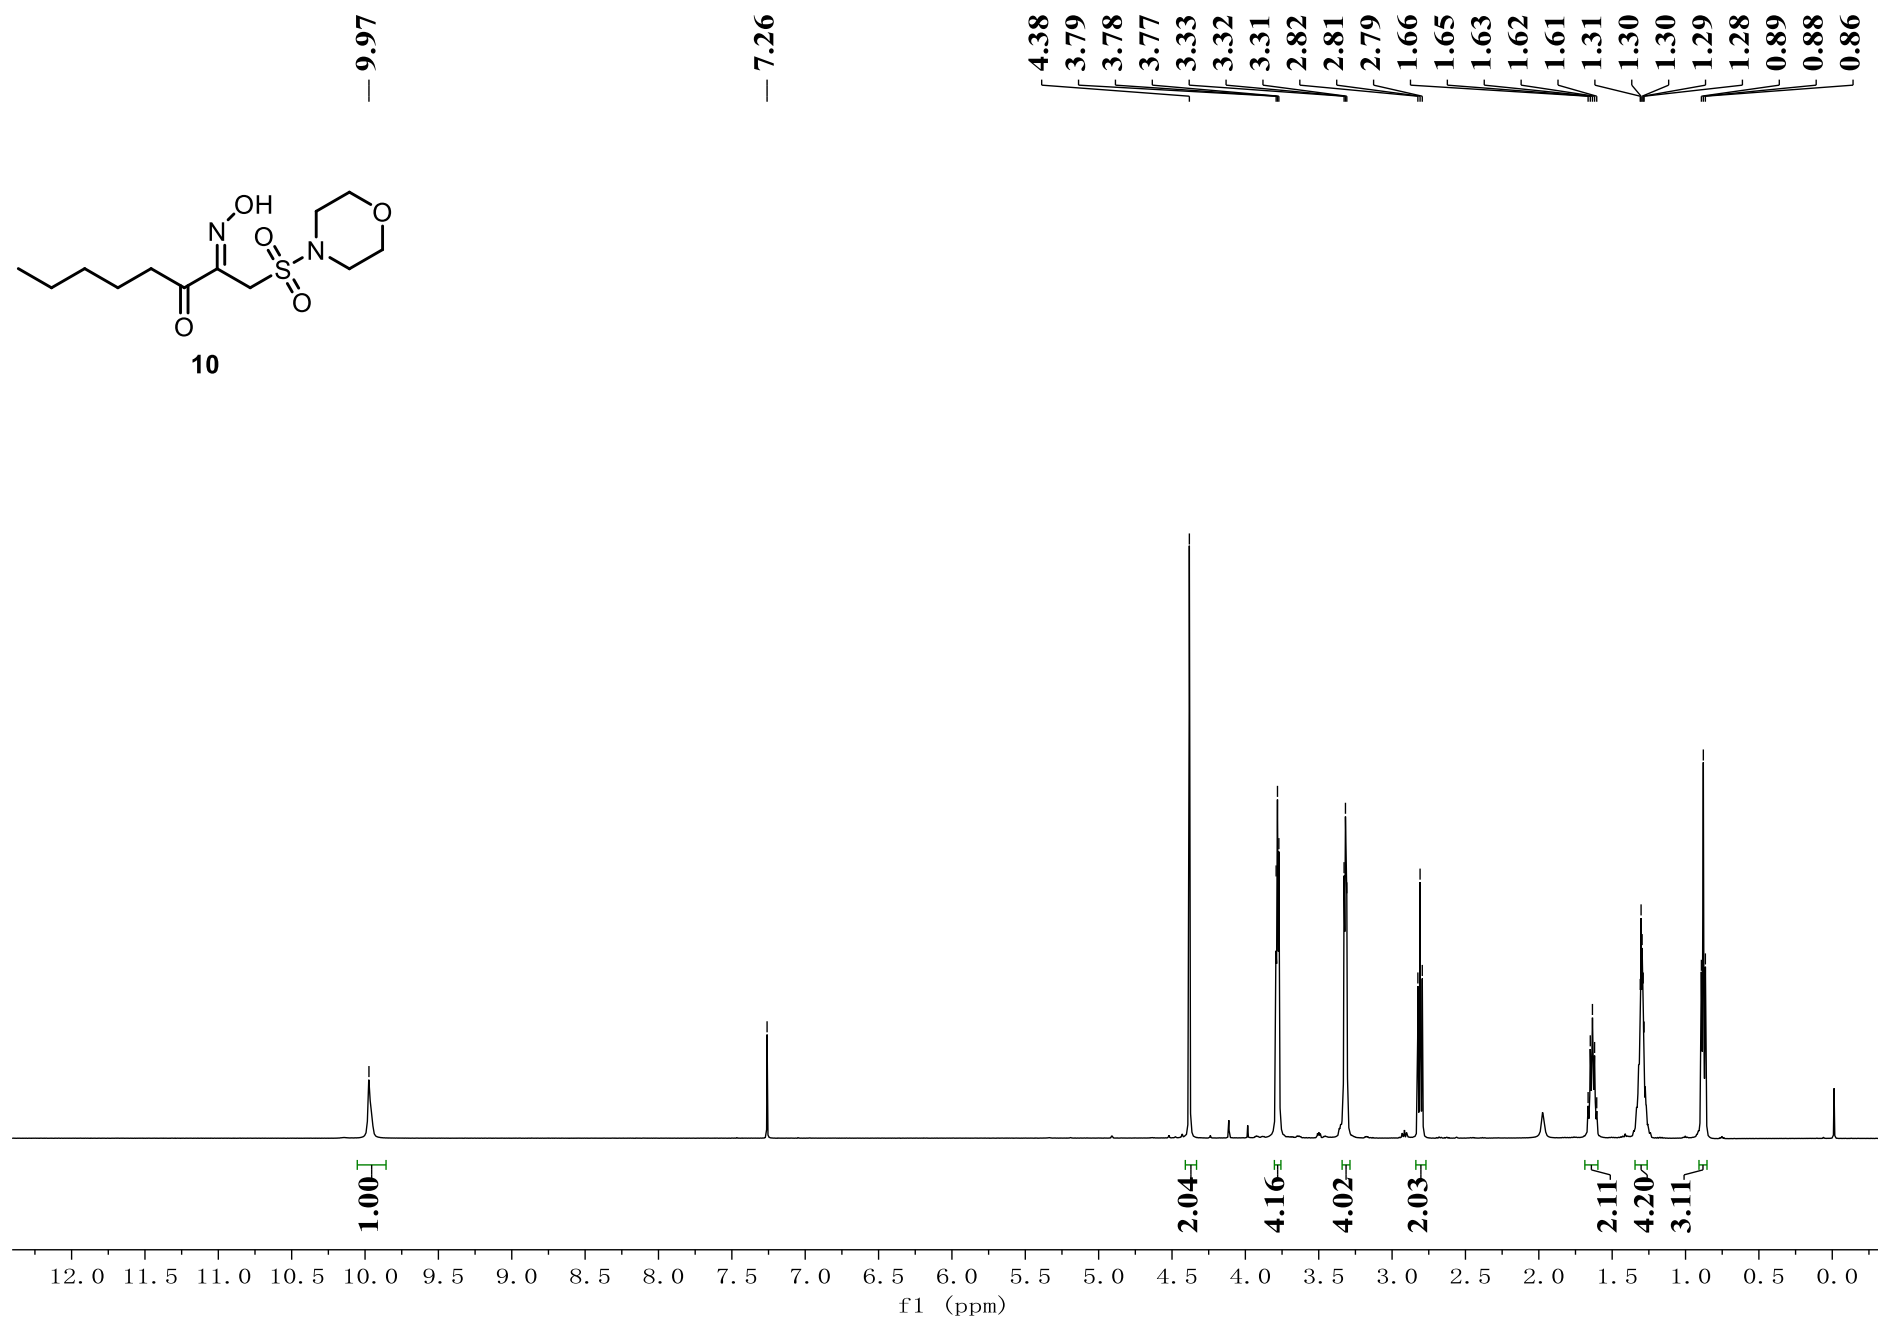

<sup>13</sup>C NMR (125 MHz, CDCl<sub>3</sub>) for 10

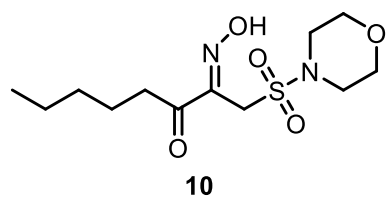

— 197.51

— 148.67

{ 77.41  
77.16  
76.91  
— 66.78

~ 45.55  
~ 41.63  
~ 37.50  
~ 31.45  
~ 23.73  
~ 22.55  
~ 14.06

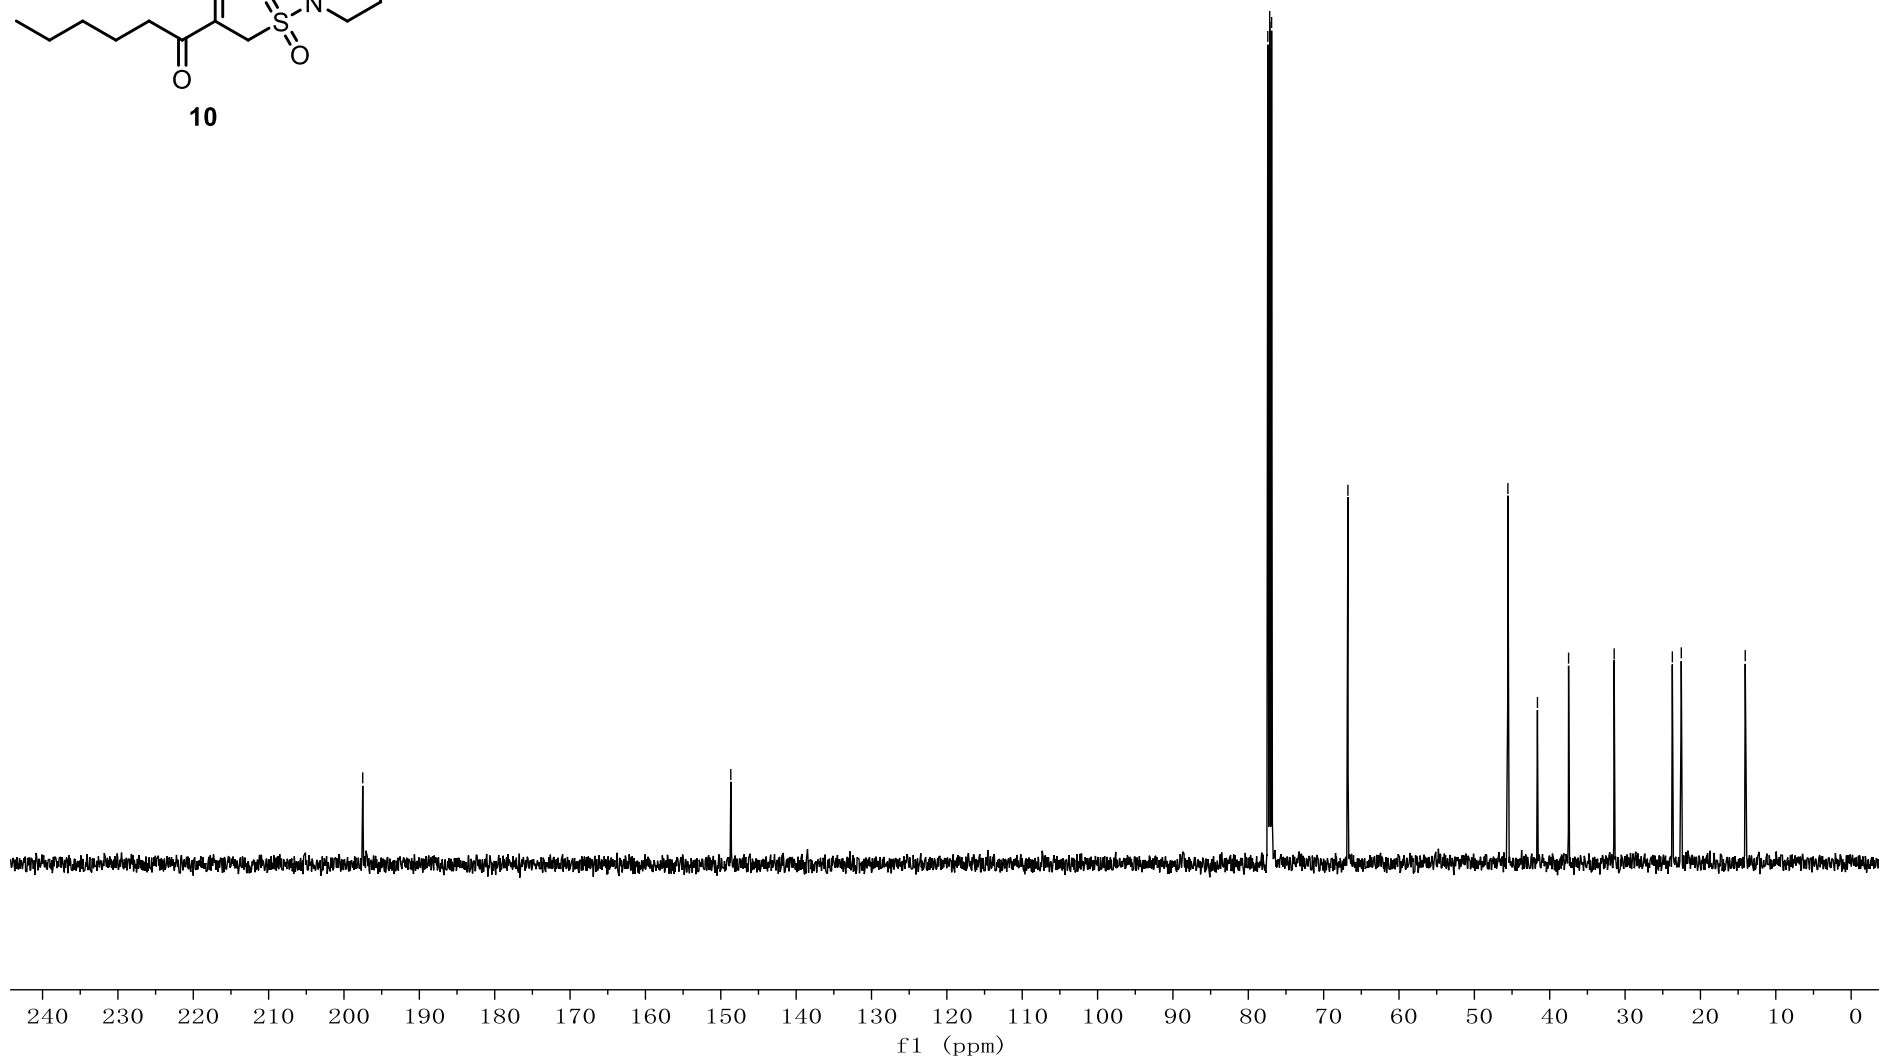

<sup>1</sup>H NMR (500 MHz, CDCl<sub>3</sub>) for 11

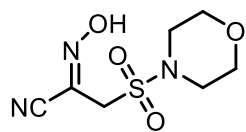

11

~ 7.26  
~ 7.11

— 5.73

4.13  
4.12  
4.11  
3.76  
3.75  
3.74  
3.74  
3.73  
3.72  
3.71  
3.68  
3.67  
3.66

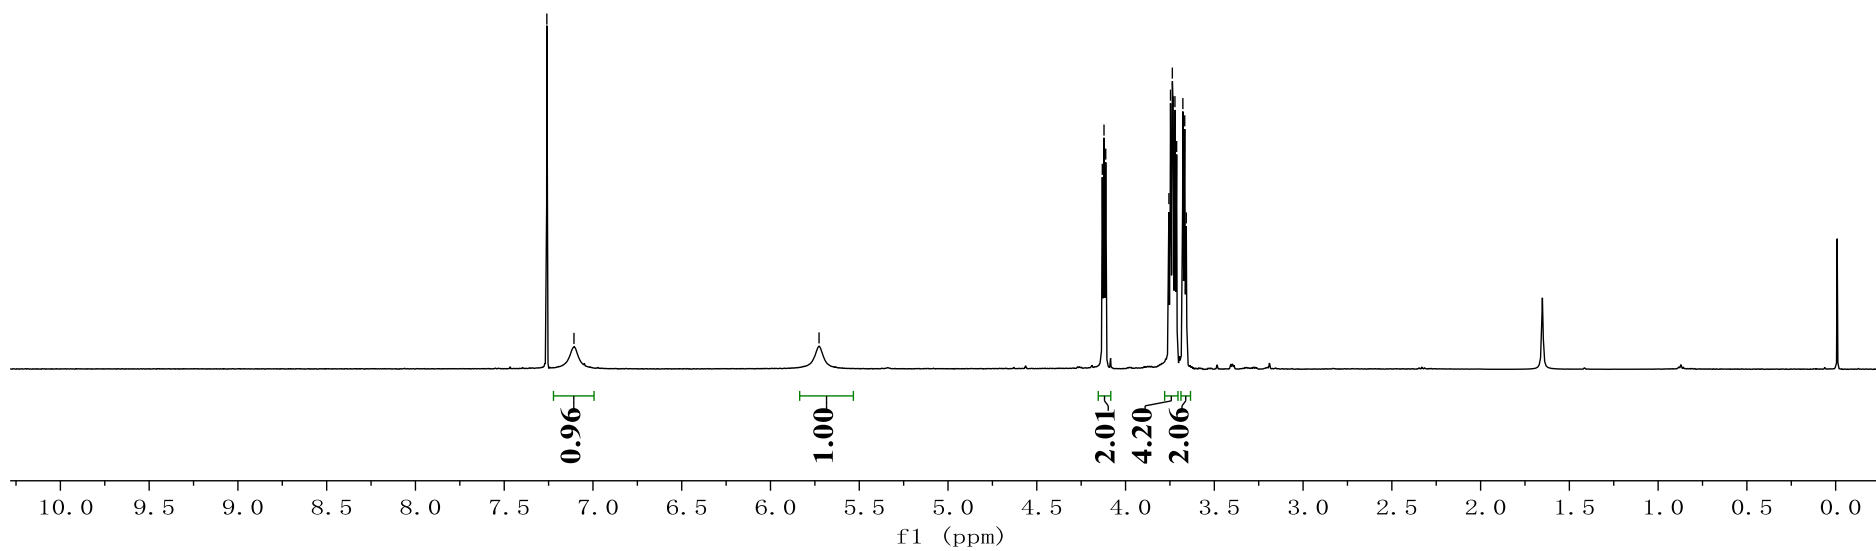

<sup>13</sup>C NMR (125 MHz, CDCl<sub>3</sub>) for 11

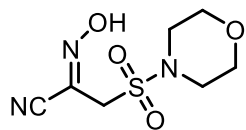

11

~ 163.09  
~ 160.17

77.41  
77.16  
76.91  
67.30  
66.84

~ 47.18  
~ 43.55

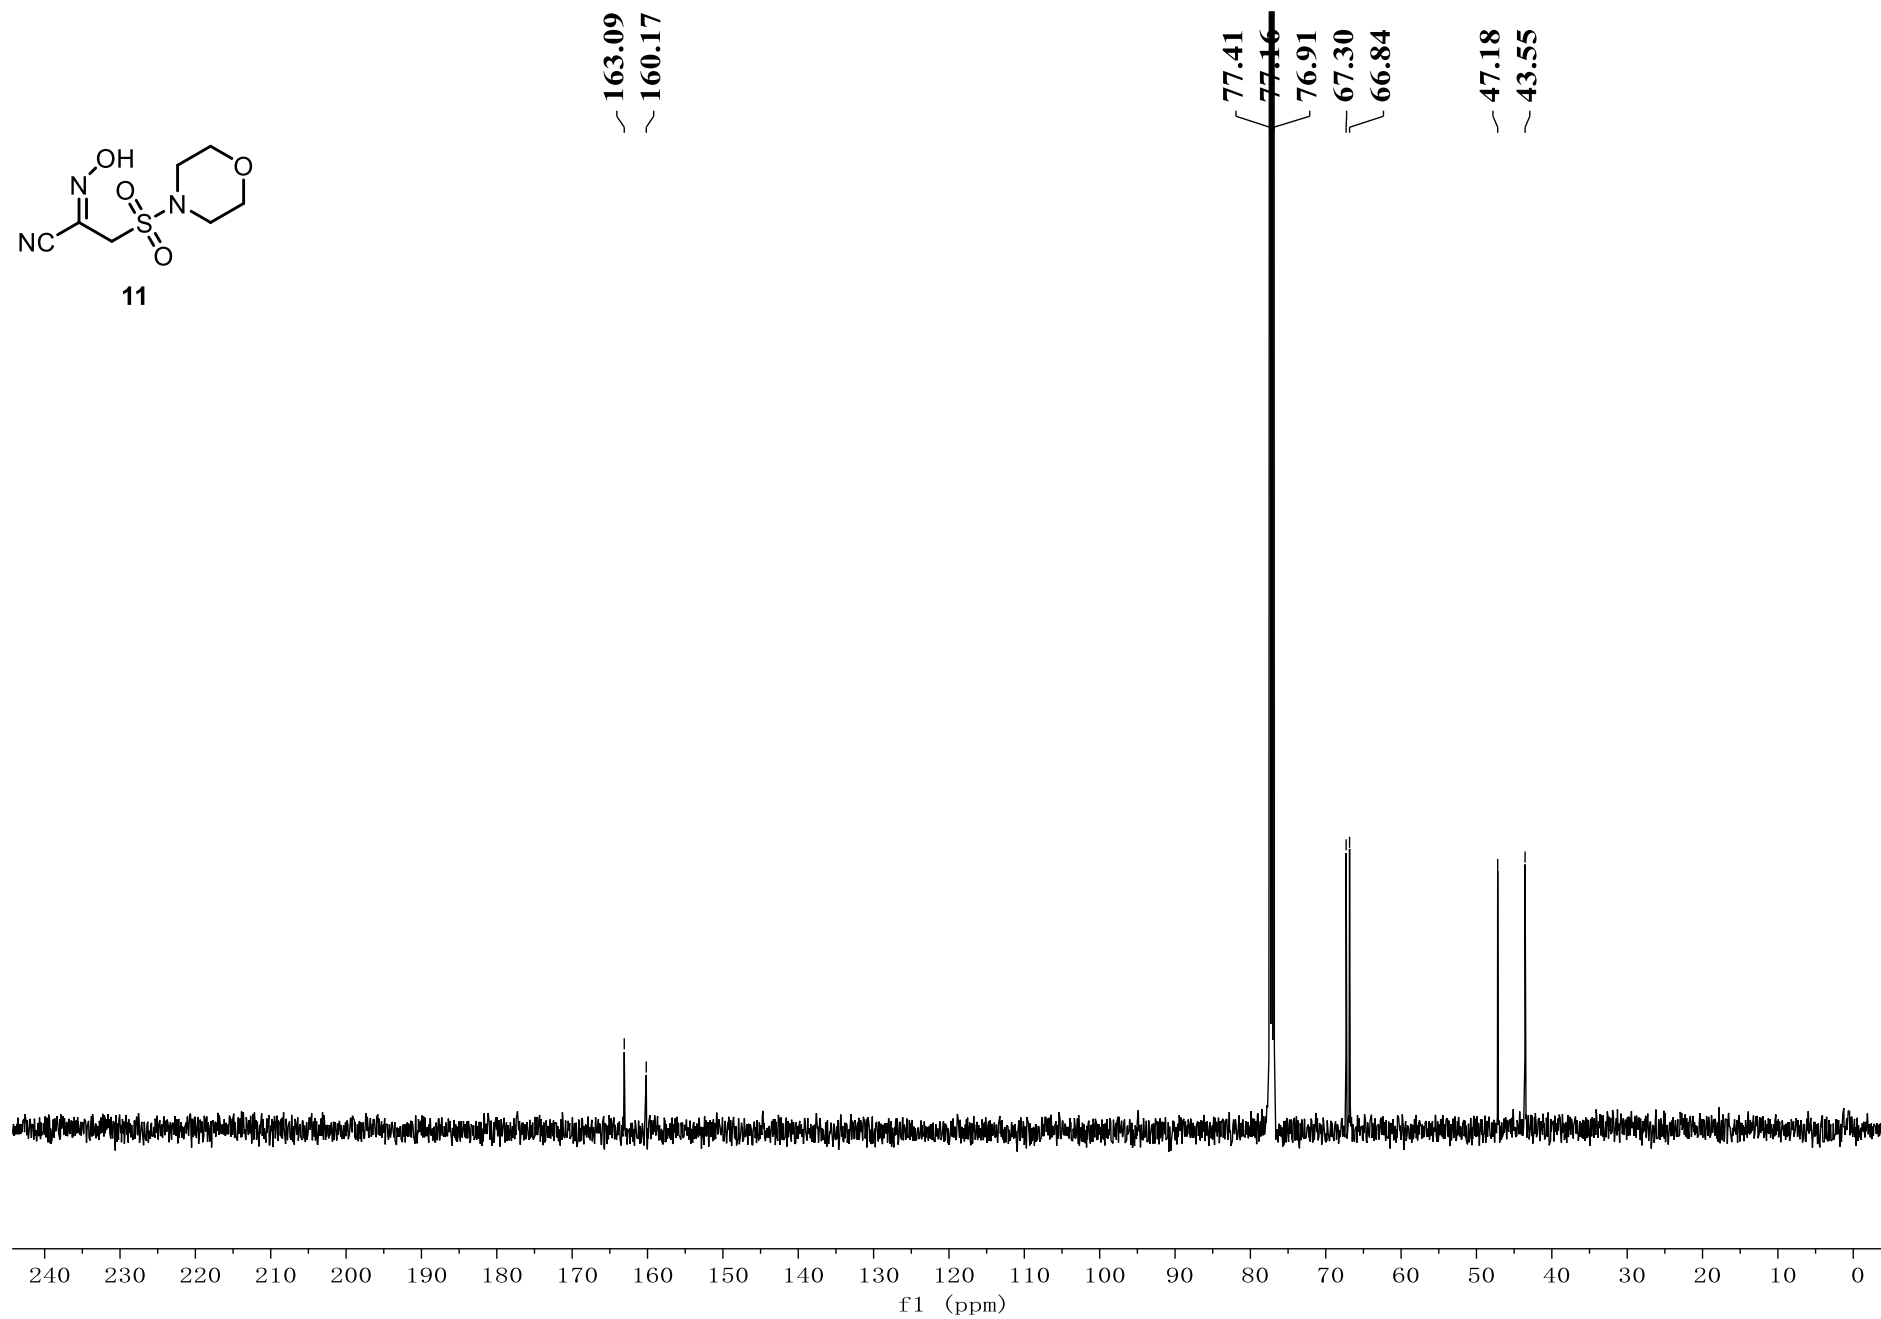



<sup>1</sup>H NMR (500 MHz, CDCl<sub>3</sub>) for 12

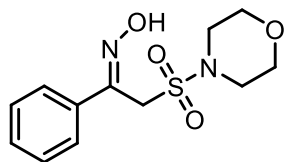

12

9.51

7.75  
7.75  
7.74  
7.74  
7.73  
7.43  
7.43  
7.42  
7.42  
7.41  
7.26

4.58

3.72  
3.71  
3.70  
3.34  
3.33  
3.32

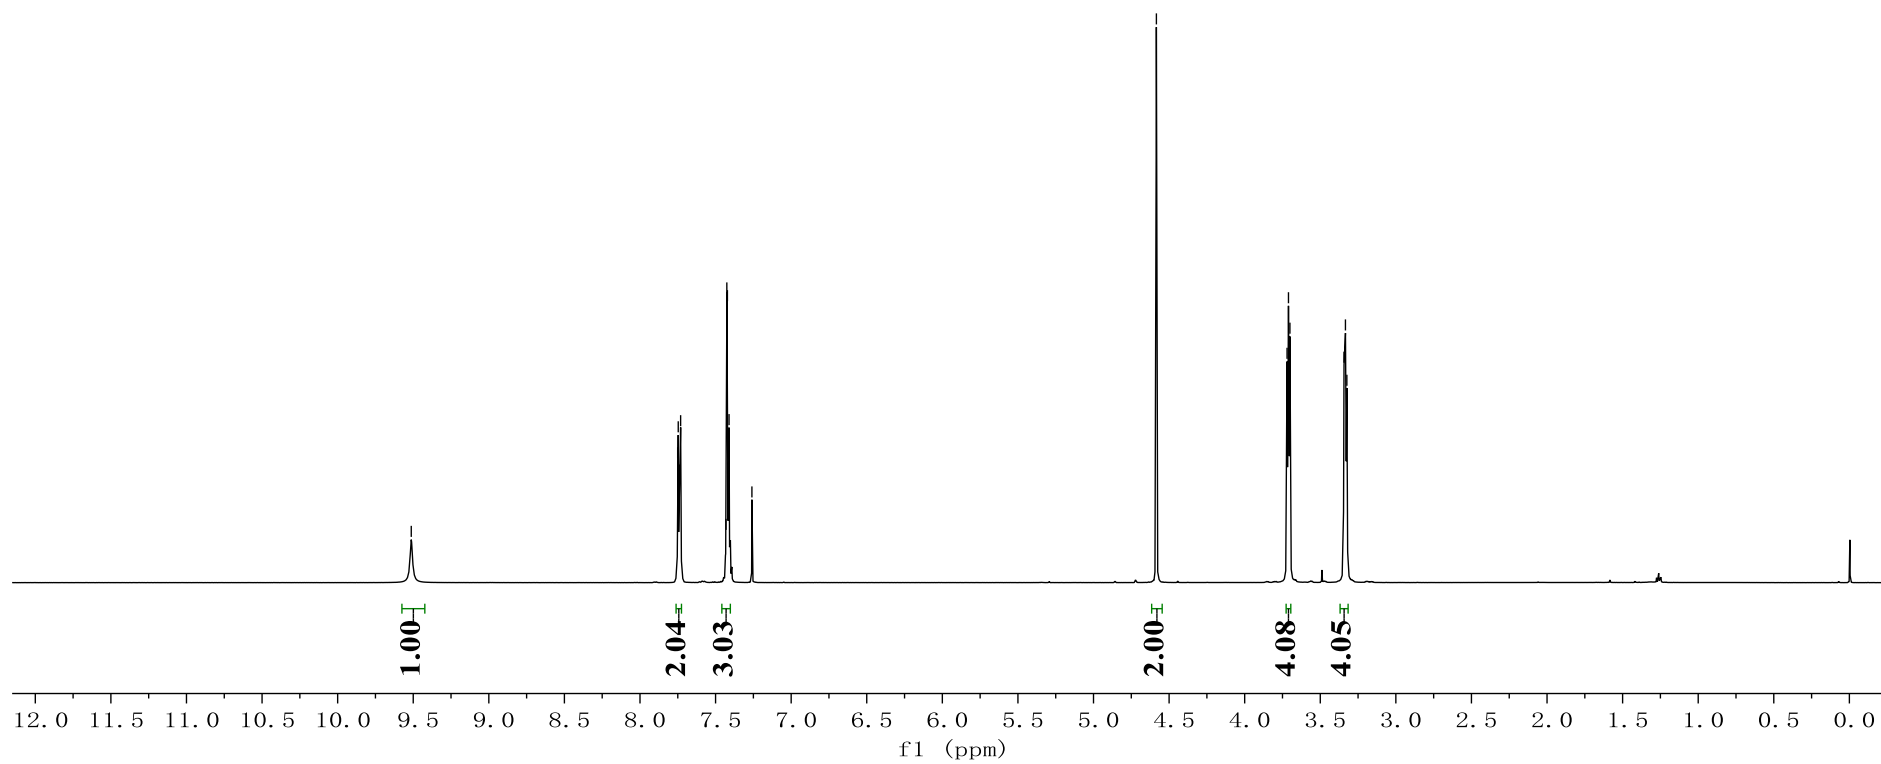

<sup>13</sup>C NMR (125 MHz, CDCl<sub>3</sub>) for 12

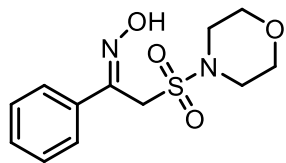

12

— 148.70  
/ 133.83  
/ 130.23  
/ 128.84  
/ 126.73

77.41  
/ 77.16  
/ 76.91  
— 66.88

45.86  
/ 45.62

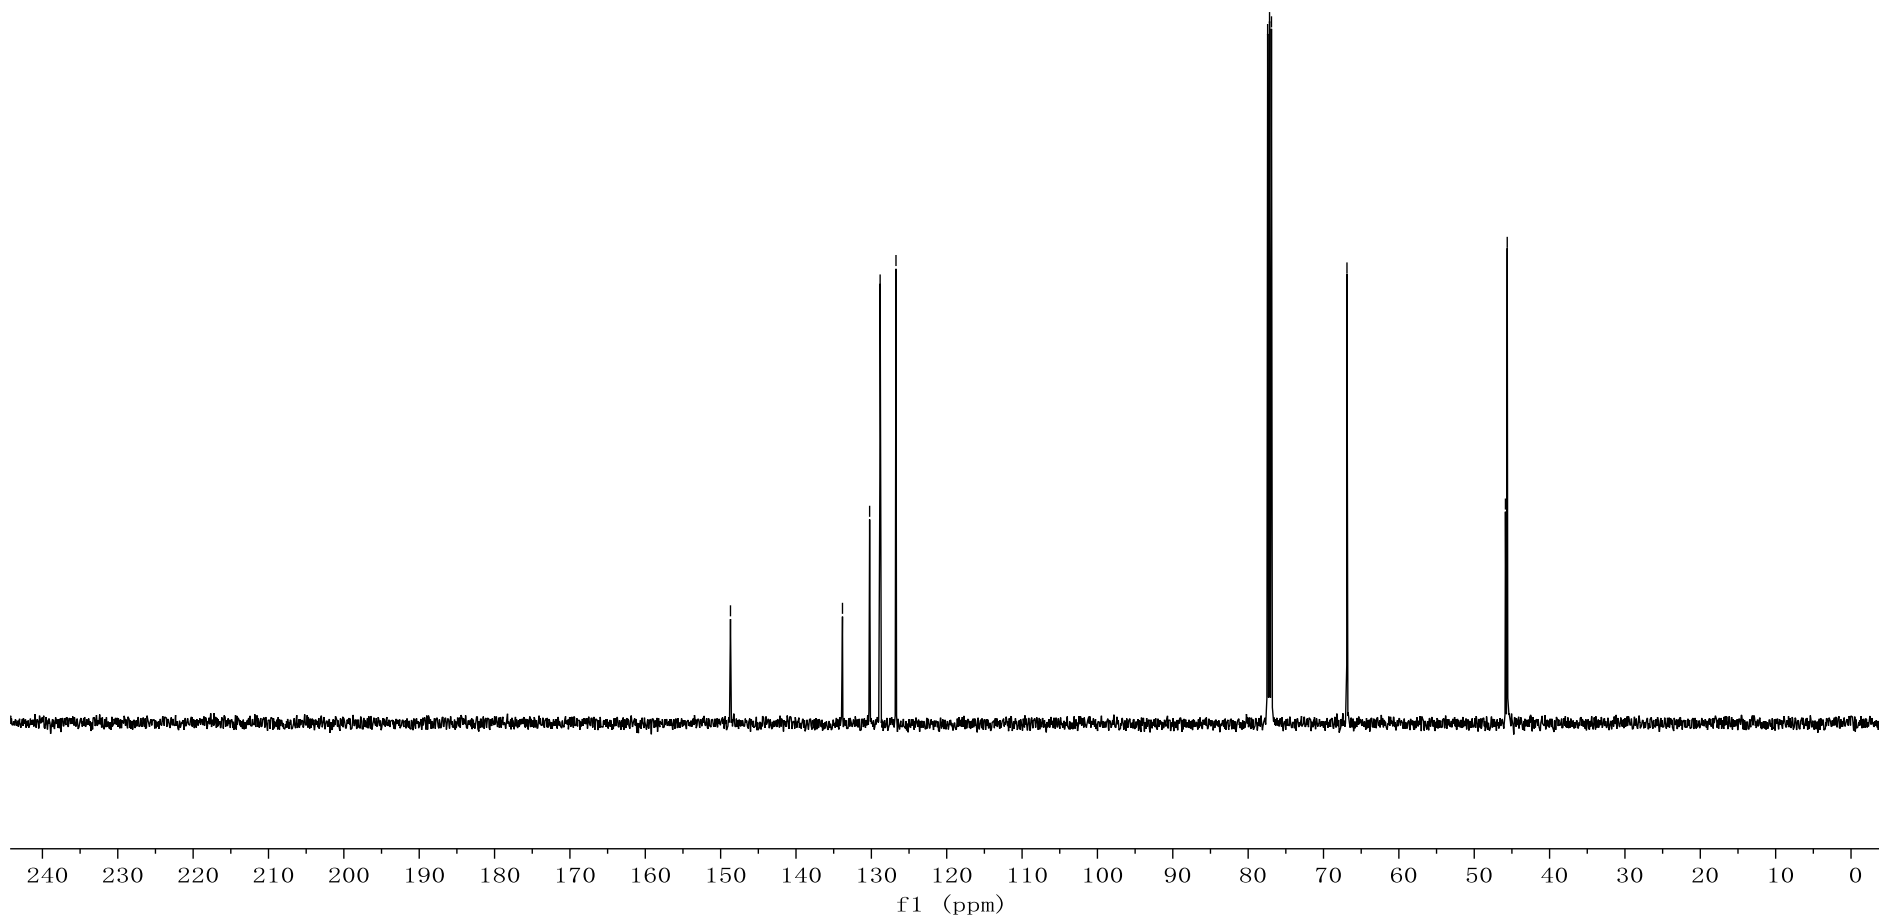

<sup>1</sup>H NMR (500 MHz, CDCl<sub>3</sub>) for 13

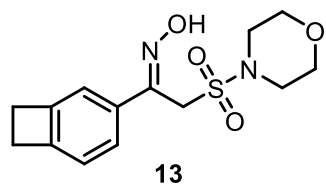

7.55  
7.55  
7.54  
7.53  
7.40  
7.40  
7.40  
7.36  
7.36  
7.35  
7.34  
7.27  
7.26  
7.13  
7.12  
7.09  
7.07

4.57  
4.21  
3.70  
3.69  
3.68  
3.67  
3.66  
3.48  
3.33  
3.33  
3.32  
3.31  
3.31  
3.30  
3.30  
3.29  
3.29  
3.20  
3.20  
3.18

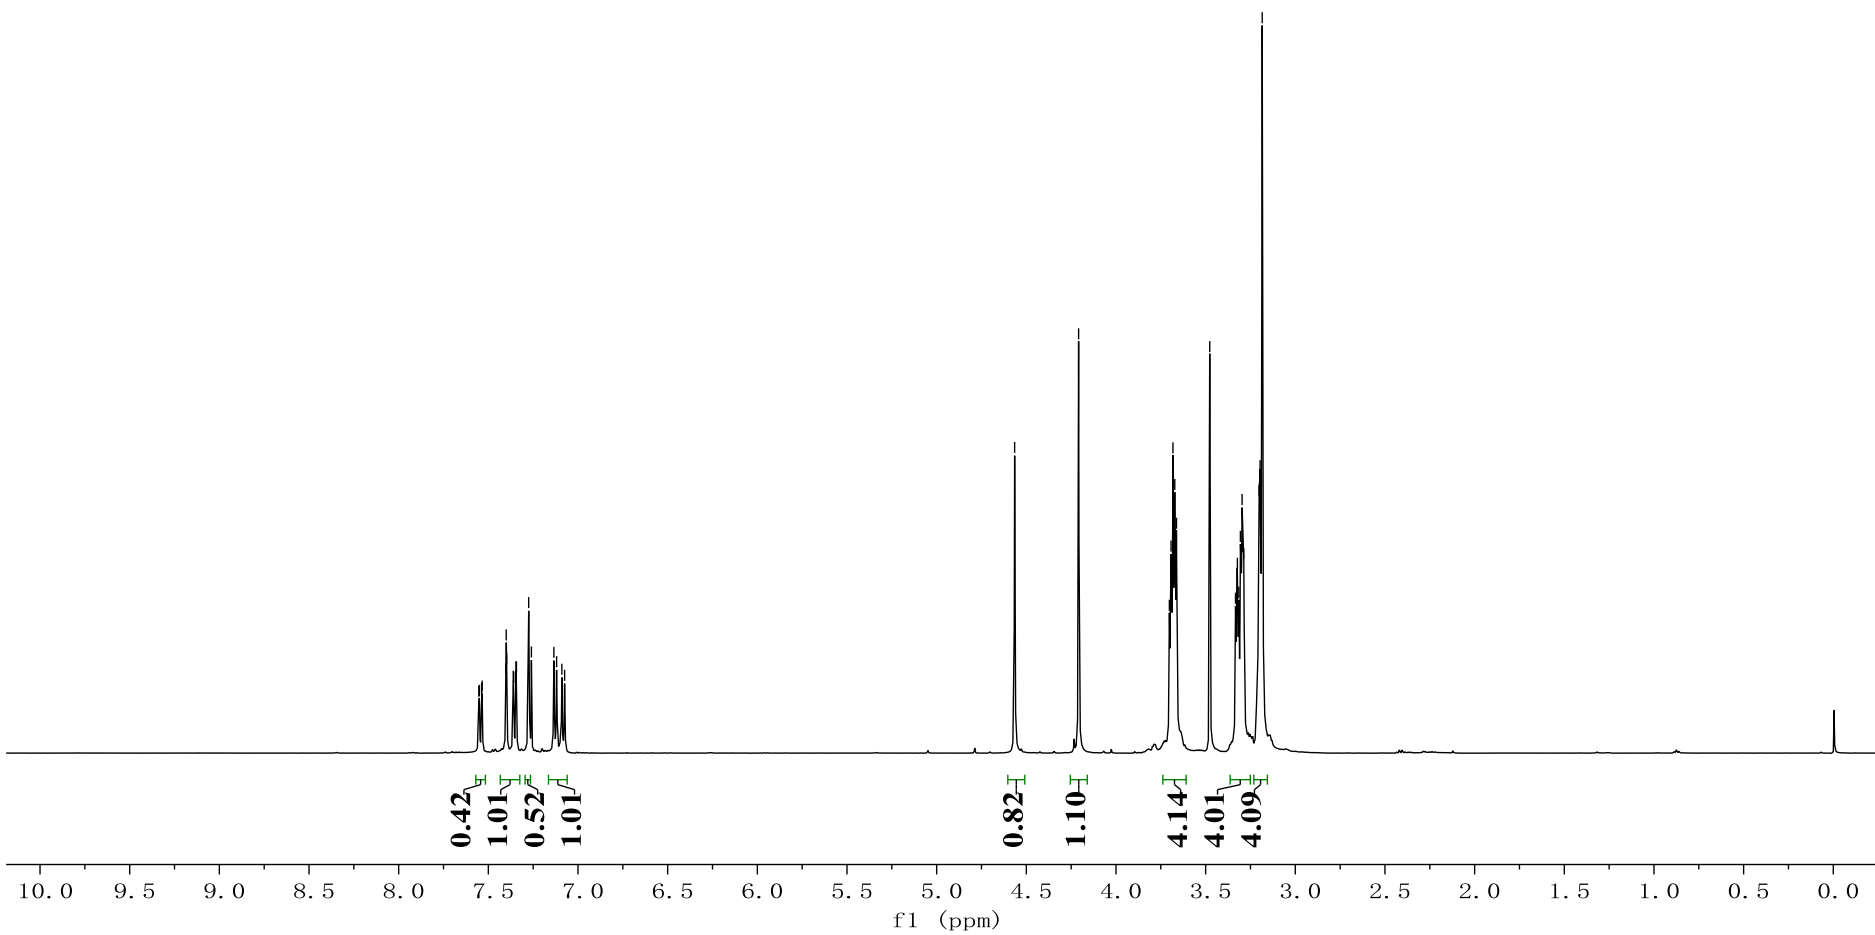

<sup>13</sup>C NMR (125 MHz, CDCl<sub>3</sub>) for 13

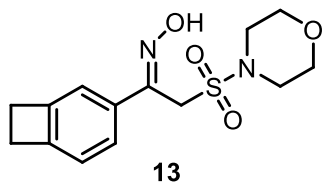

149.48  
149.35  
148.44  
148.12  
146.30  
145.88  
132.66  
129.96  
126.93  
125.74  
122.89  
122.73  
122.59  
120.88

77.41  
77.16  
76.91  
66.85  
66.79  
55.80  
46.16  
46.00  
45.60  
29.92  
29.79  
29.74  
29.55

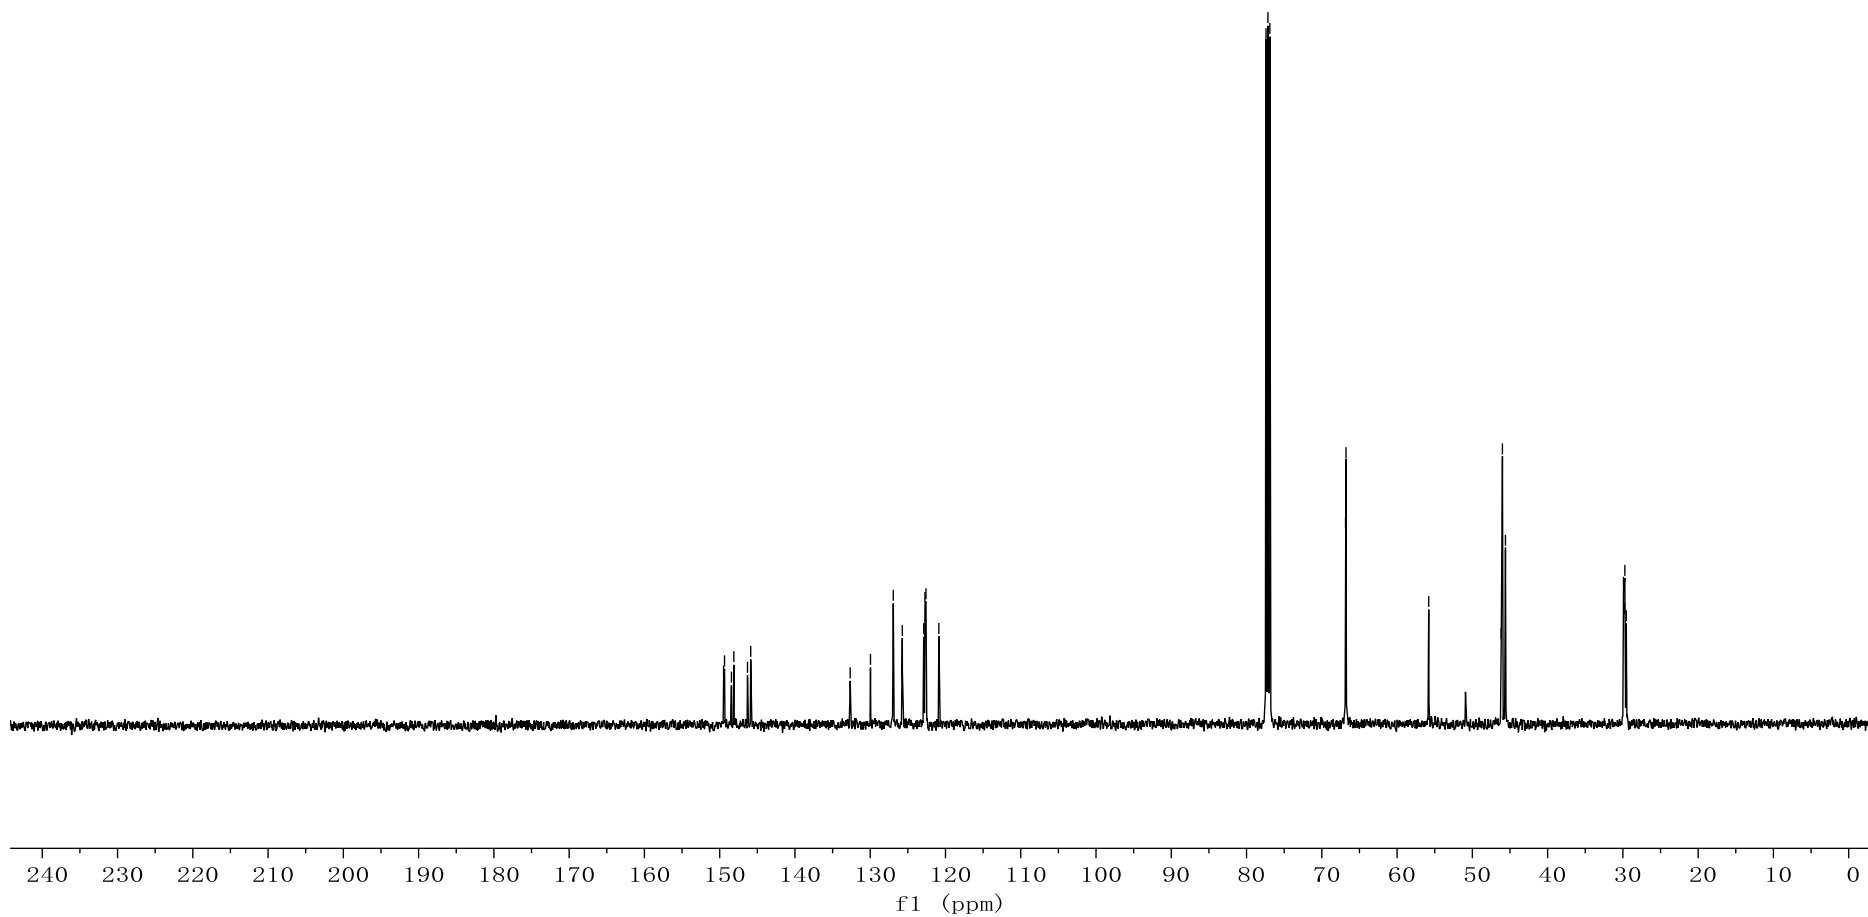

<sup>1</sup>H NMR (500 MHz, CDCl<sub>3</sub>) for 14

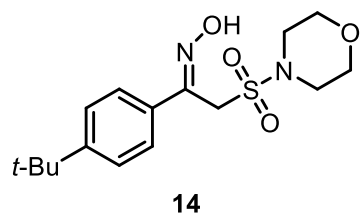

— 9.53

7.69  
7.68  
7.44  
7.42  
7.26

— 4.58

3.72  
3.71  
3.70  
3.35  
3.35  
3.34

— 1.32

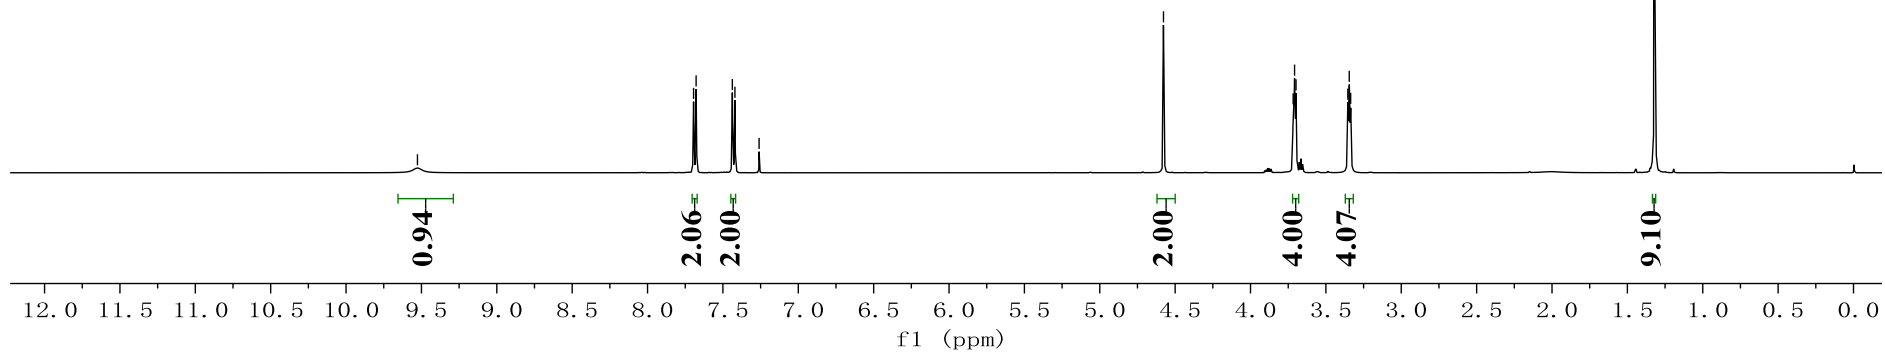

<sup>13</sup>C NMR (125 MHz, CDCl<sub>3</sub>) for 14

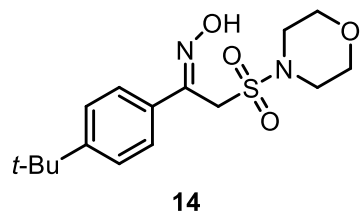

— 153.51  
— 148.52

∩ 130.91  
∩ 126.44  
∩ 125.80

∩ 77.41  
∩ 77.16  
∩ 76.91  
— 66.88

∩ 45.85  
∩ 45.63  
— 34.89  
— 31.27

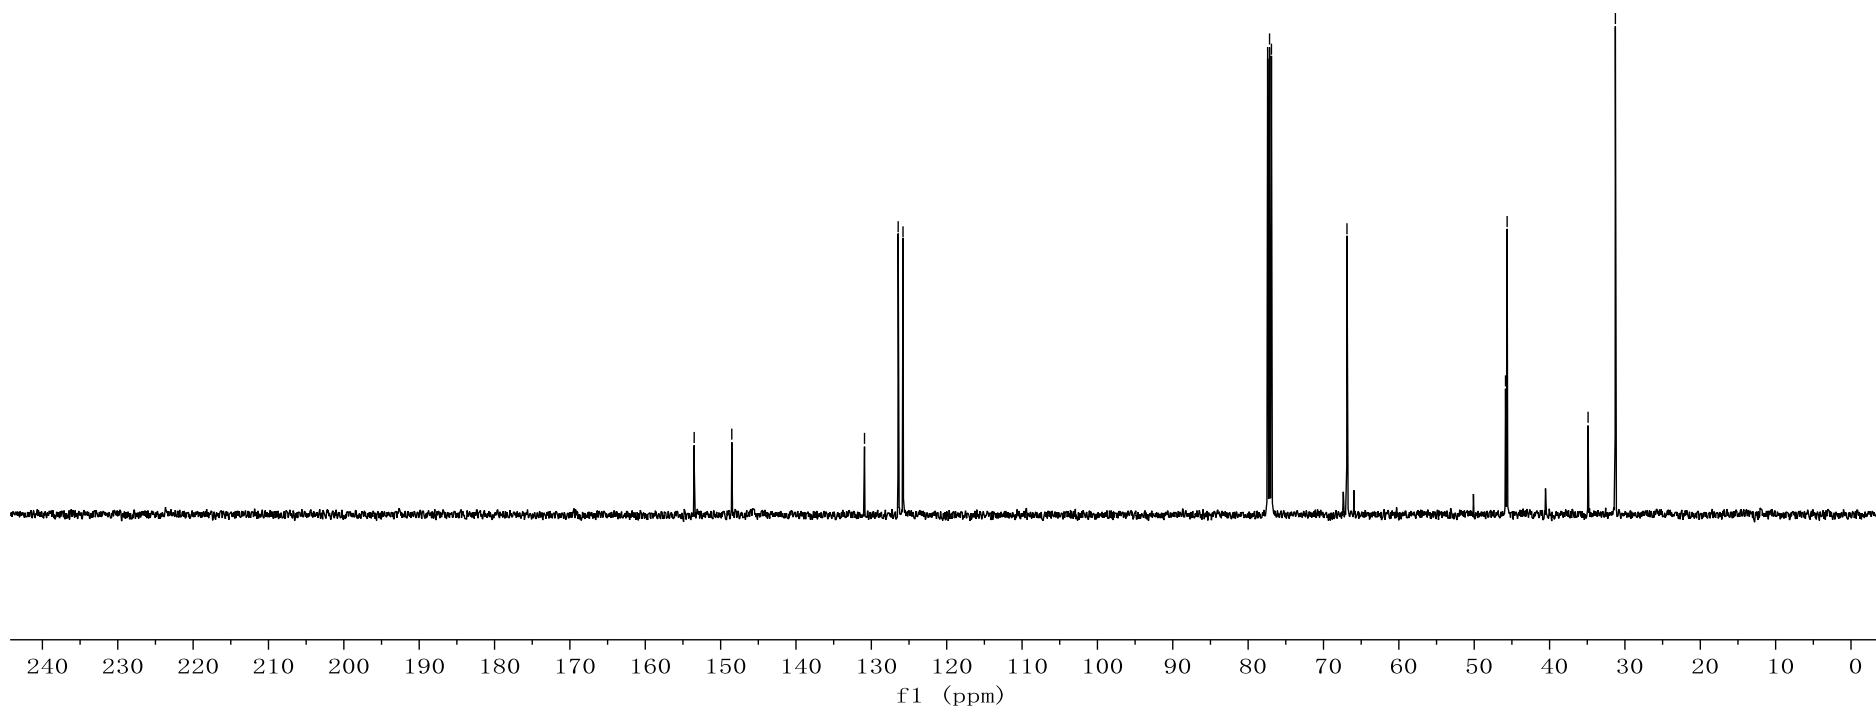

<sup>1</sup>H NMR (500 MHz, DMSO-*d*<sub>6</sub>) for 15

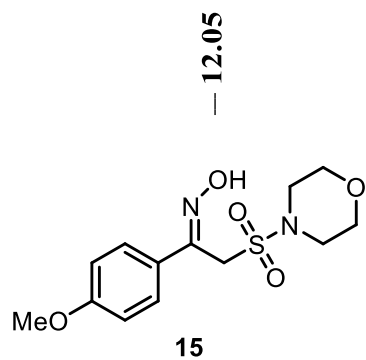

12.05  
7.70 7.70 7.68 7.68 6.97 6.97 6.95  
4.66 3.78 3.59 3.58 3.57 3.39 3.17 3.16 3.15 2.50

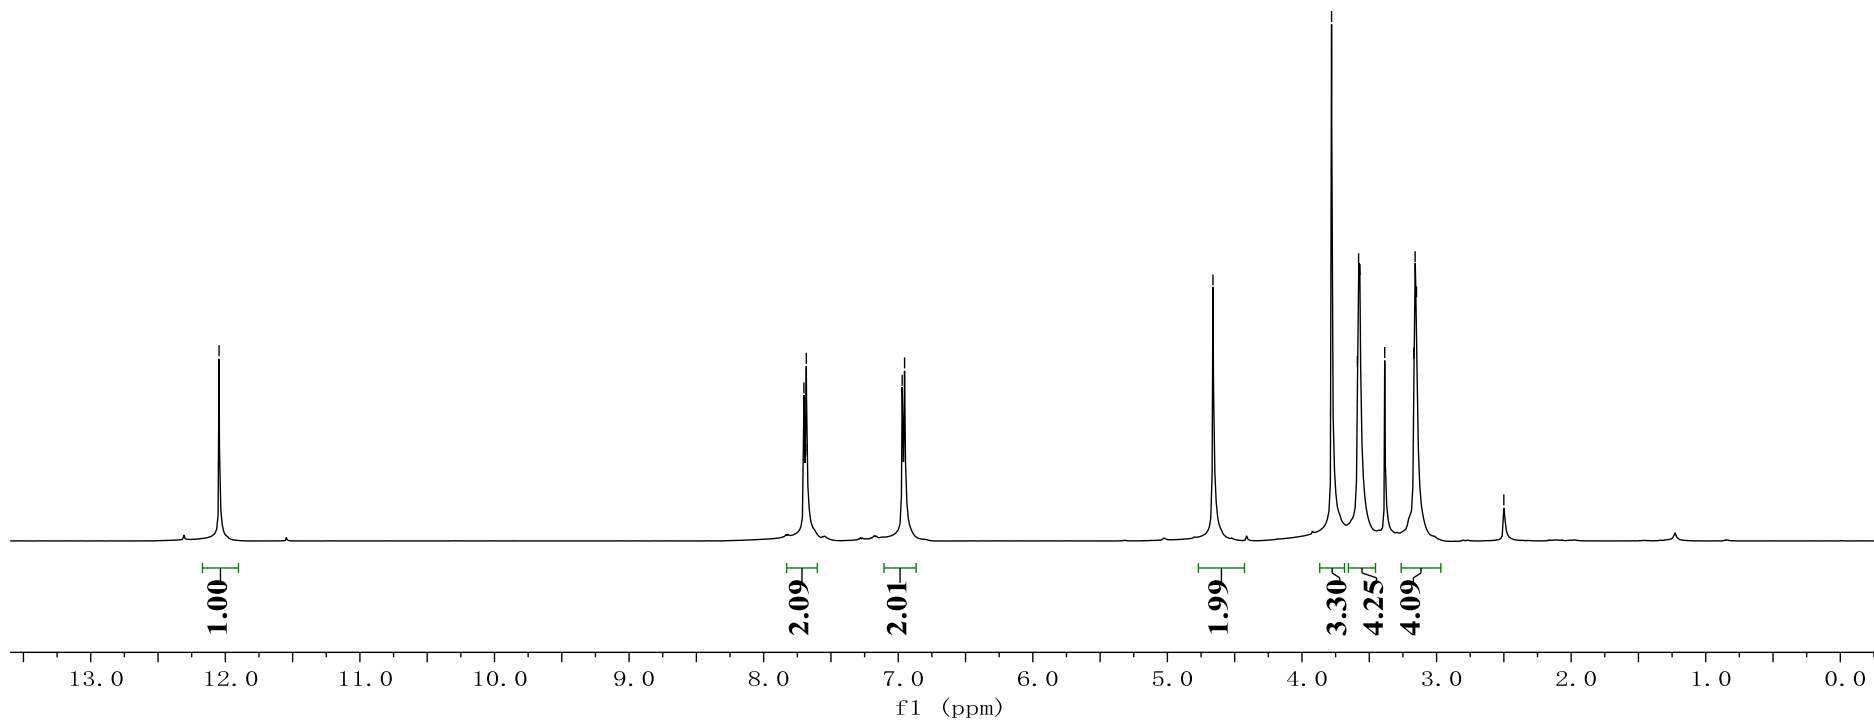

<sup>13</sup>C NMR (125 MHz, DMSO-*d*<sub>6</sub>) for 15

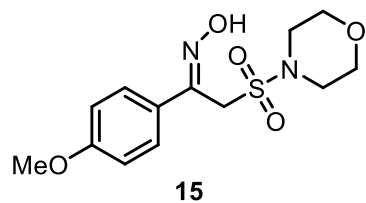

- 160.05
- 146.07
- { 127.87
- { 127.25
- 113.73
- 65.91
- 55.24
- ↙ 45.26
- ↘ 43.99
- 40.02
- 39.85
- 39.69
- 39.52
- 39.35
- 39.19
- 39.02

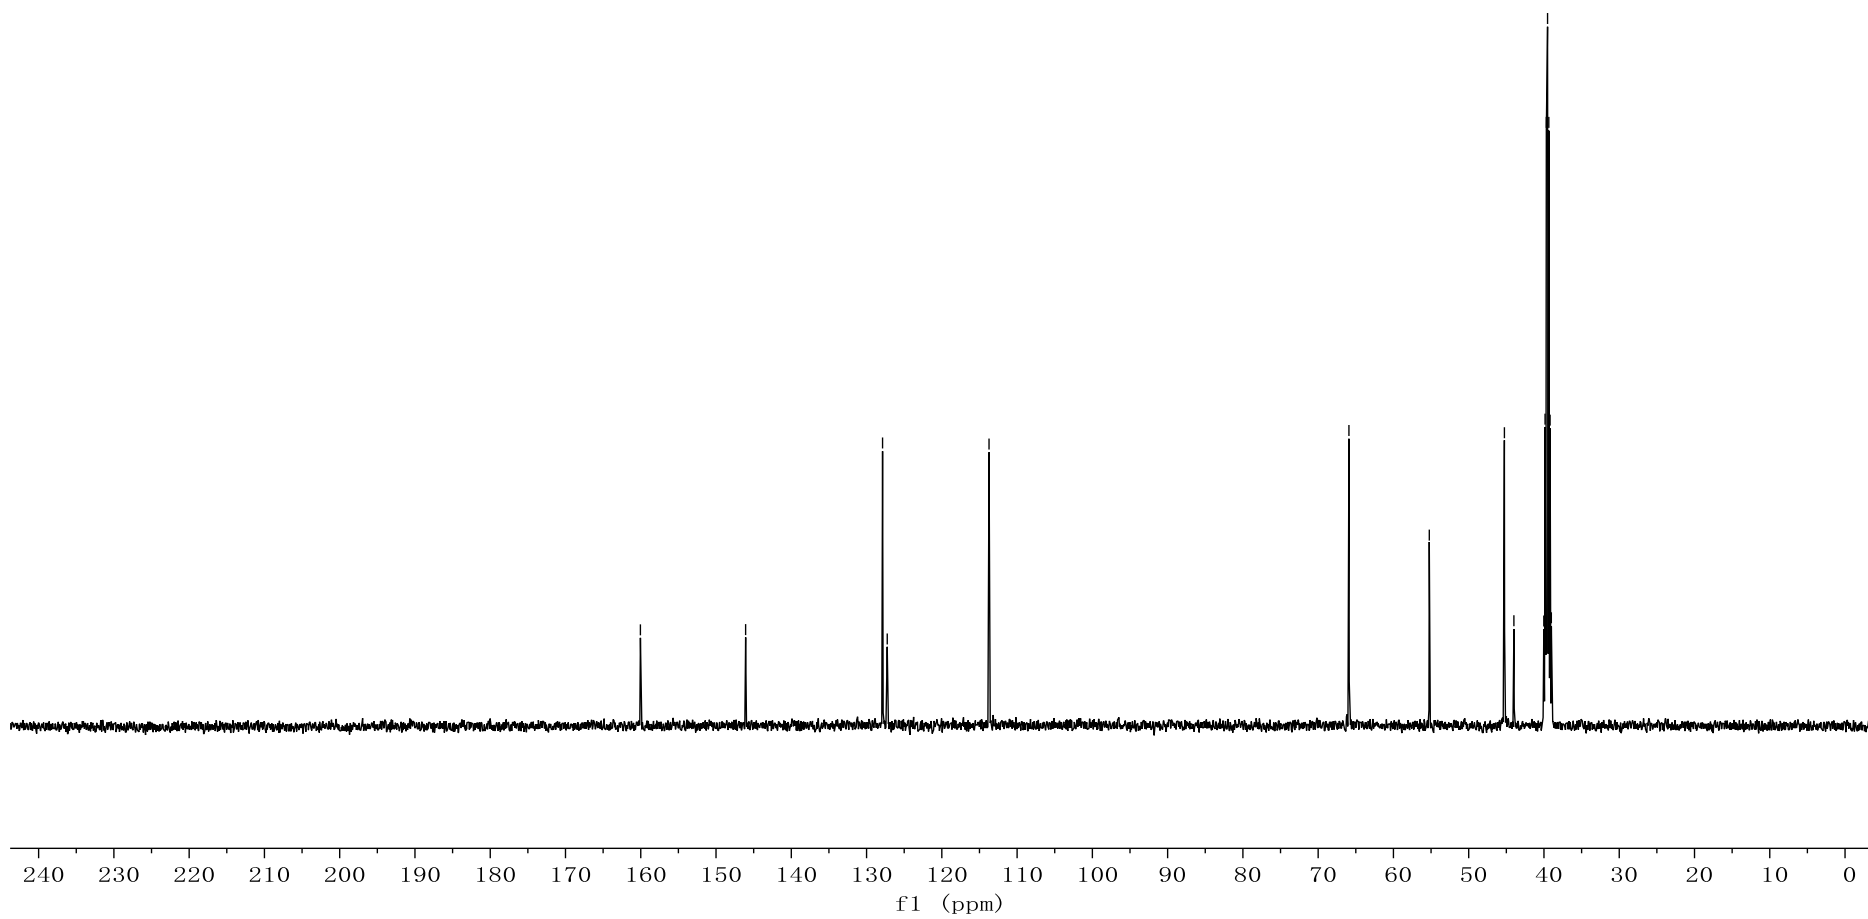



<sup>1</sup>H NMR (500 MHz, CD<sub>3</sub>CN) for 16

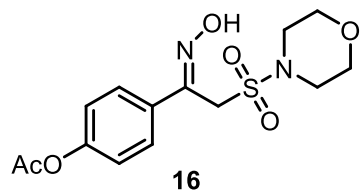

— 9.94

{ 7.77  
7.75

{ 7.15  
7.13

— 4.57

{ 3.63  
3.62  
3.61

{ 3.23  
3.22  
3.21

{ 2.26  
2.24

{ 1.95  
1.95

{ 1.94  
1.93  
1.93  
1.93

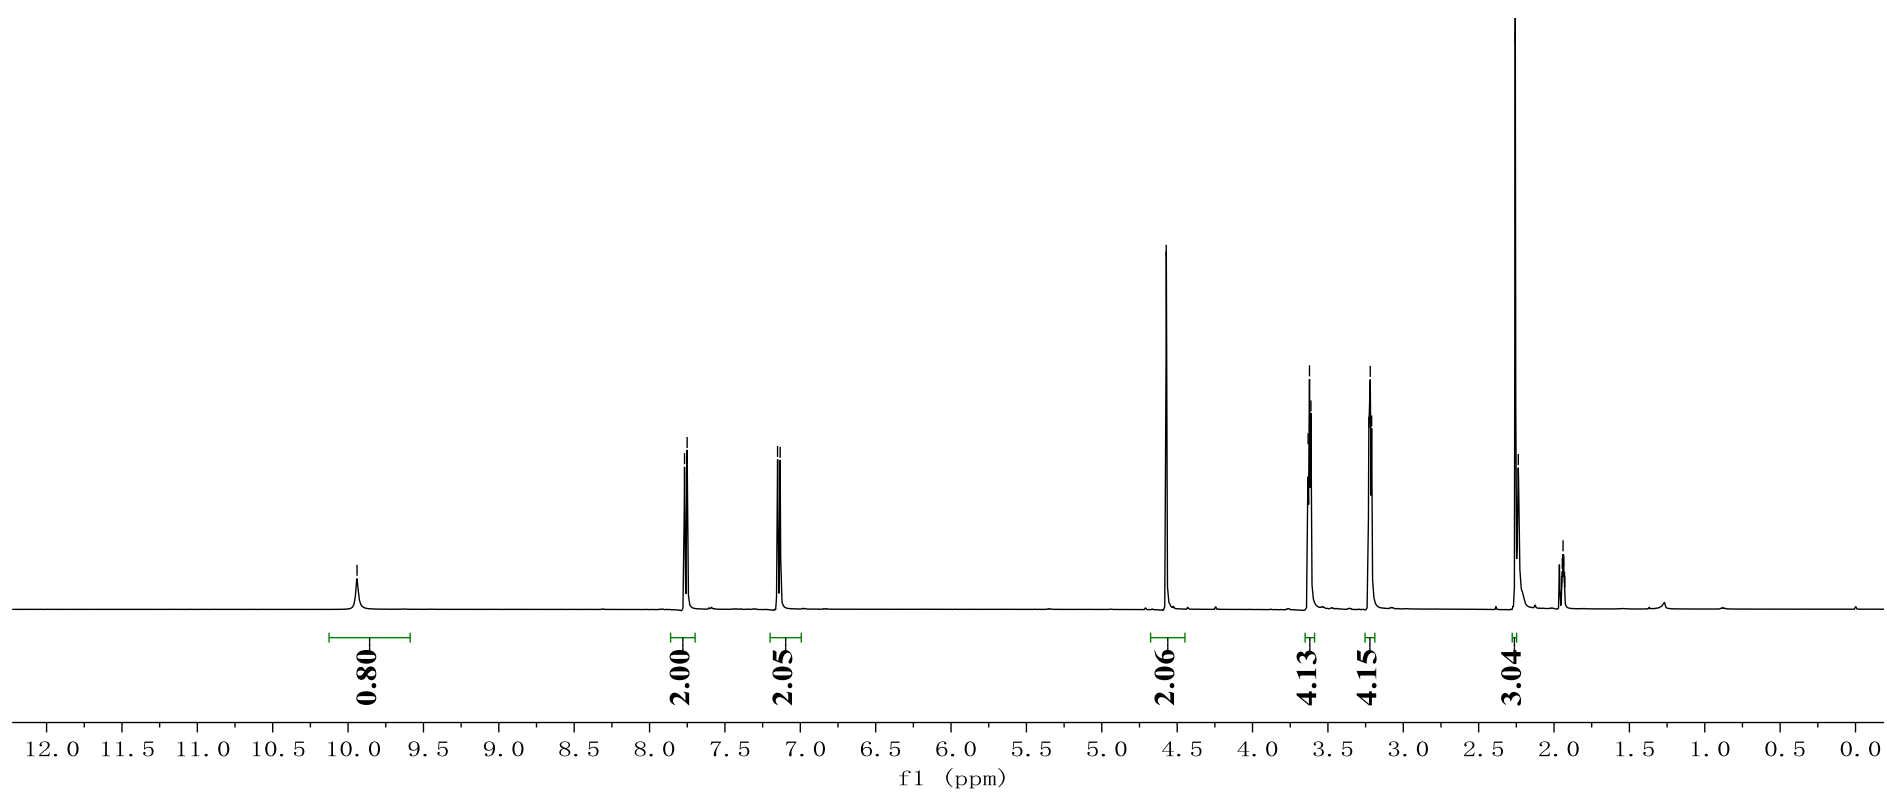

<sup>13</sup>C NMR (125 MHz, CD<sub>3</sub>CN) for 16

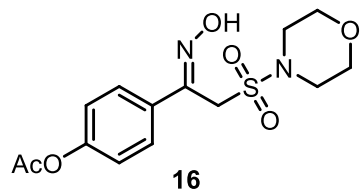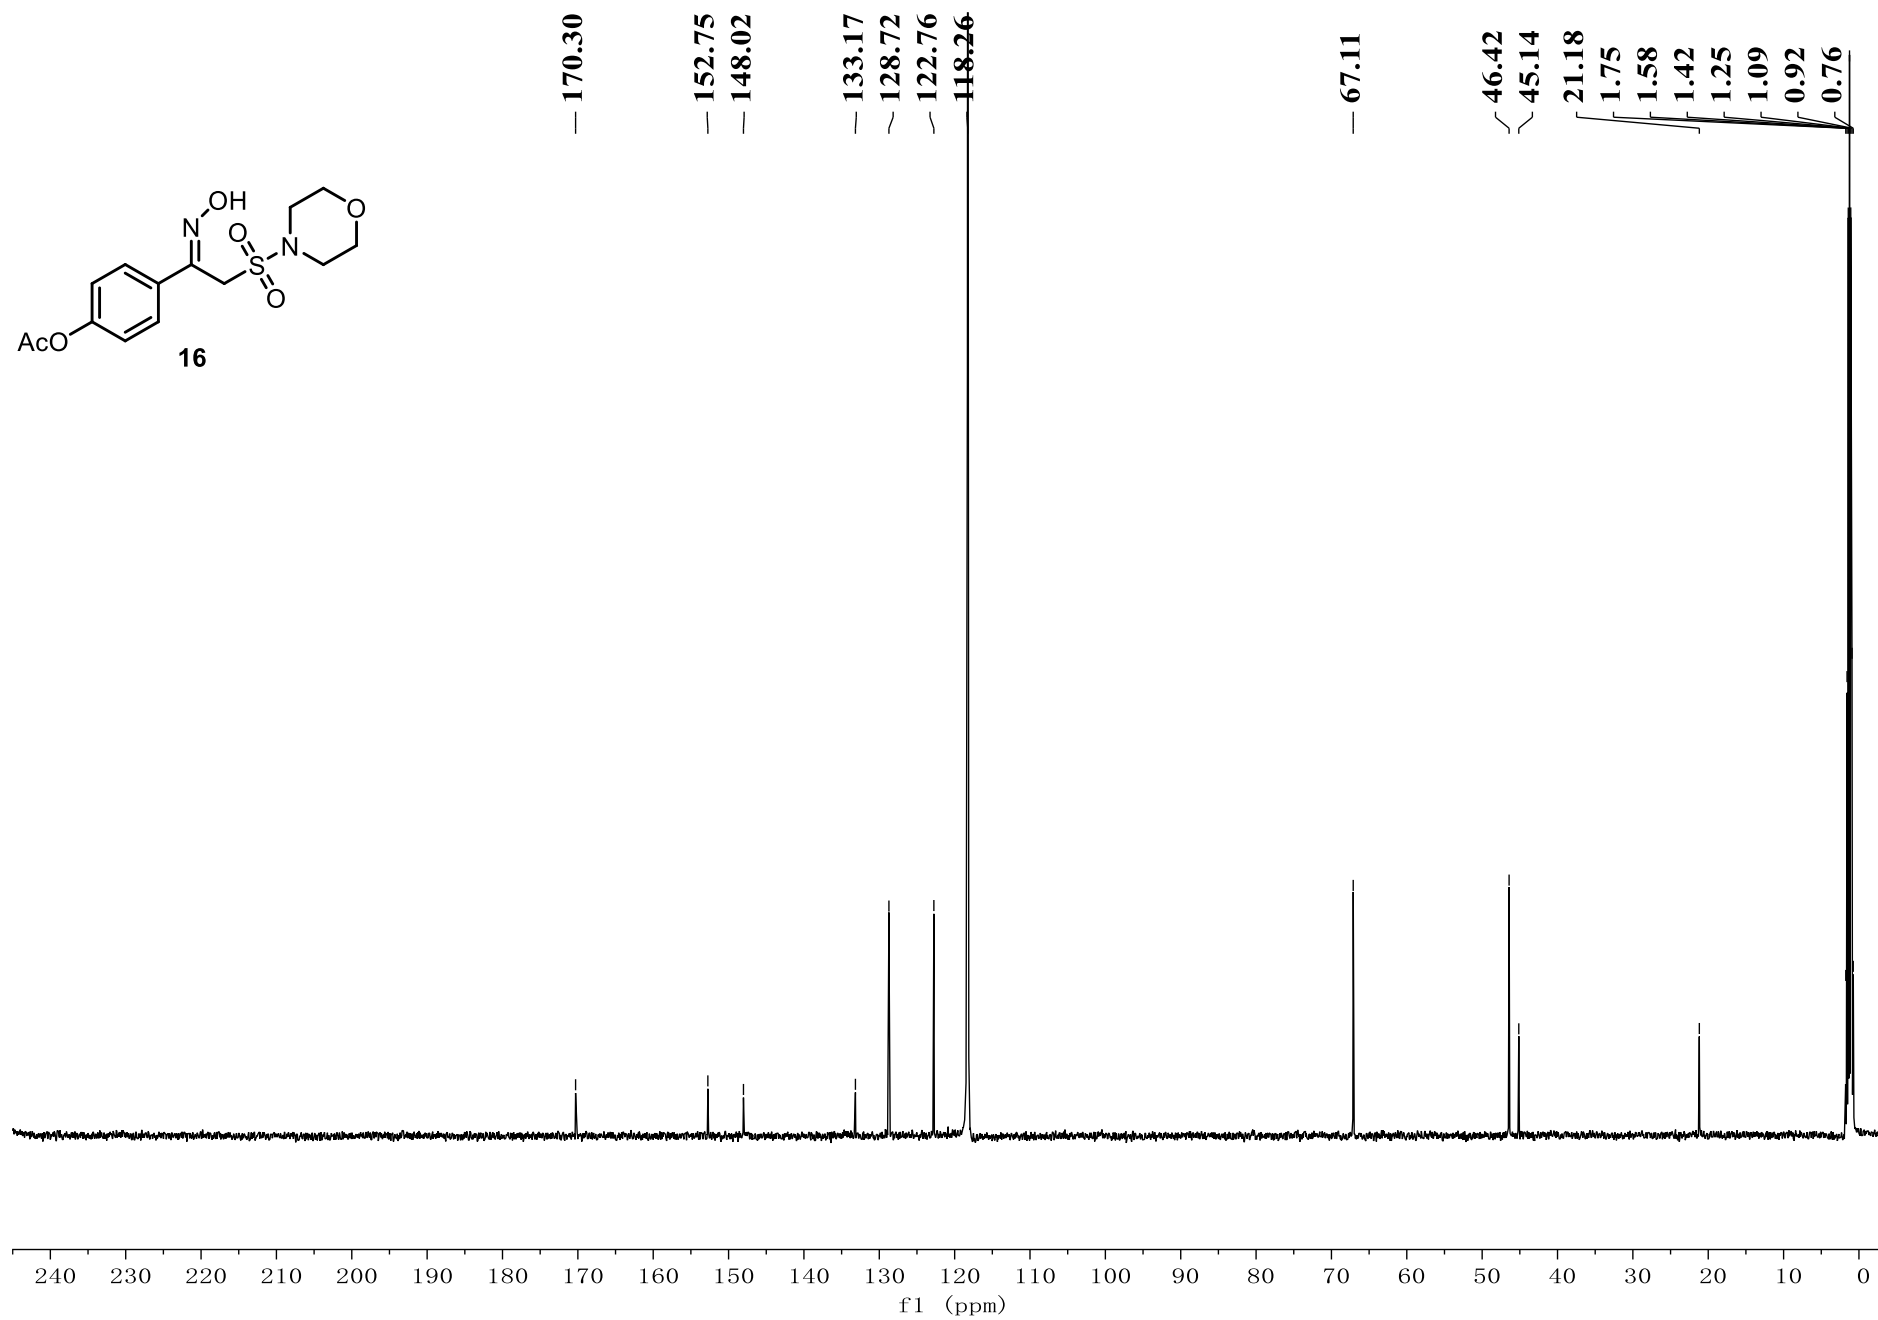

<sup>1</sup>H NMR (500 MHz, CD<sub>3</sub>CN) for 17

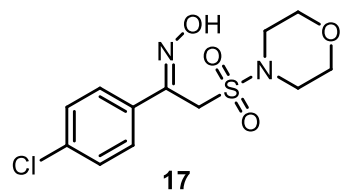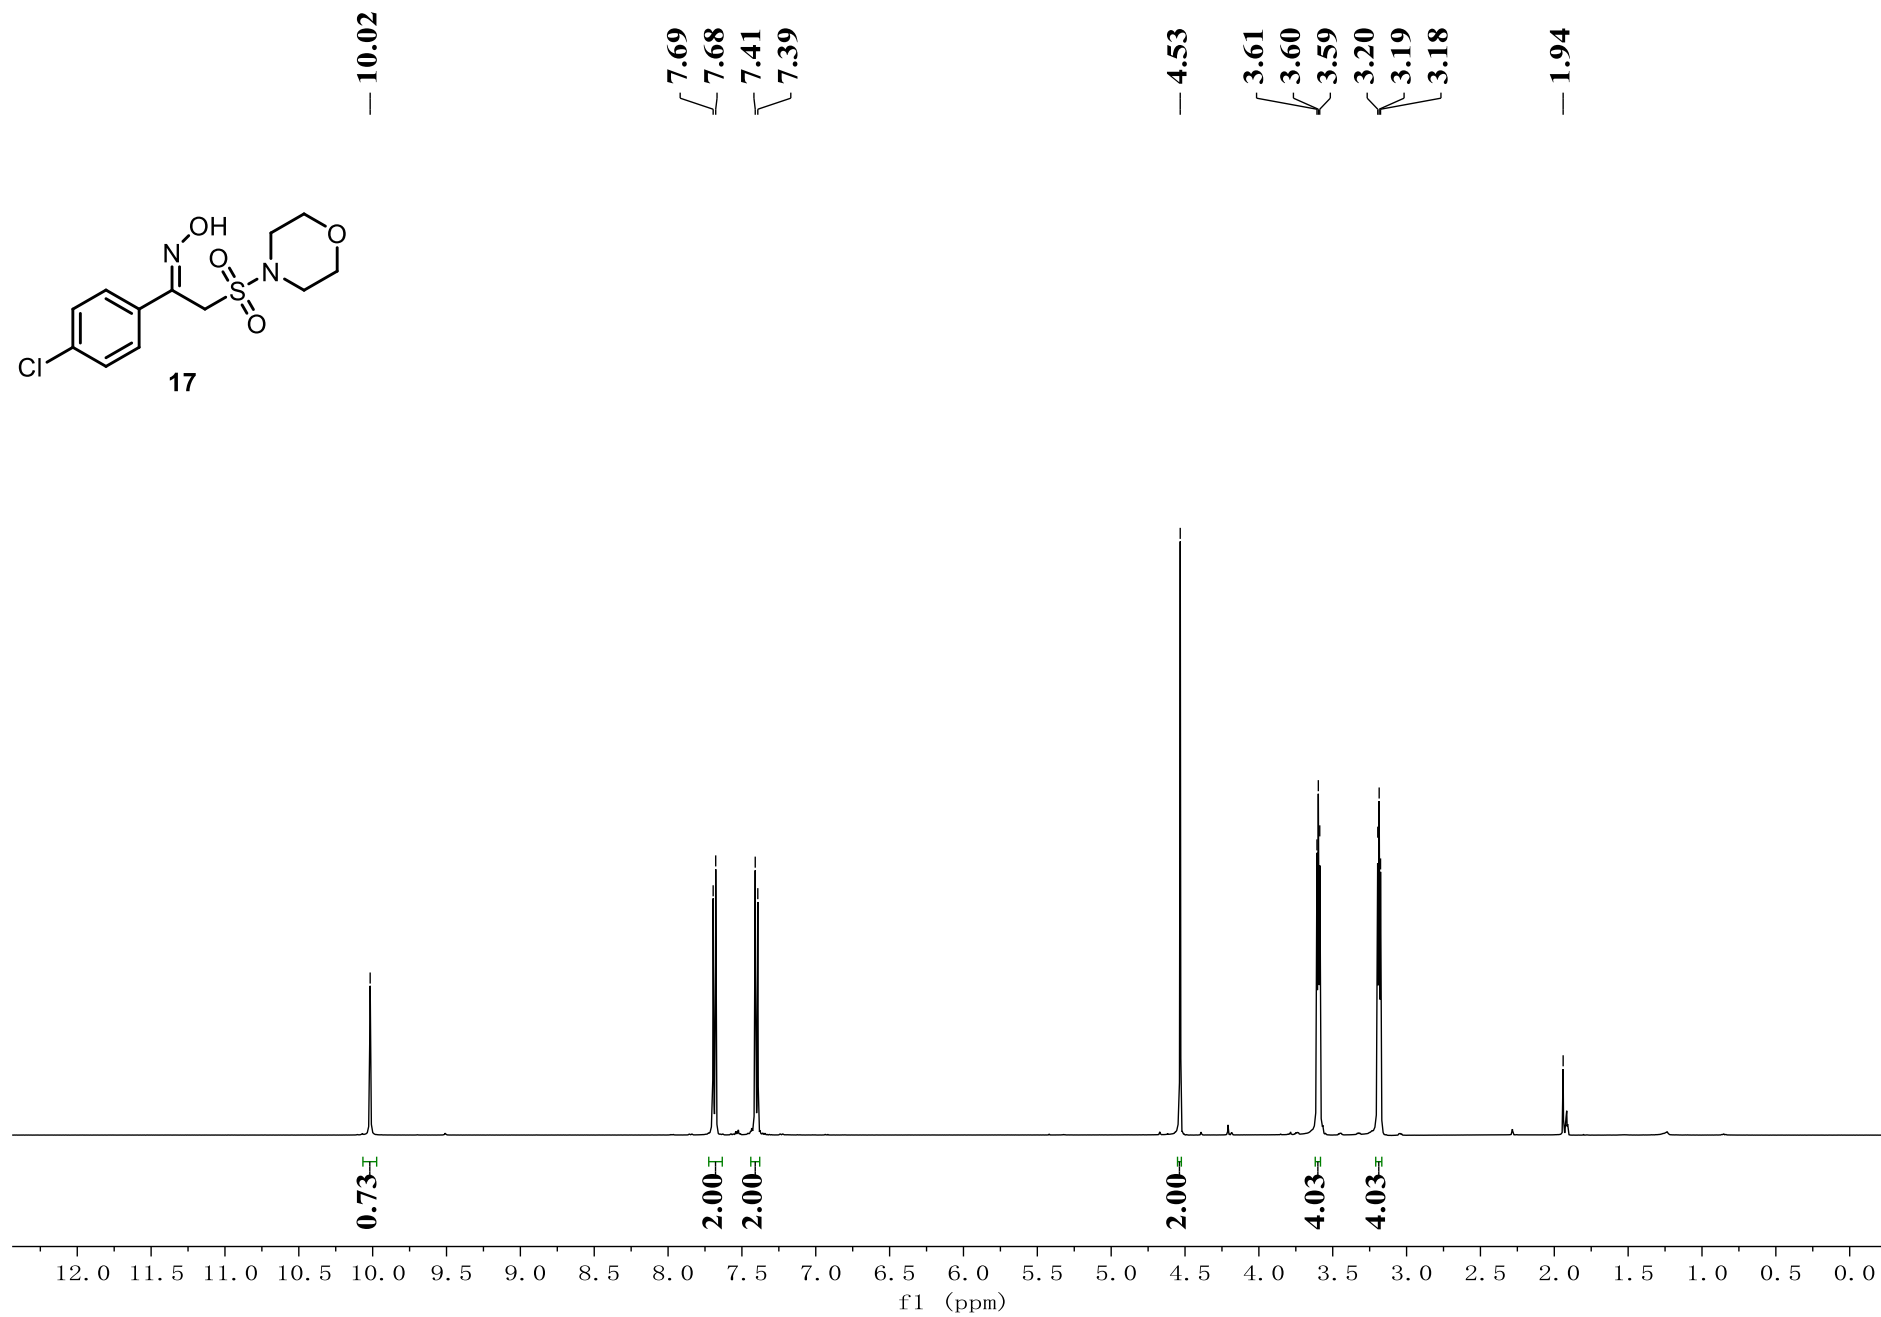

<sup>13</sup>C NMR (125 MHz, CD<sub>3</sub>CN) for 17

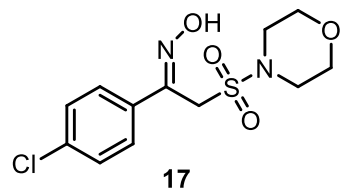

— 147.84  
└ 135.80  
└ 134.35  
└ 129.36  
└ 129.13  
— 118.26  
  
— 67.10  
  
└ 46.43  
└ 45.05  
  
└ 1.76  
└ 1.59  
└ 1.42  
└ 1.26  
└ 1.09  
└ 0.93  
└ 0.76

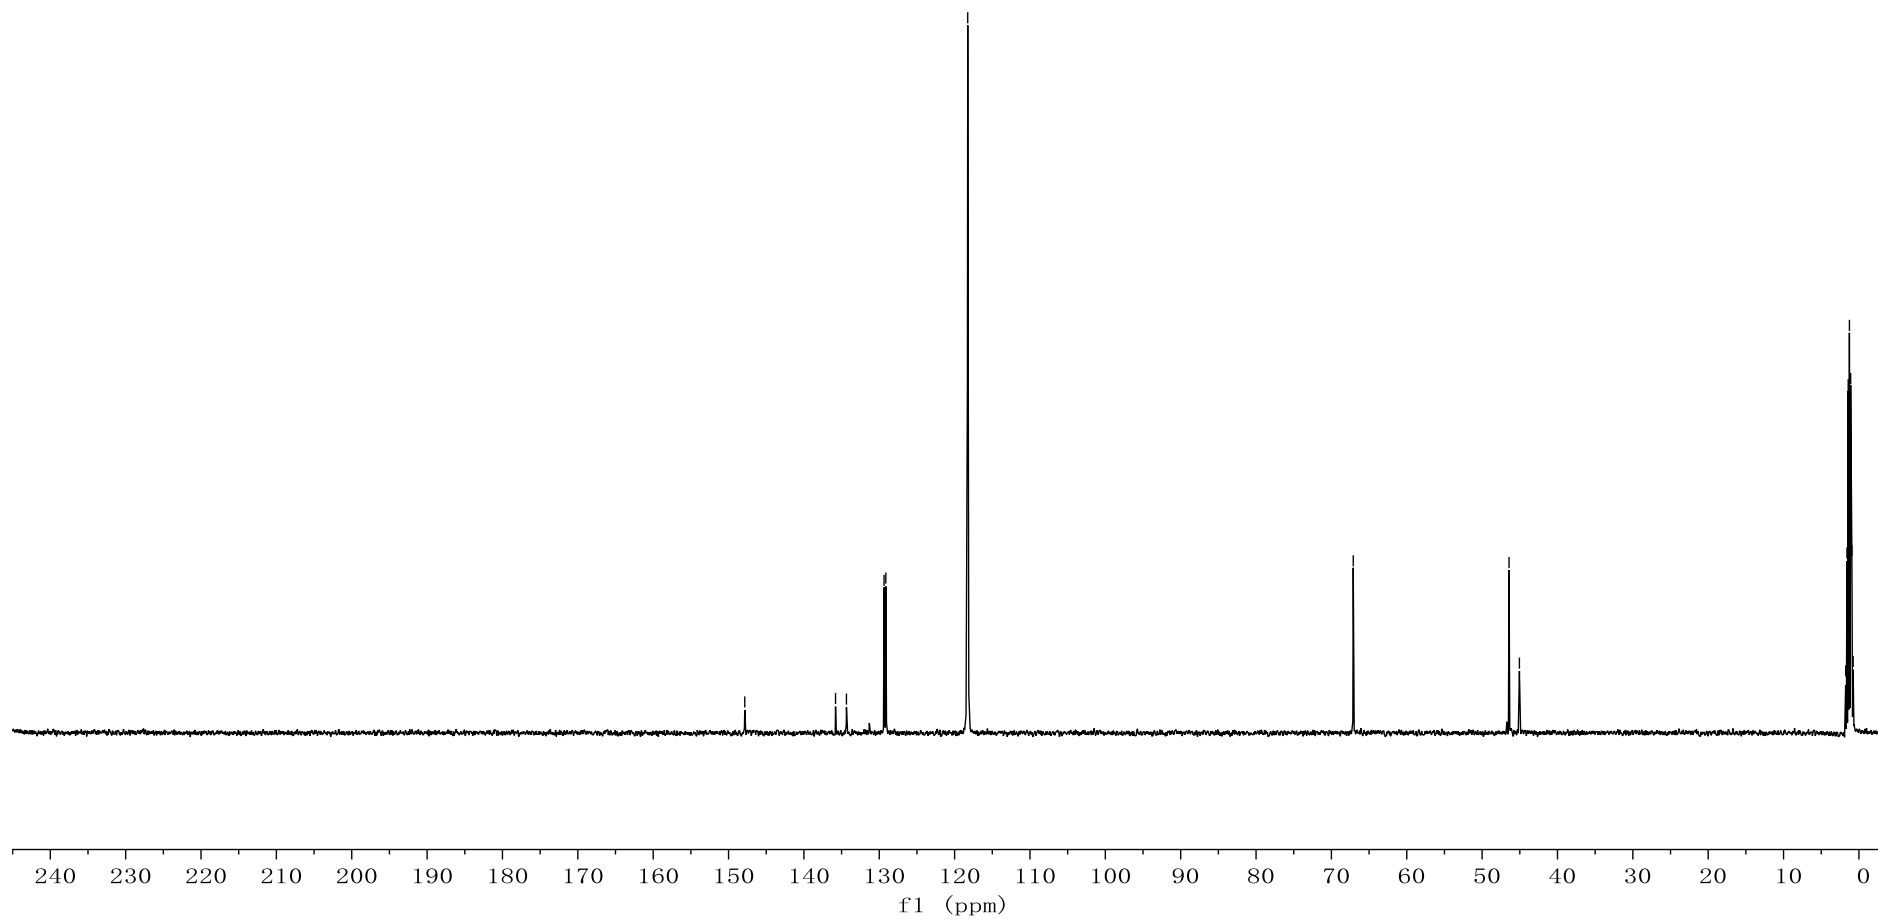

<sup>1</sup>H NMR (125 MHz, DMSO-d<sub>6</sub>) for 18

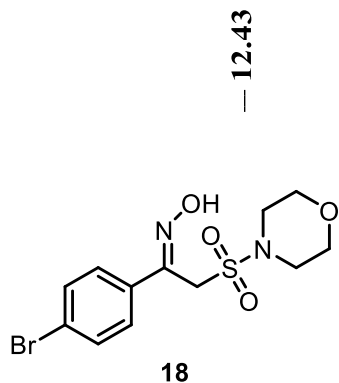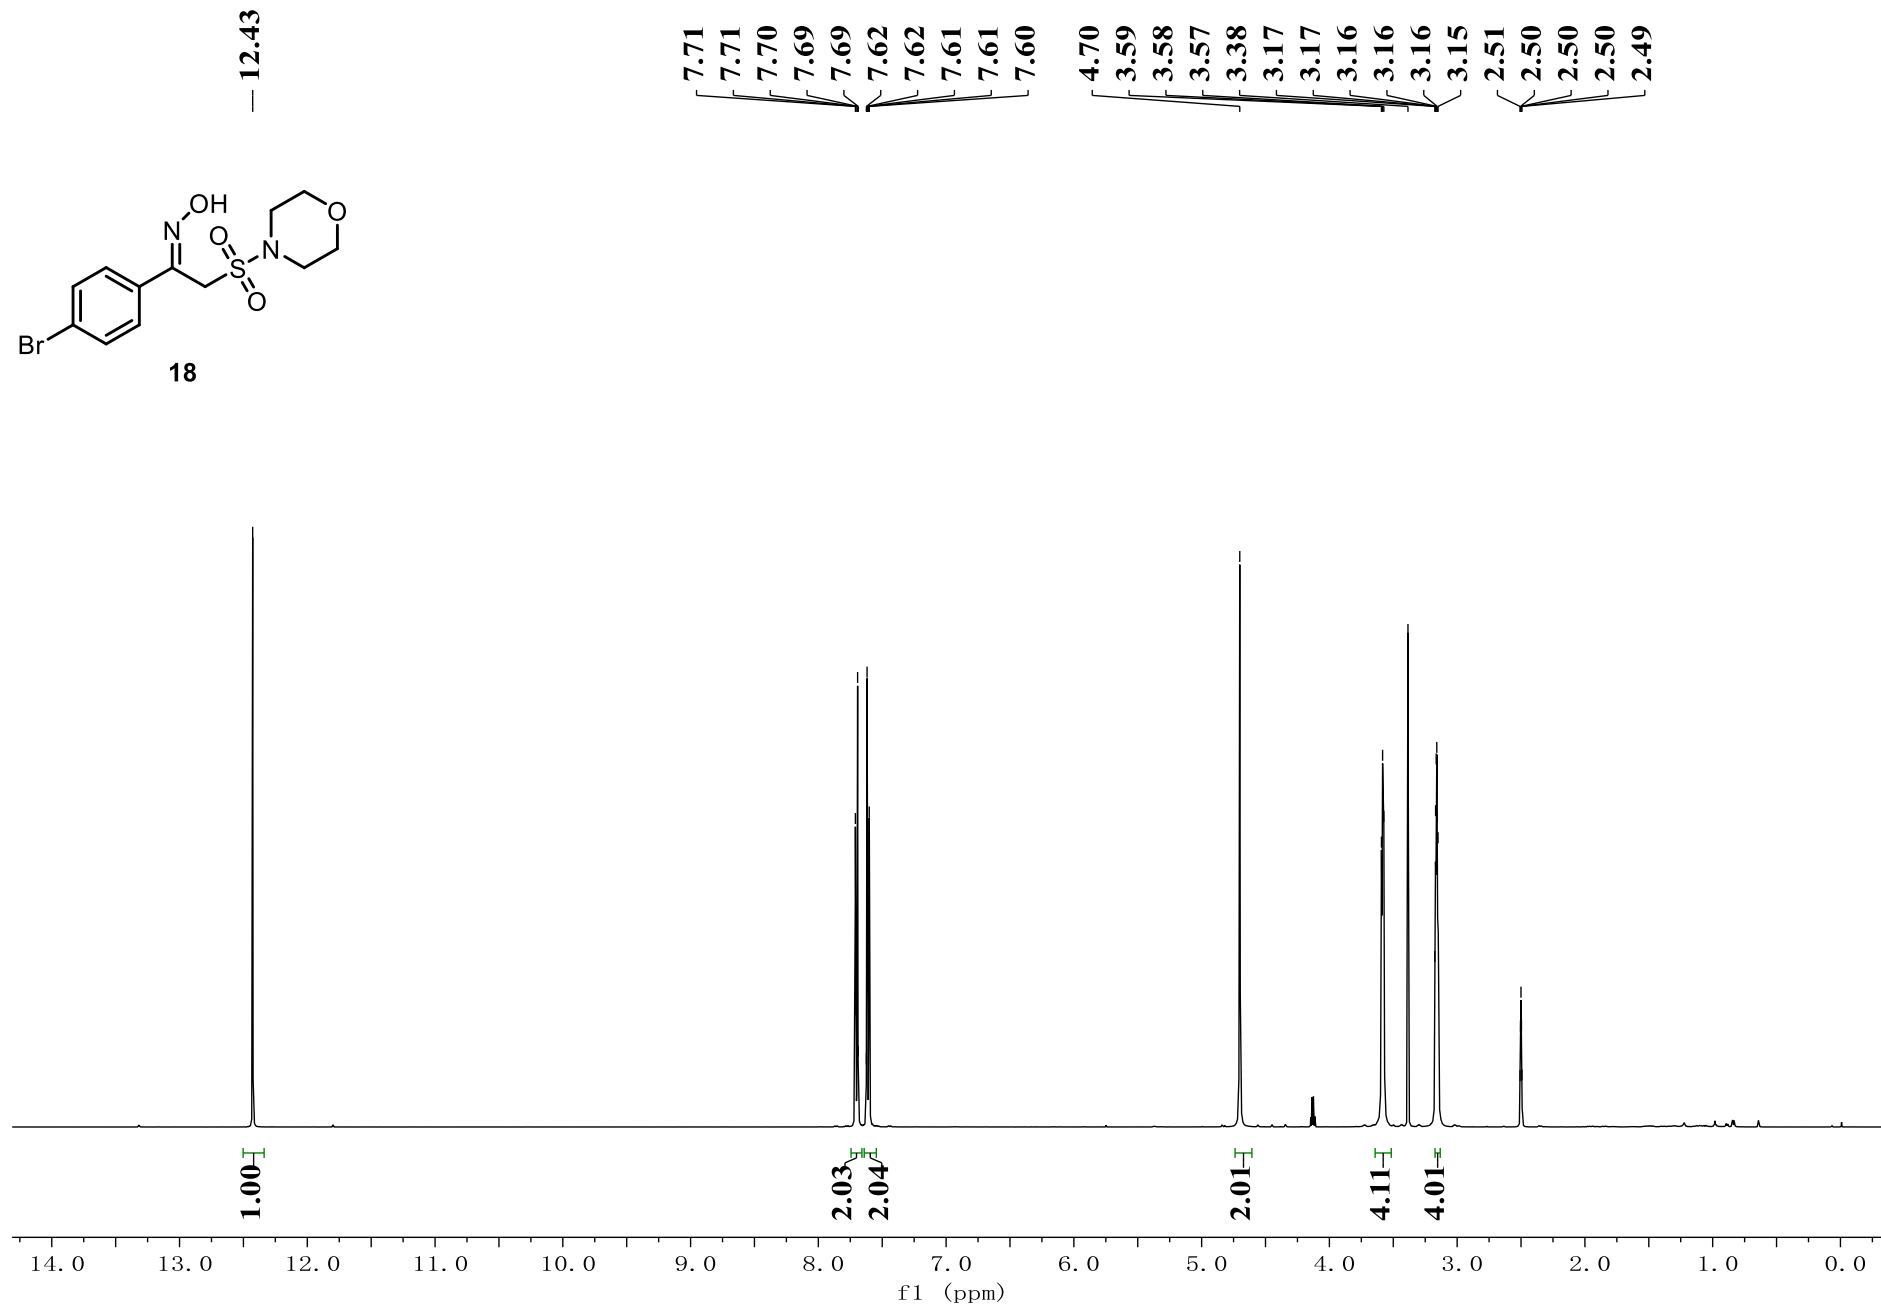

<sup>13</sup>C NMR (125 MHz, DMSO-*d*<sub>6</sub>) for 18

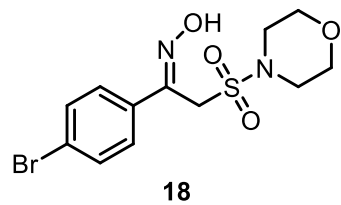

— 145.86

~ 134.08

~ 131.29

~ 128.51

~ 122.62

— 65.88

45.25

43.79

40.02

39.86

39.78

39.69

39.52

39.36

39.19

39.02

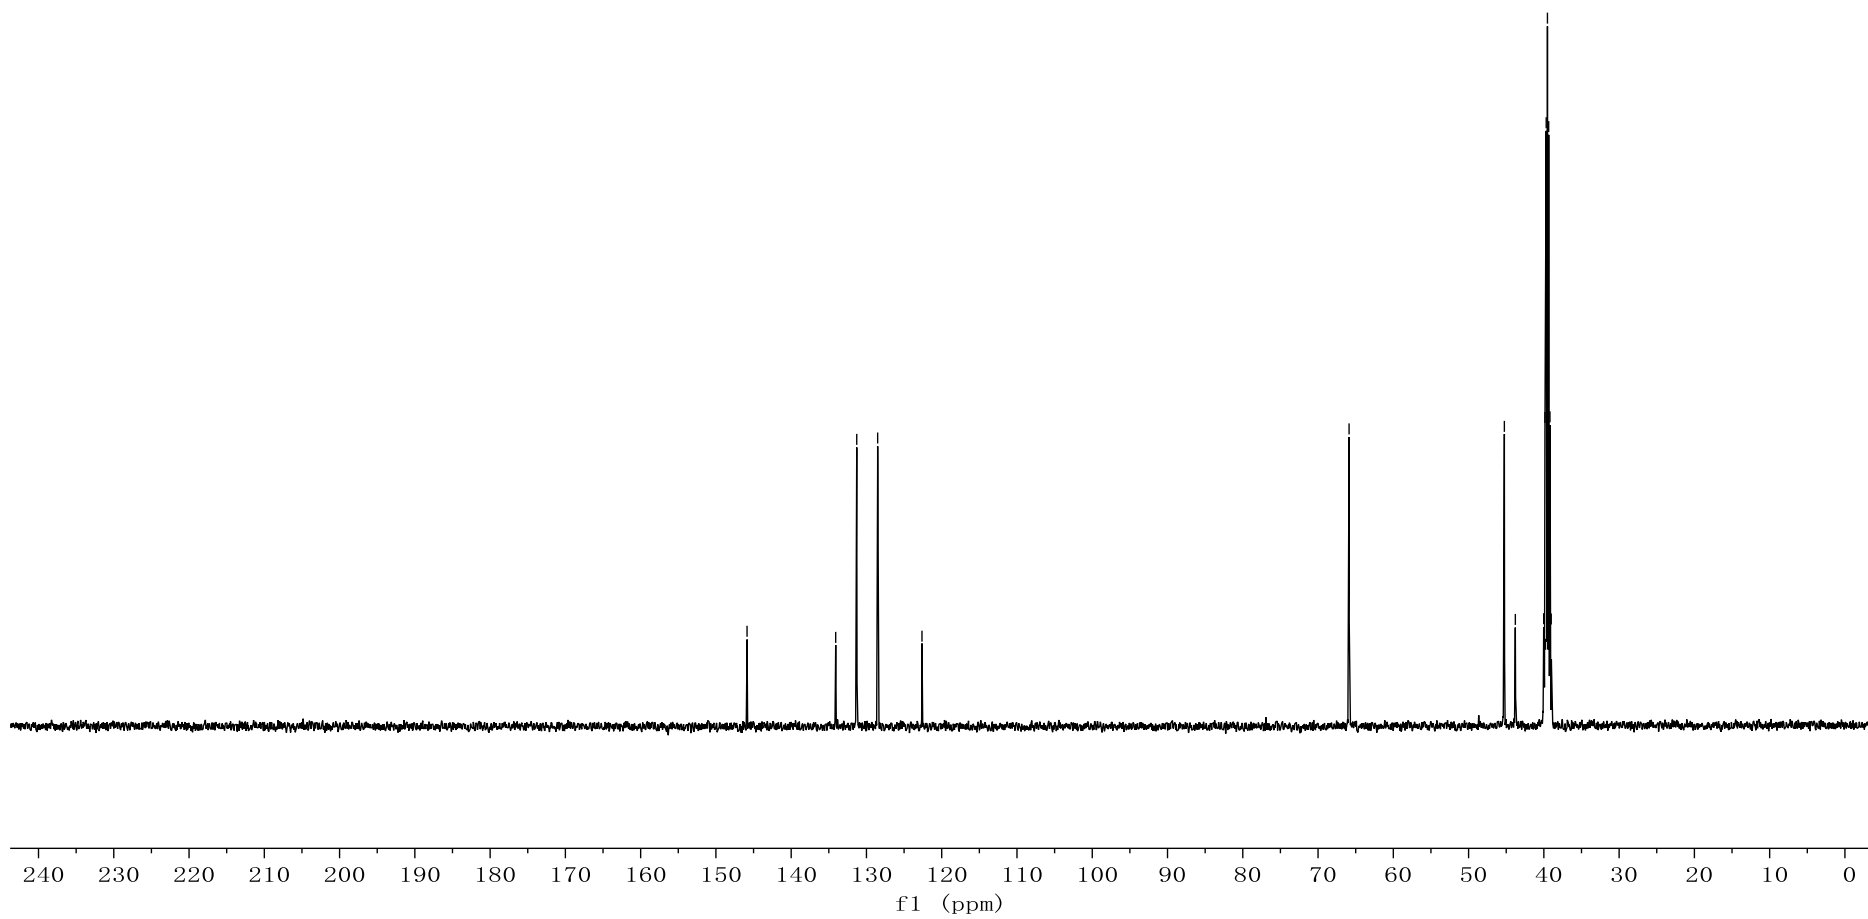

<sup>1</sup>H NMR (500 MHz, CD<sub>3</sub>OD) for 19

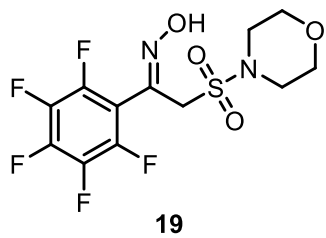

4.90  
4.51  
4.31  
3.71  
3.70  
3.69  
3.35  
3.34  
3.33  
3.33  
3.32  
3.32  
3.32  
3.31

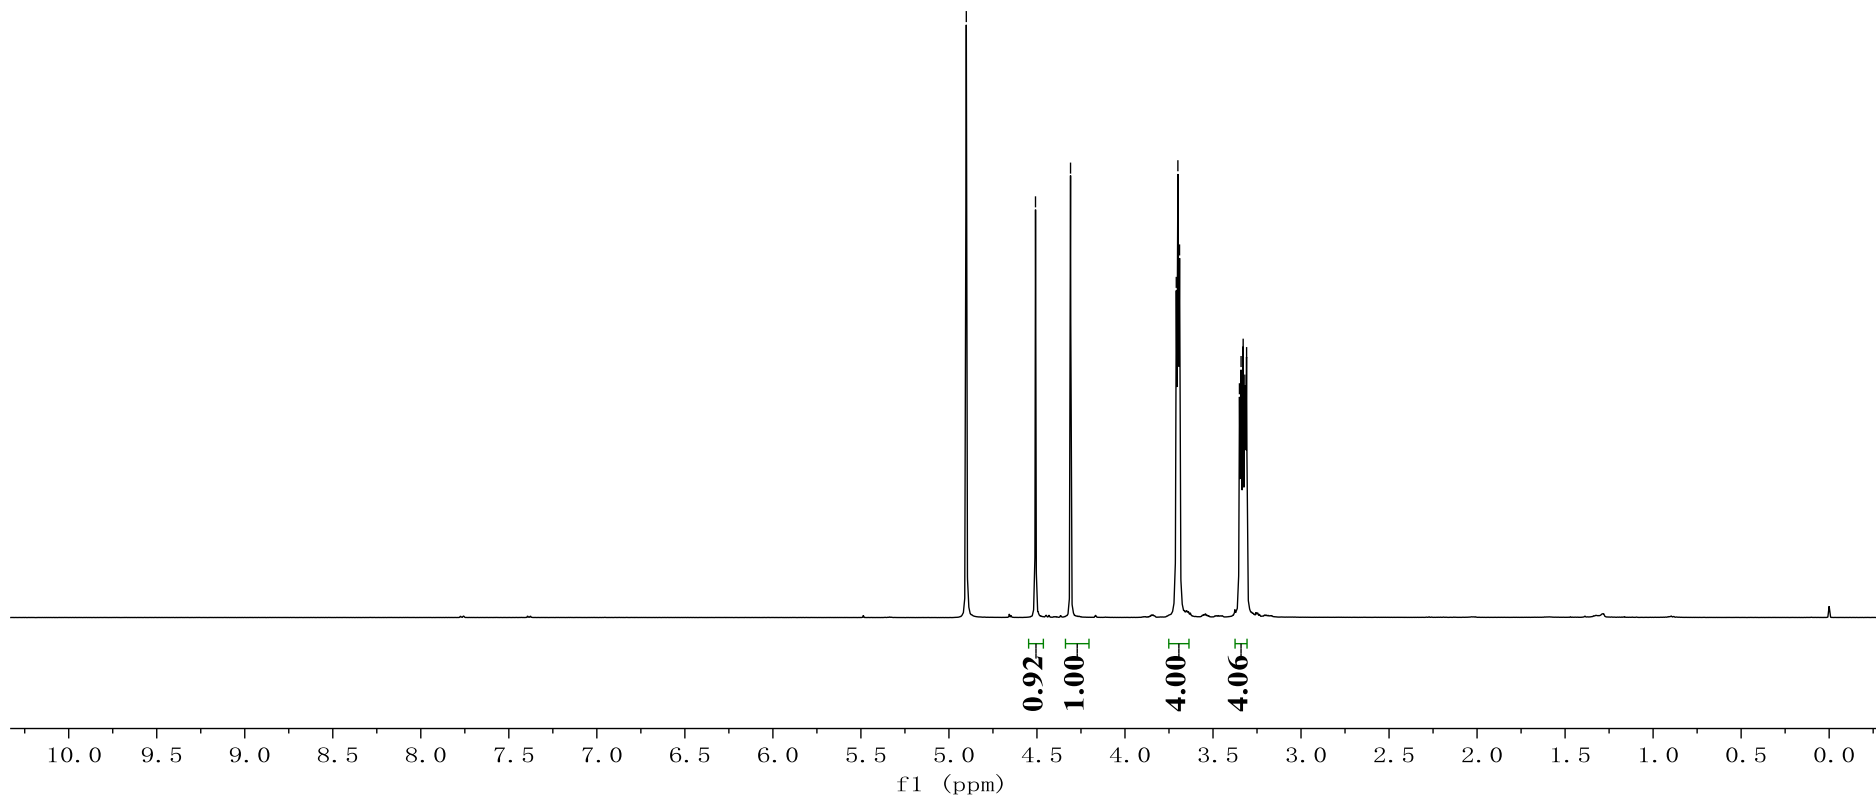

<sup>13</sup>C NMR (125 MHz, CD<sub>3</sub>OD) for 19

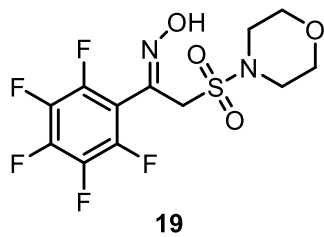

- 147.51
- 145.84
- 145.44
- 143.99
- 143.80
- 142.14
- 139.97
- 139.82
- 138.60
- 137.97
- 137.85
- 136.98
- 112.53
- 109.30

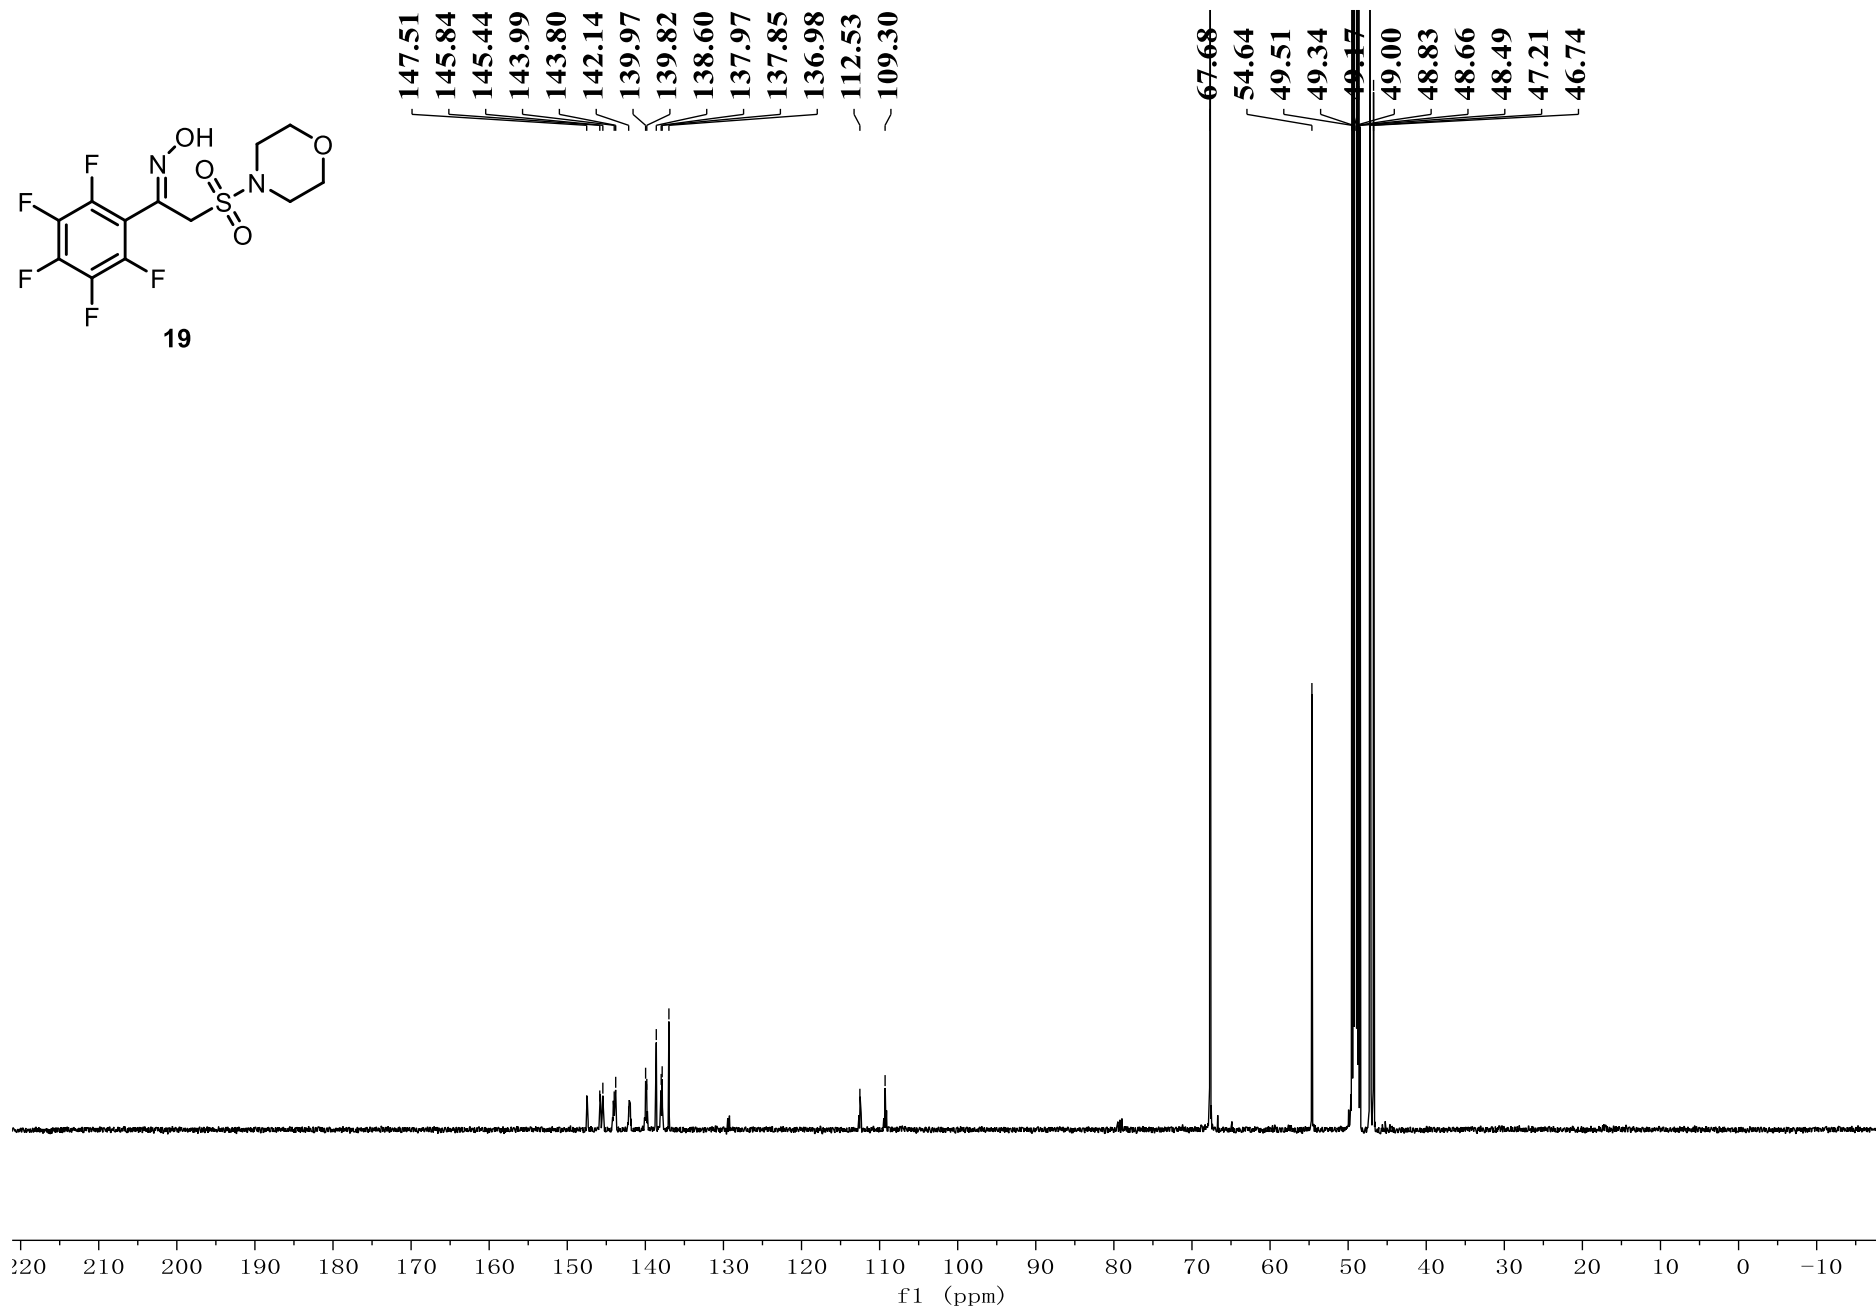



<sup>19</sup>F NMR (470 MHz, CD<sub>3</sub>OD) for 19

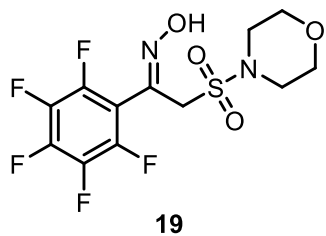

-138.67  
-138.68  
-138.71  
-138.75  
-138.75  
-143.27  
-143.29  
-143.32  
-143.34  
-143.34  
-155.59  
-155.63  
-155.68  
-155.84  
-155.88  
-155.93  
-164.84  
-164.87  
-164.88  
-165.03  
-165.06  
-165.08  
-165.12

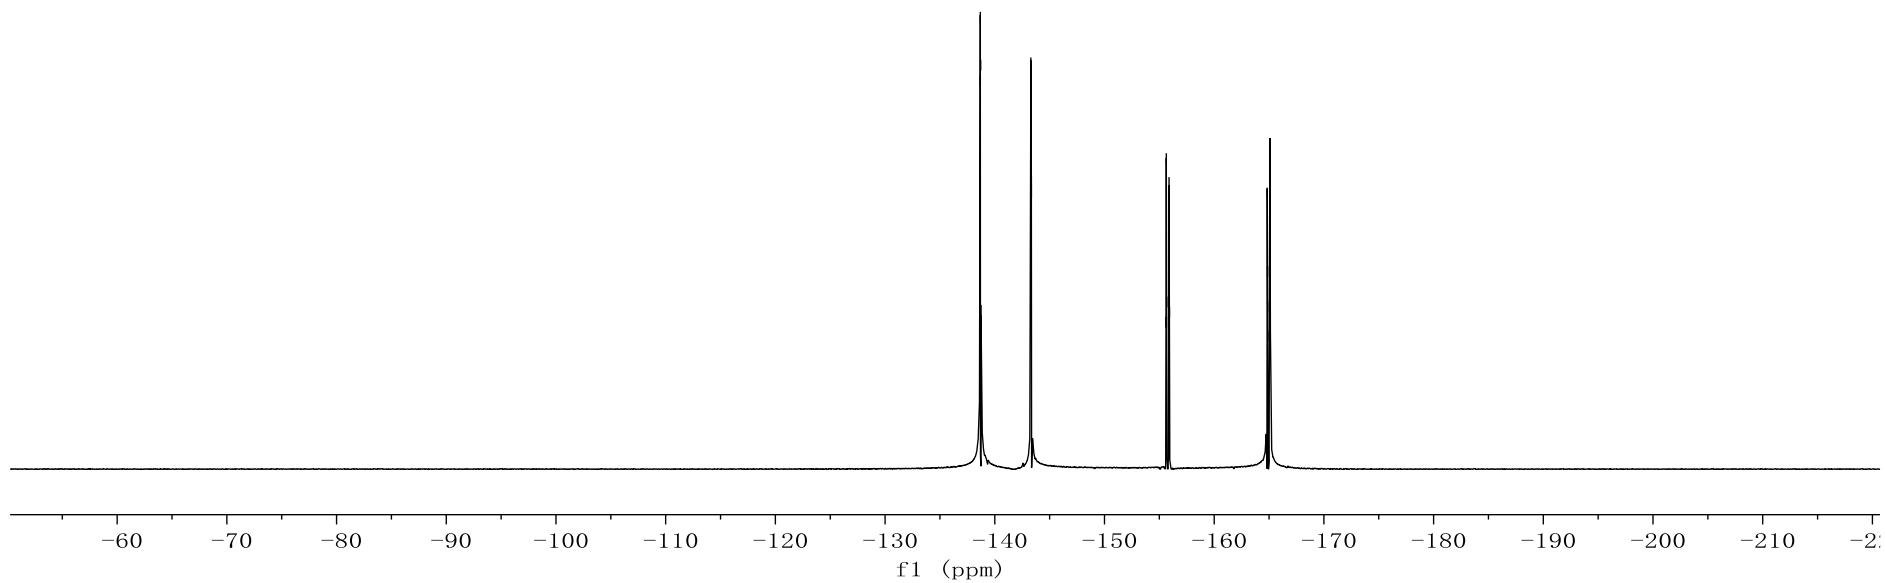

<sup>1</sup>H NMR (500 MHz, CD<sub>3</sub>CN) for 20

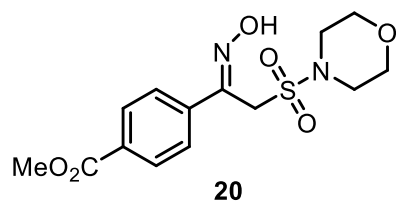

— 10.22

8.02  
8.01  
7.84  
7.82

— 4.60  
3.87  
3.63  
3.62  
3.61  
3.28  
3.22  
3.21  
3.20  
2.33  
1.95  
1.94  
1.94  
1.93  
1.93

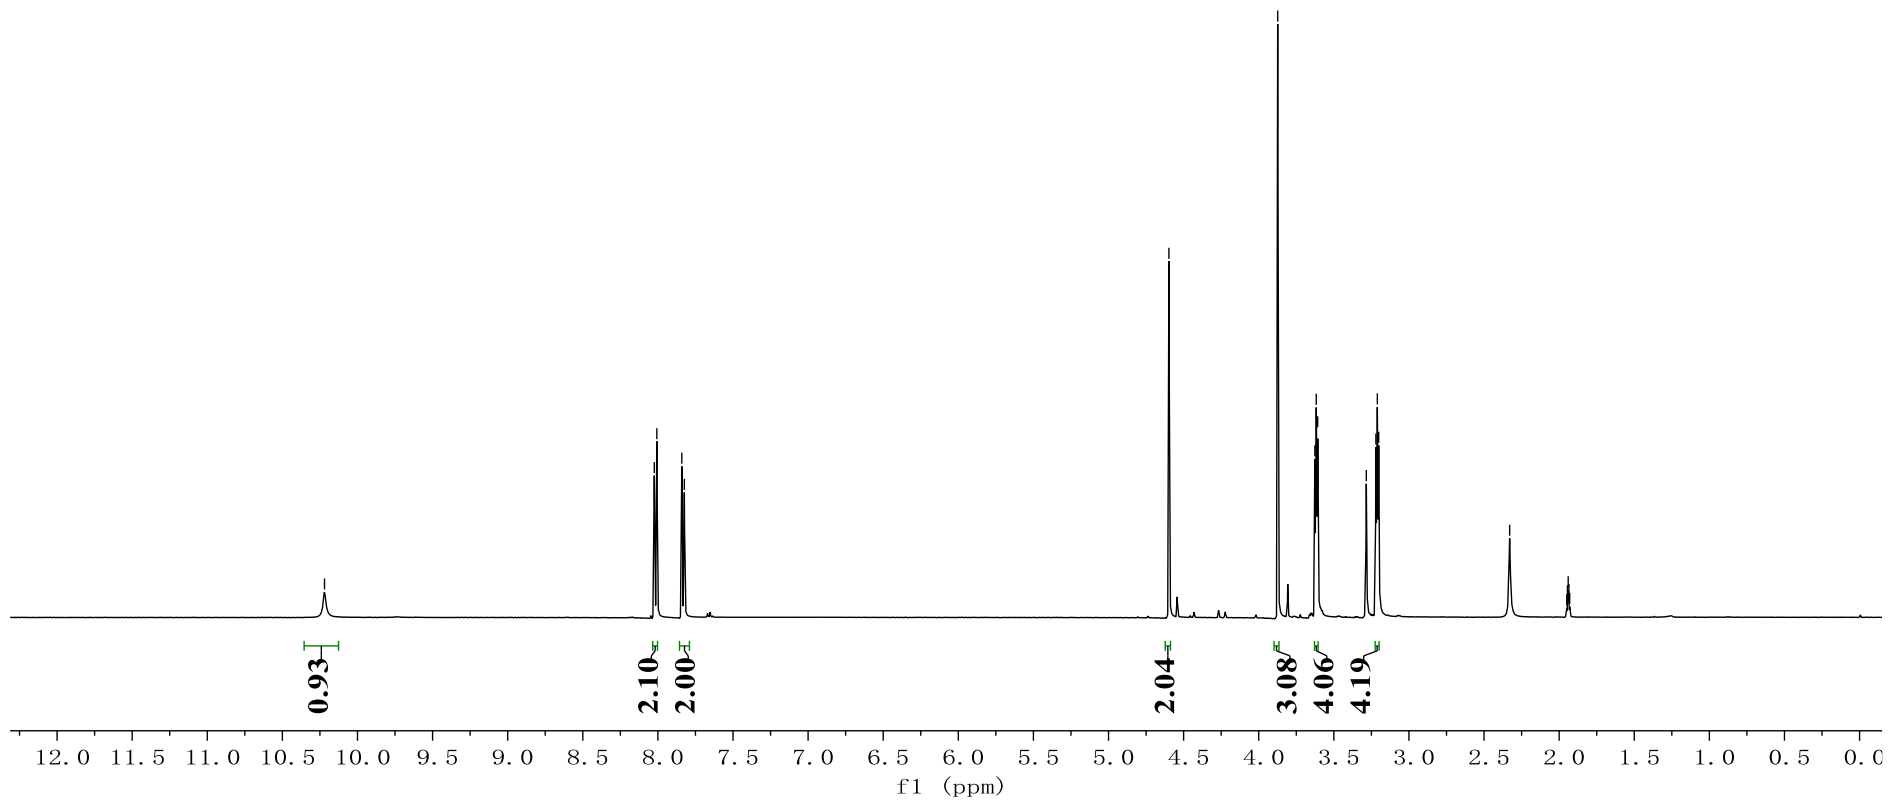

<sup>13</sup>C NMR (125 MHz, CD<sub>3</sub>CN) for 20

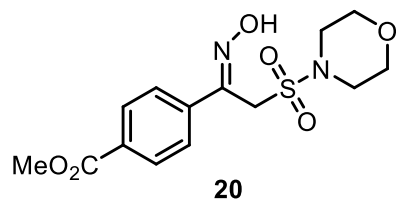

— 167.13

~ 148.15

~ 139.80

~ 131.78

~ 130.17

~ 127.65

~ 118.26

— 67.09

~ 52.76

~ 46.42

~ 45.09

1.75

1.58

1.42

1.25

1.09

0.92

0.76

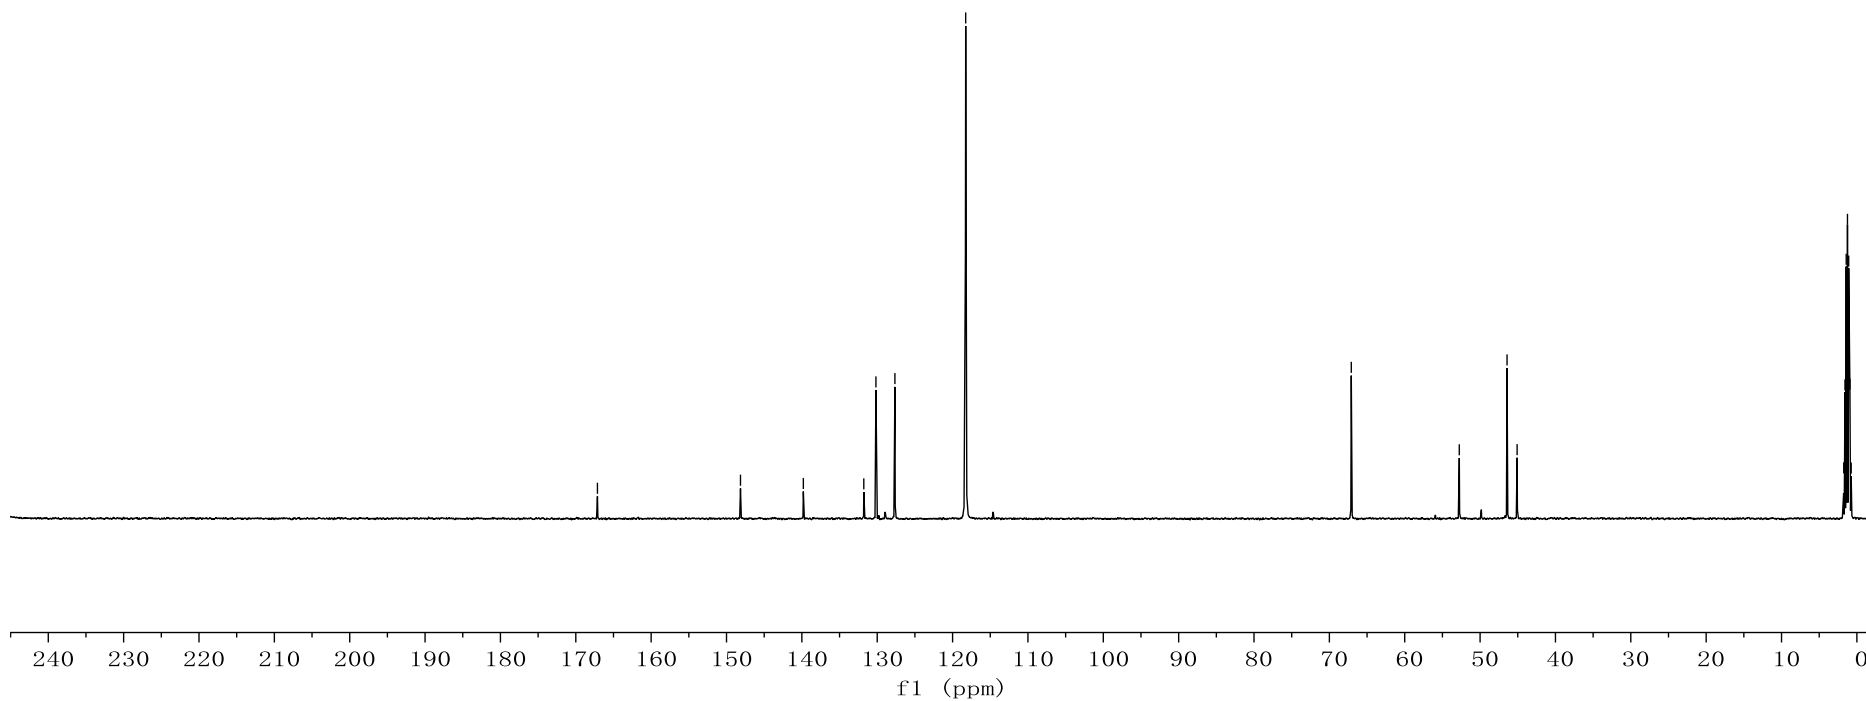

<sup>1</sup>H NMR (500 MHz, CDCl<sub>3</sub>) for 21

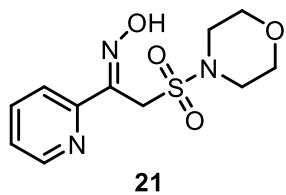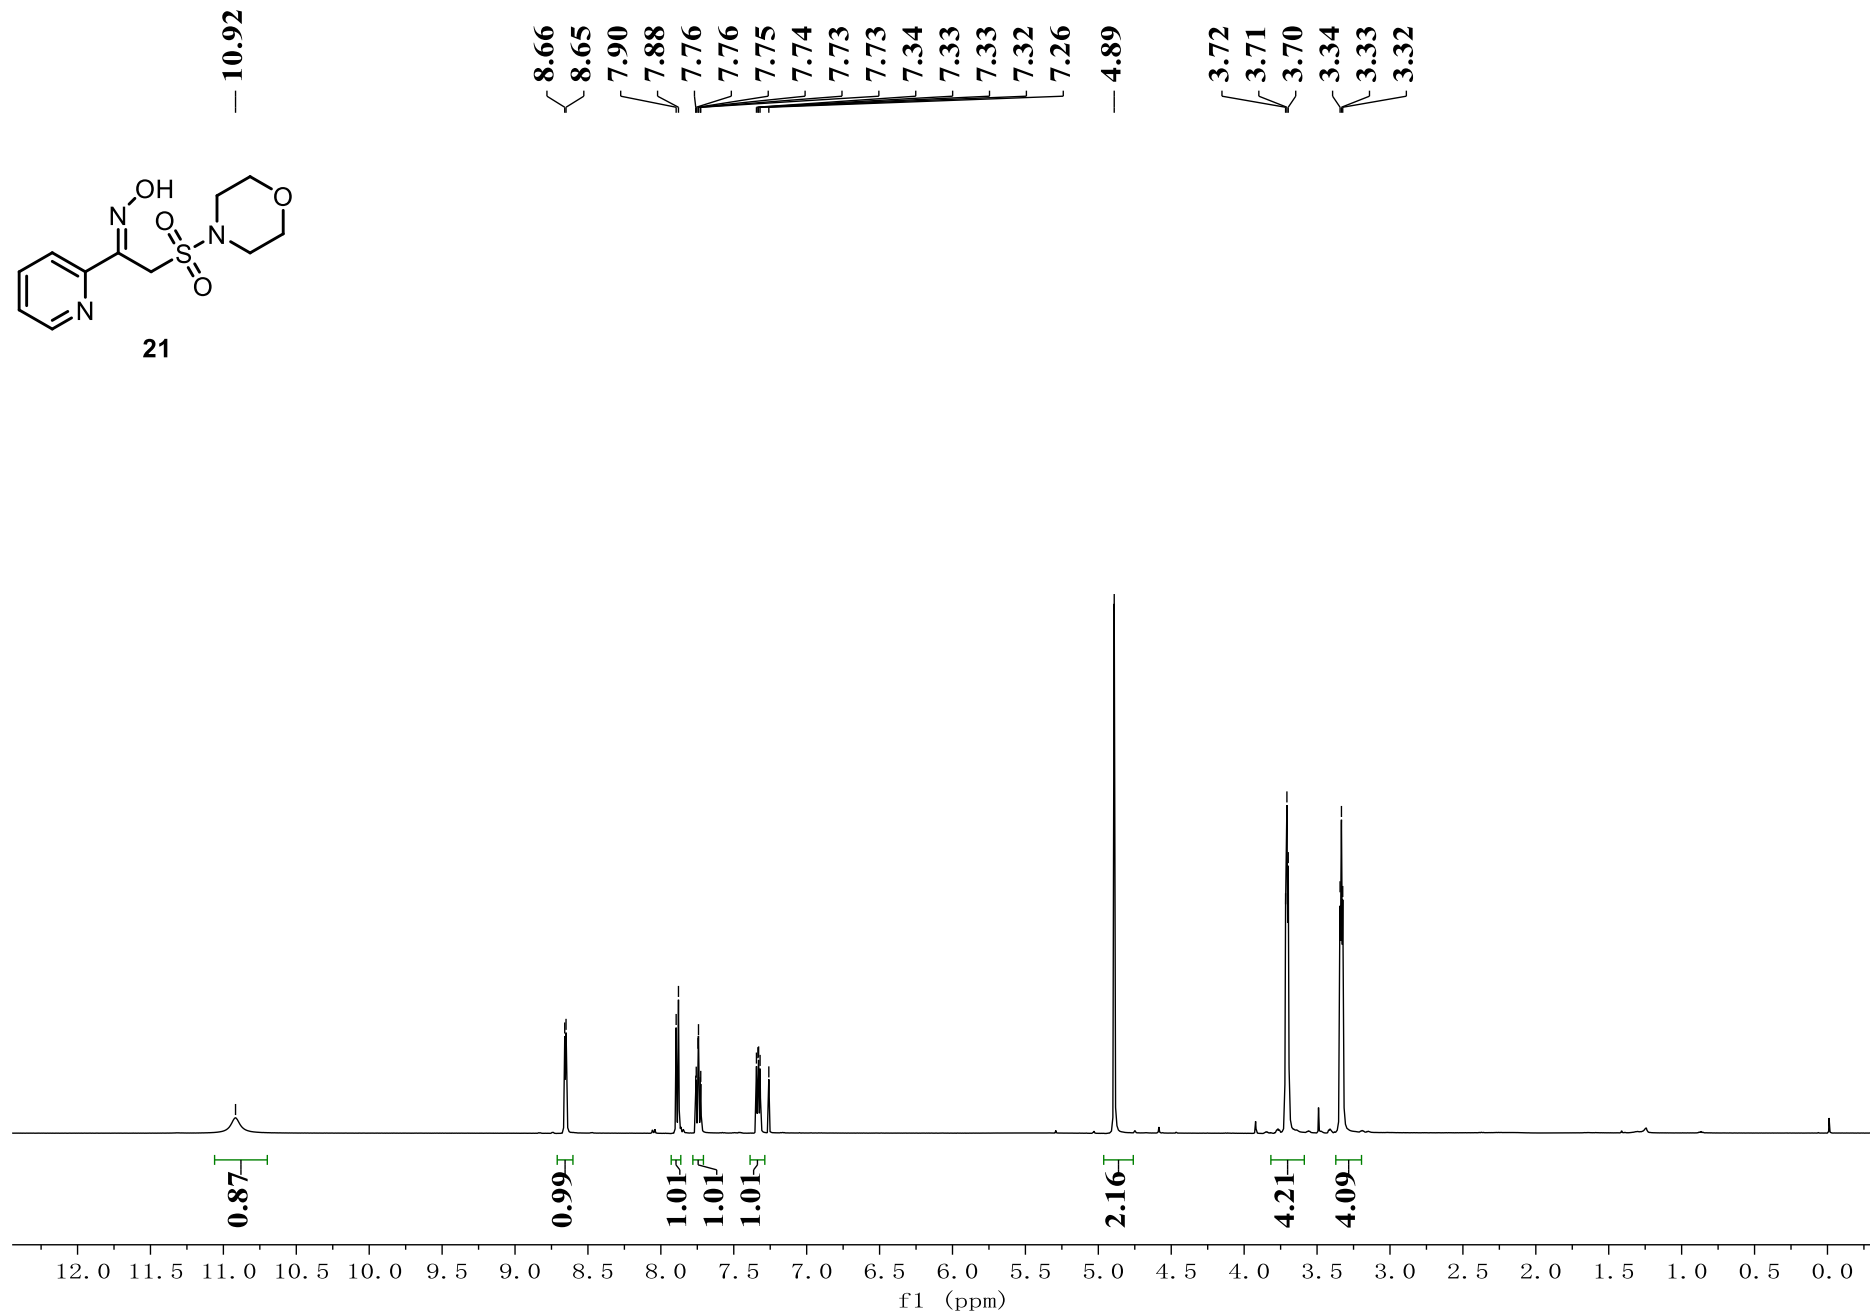

<sup>13</sup>C NMR (125 MHz, CDCl<sub>3</sub>) for 21

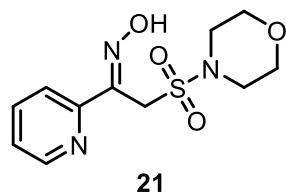

152.05  
149.02  
148.63  
— 137.13  
~ 124.49  
~ 121.48  
  
77.41  
77.16  
76.91  
— 66.89  
  
45.47  
43.92

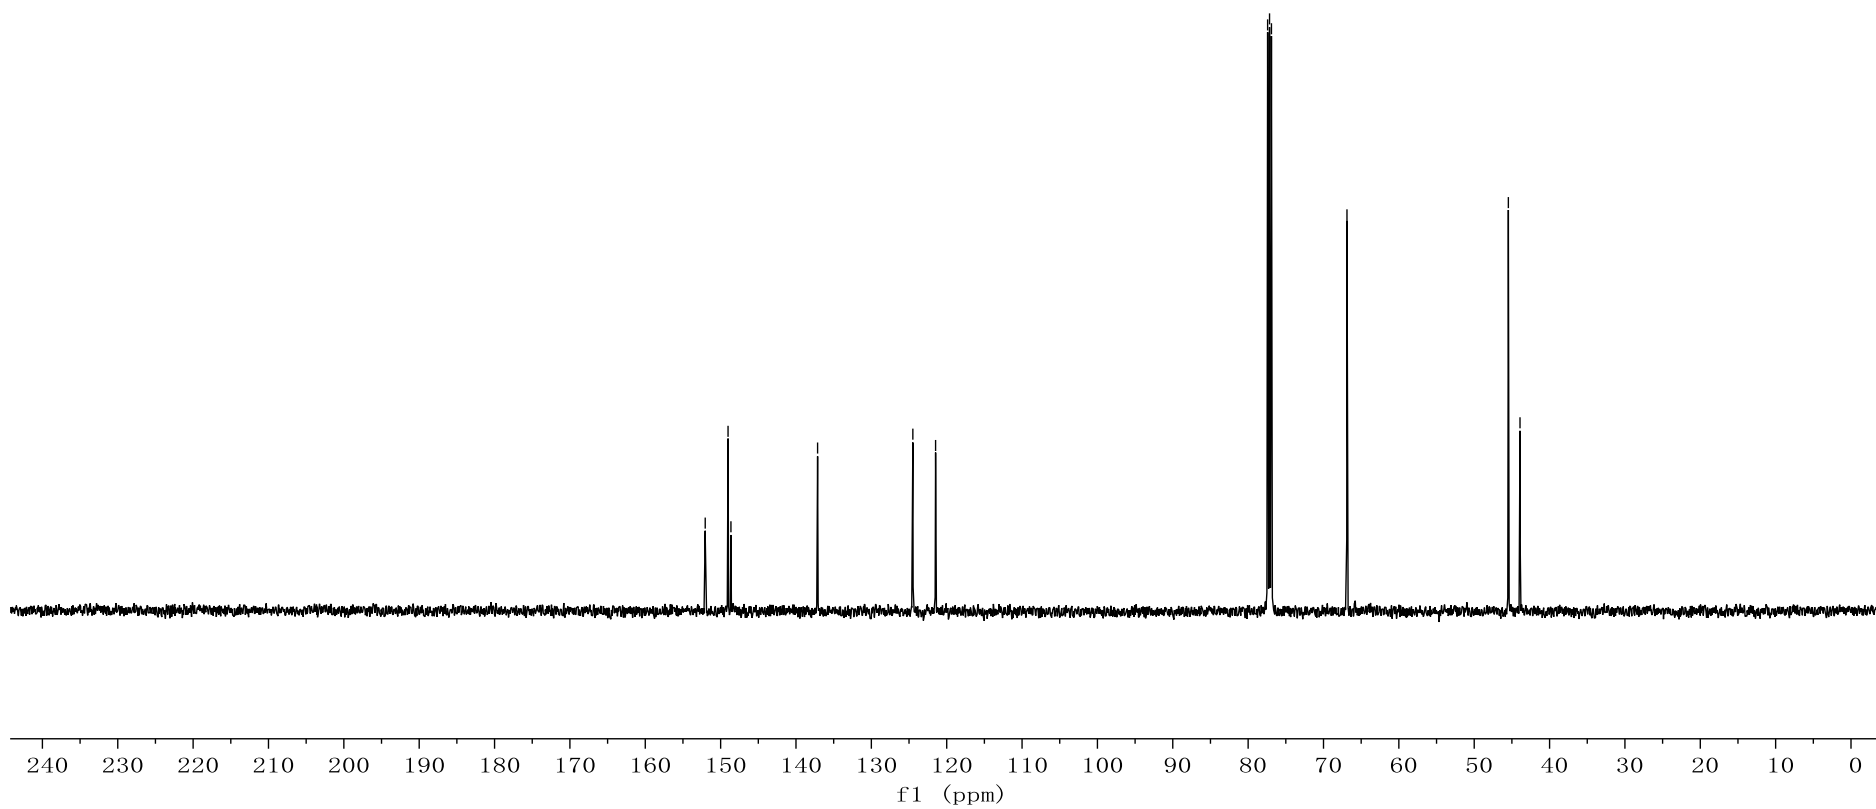

<sup>1</sup>H NMR (500 MHz, DMSO-d<sub>6</sub>) for 22

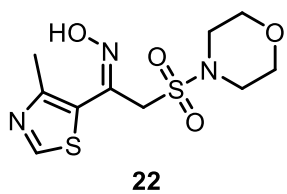

— 12.26

— 9.09

— 4.39  
— 3.57  
— 3.57  
— 3.56  
— 3.36  
— 3.15  
— 3.15  
— 3.14  
— 2.51  
— 2.50  
— 2.50  
— 2.50  
— 2.49  
— 2.36

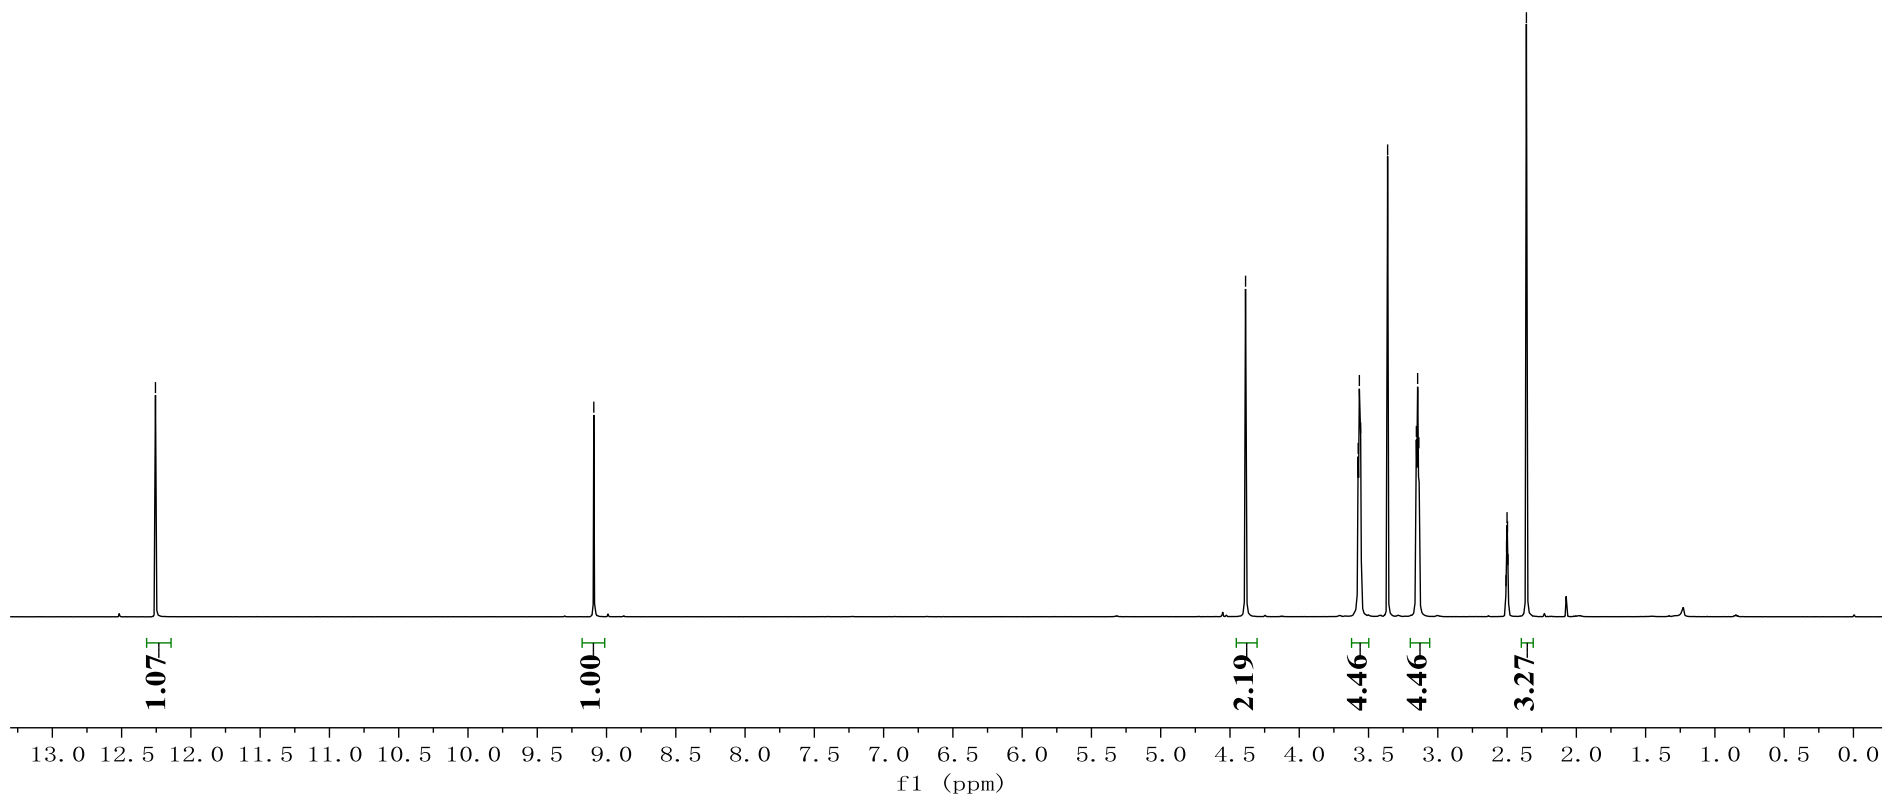

<sup>13</sup>C NMR (125 MHz, DMSO-*d*<sub>6</sub>) for 22

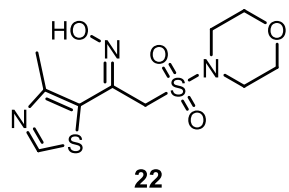

154.52  
154.46  
152.52  
— 139.82  
— 121.08  
— 65.81  
54.40  
45.44  
40.02  
39.85  
39.69  
39.52  
39.35  
39.19  
39.02  
— 17.24

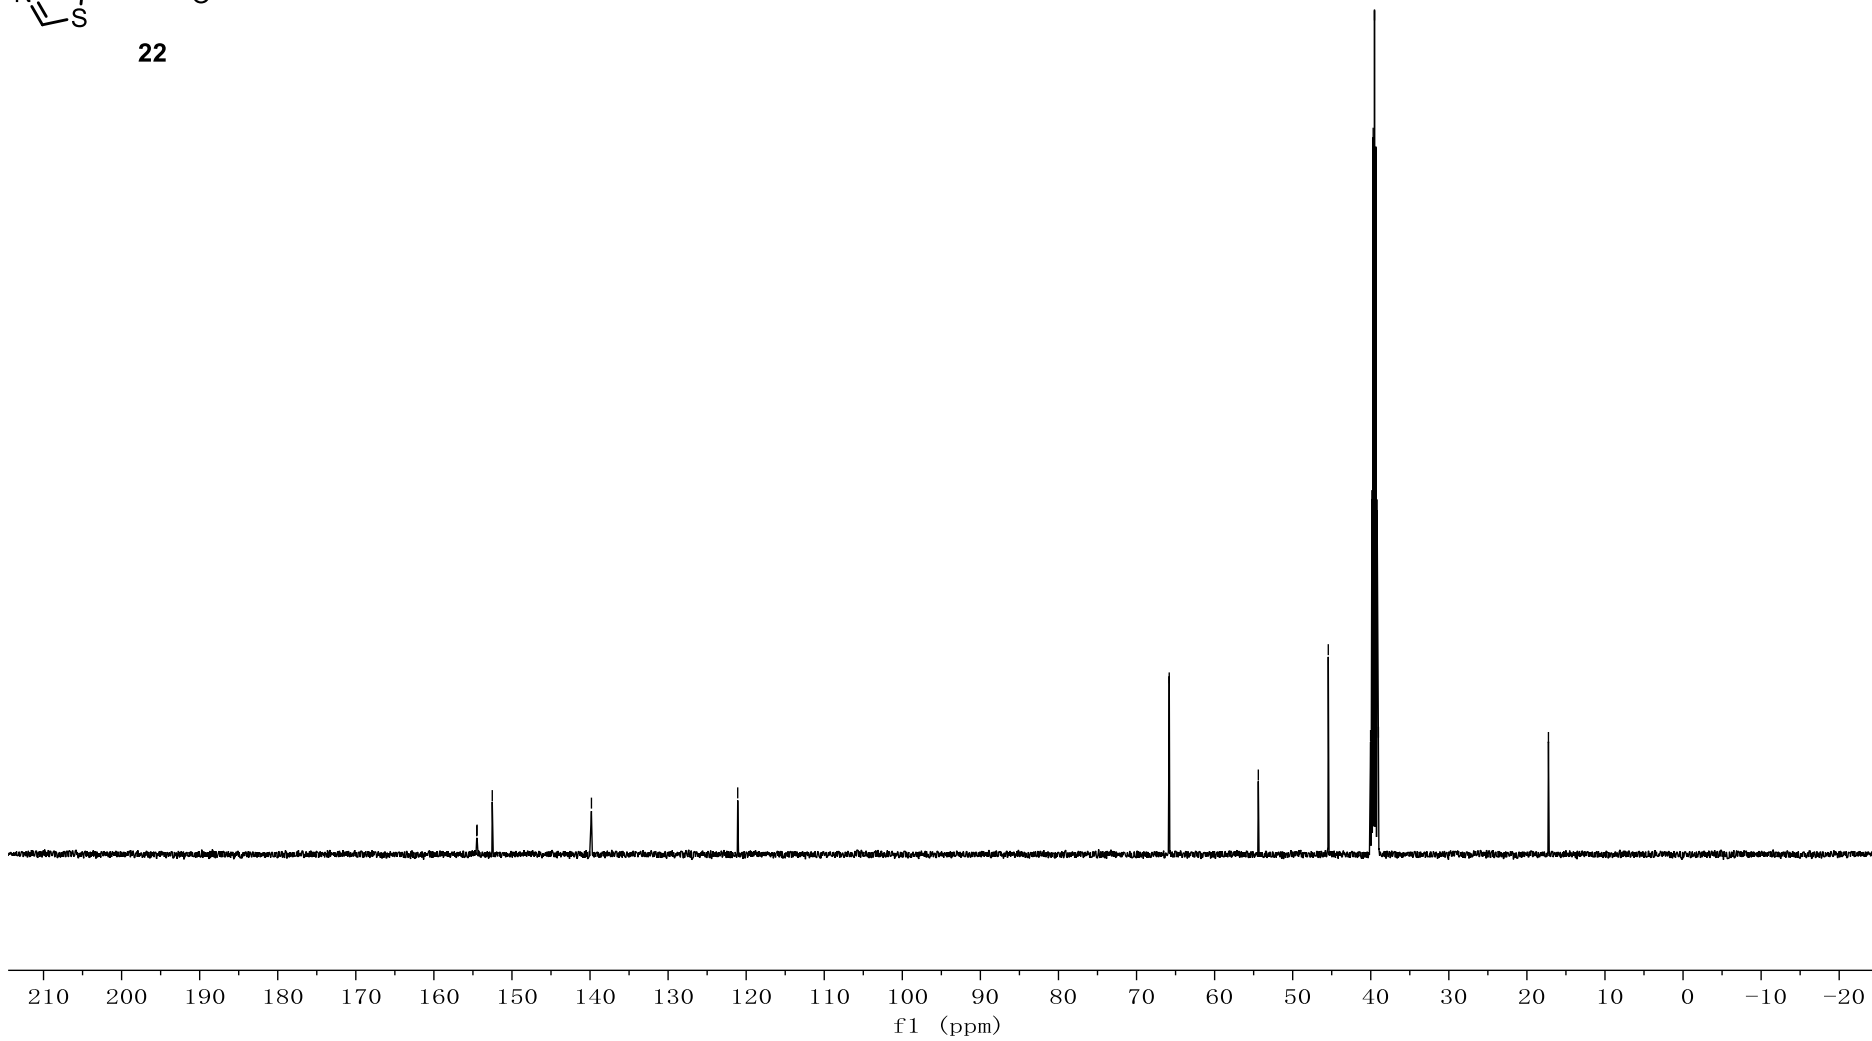

<sup>1</sup>H NMR (500 MHz, DMSO-d<sub>6</sub>) for 23

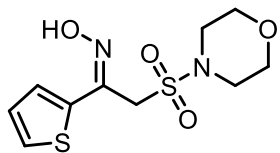

23

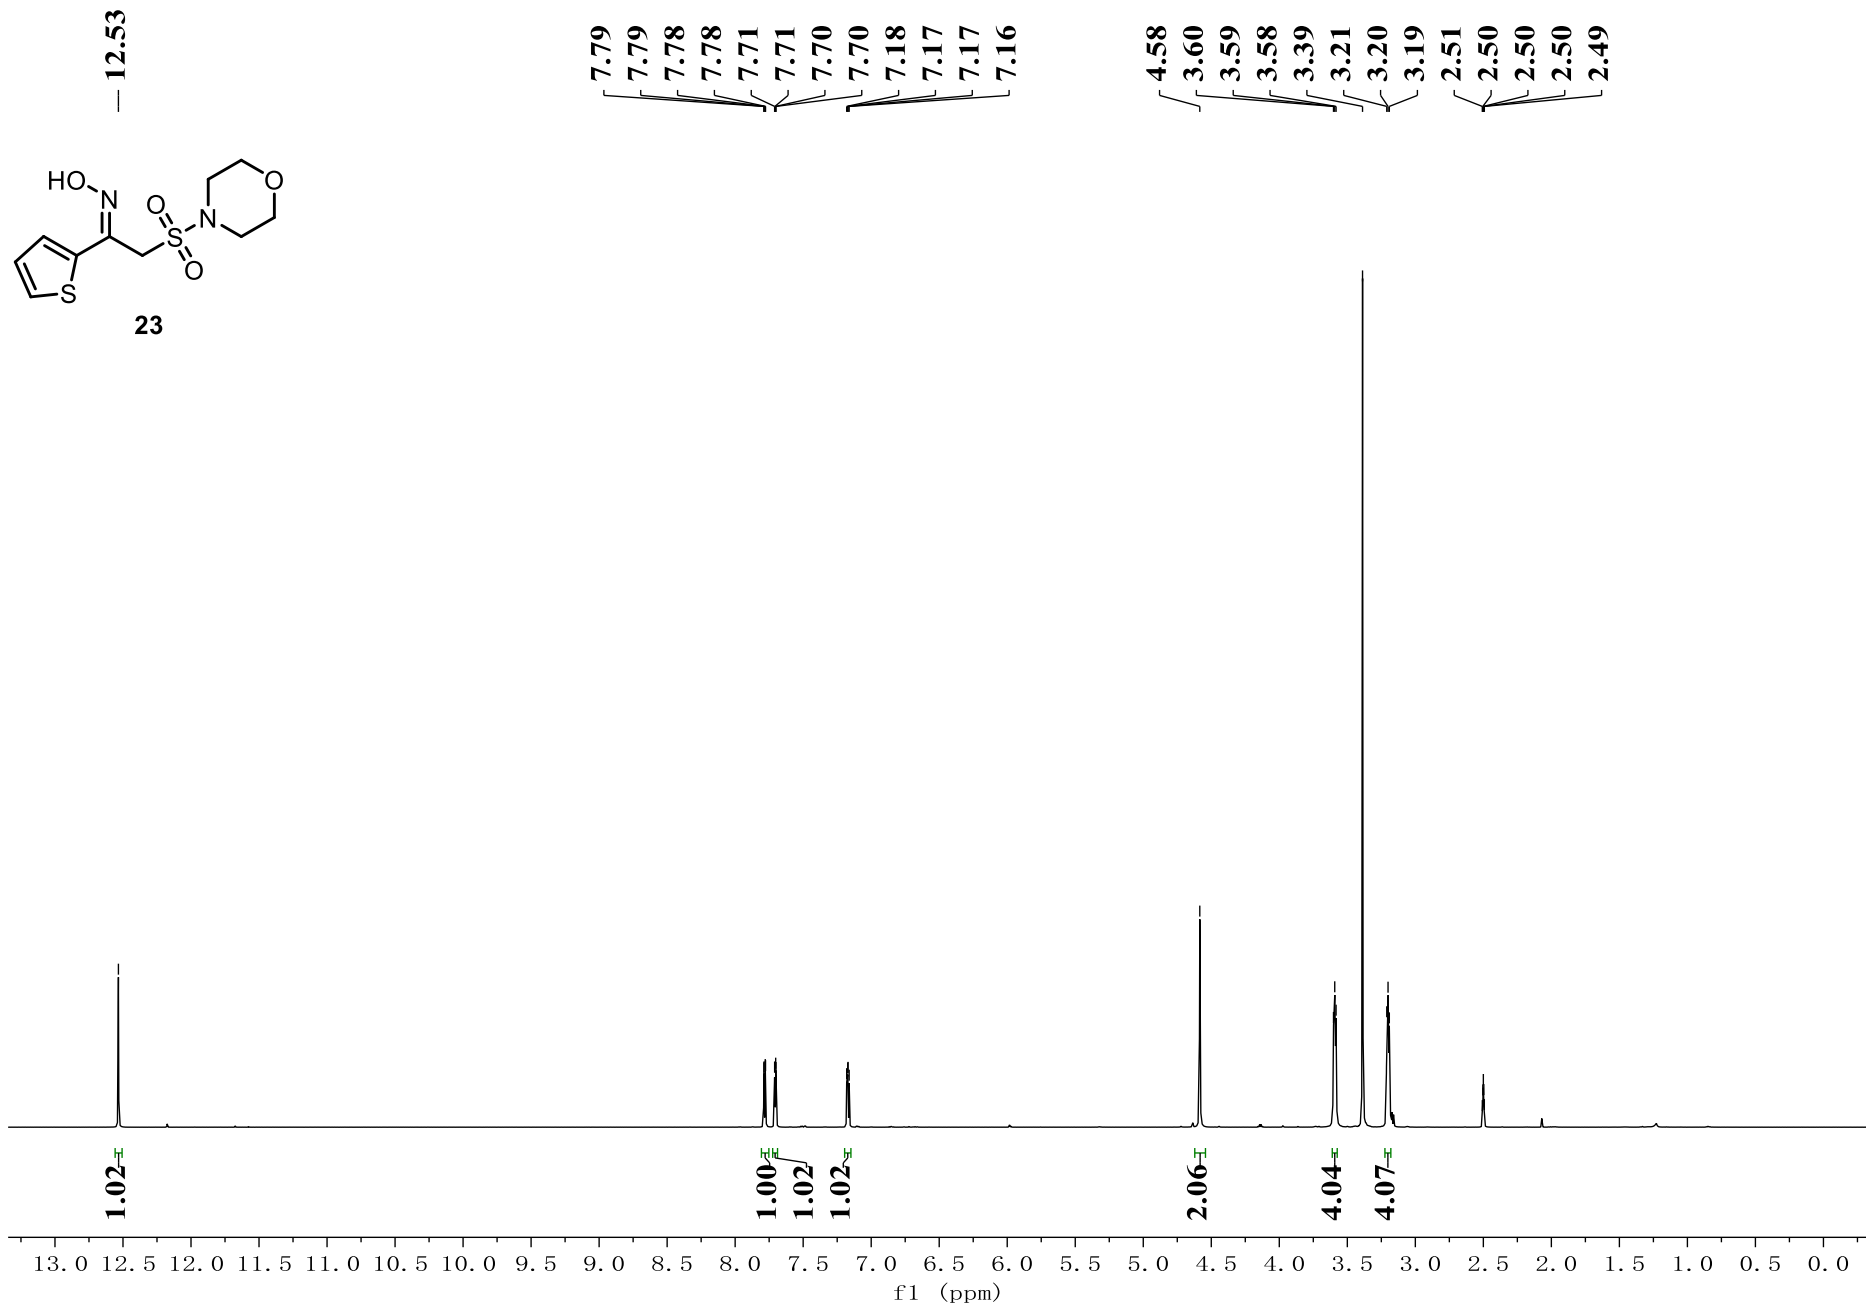



<sup>13</sup>C NMR (125 MHz, DMSO-*d*<sub>6</sub>) for 23

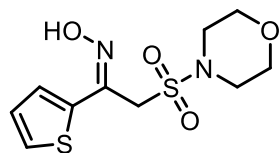

23

140.56  
131.23  
130.80  
130.62  
125.67

65.97  
52.72  
45.68  
40.02  
39.85  
39.69  
39.52  
39.35  
39.19  
39.02

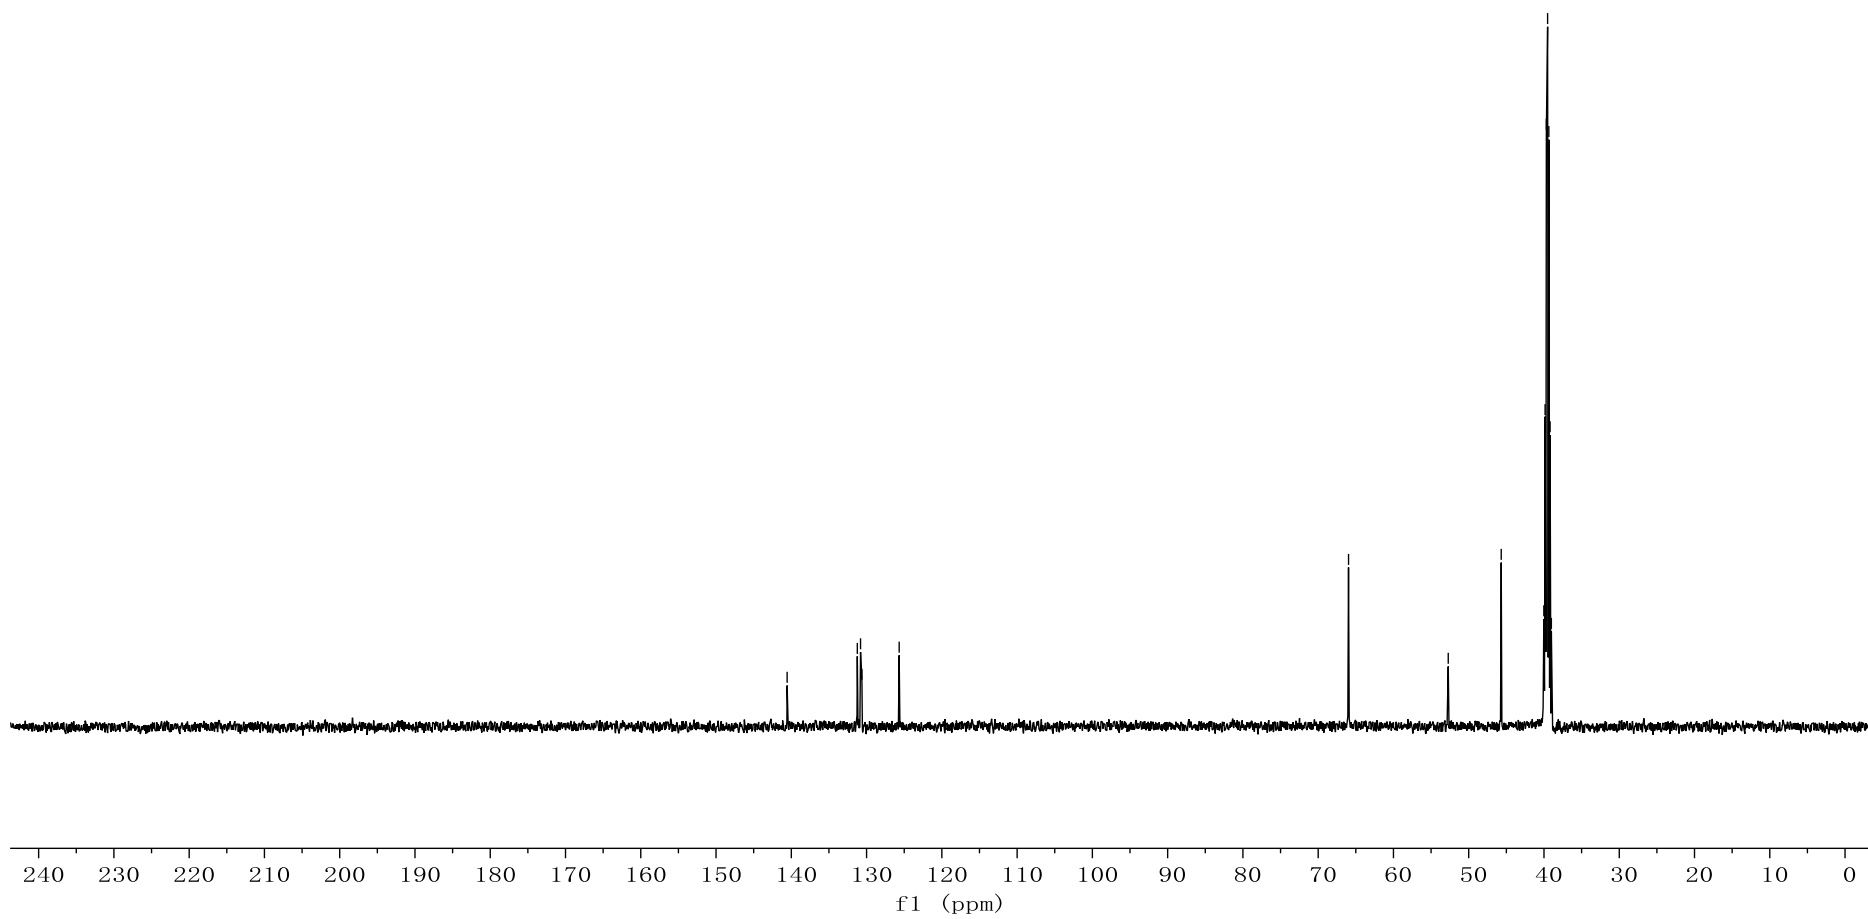

<sup>1</sup>H NMR (500 MHz, CDCl<sub>3</sub>) for 24

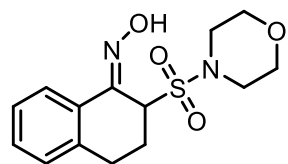

24

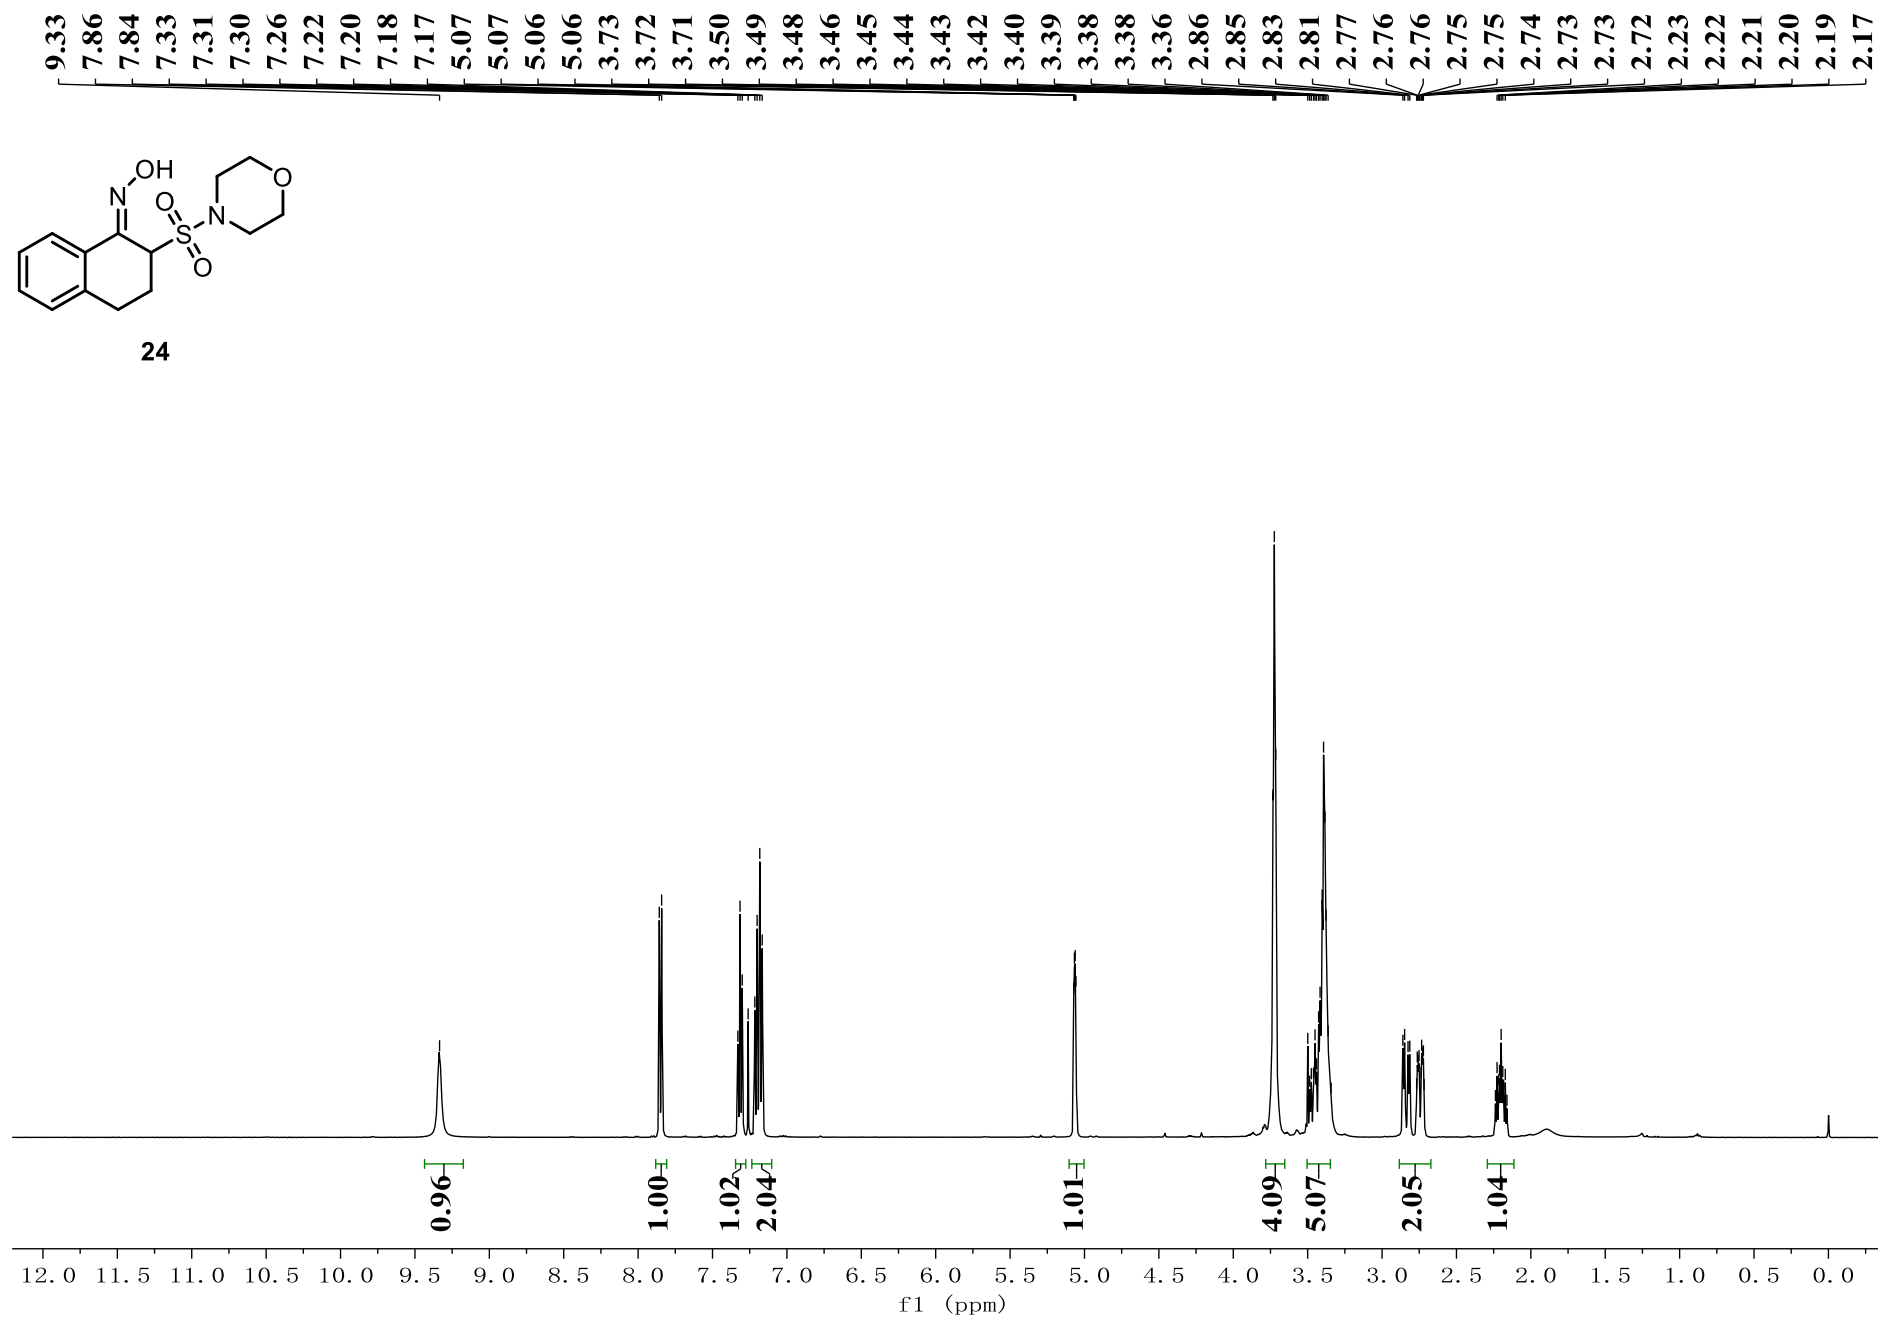

<sup>13</sup>C NMR (125 MHz, CDCl<sub>3</sub>) for 24

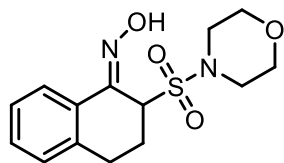

24

— 149.49  
— 138.10  
— 130.16  
— 129.31  
— 128.83  
— 126.51  
— 124.33  
  
— 77.41  
— 77.16  
— 76.91  
— 67.14  
  
— 51.65  
— 45.51  
  
— 25.35  
— 24.42

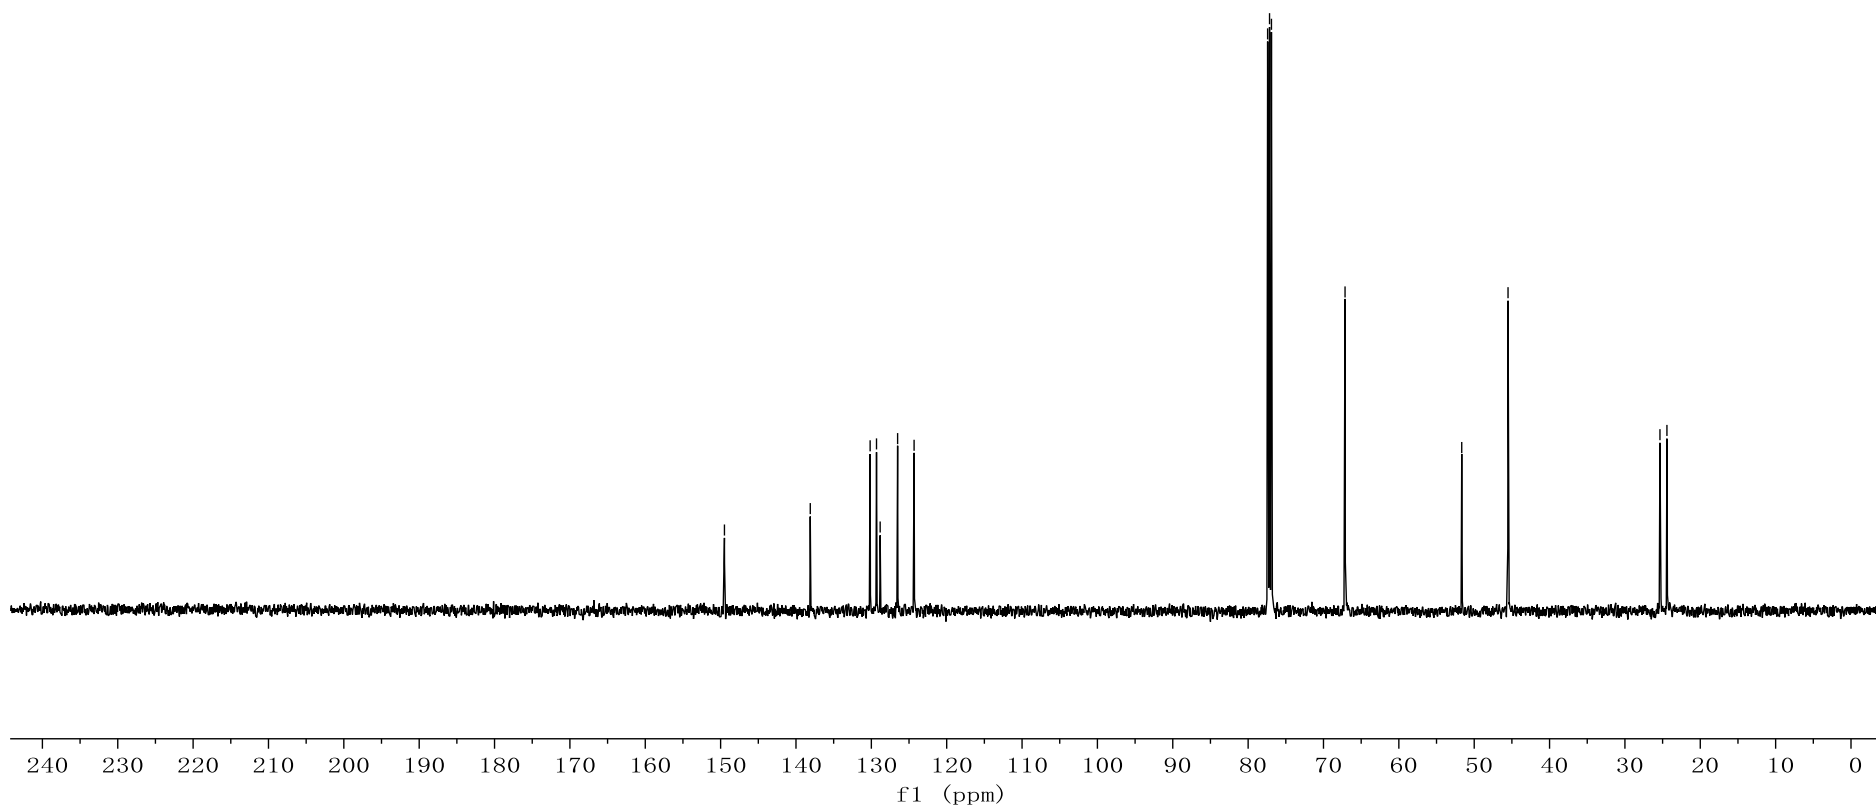

<sup>1</sup>H NMR (500 MHz, CDCl<sub>3</sub>) for 25

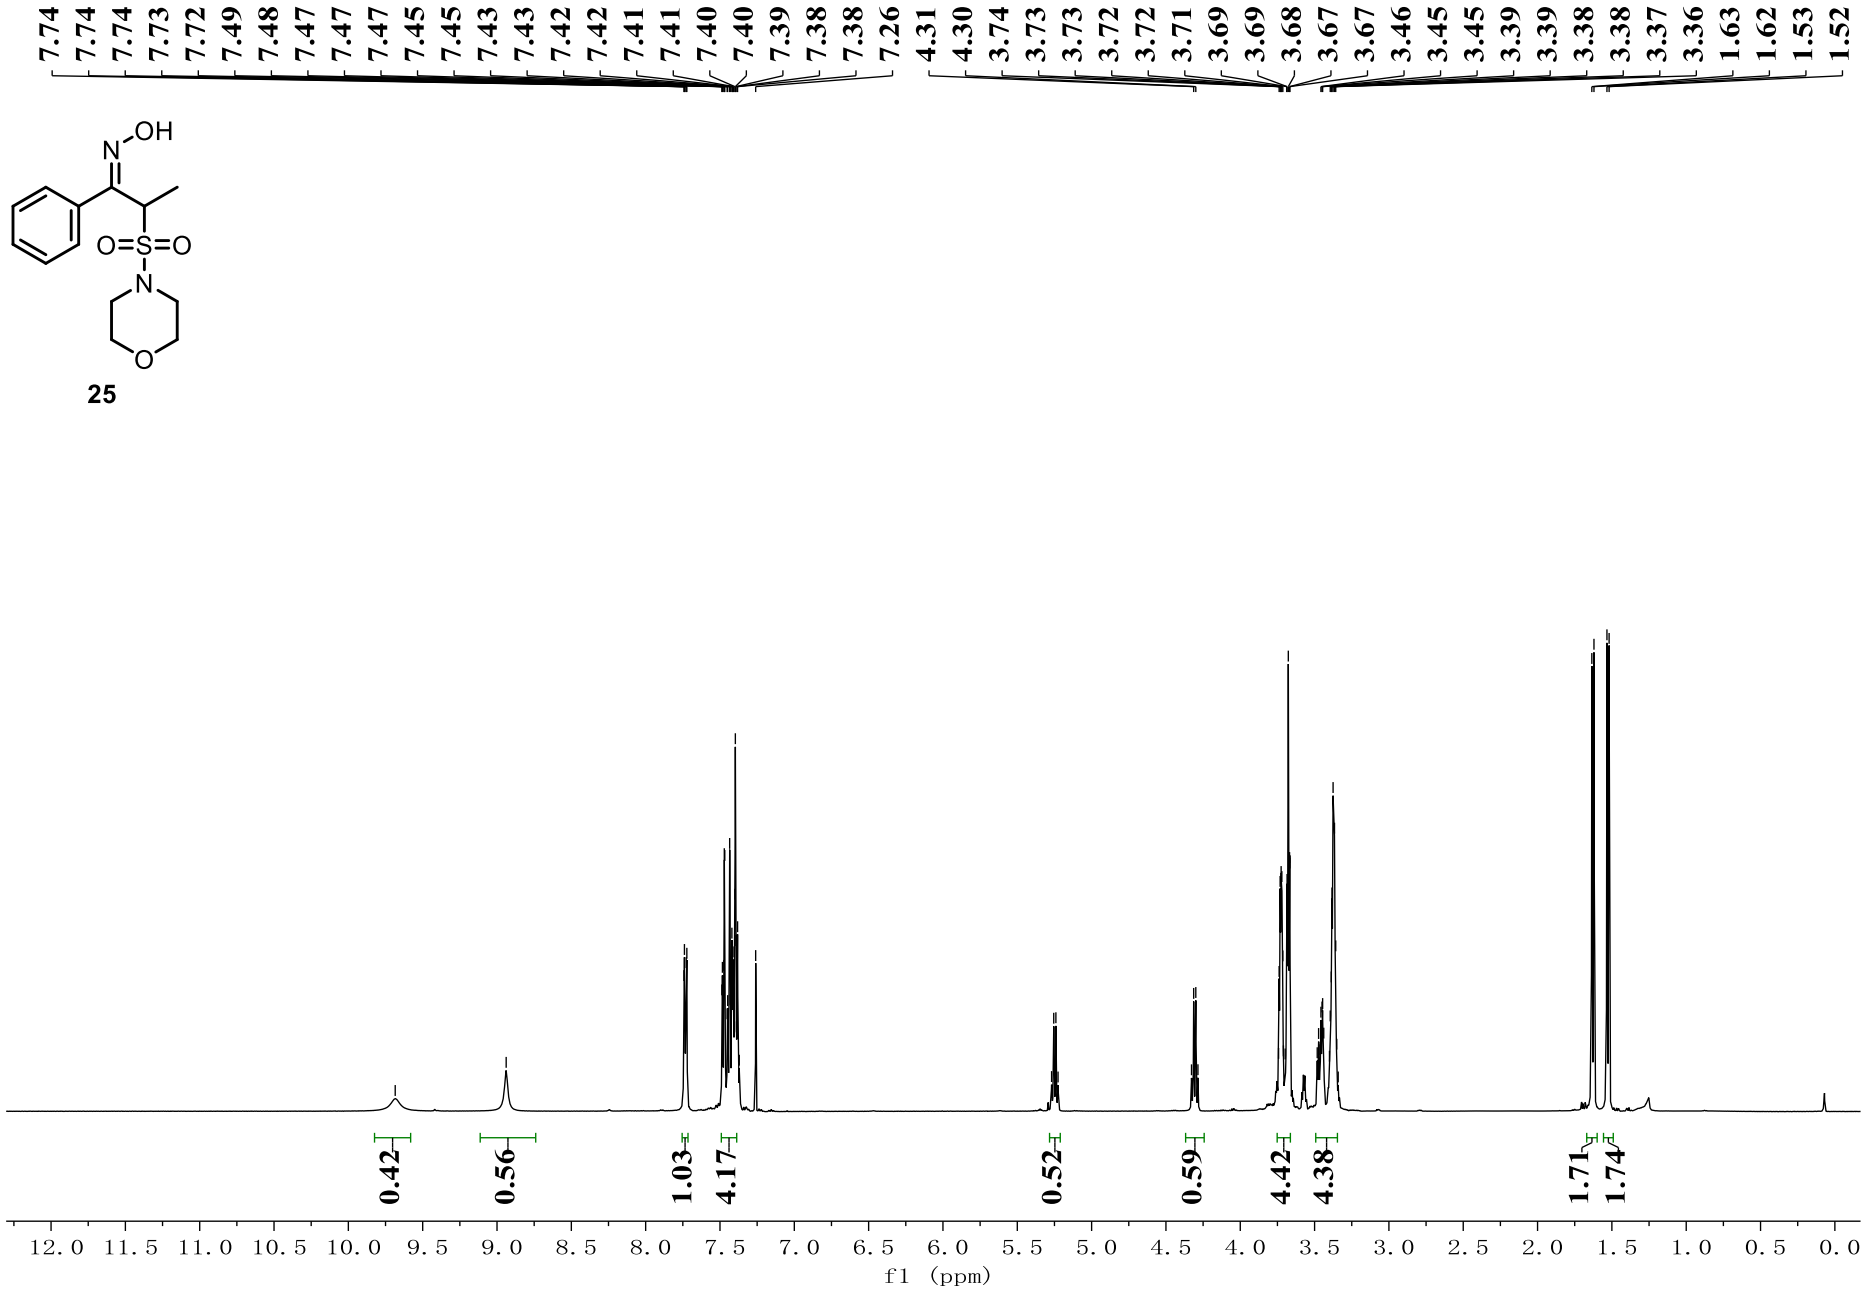

<sup>13</sup>C NMR (125 MHz, CDCl<sub>3</sub>) for 25

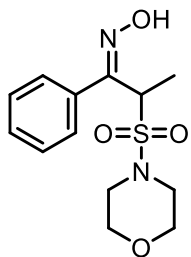

25

154.46  
153.42  
133.21  
131.80  
129.64  
129.61  
128.70  
128.53  
128.46  
128.26

77.41  
77.16  
76.91  
67.09  
62.36  
53.07  
46.58  
45.99

14.74  
14.14

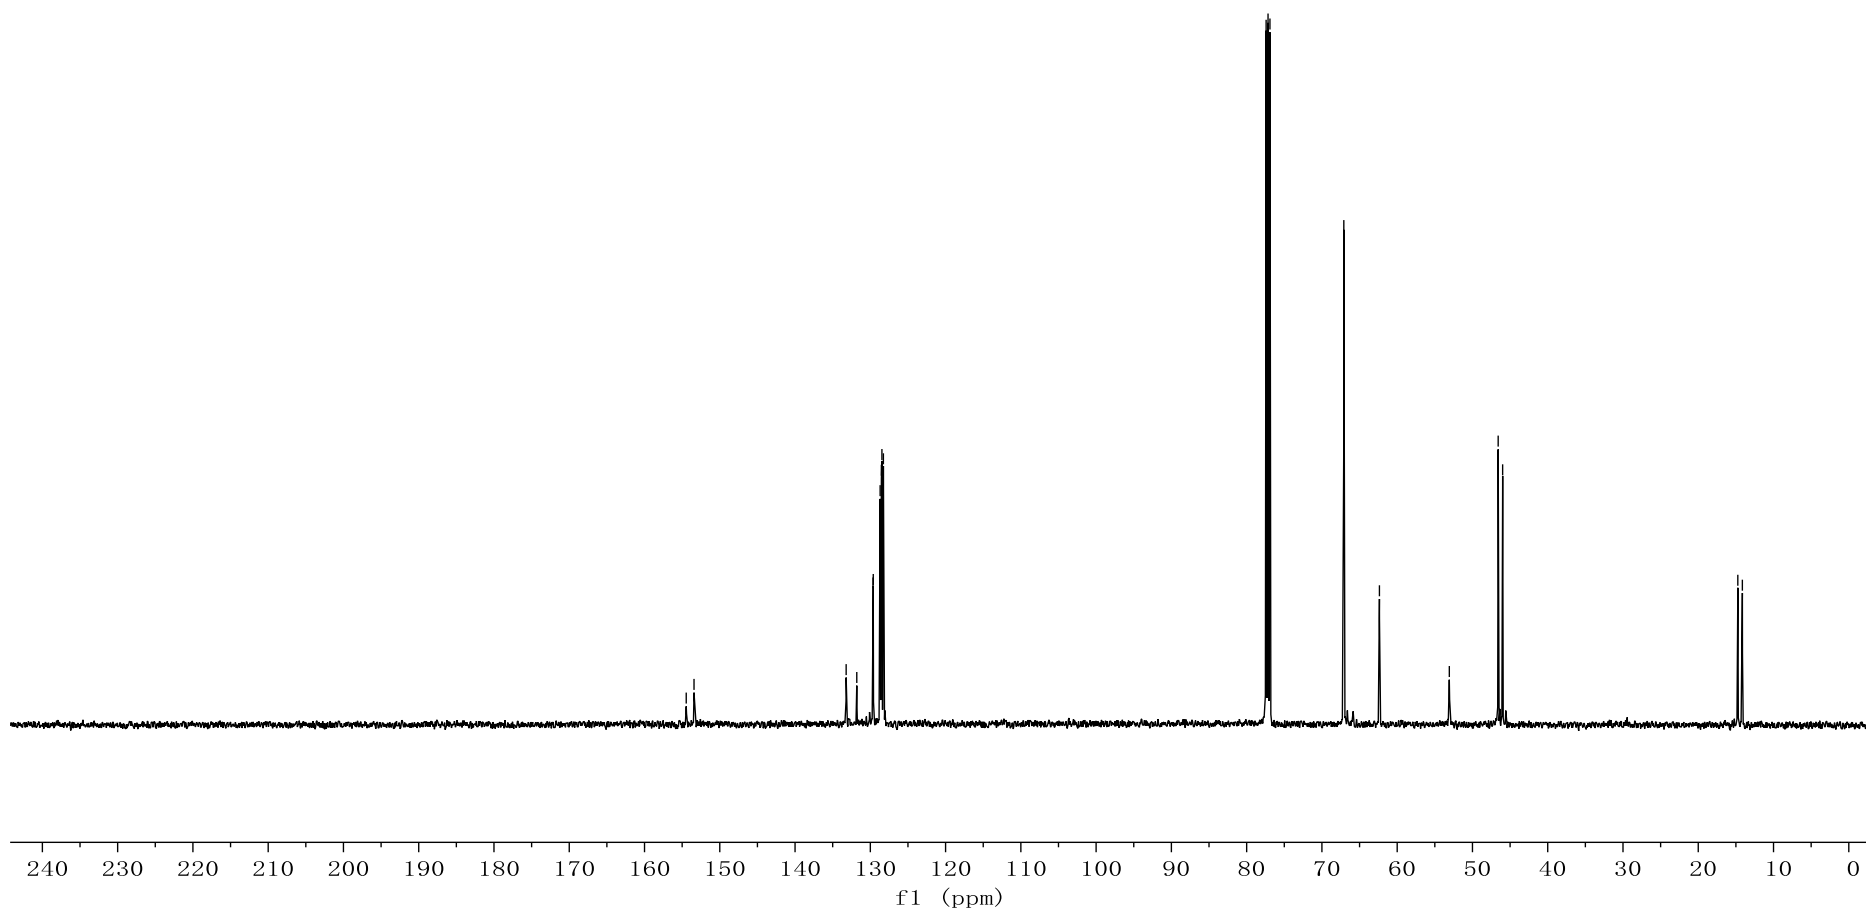

<sup>1</sup>H NMR (500 MHz, CDCl<sub>3</sub>) for *E*-26

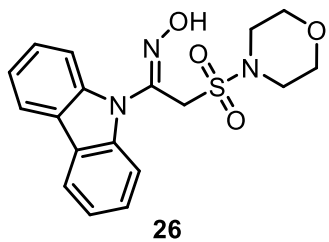

— 9.01  
8.08  
8.07  
7.49  
7.47  
7.45  
7.44  
7.42  
7.33  
7.32  
7.30  
7.26  
— 4.77  
3.17  
3.16  
3.15  
2.83  
2.82  
2.81

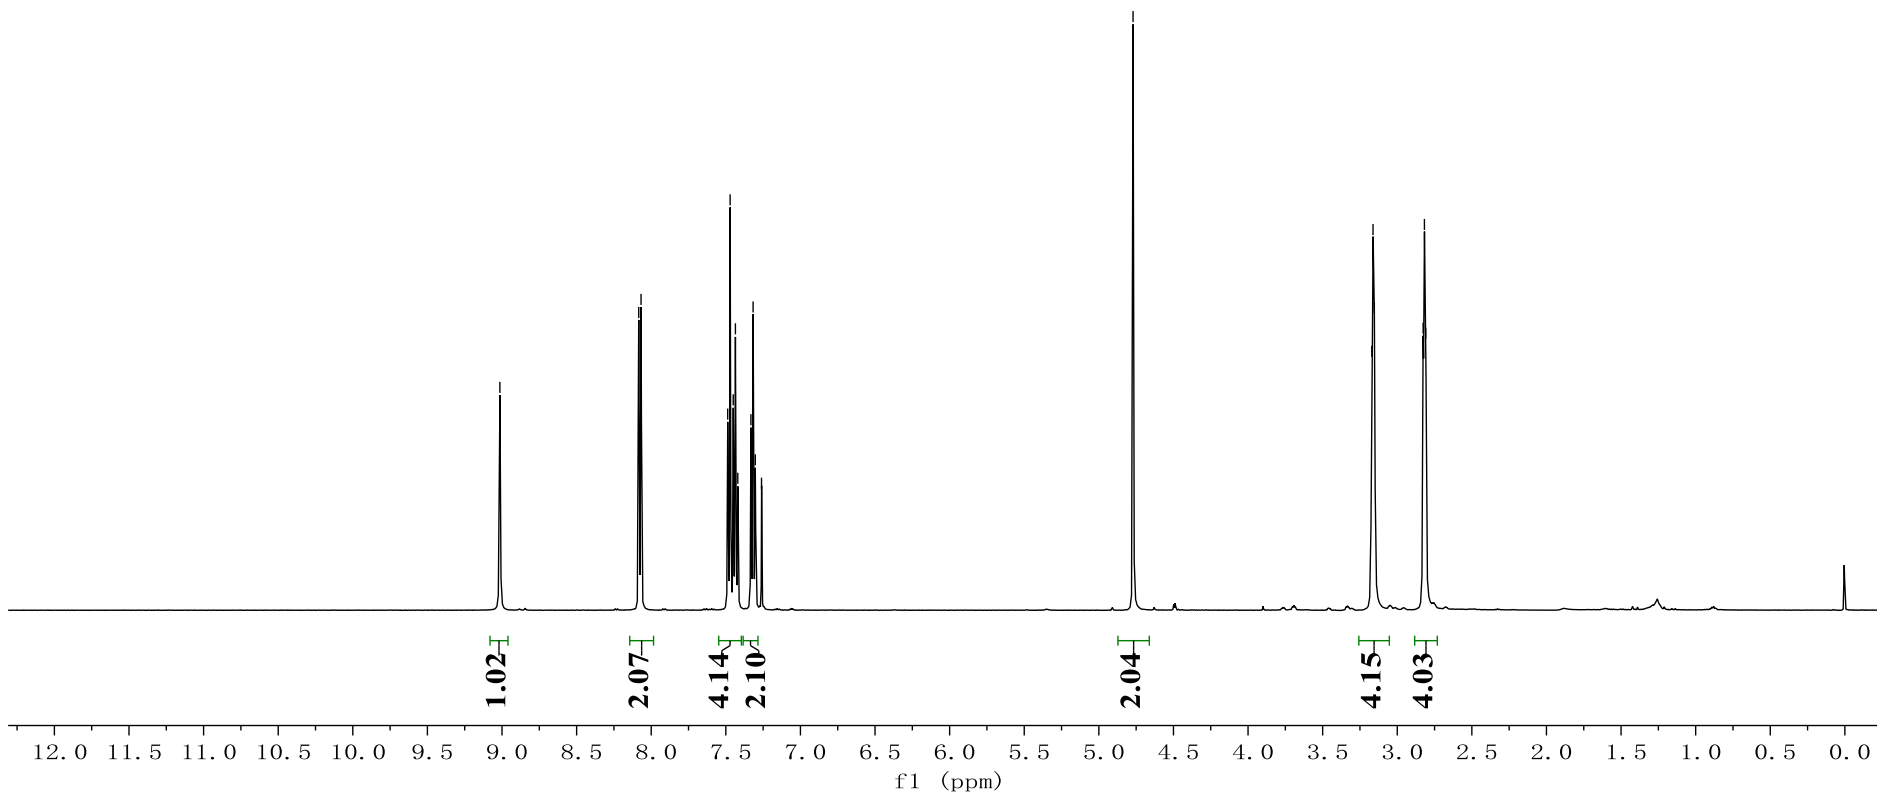

NOESY of E-26

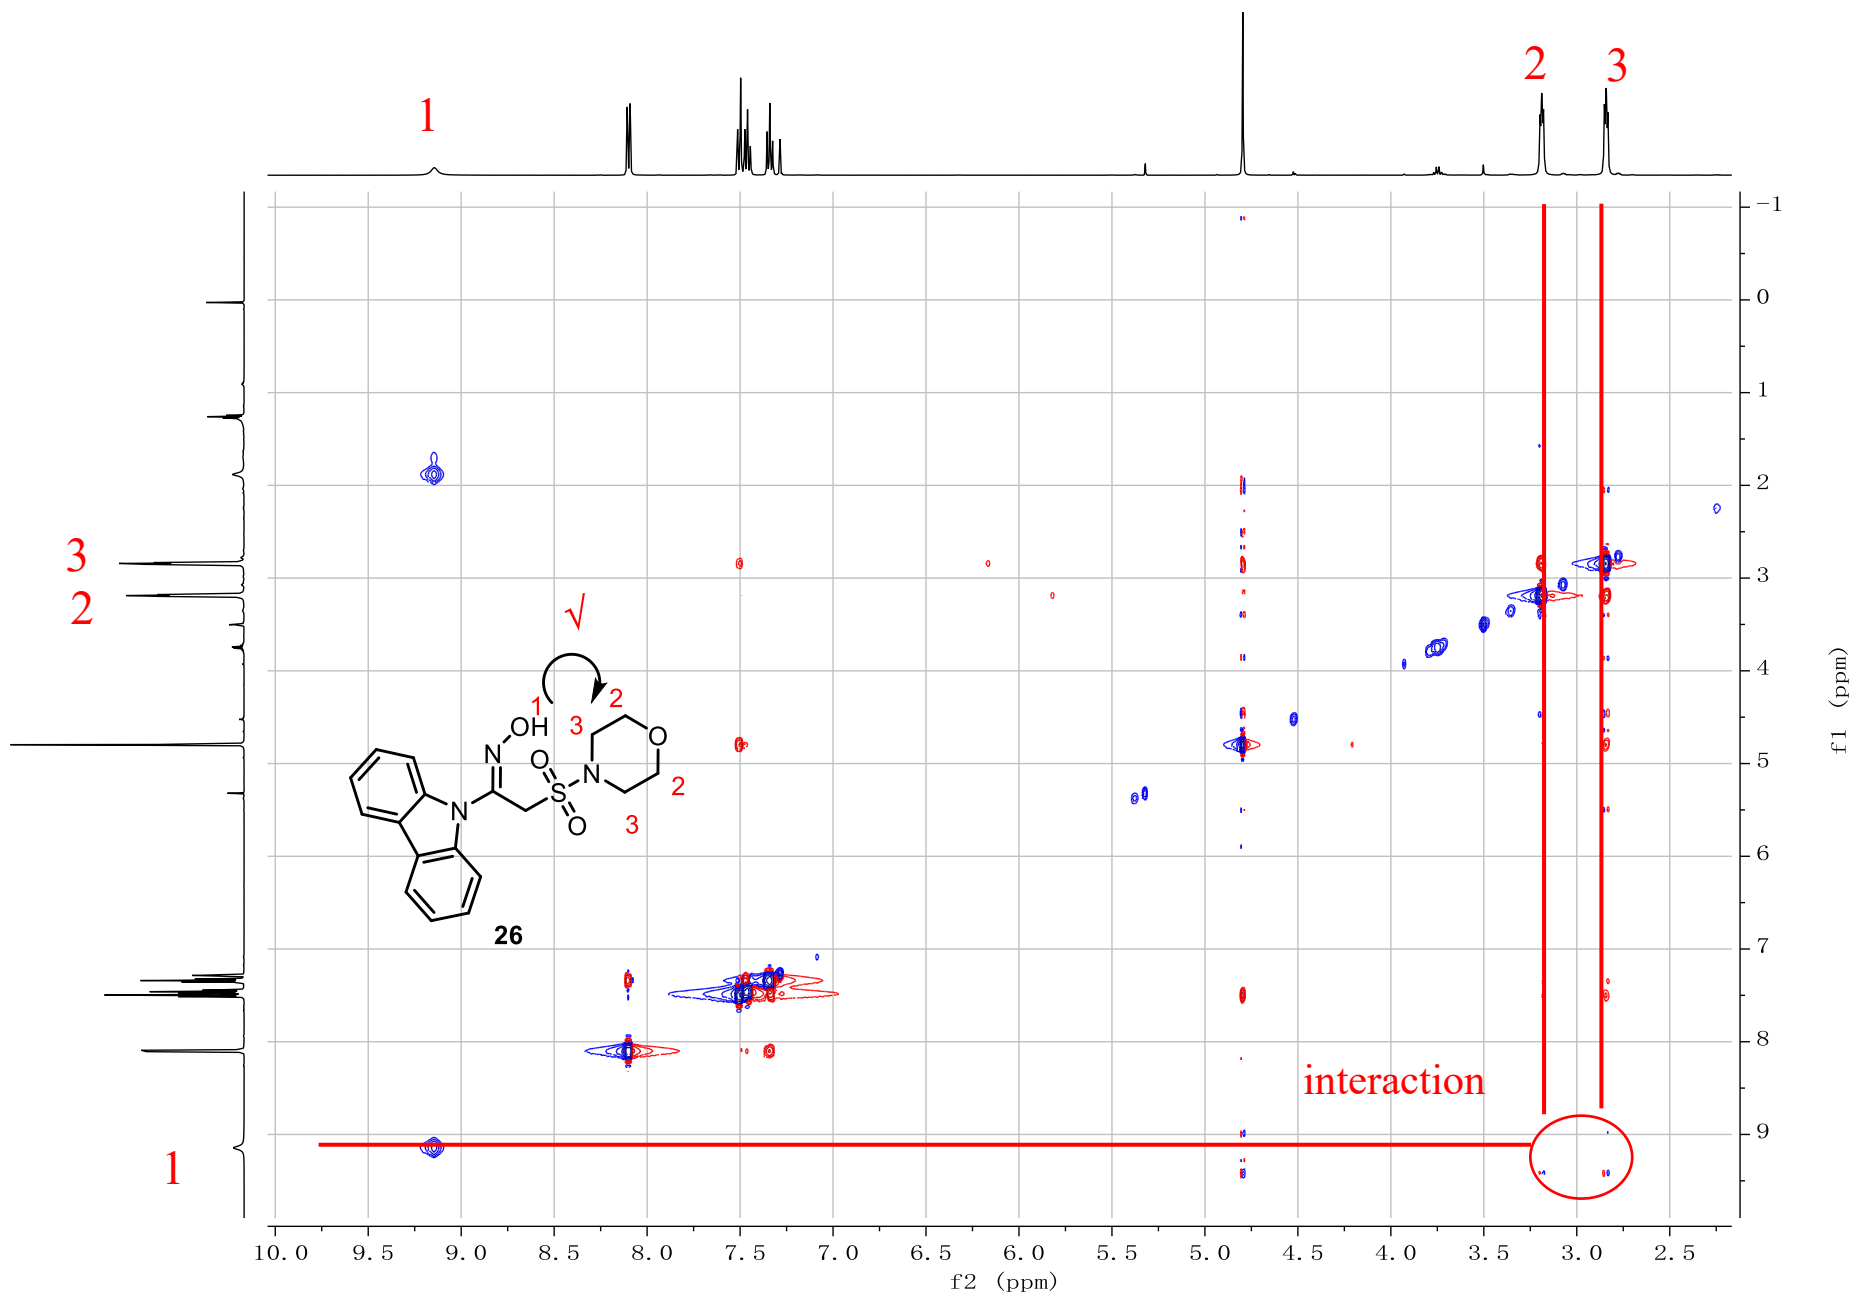

<sup>13</sup>C NMR (125 MHz, CDCl<sub>3</sub>) for *E*-26

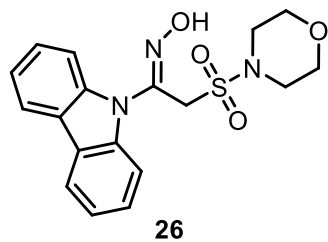

143.49  
139.51  
126.73  
124.30  
121.59  
120.76  
110.70  
77.42  
77.16  
76.91  
66.04  
45.25

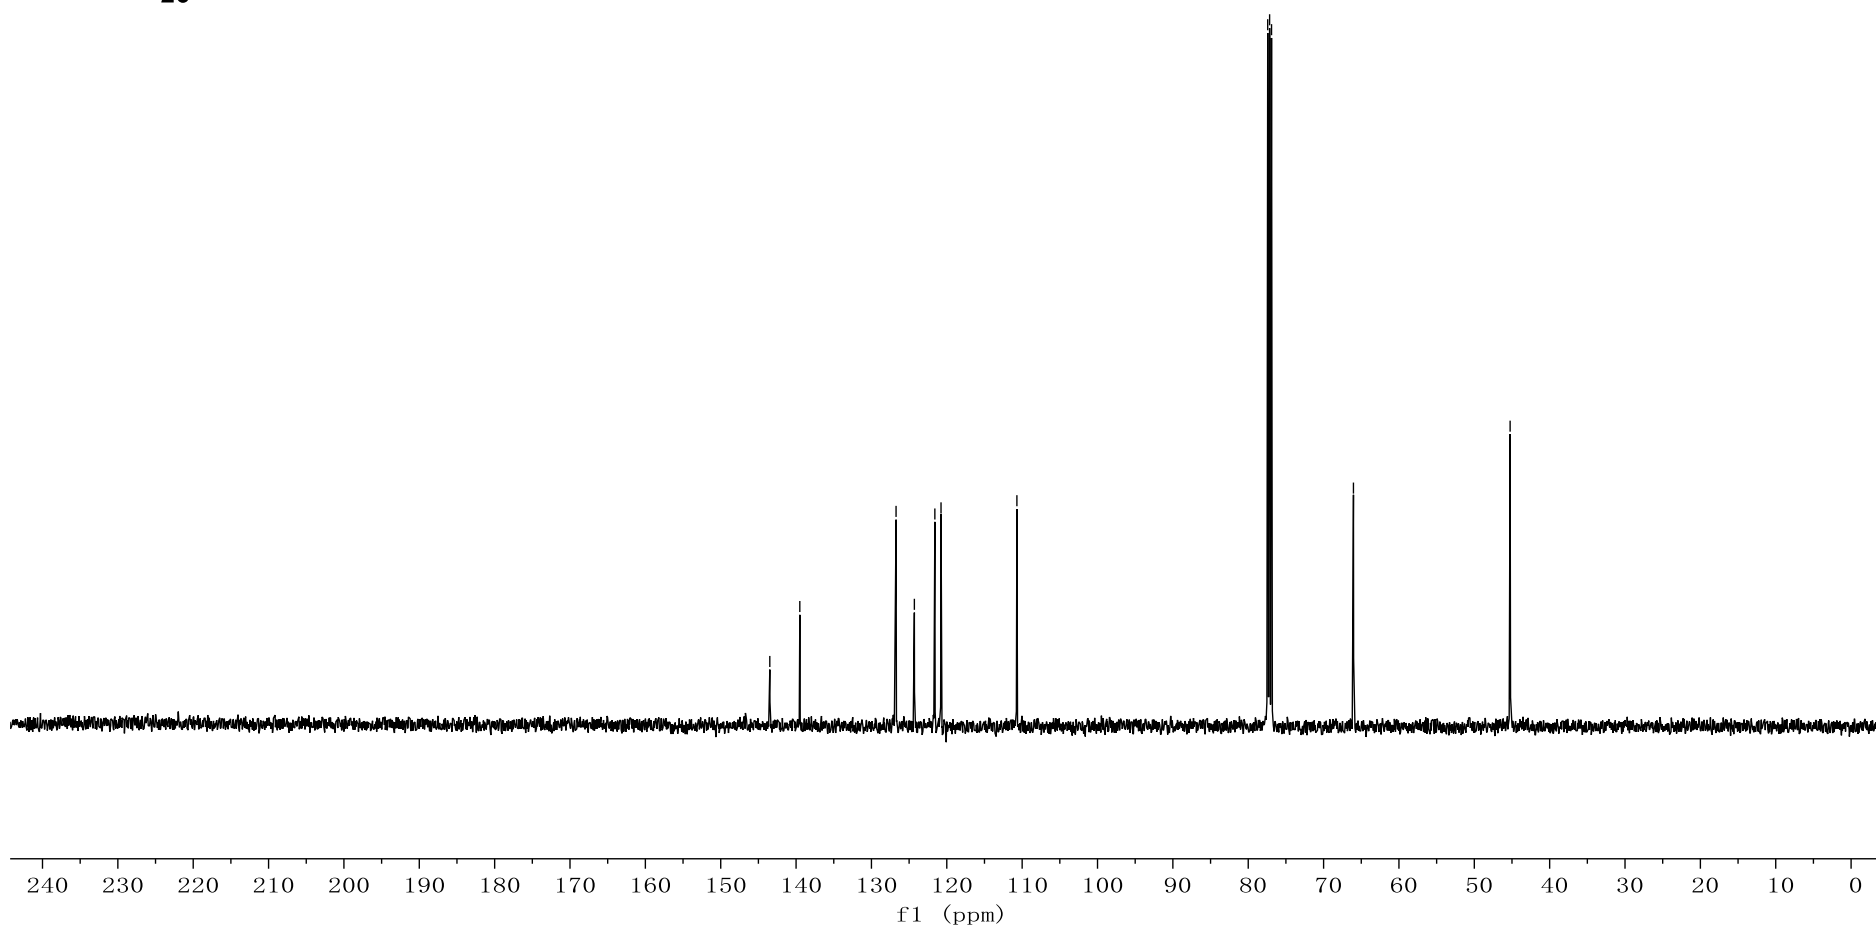



<sup>1</sup>H NMR (500 MHz, CDCl<sub>3</sub>) for Z-26

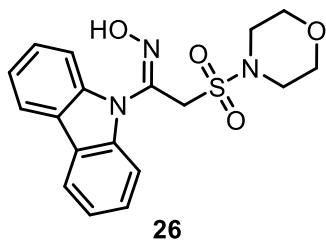

— 9.17

8.09  
8.07  
7.46  
7.45  
7.43  
7.34  
7.32  
7.31  
7.29  
7.27  
7.26

— 4.50

3.04  
3.03  
3.02  
2.74  
2.73  
2.72

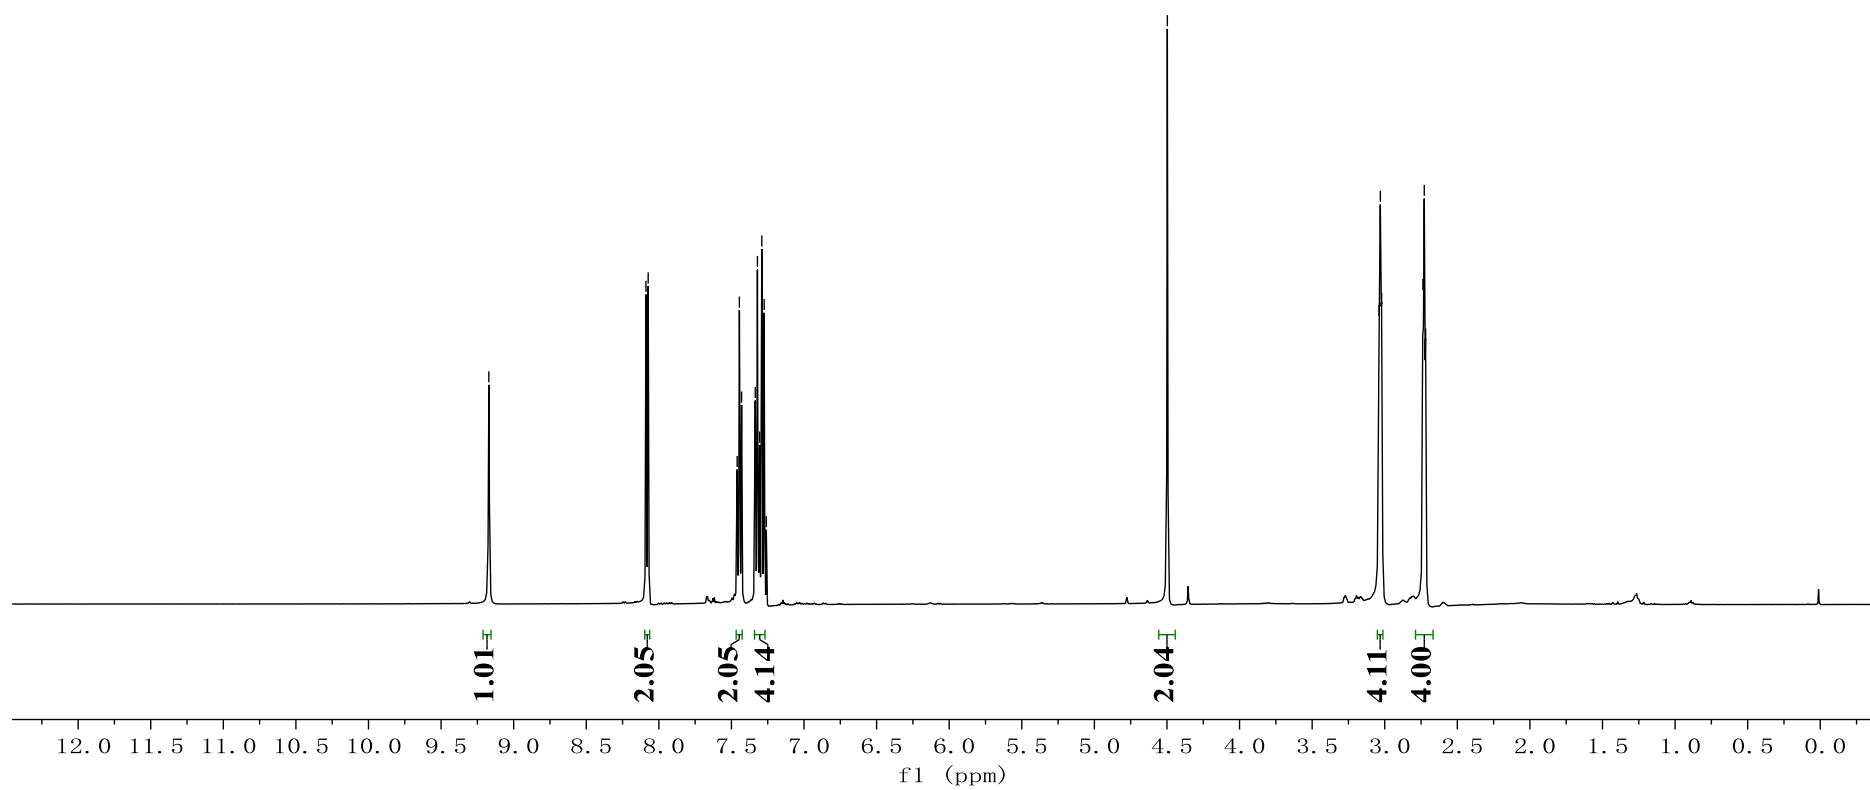

# NOESY of Z-26

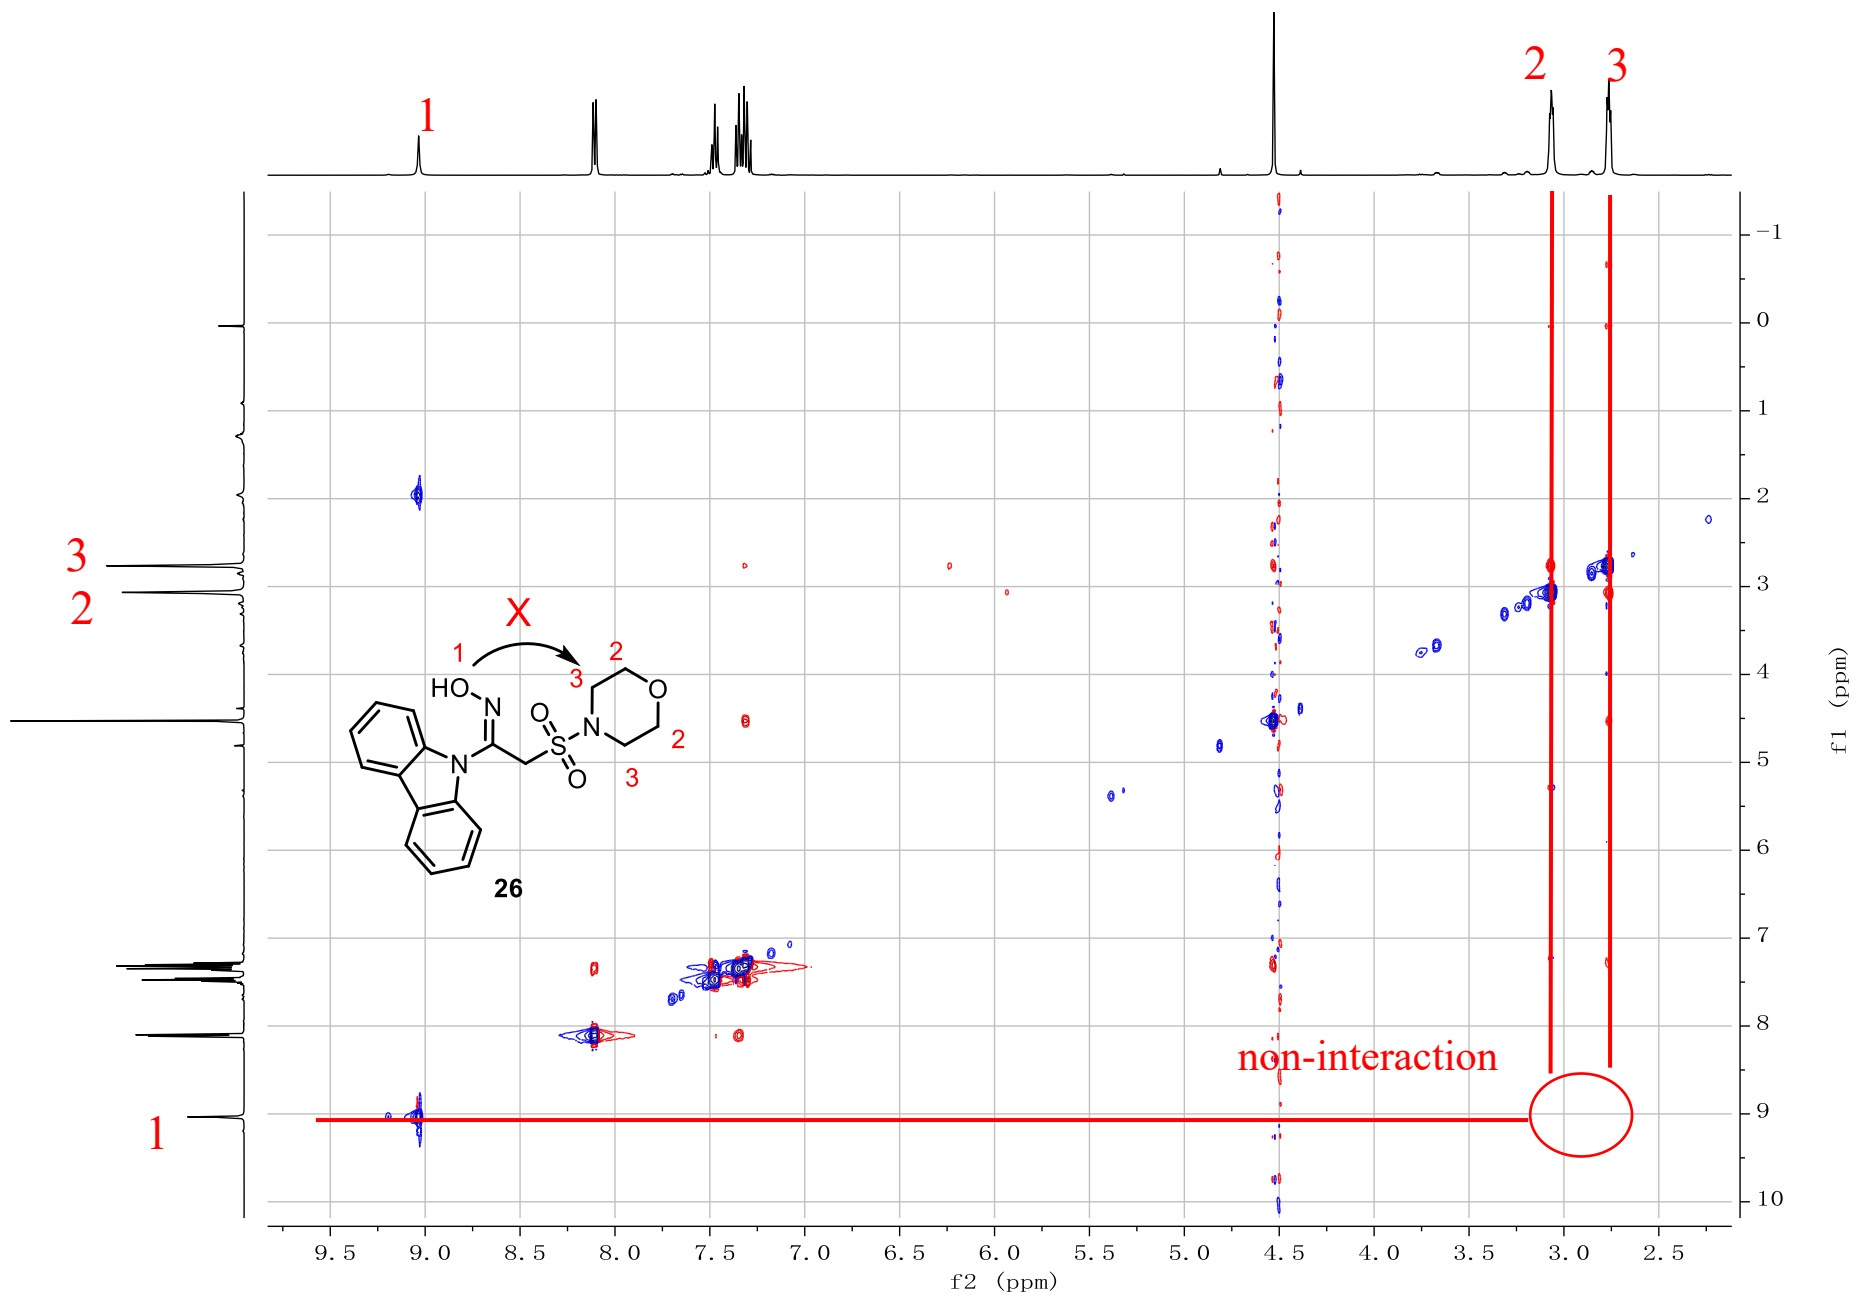

<sup>13</sup>C NMR (125 MHz, CDCl<sub>3</sub>) for Z-26

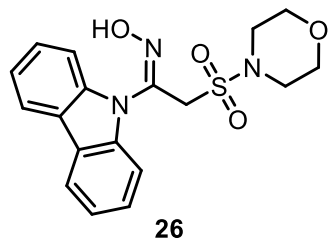

138.45  
138.19  
126.56  
124.23  
121.47  
120.69  
111.84

77.41  
77.16  
76.91  
65.85

50.87  
45.35

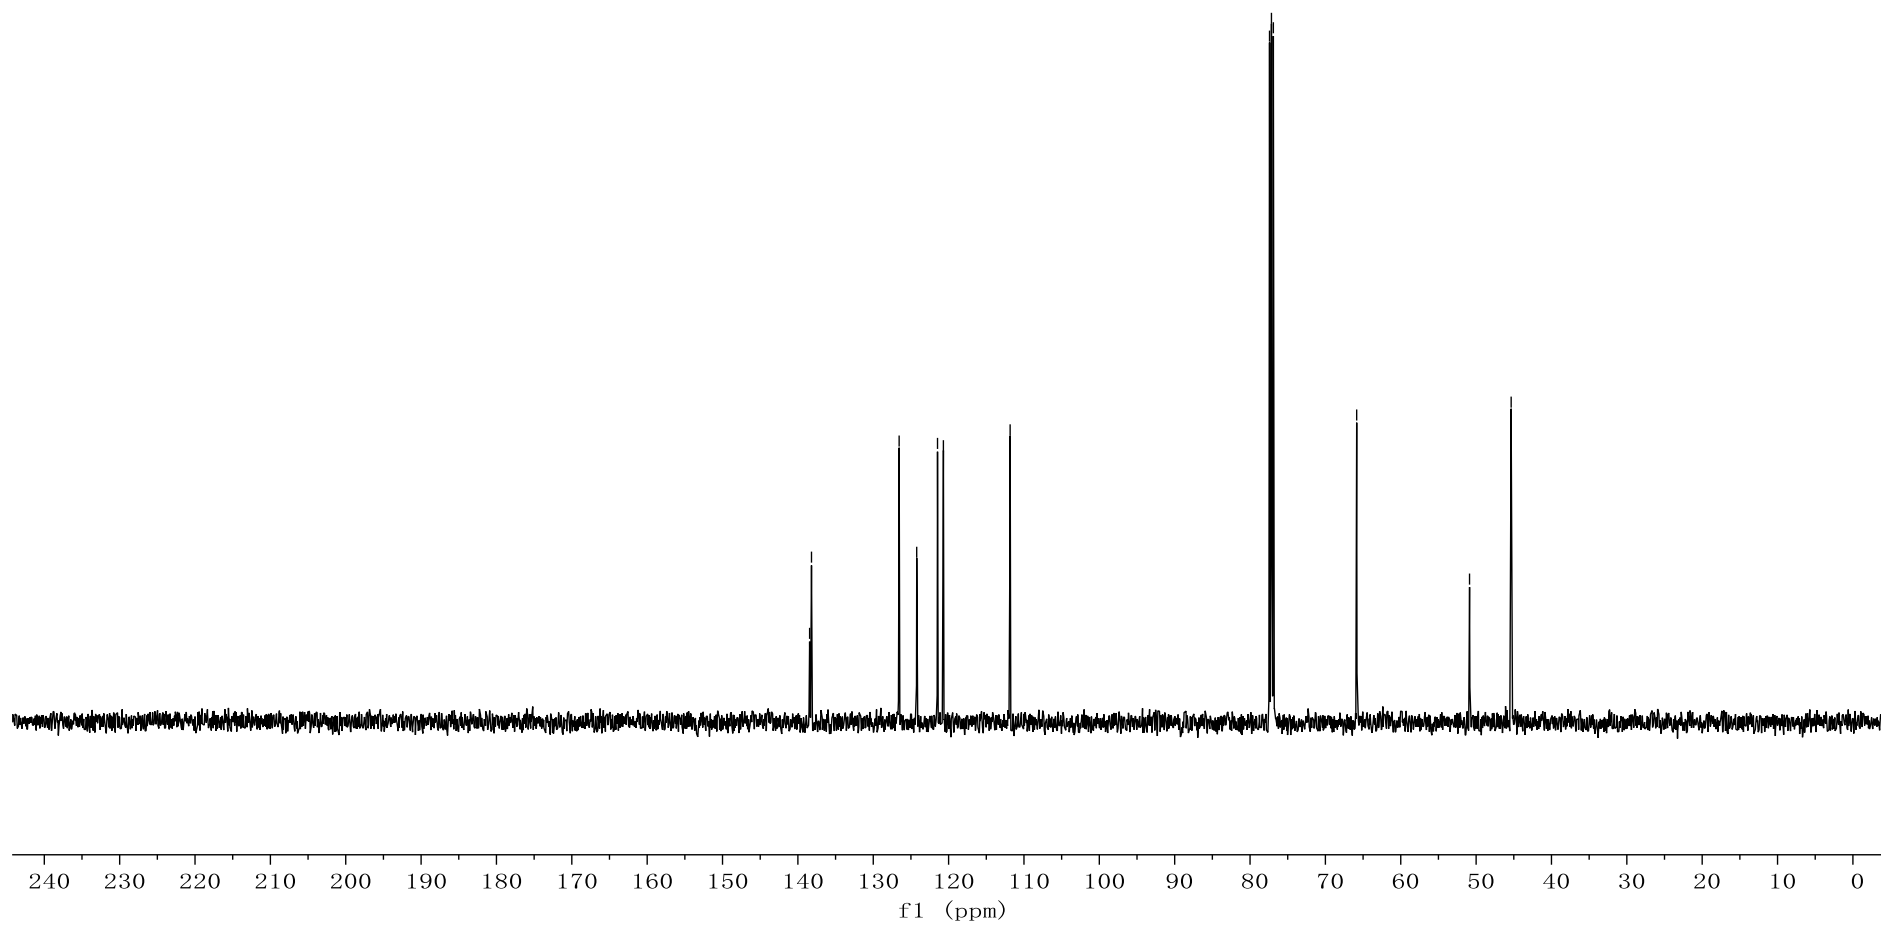

<sup>1</sup>H NMR (500 MHz, CDCl<sub>3</sub>) for 27

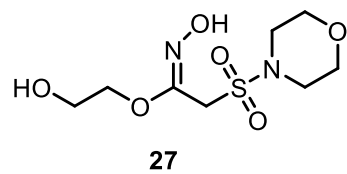

— 8.11

— 7.26

4.20  
4.19  
4.18  
4.15  
3.85  
3.84  
3.83  
3.75  
3.74  
3.73  
3.36  
3.35  
3.34

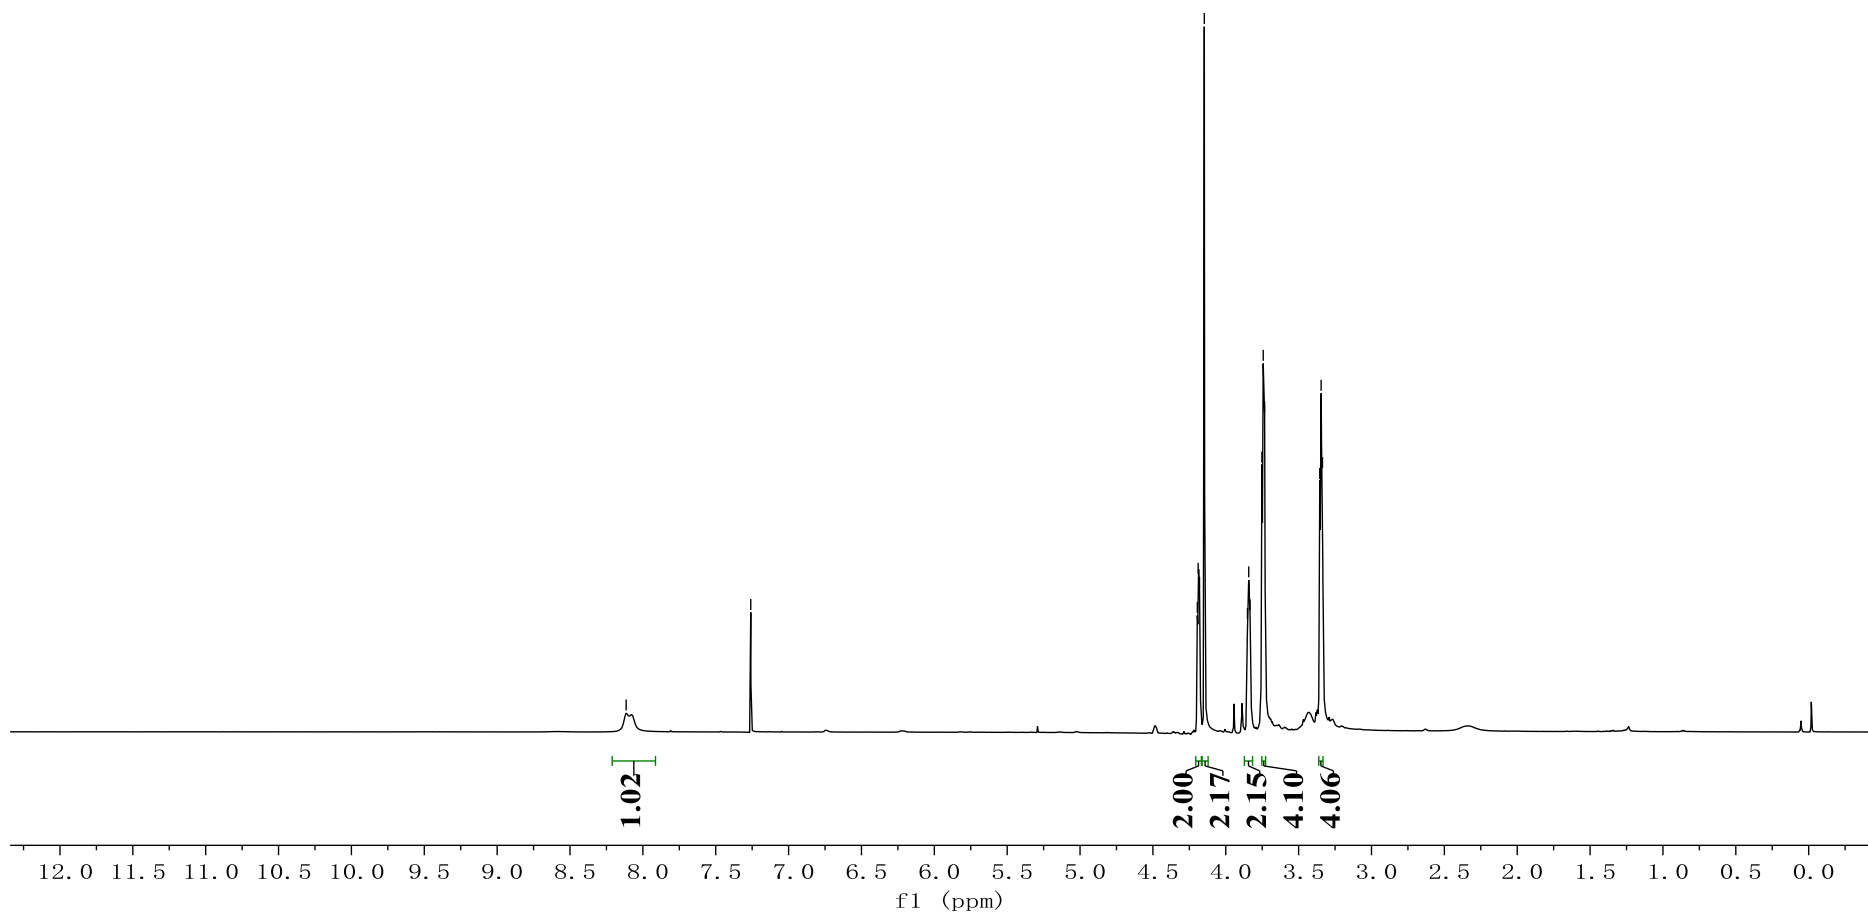

<sup>13</sup>C NMR (125 MHz, CDCl<sub>3</sub>) for 27

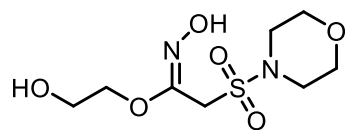

27

— 155.21

77.42  
77.16  
76.91  
69.55  
66.76  
60.88  
45.98  
45.62

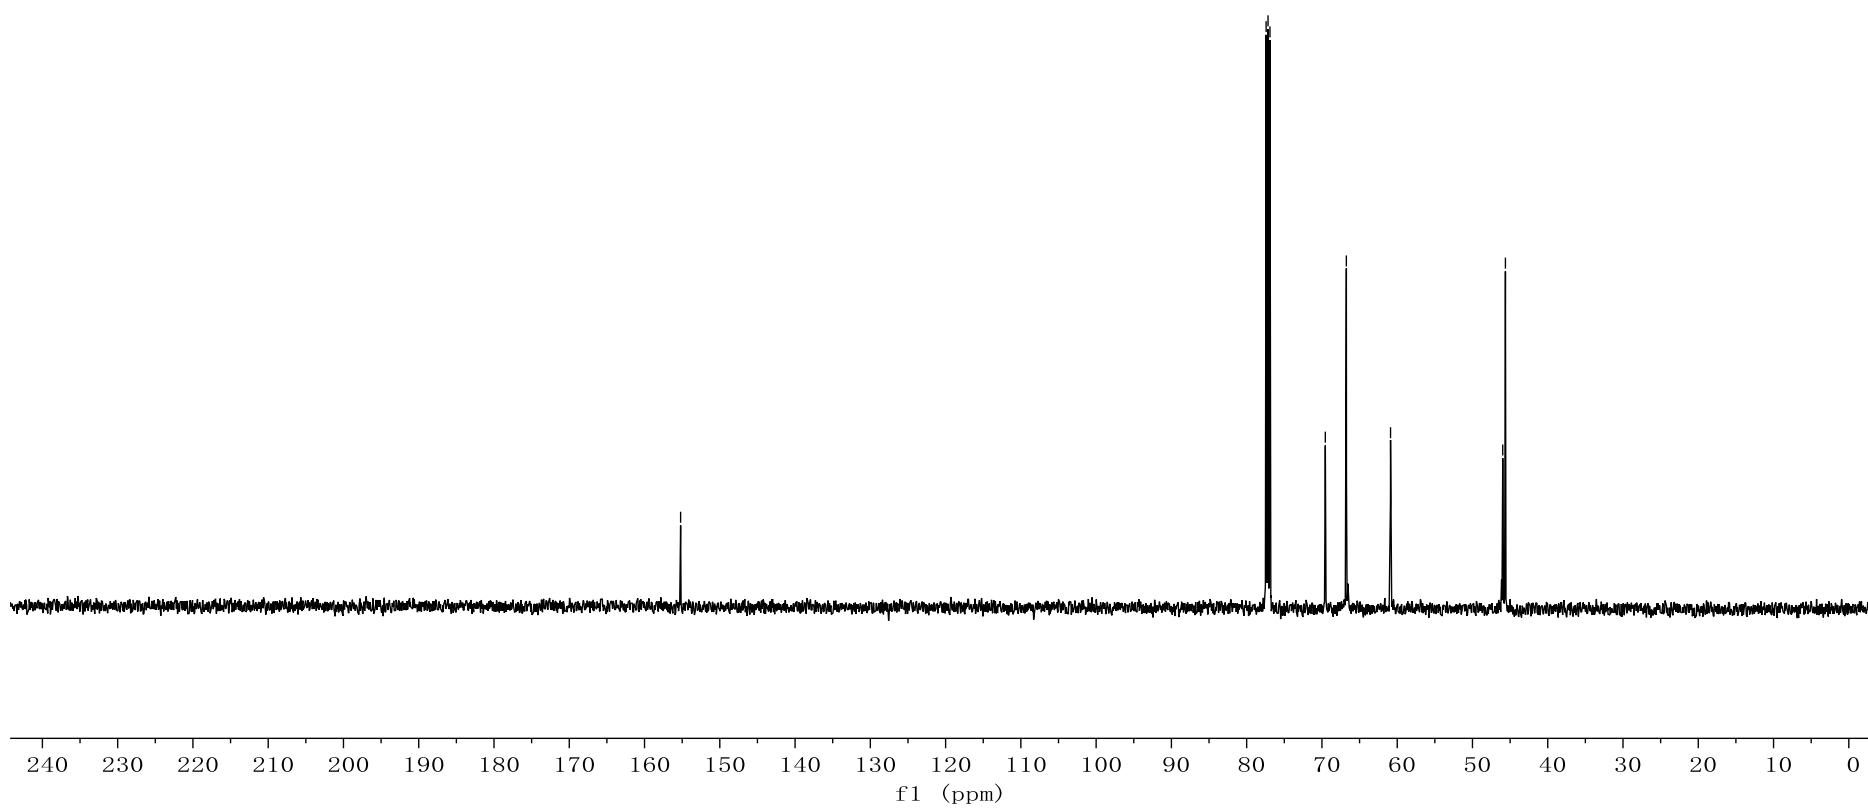

<sup>1</sup>H NMR (500 MHz, DMSO-d<sub>6</sub>) for 28

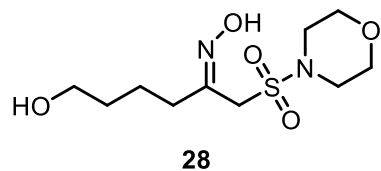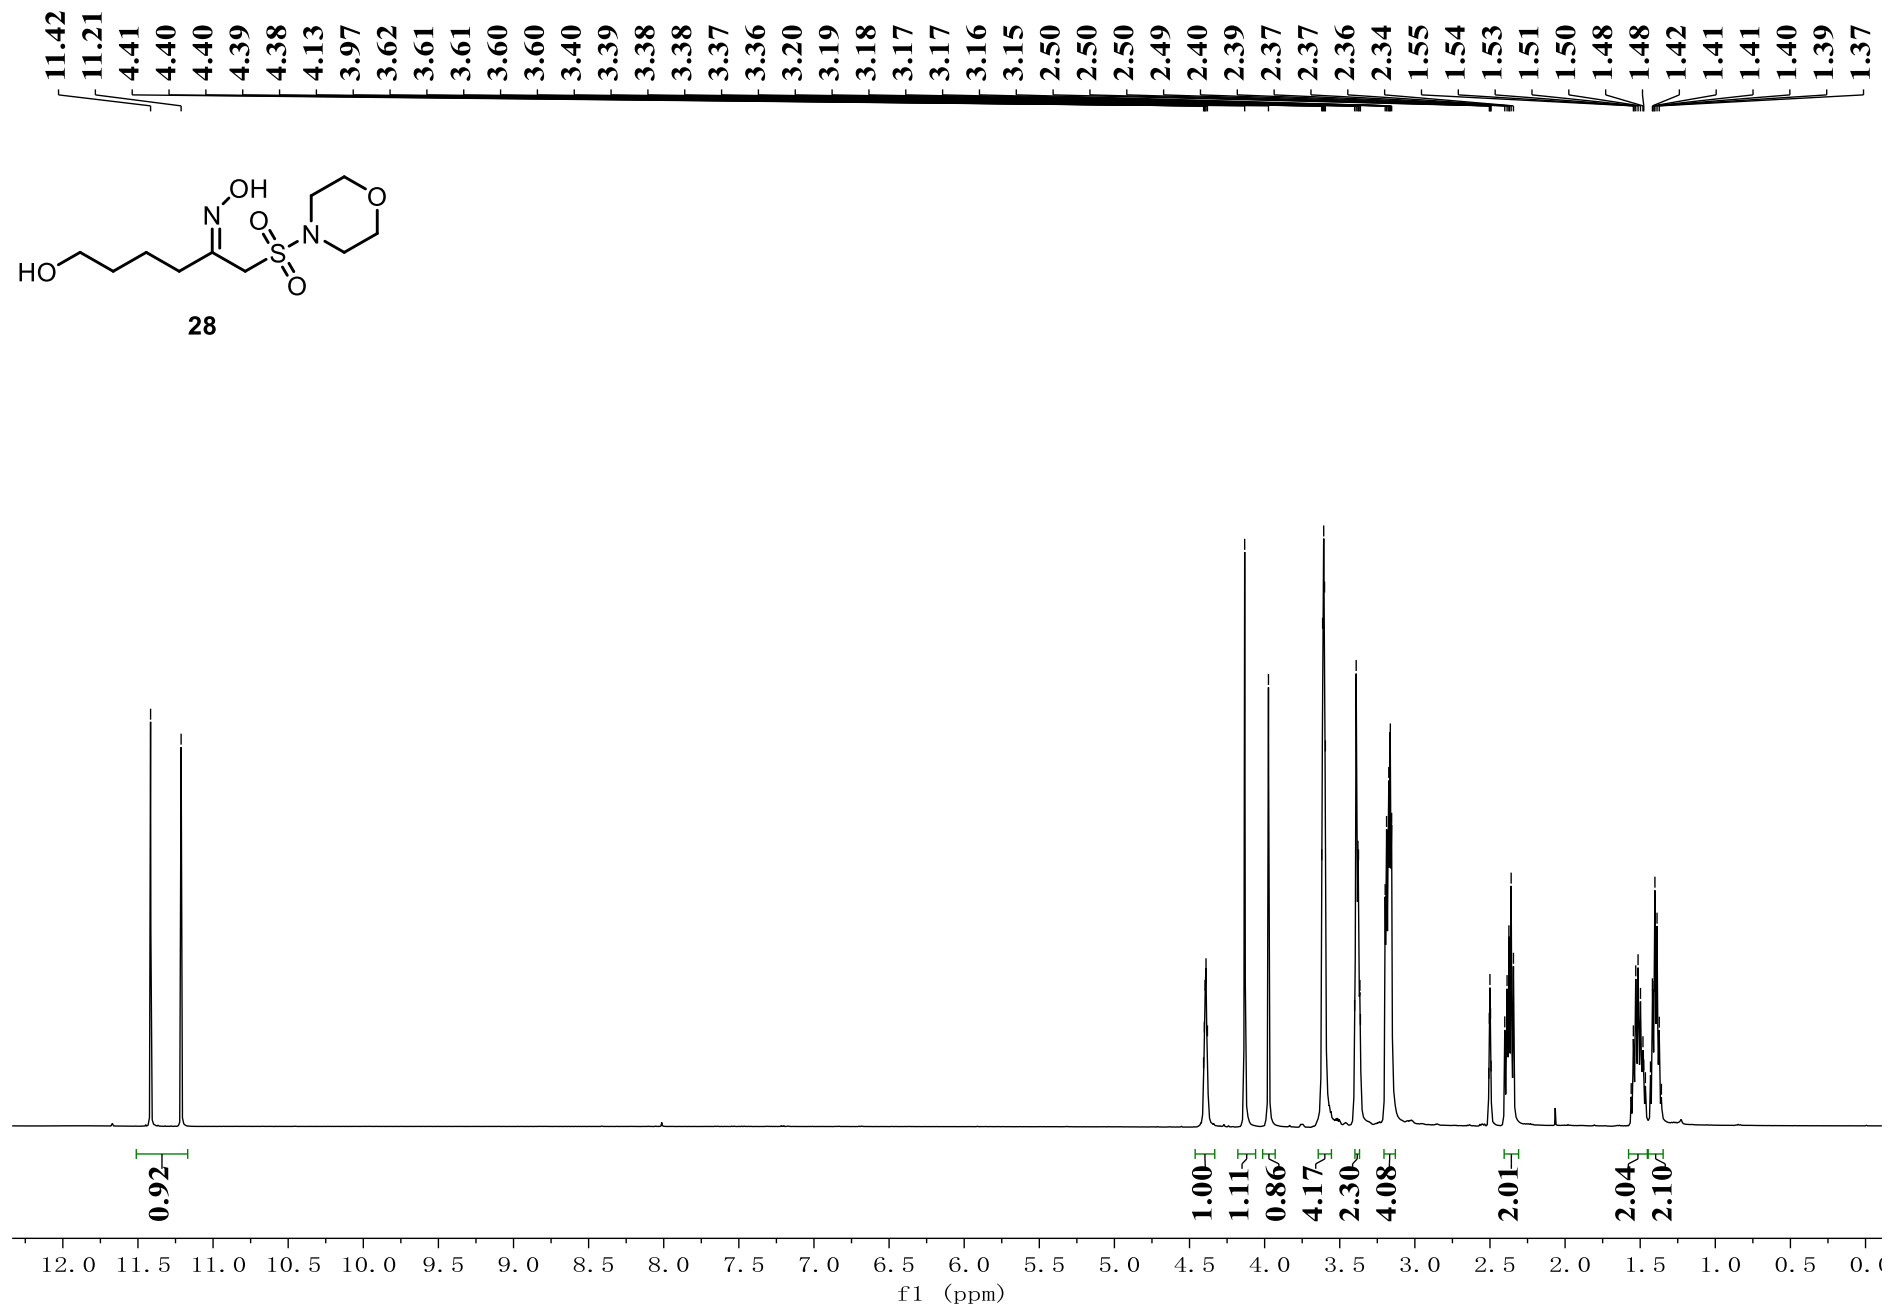

<sup>13</sup>C NMR (125 MHz, DMSO-*d*<sub>6</sub>) for 28

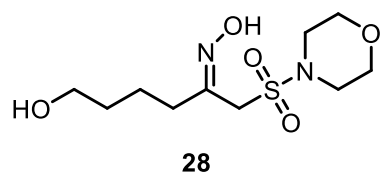

~ 150.60  
~ 147.85

65.93  
60.47  
52.56  
45.68  
45.25  
44.89  
40.02  
39.85  
39.69  
39.52  
39.35  
39.19  
39.02  
33.03  
32.63  
32.06  
27.19  
22.00  
21.30

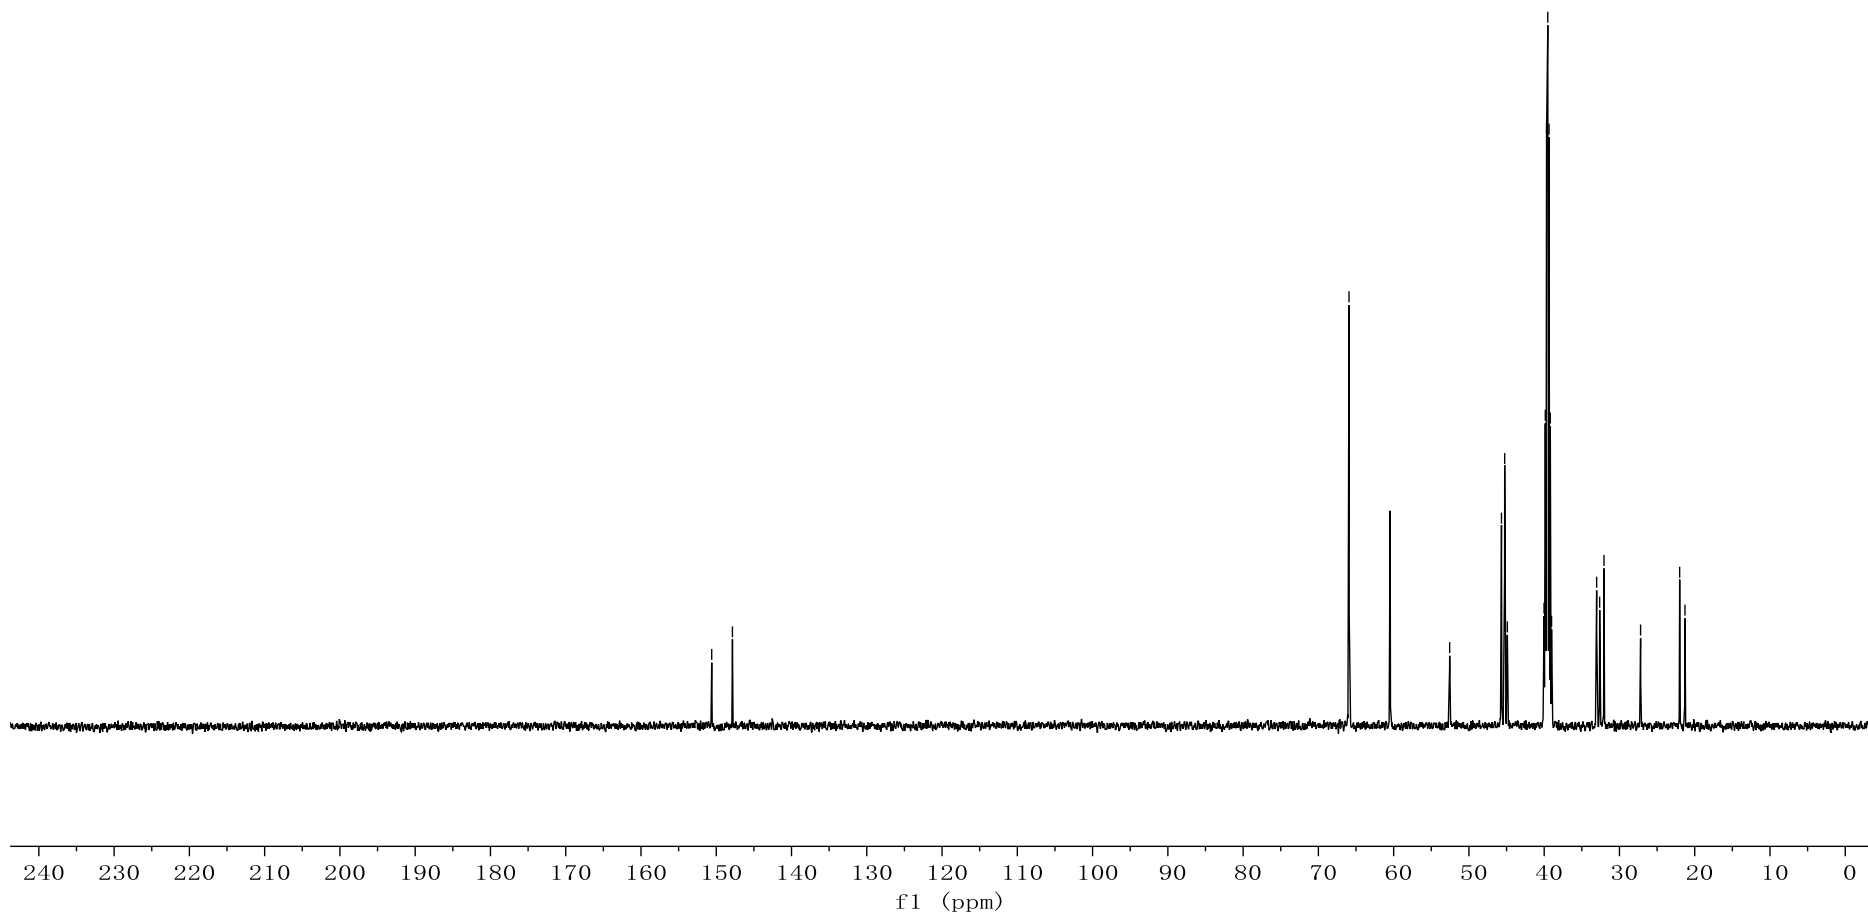

<sup>1</sup>H NMR (500 MHz, CDCl<sub>3</sub>) for 29

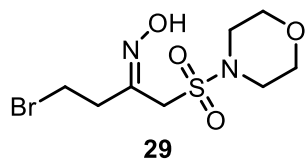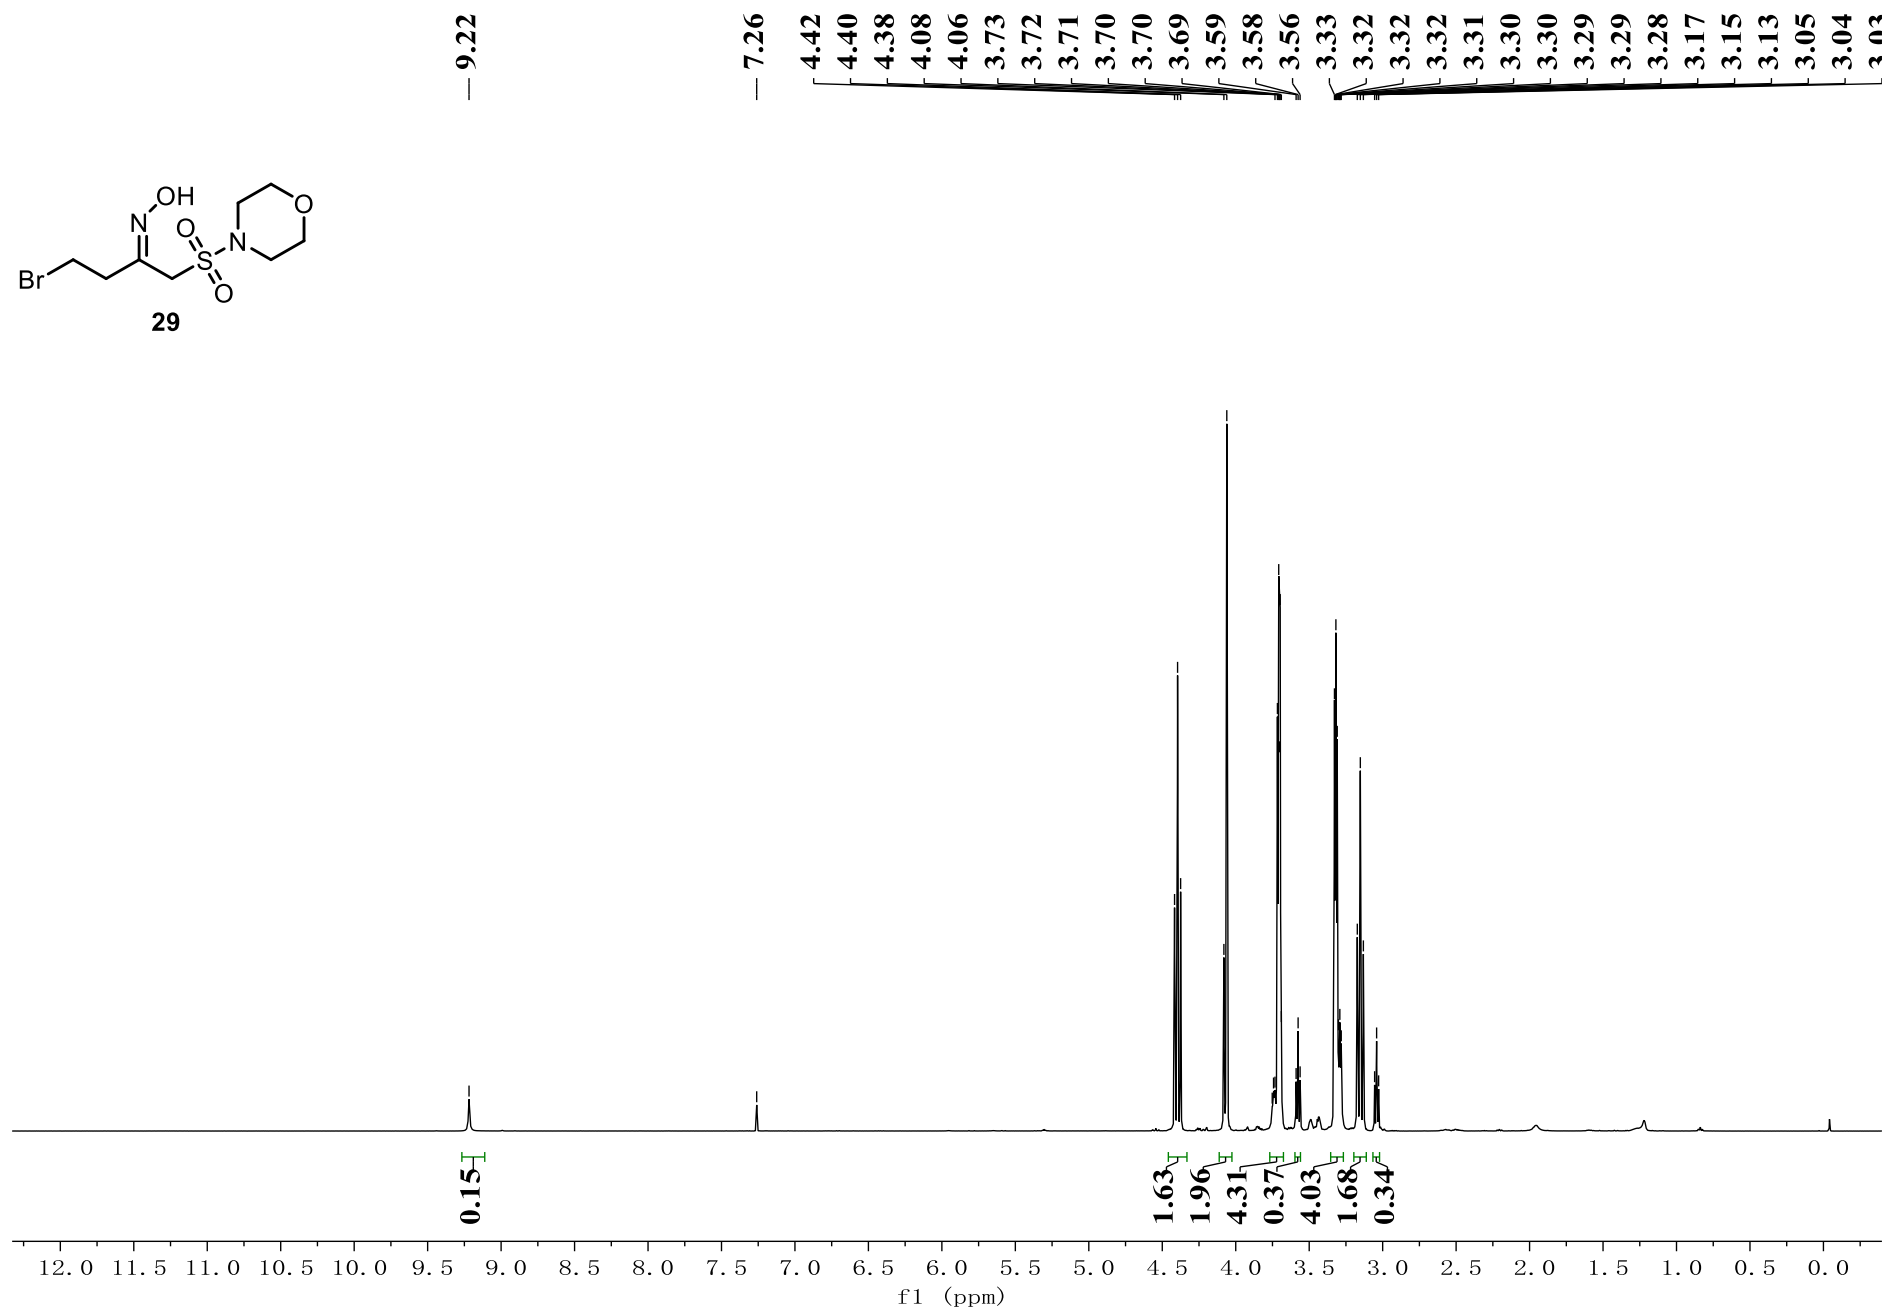



<sup>13</sup>C NMR (125 MHz, CDCl<sub>3</sub>) for 29

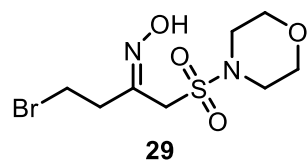

~ 150.13  
~ 147.55

77.42  
77.16  
76.91  
69.87  
66.63  
66.53  
48.20  
46.06  
45.92  
45.54  
36.67  
36.52  
28.10

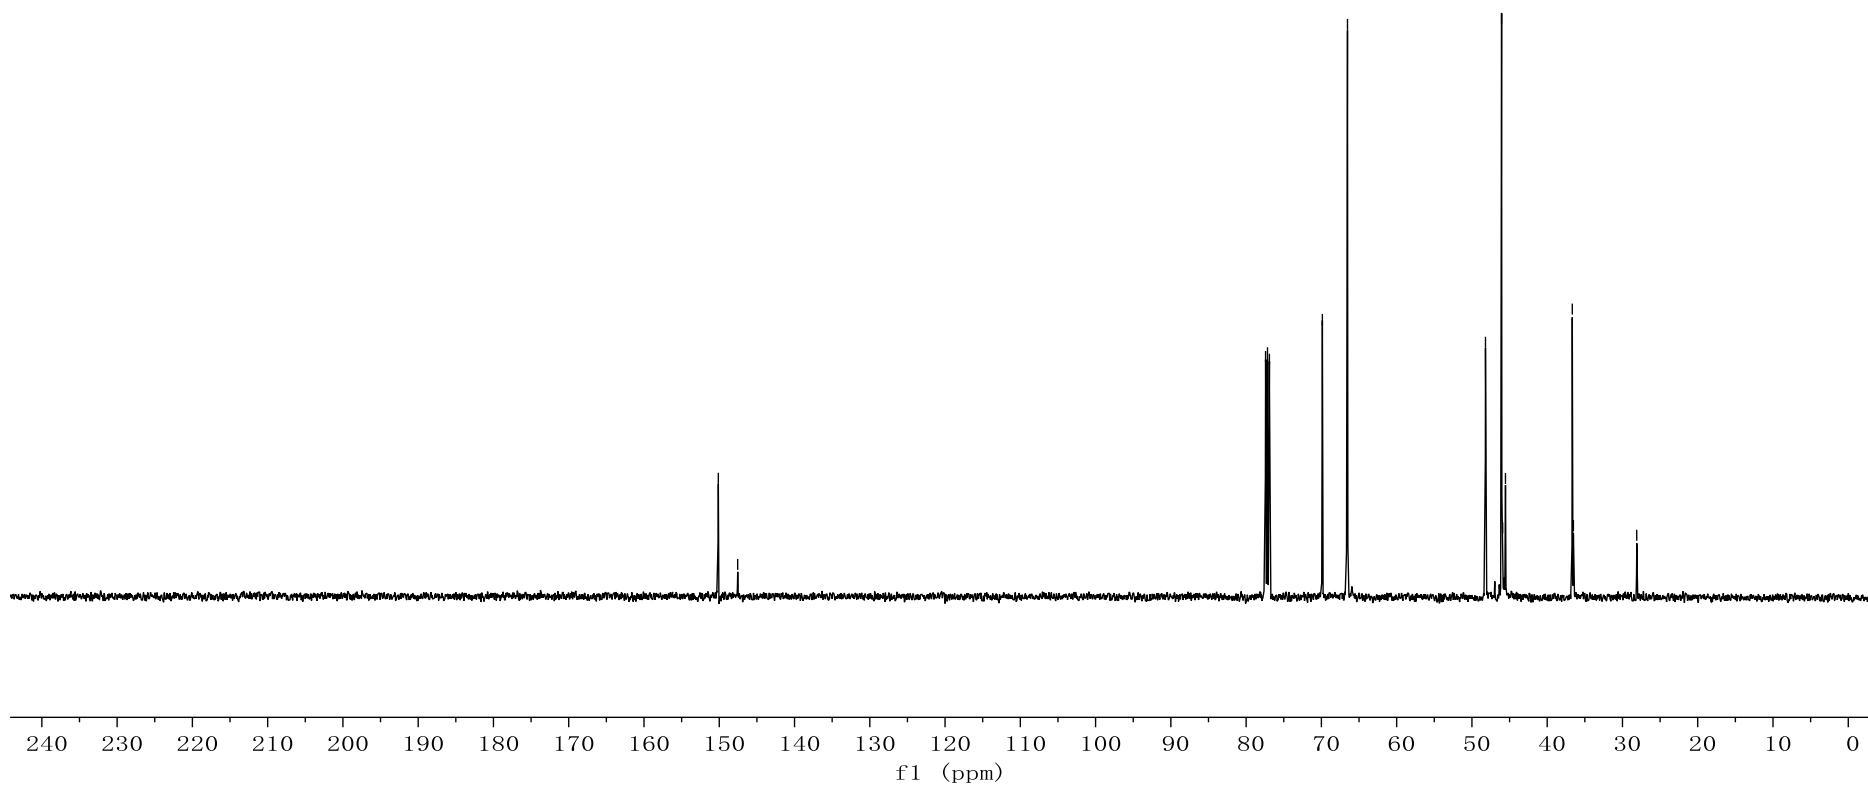

<sup>1</sup>H NMR (500 MHz, DMSO-d<sub>6</sub>) for 30

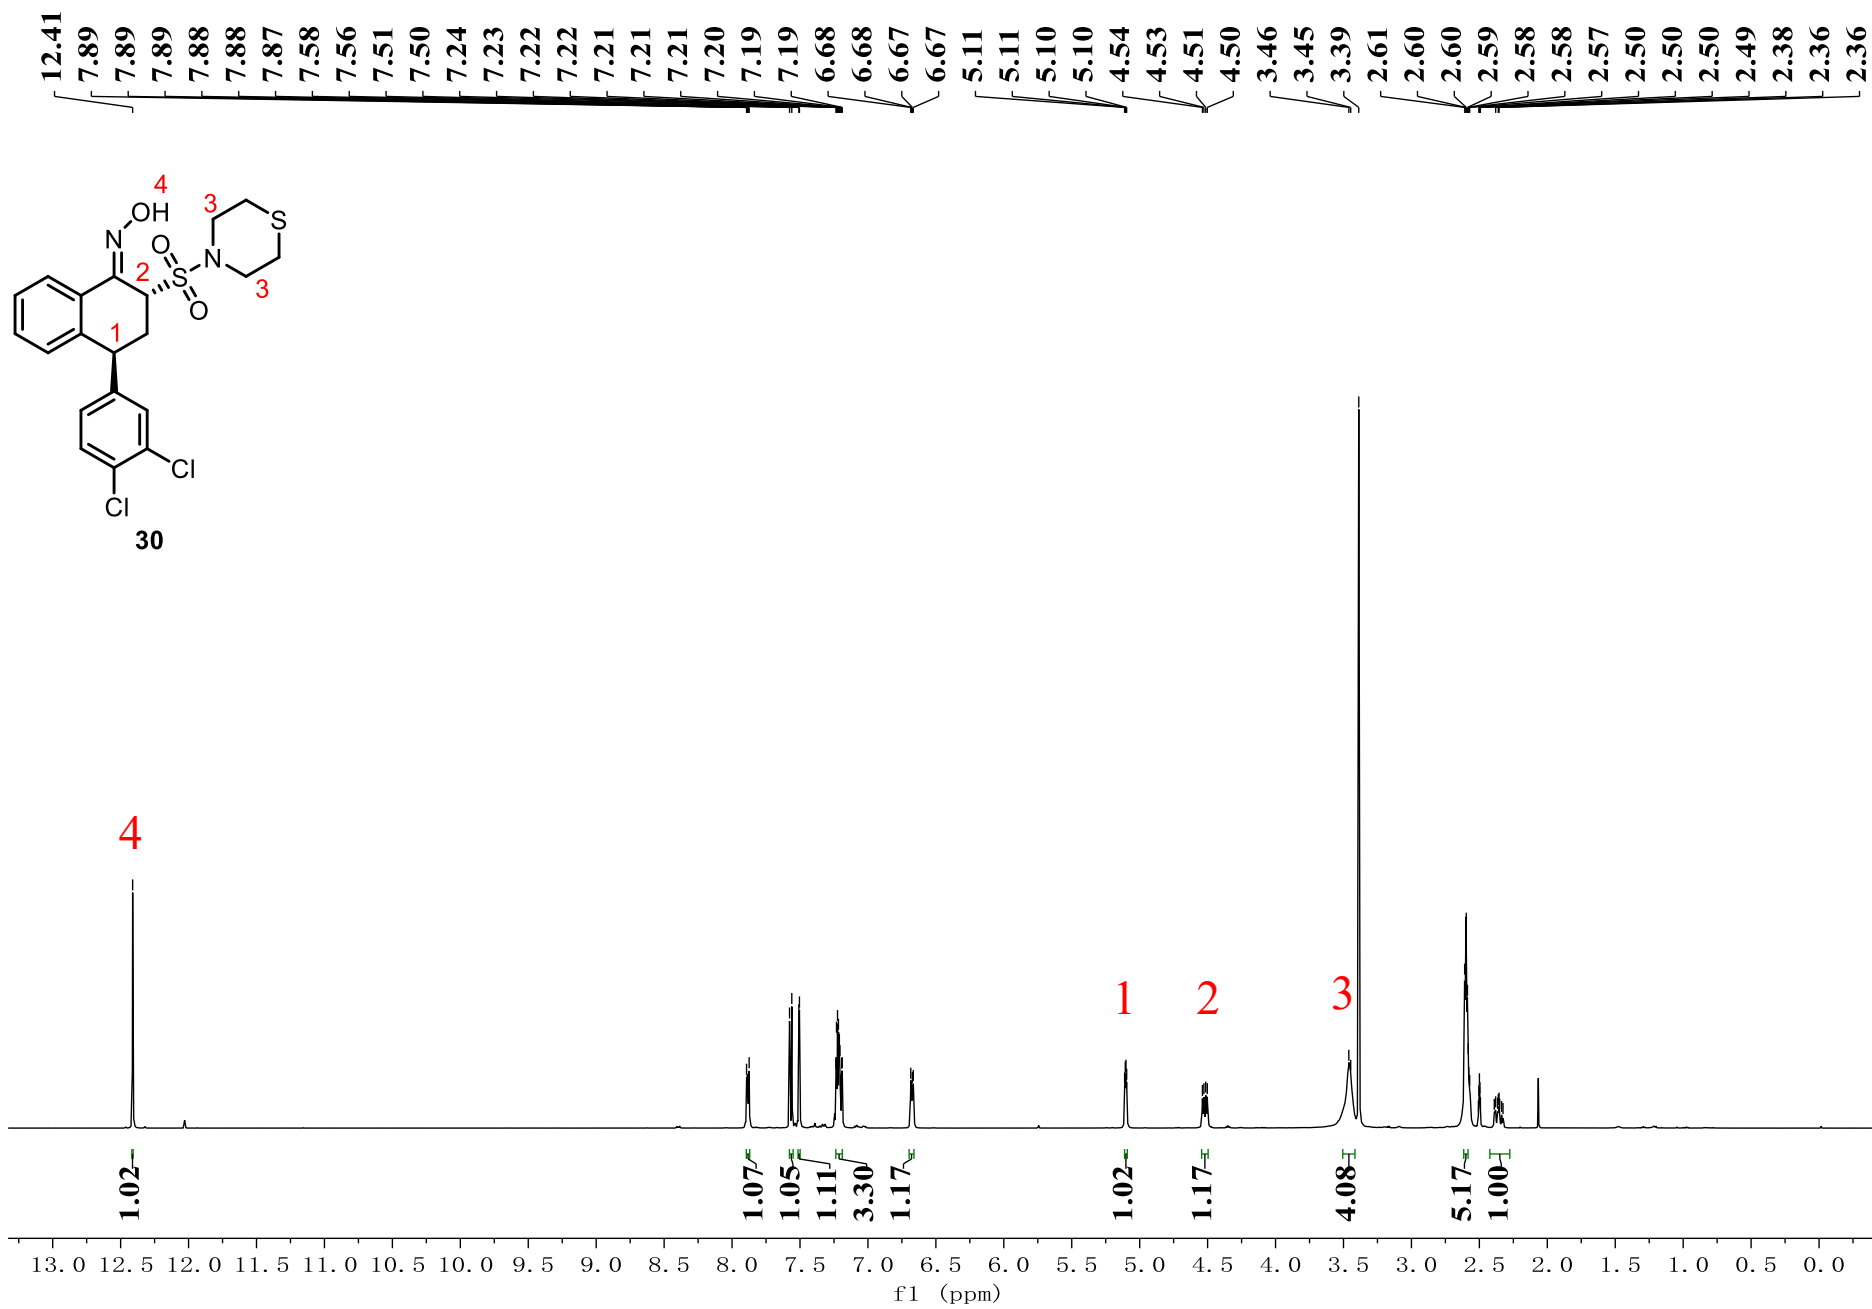

NOESY of 30

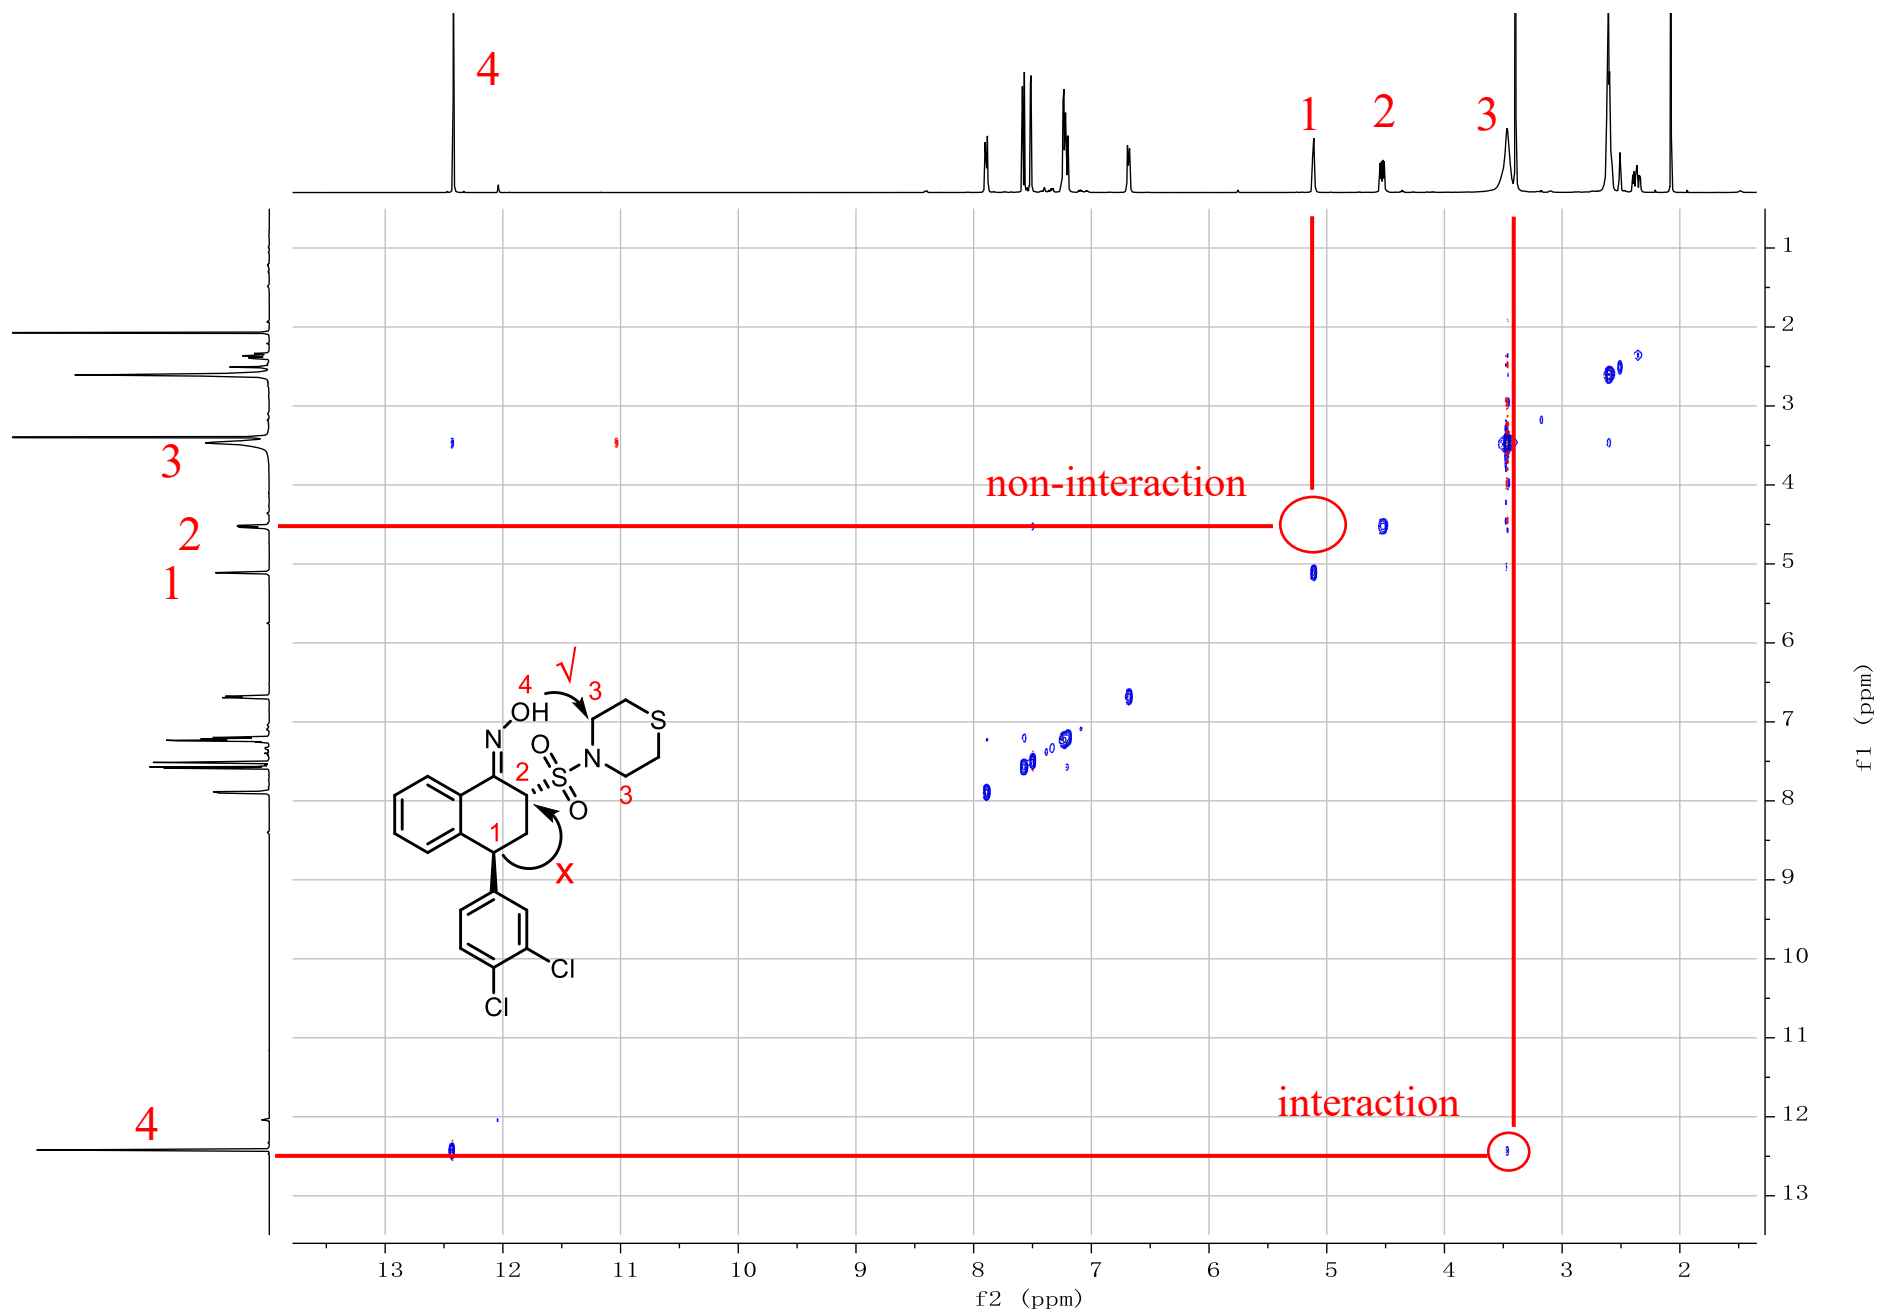

<sup>13</sup>C NMR (125 MHz, DMSO-*d*<sub>6</sub>) for 30

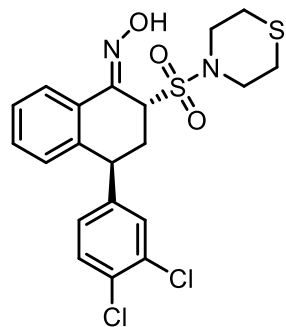

30

146.18  
146.04  
139.38  
131.34  
130.85  
130.09  
129.53  
129.31  
129.16  
126.71  
123.81

51.74  
47.13  
40.76  
40.02  
39.85  
39.69  
39.52  
39.35  
39.19  
39.02  
32.48  
27.19

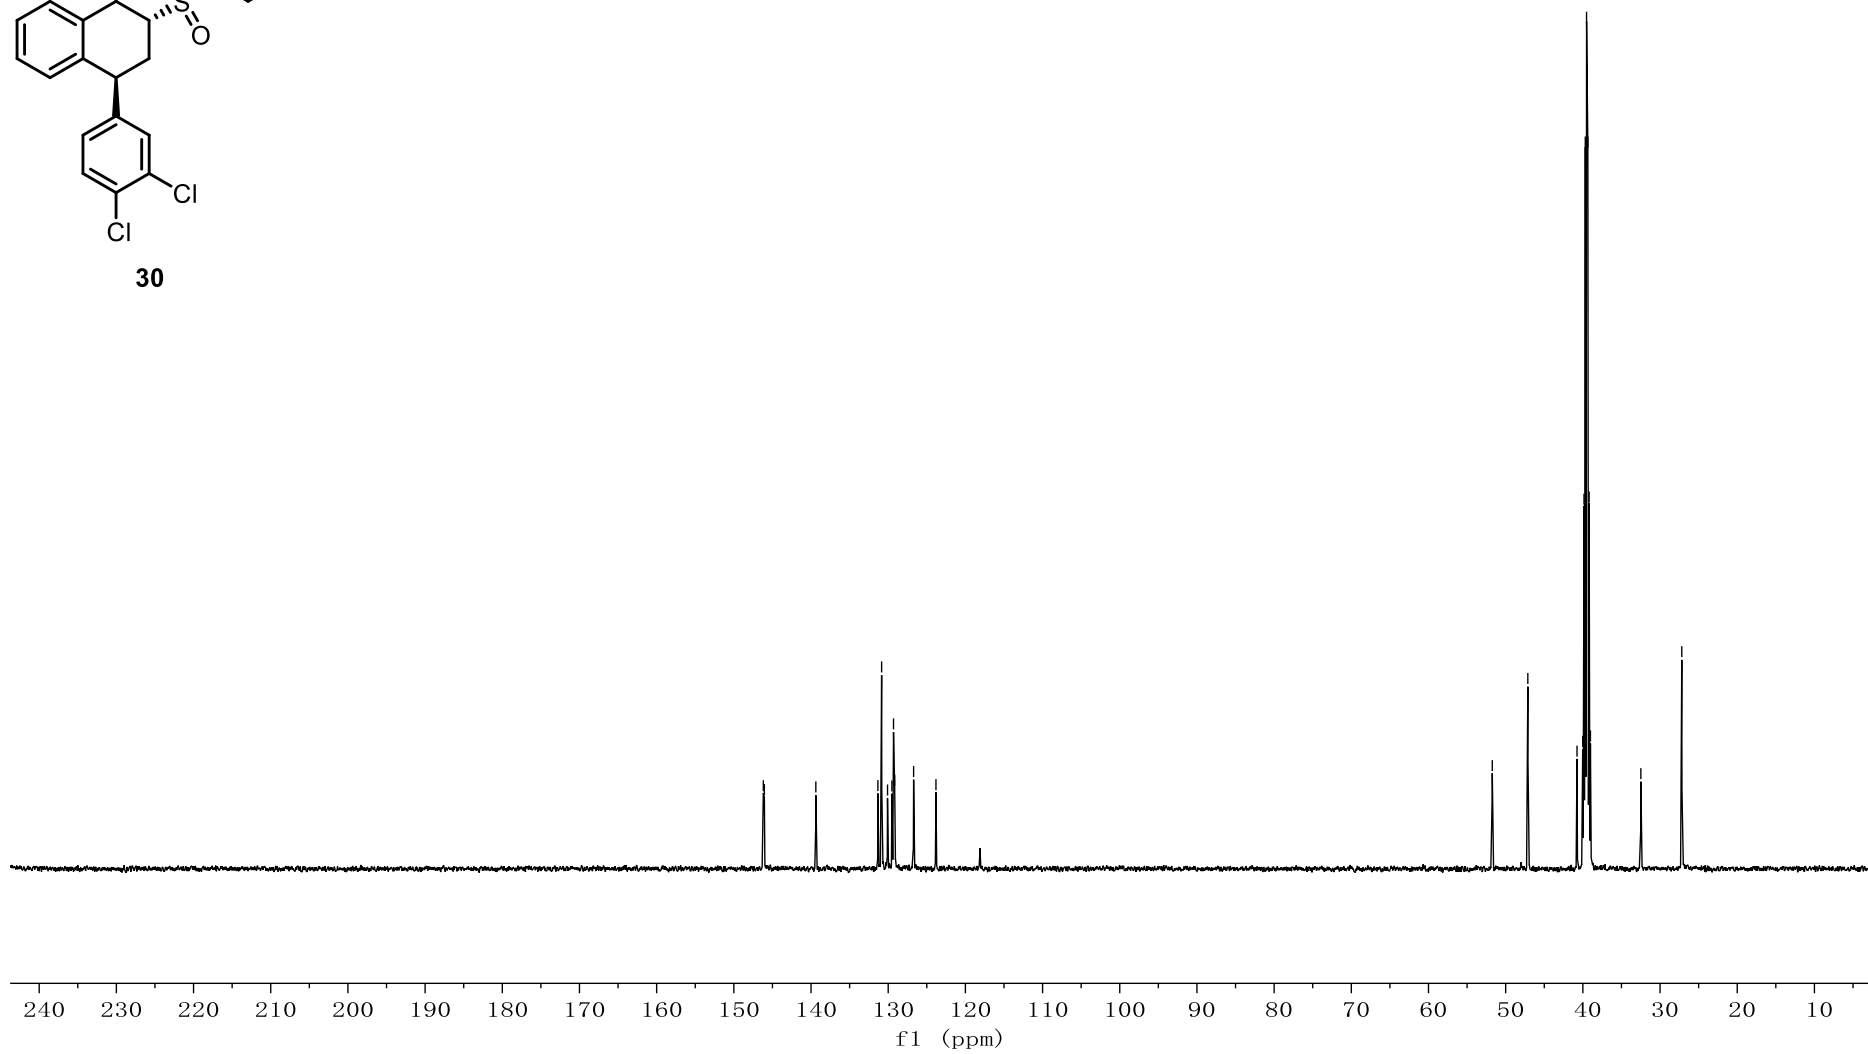

<sup>1</sup>H NMR (500 MHz, DMSO-d<sub>6</sub>) for 31

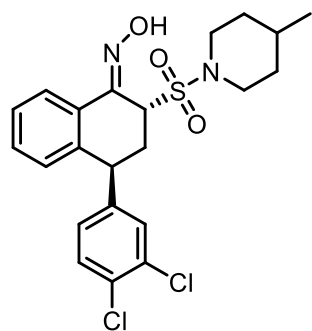

31

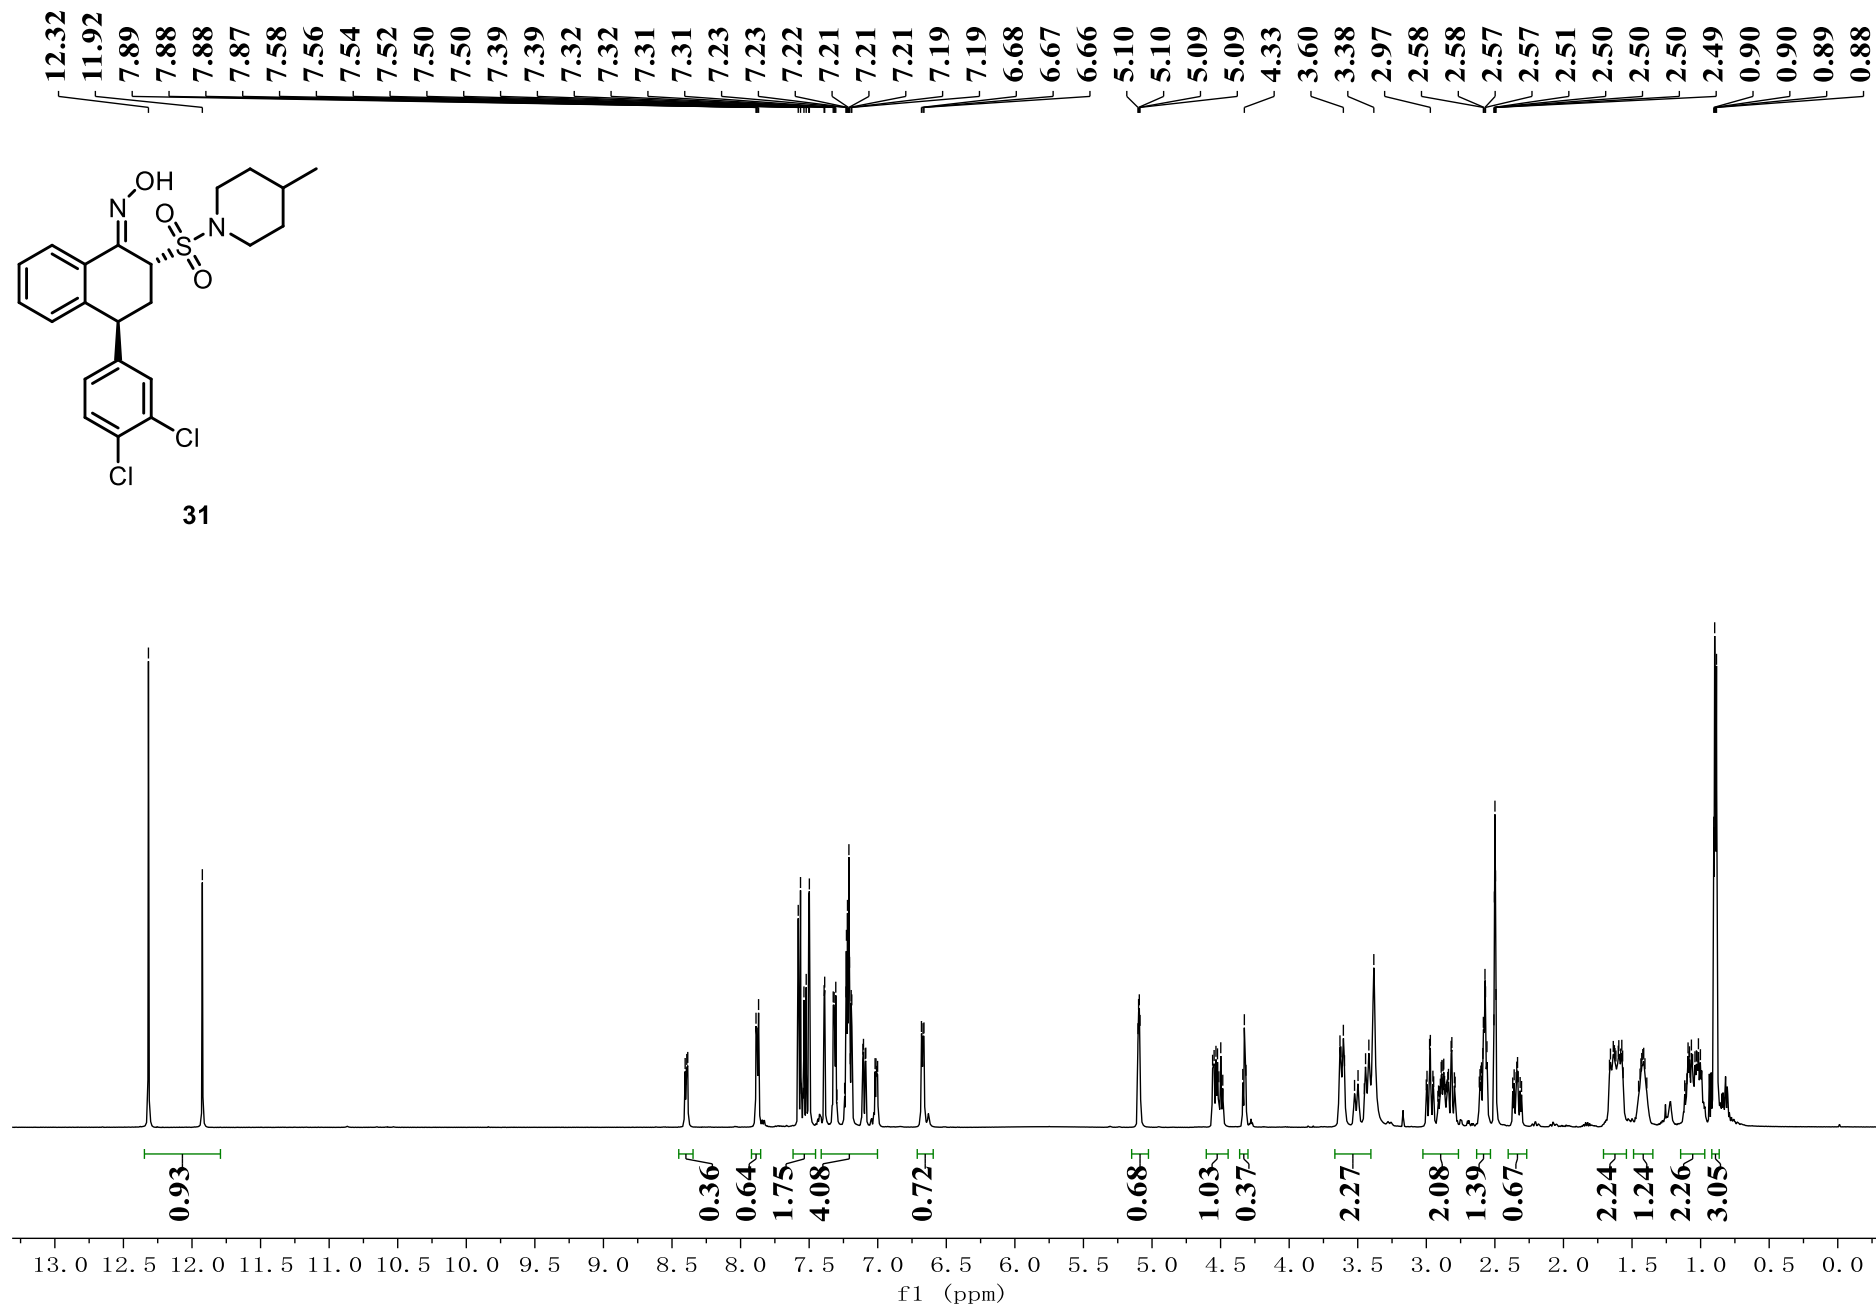

<sup>13</sup>C NMR (125 MHz, DMSO-*d*<sub>6</sub>) for 31

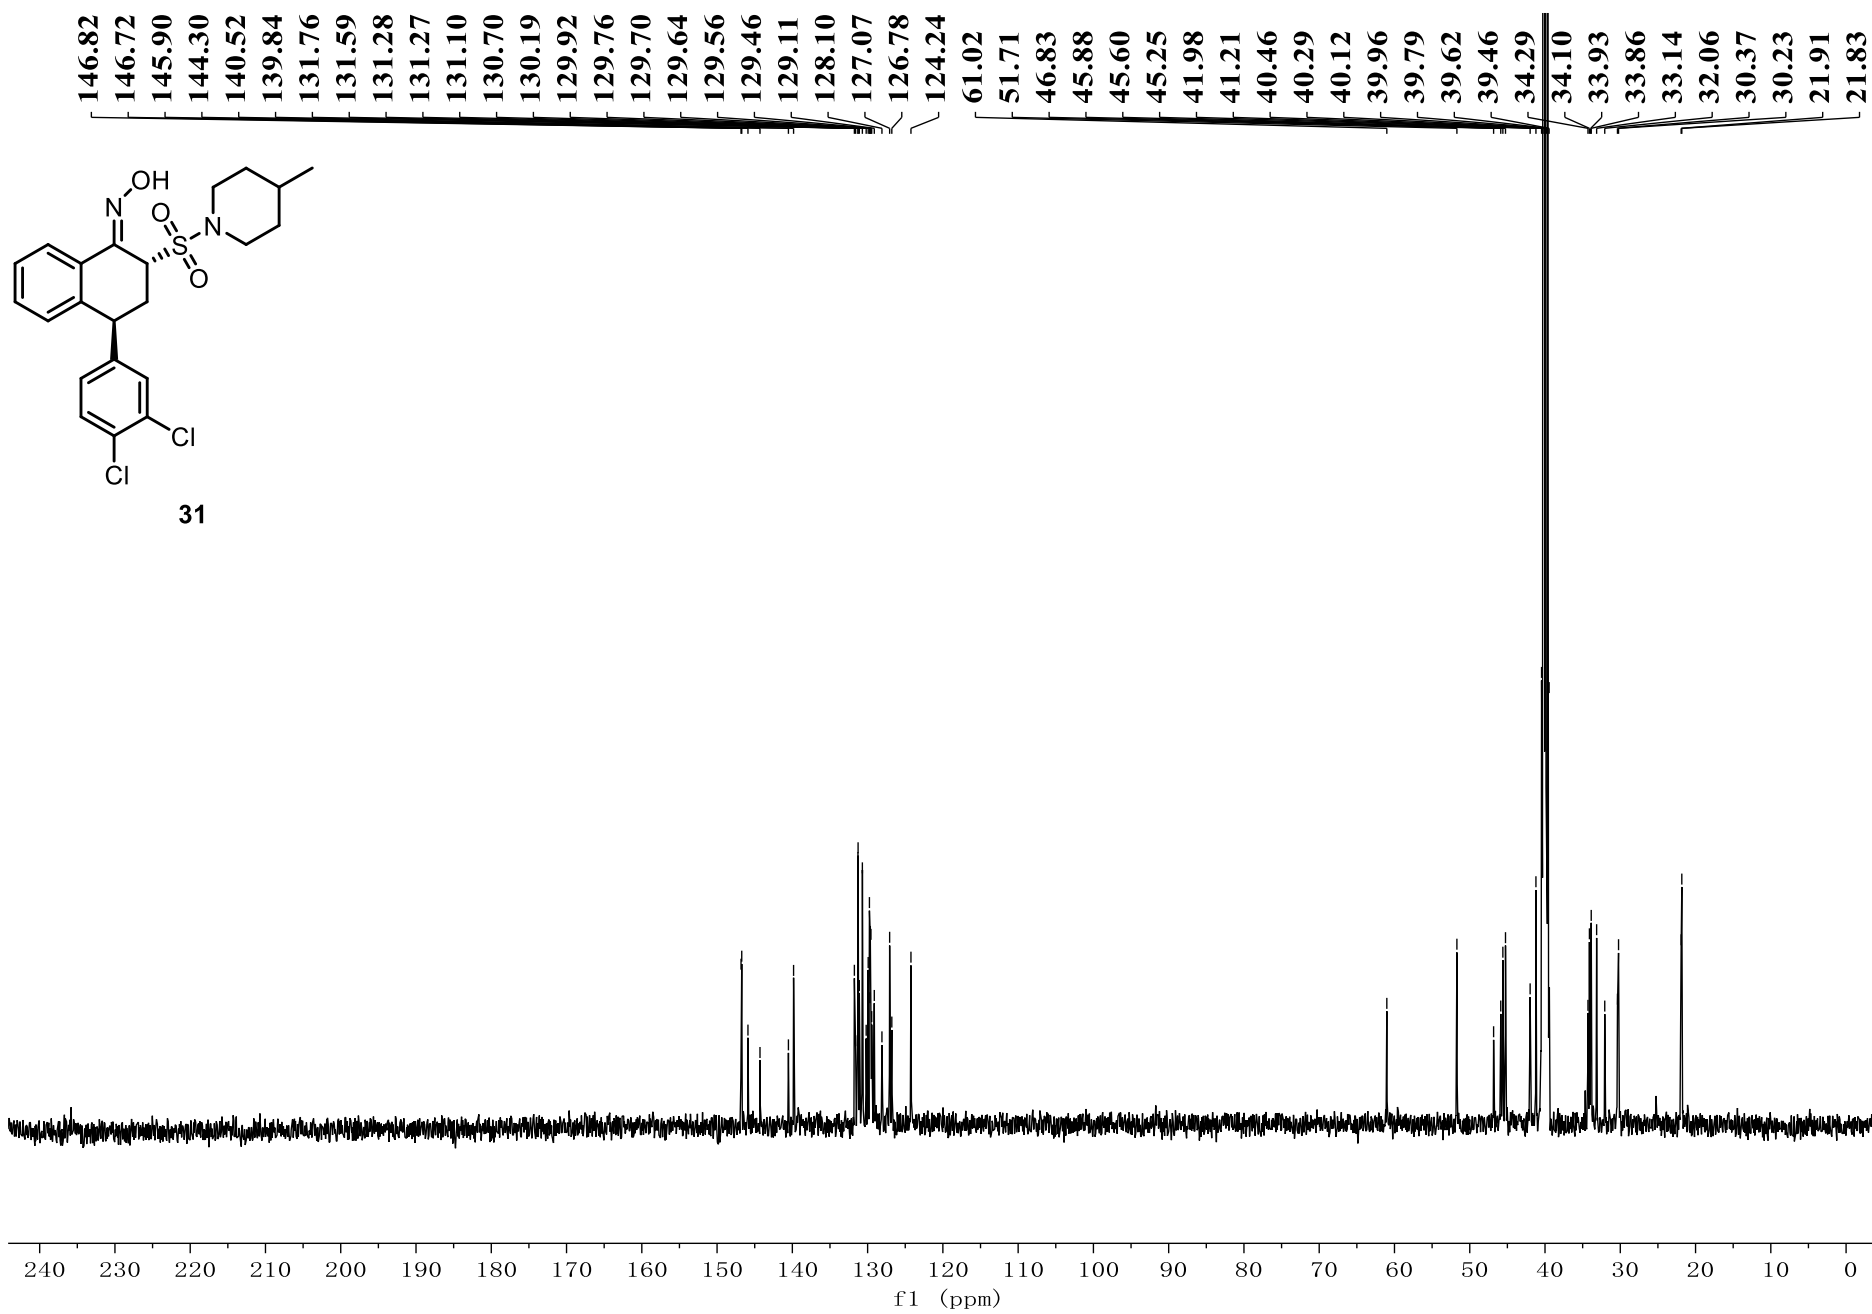

<sup>1</sup>H NMR (500 MHz, DMSO-*d*<sub>6</sub>) for 32

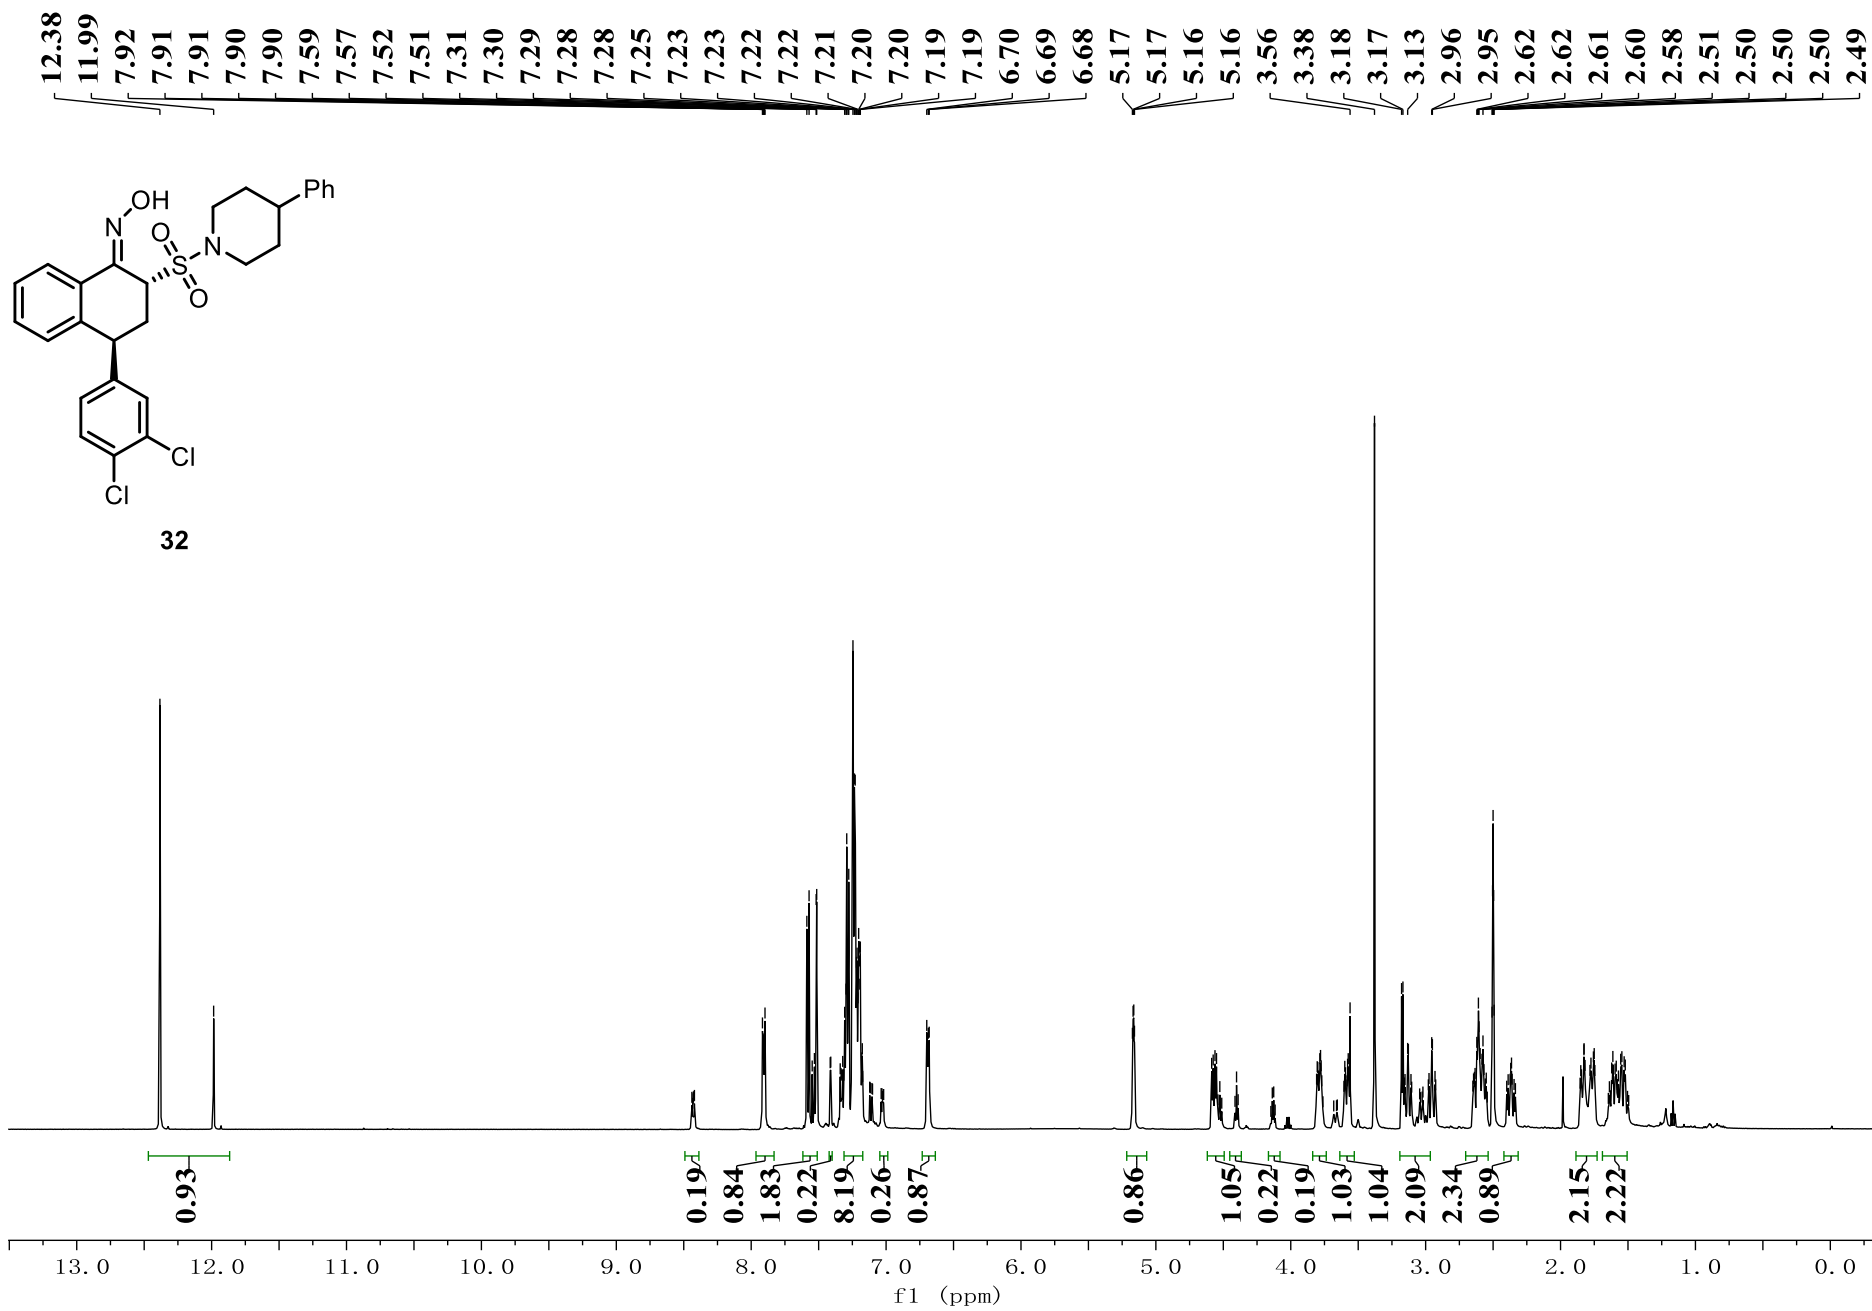





<sup>1</sup>H NMR (500 MHz, DMSO-d<sub>6</sub>) for 33

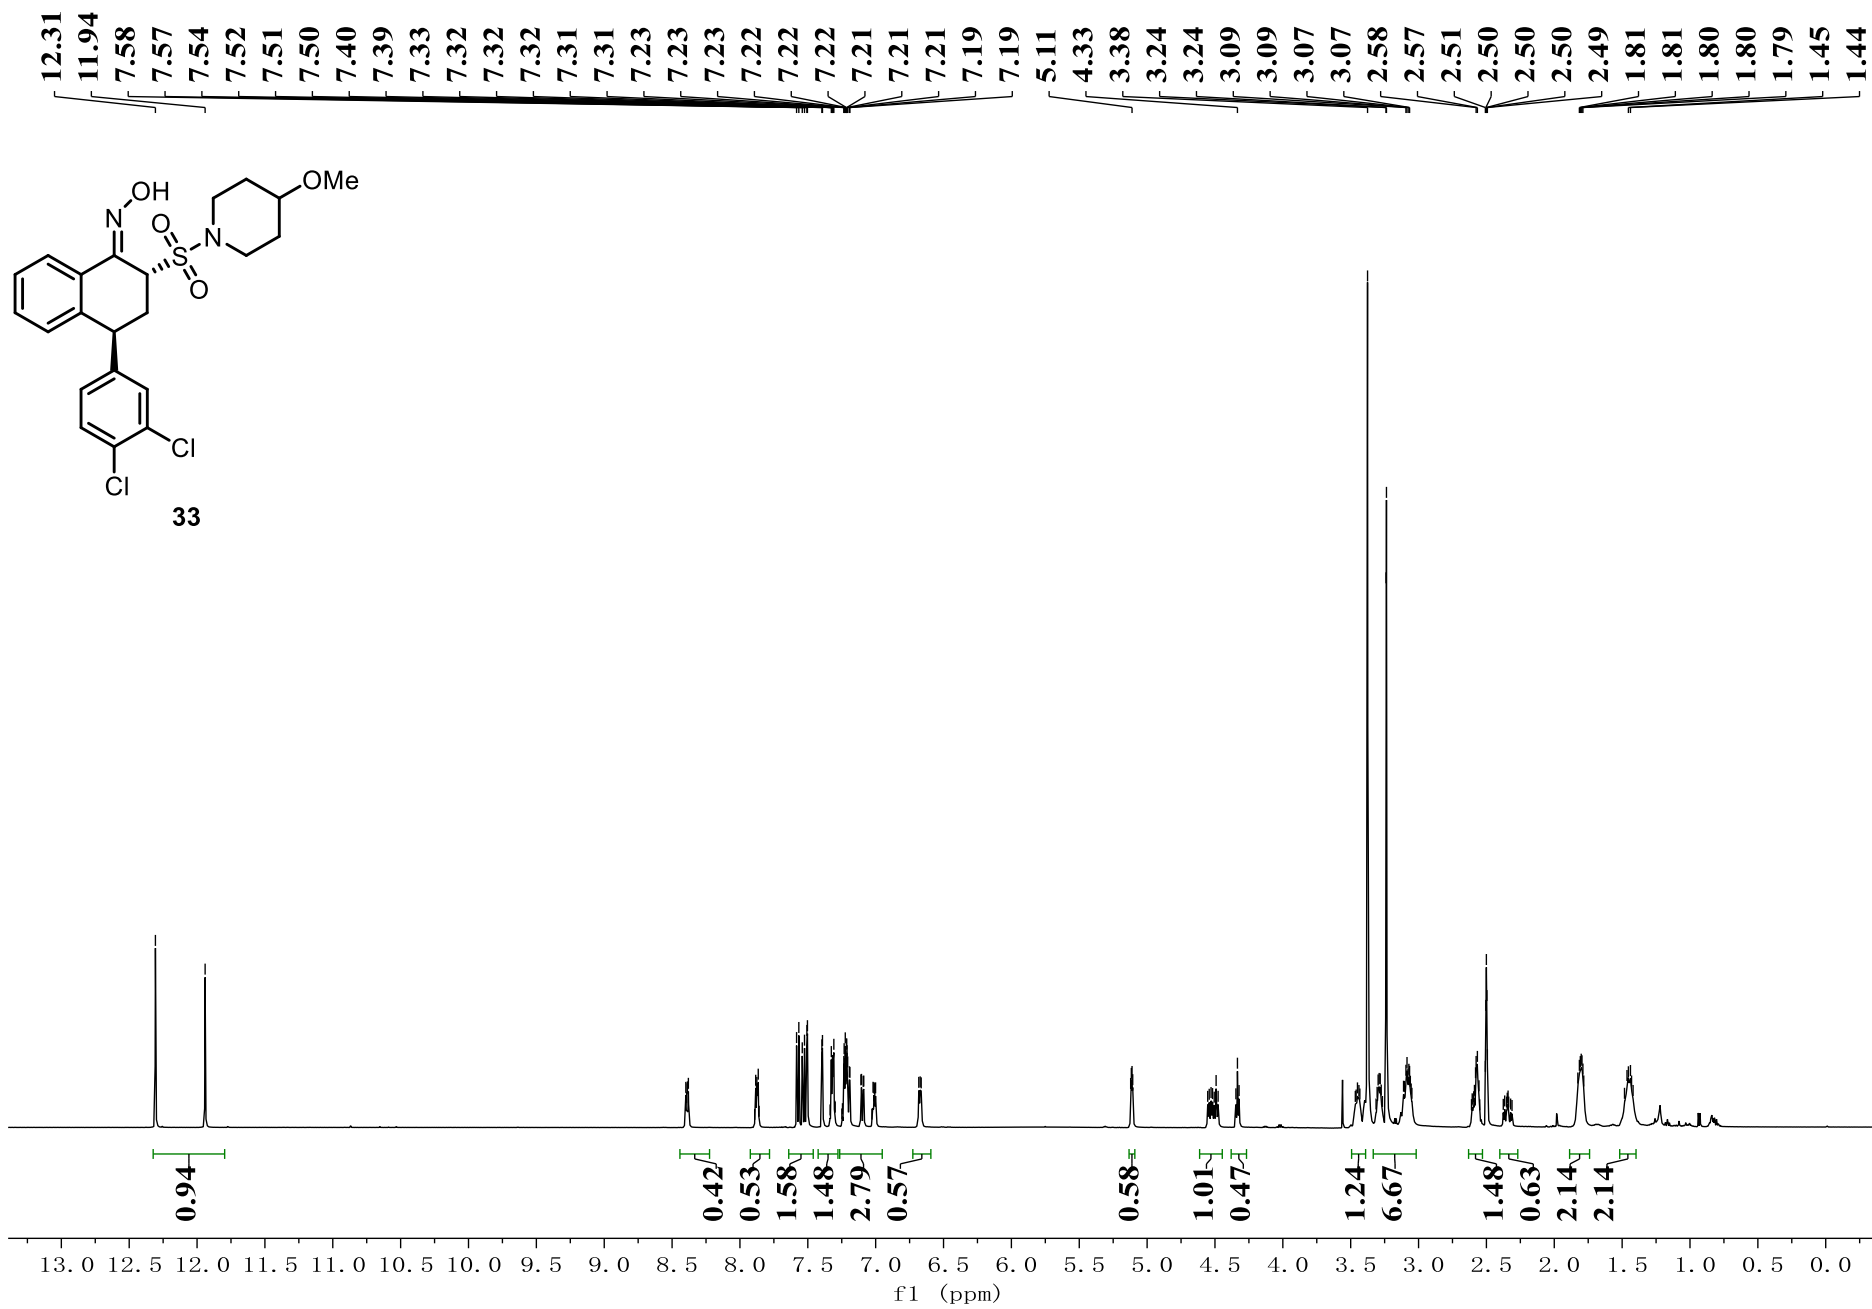



<sup>1</sup>H NMR (500 MHz, DMSO-d<sub>6</sub>) for 34

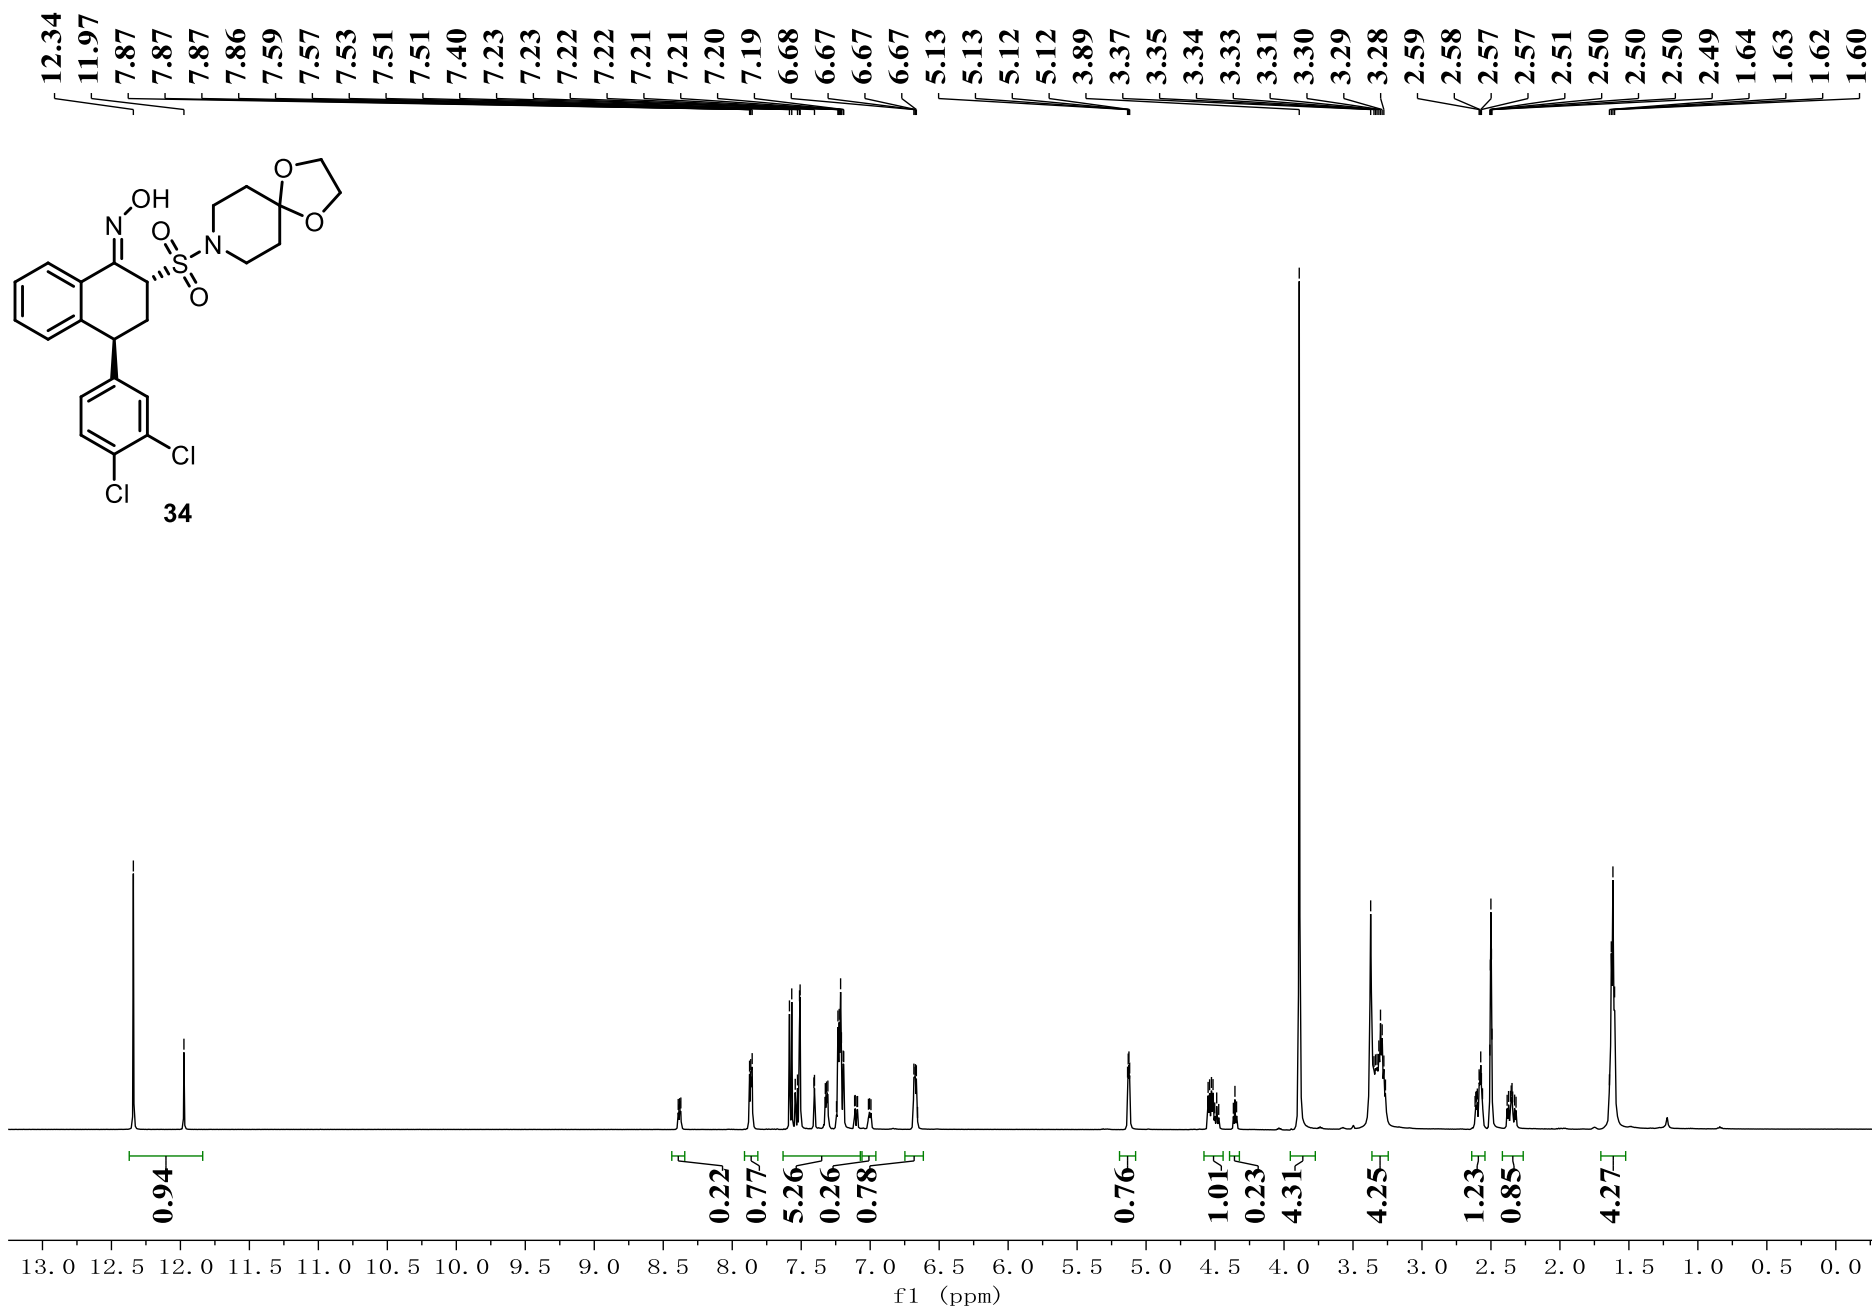

<sup>13</sup>C NMR (125 MHz, DMSO-*d*<sub>6</sub>) for 34

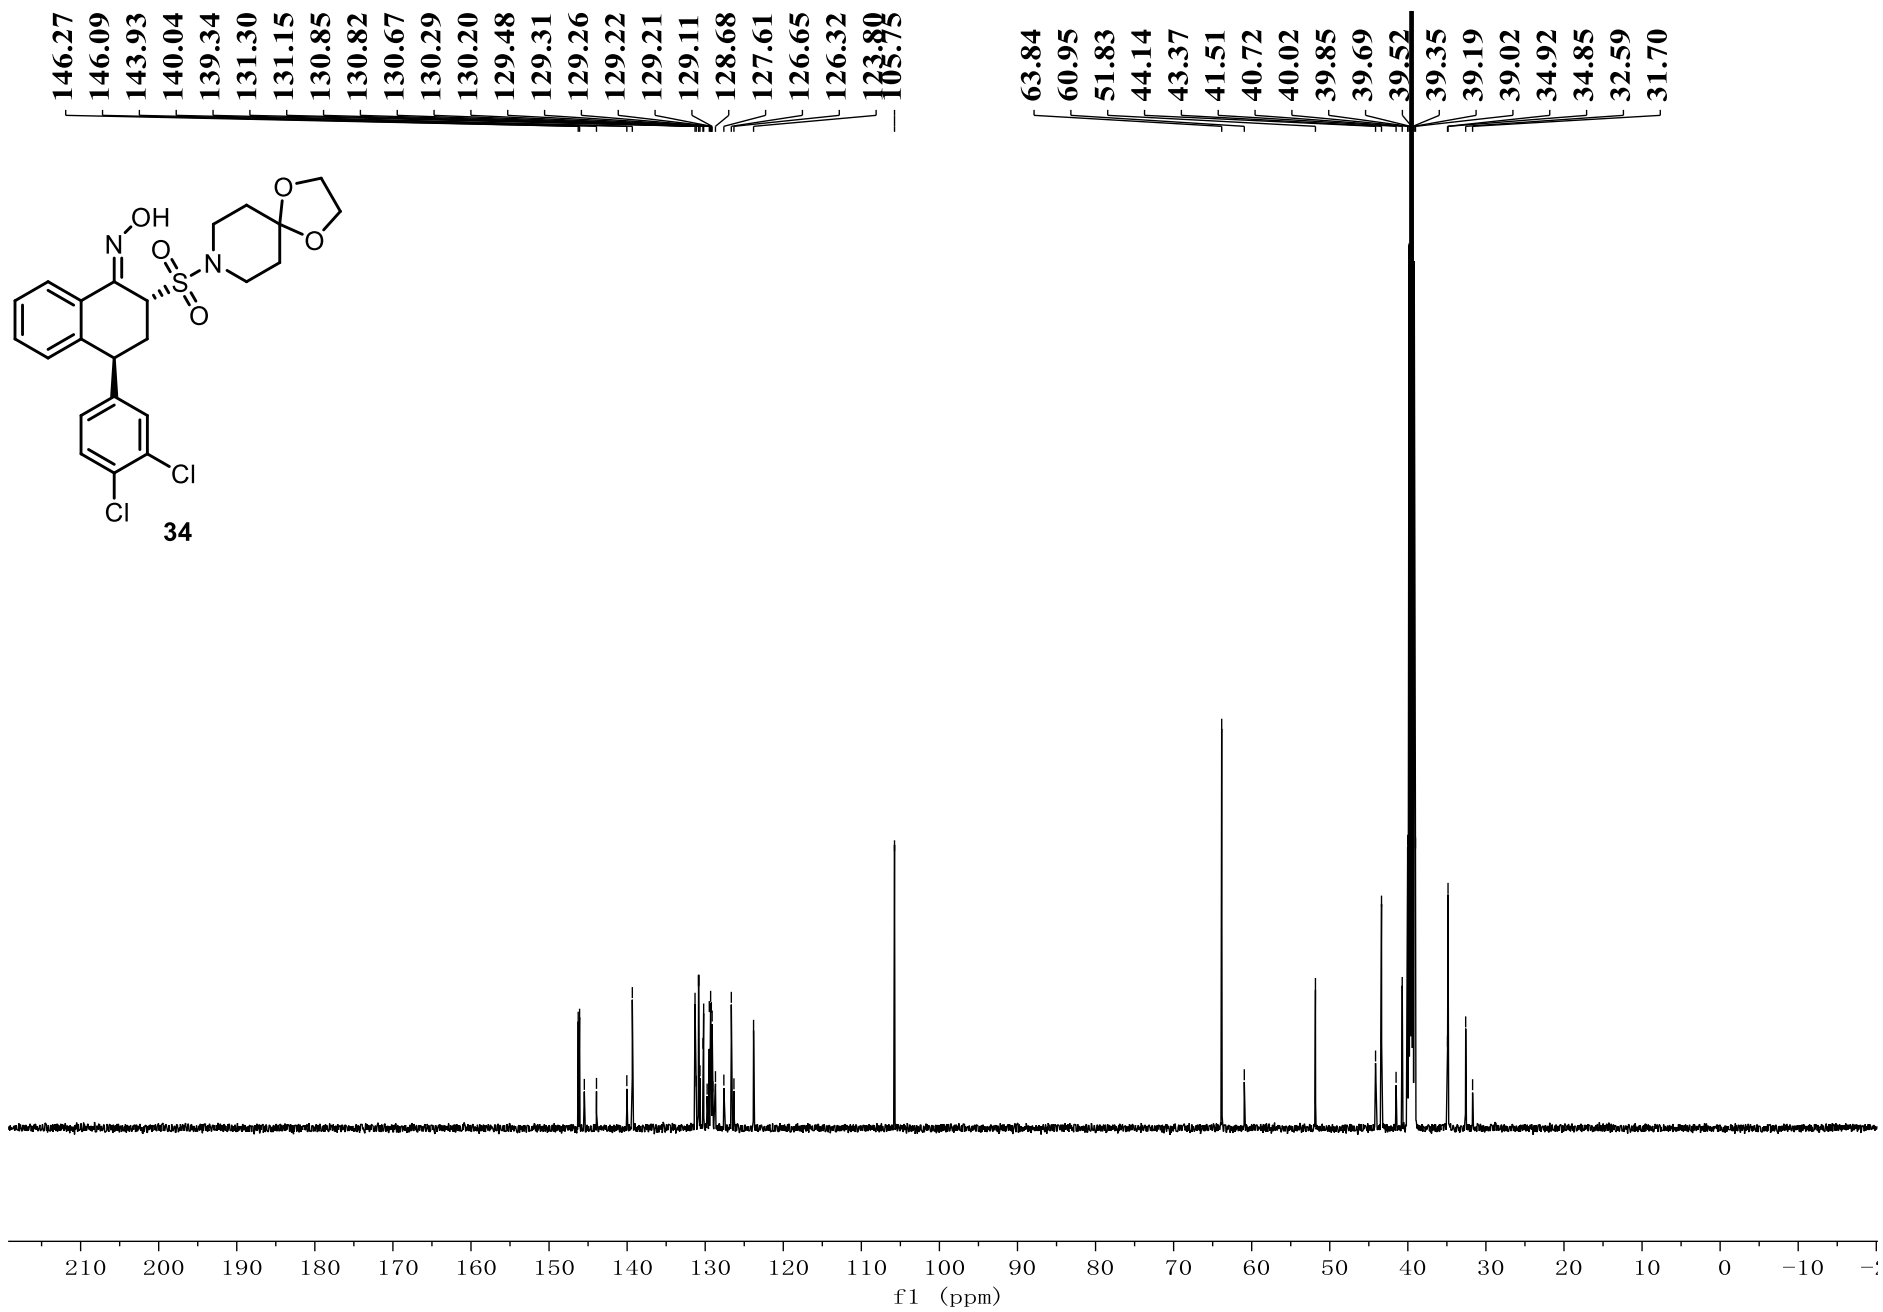

<sup>1</sup>H NMR (500 MHz, DMSO-d<sub>6</sub>) for 35

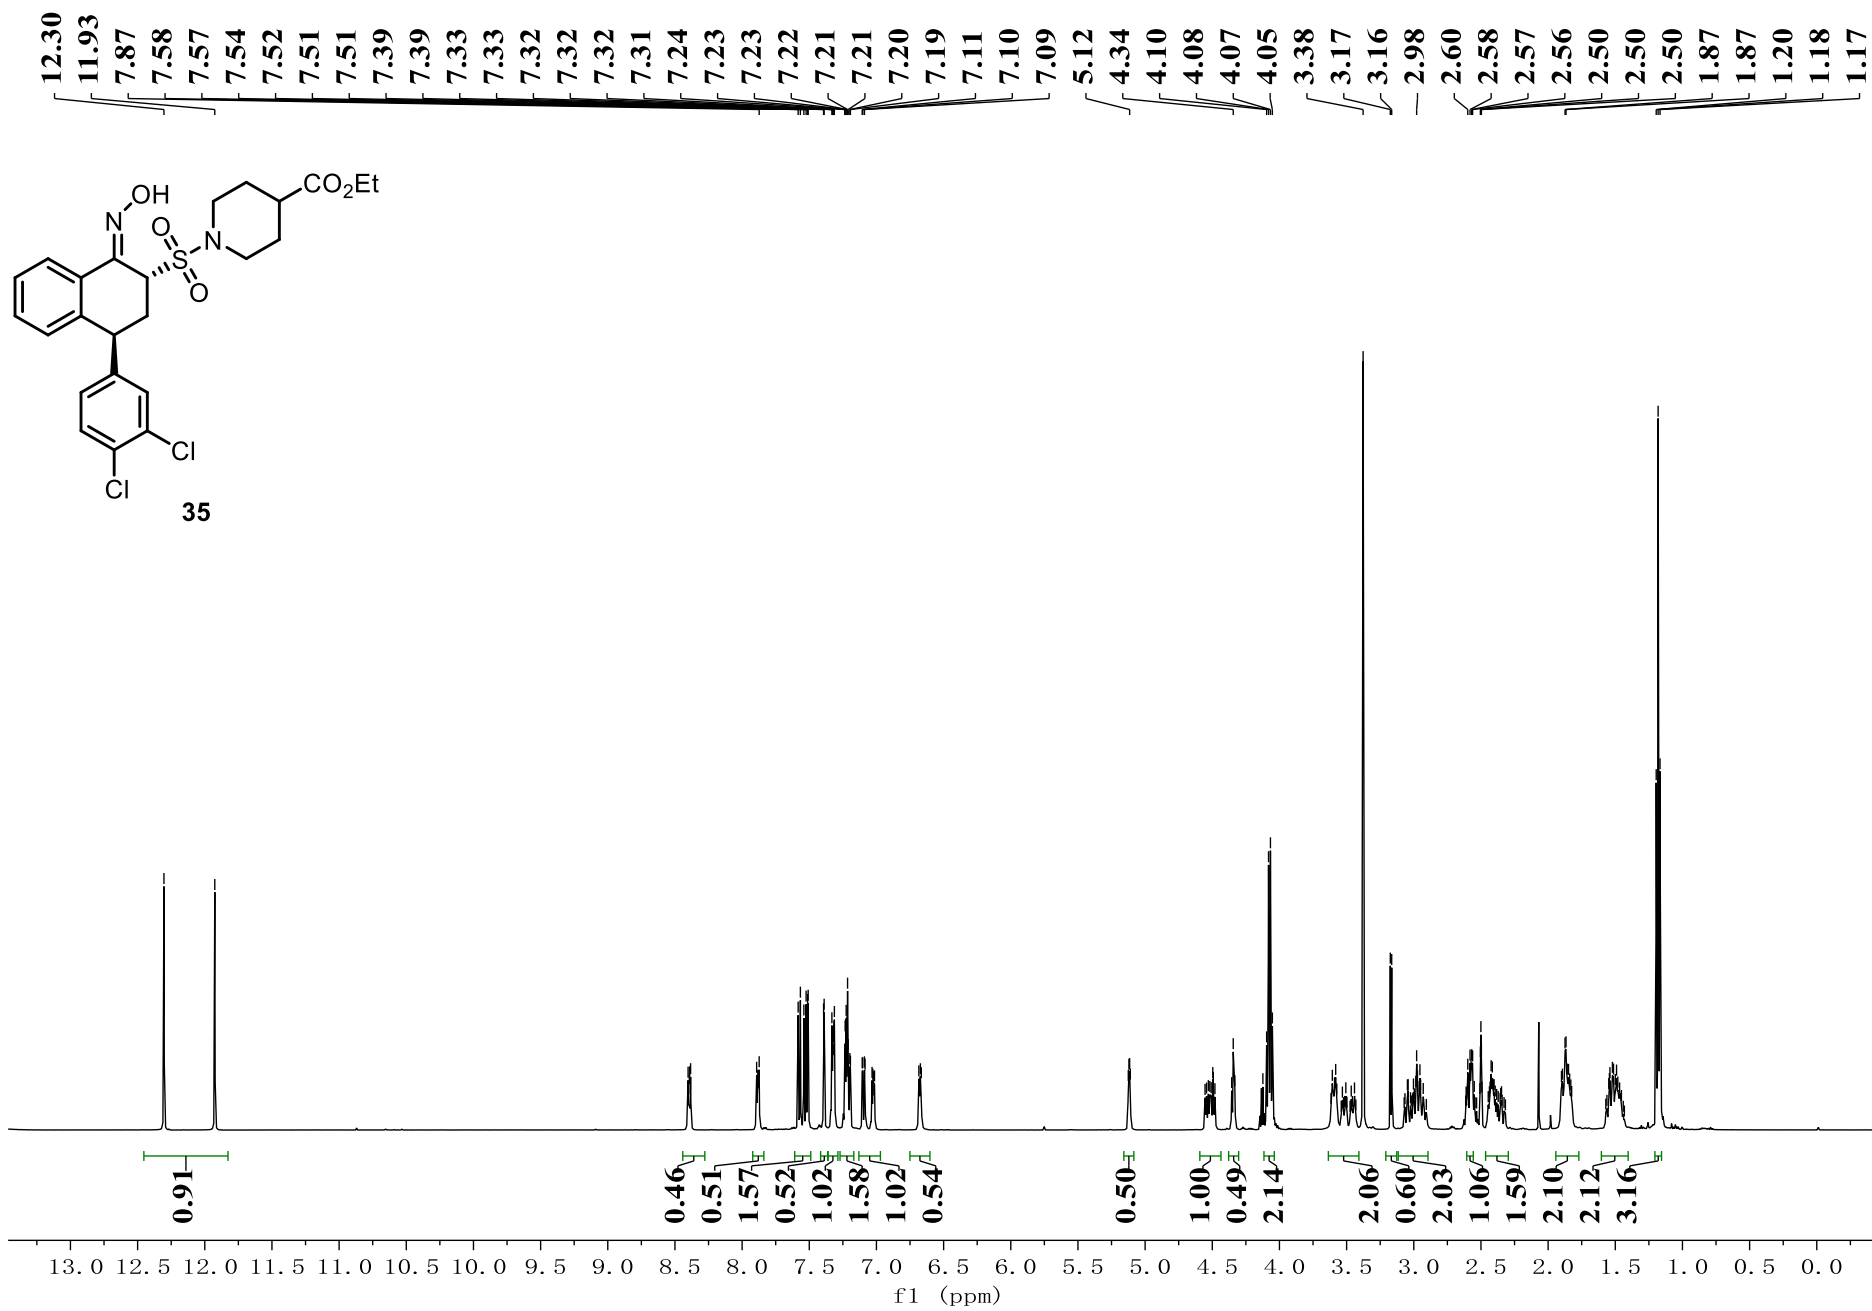

<sup>13</sup>C NMR (125 MHz, DMSO-*d*<sub>6</sub>) for 35

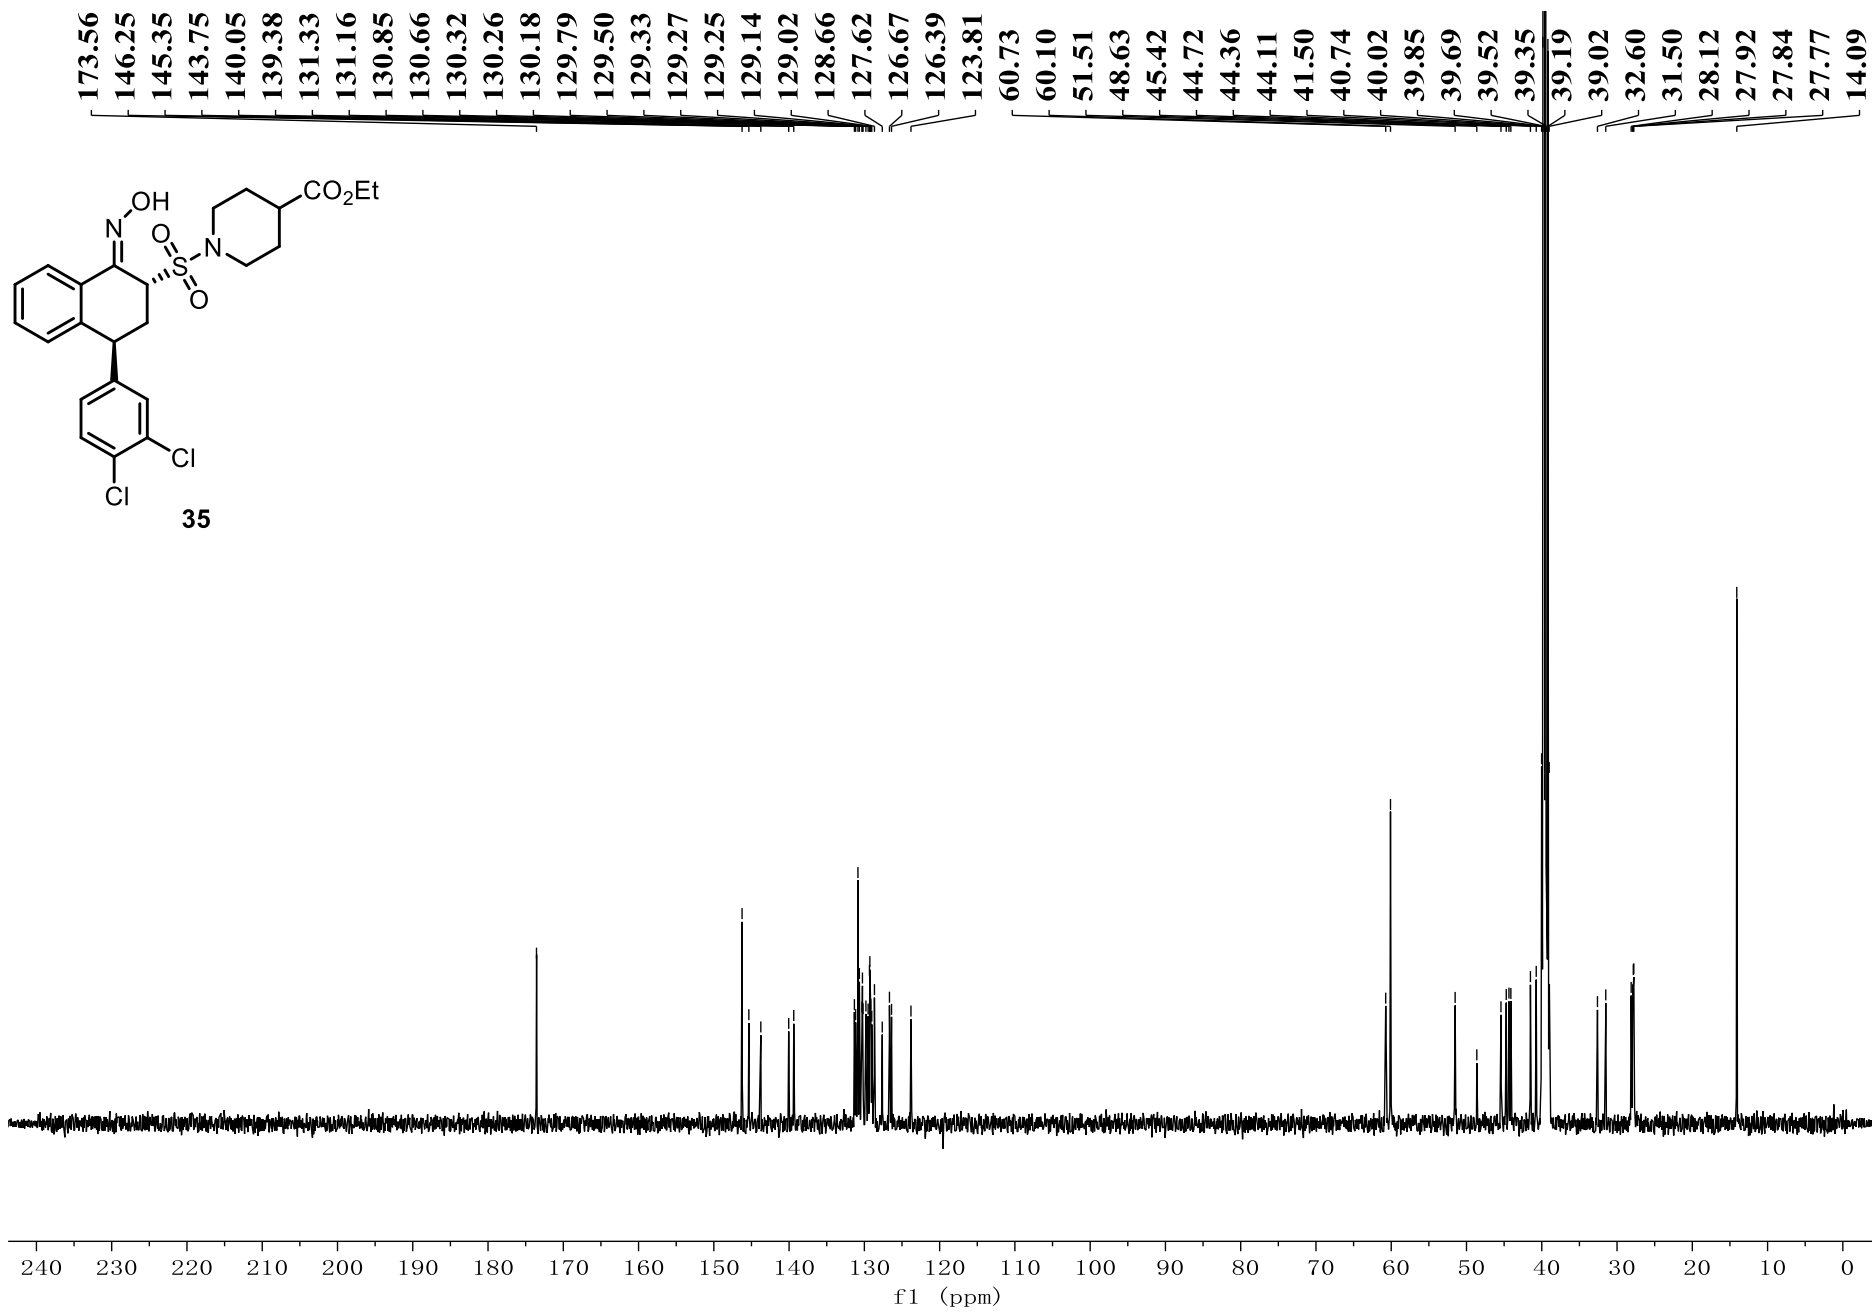

<sup>1</sup>H NMR (500 MHz, DMSO-d<sub>6</sub>) for 36

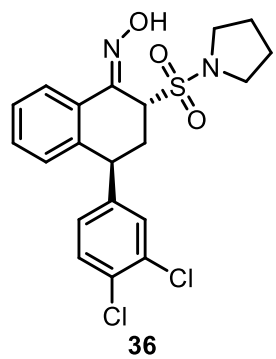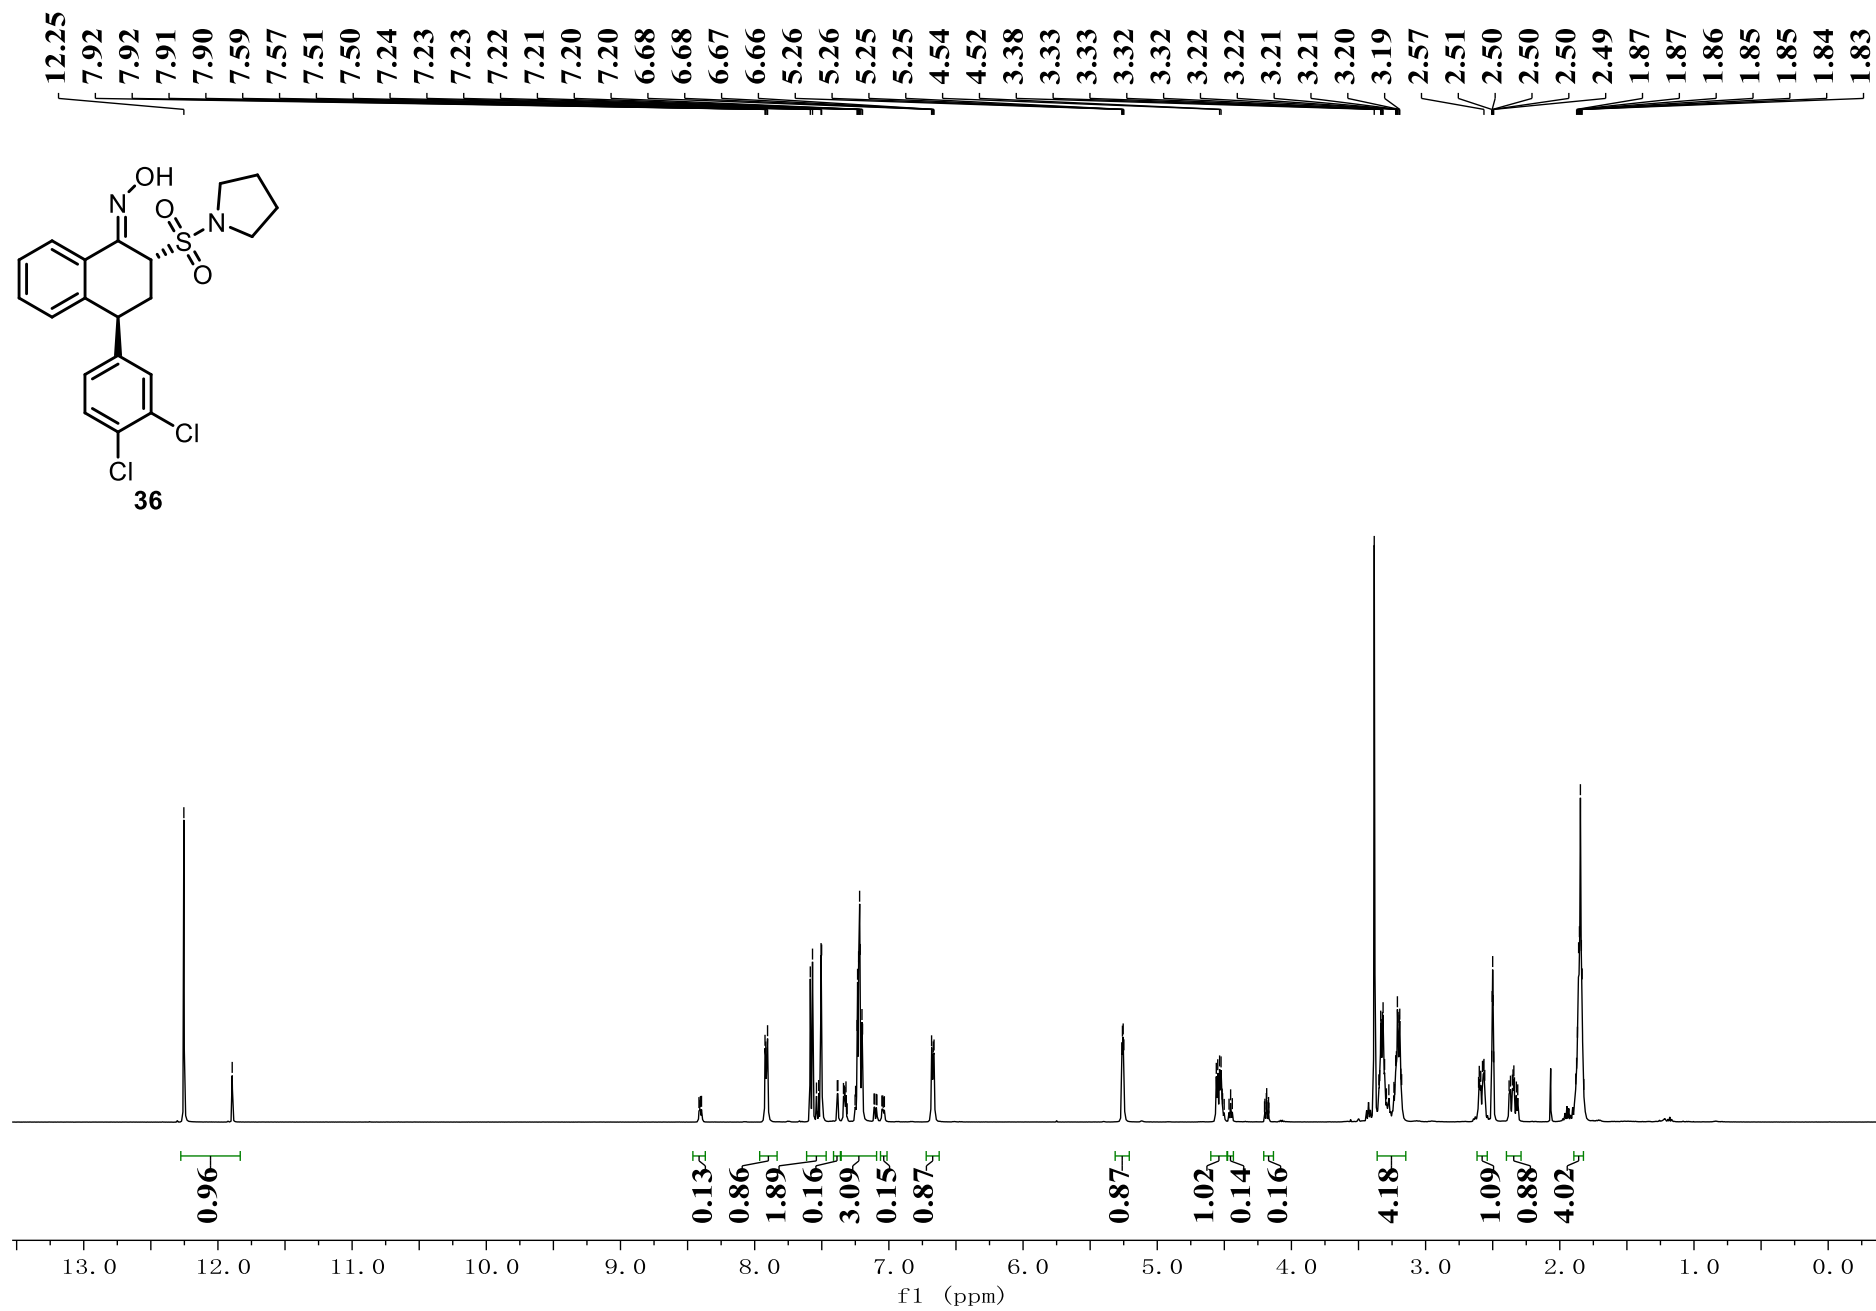

<sup>13</sup>C NMR (125 MHz, DMSO-*d*<sub>6</sub>) for 36

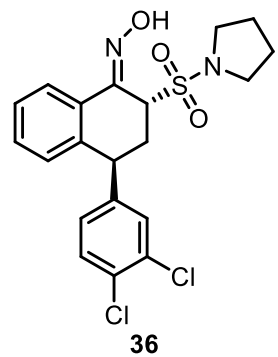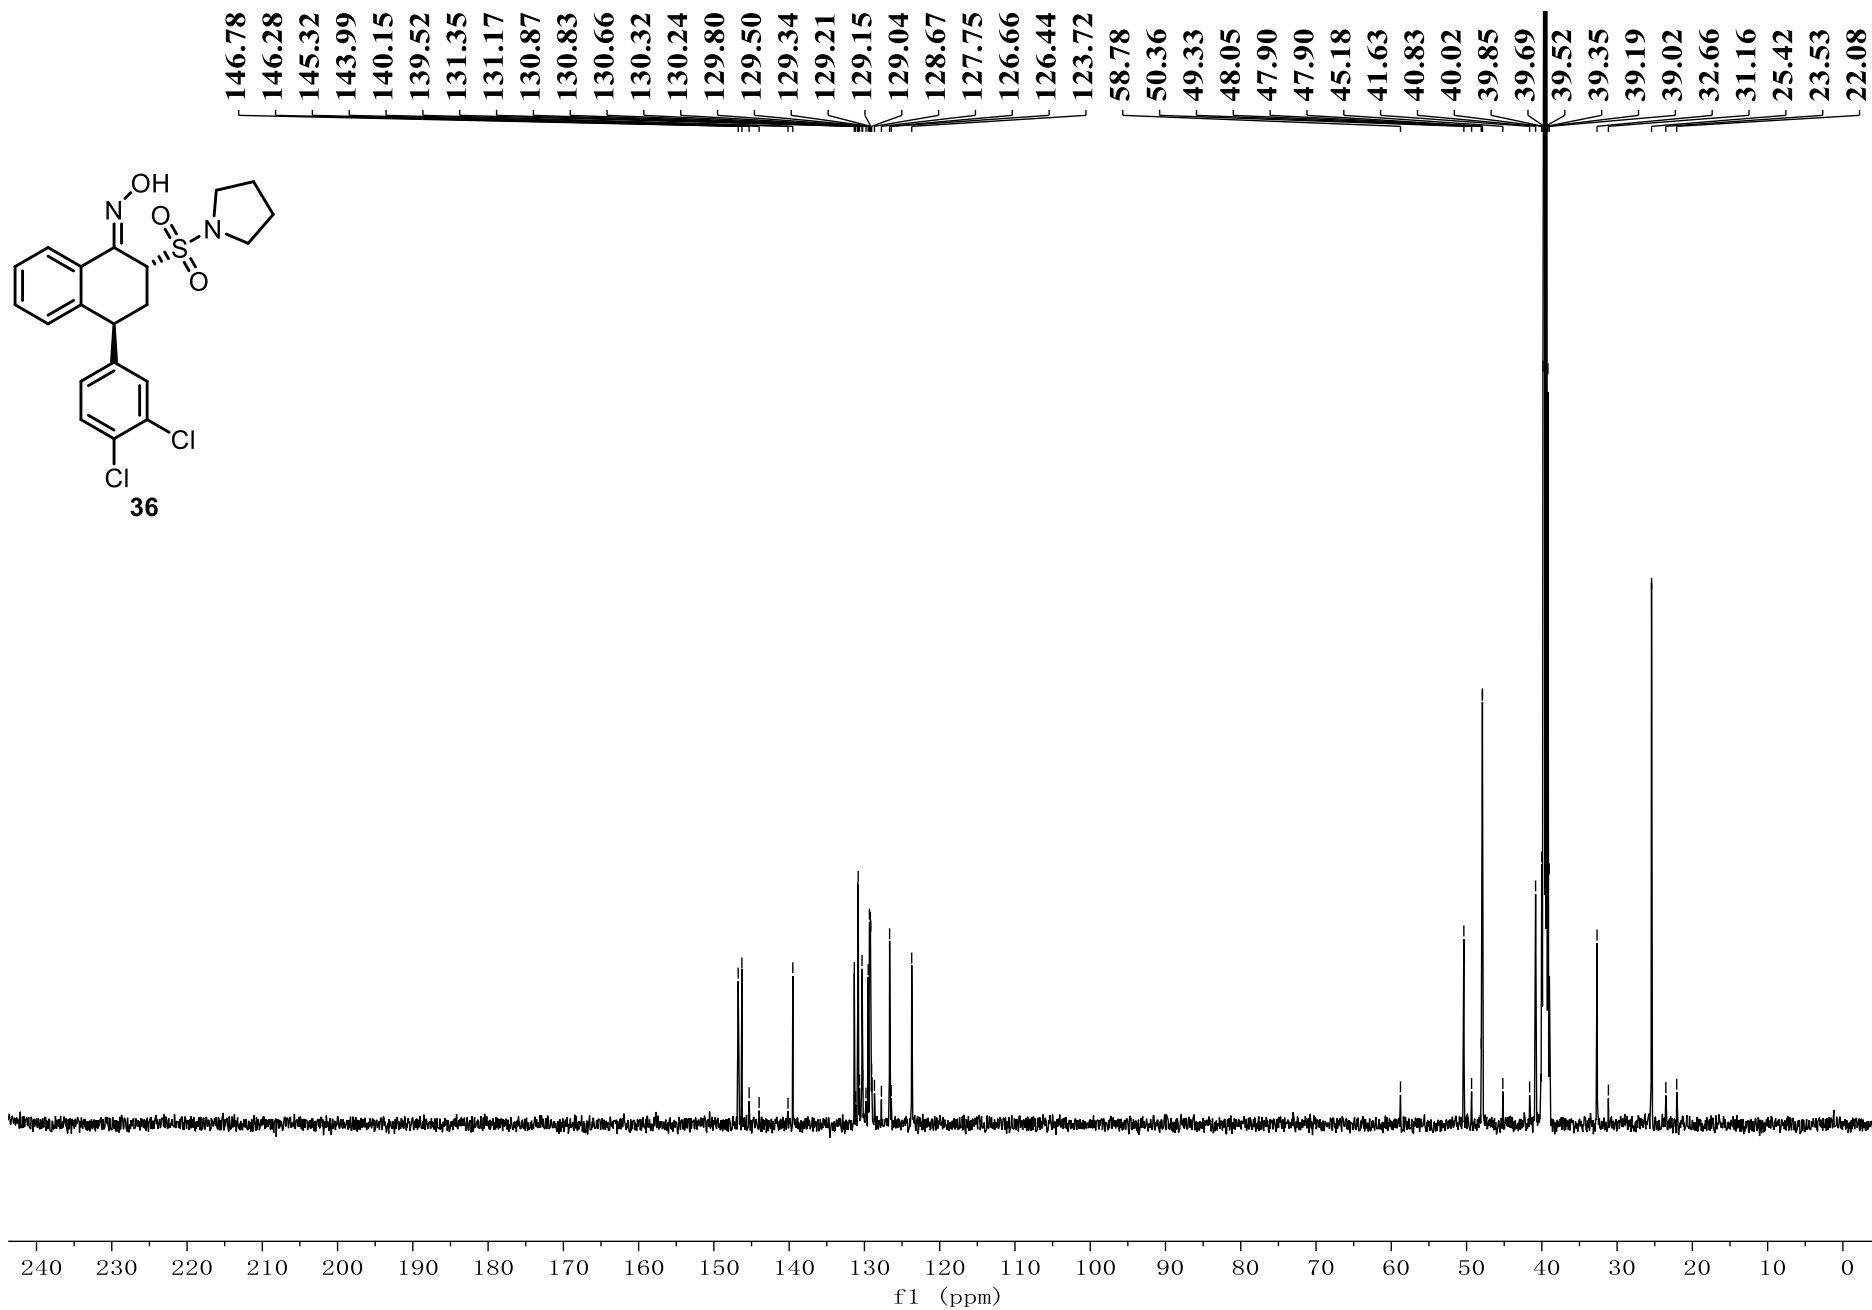



<sup>1</sup>H NMR (500 MHz, DMSO-d<sub>6</sub>) for 37

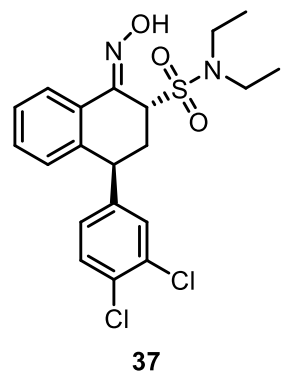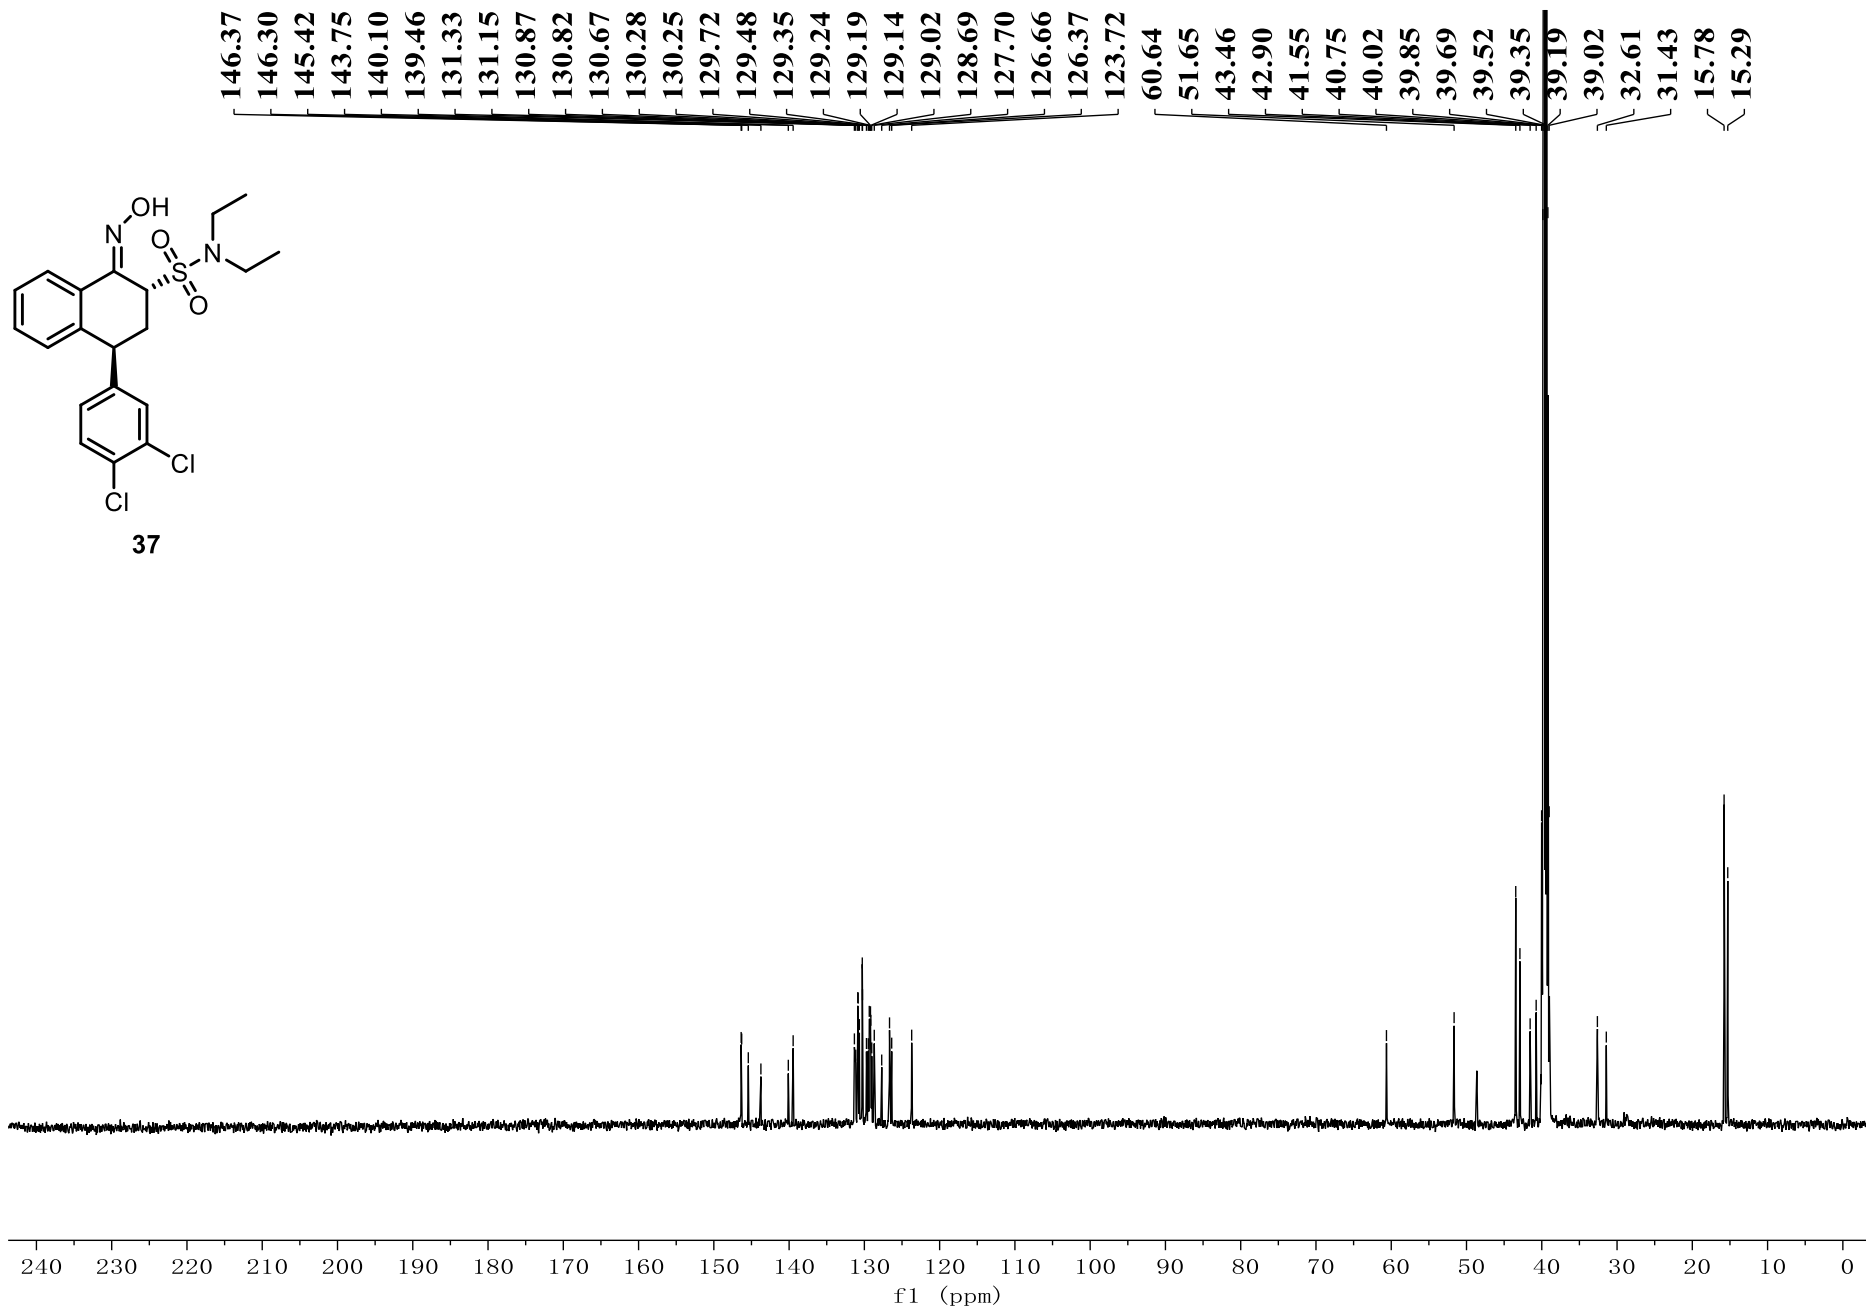

<sup>1</sup>H NMR (500 MHz, CD<sub>3</sub>CN) for 38

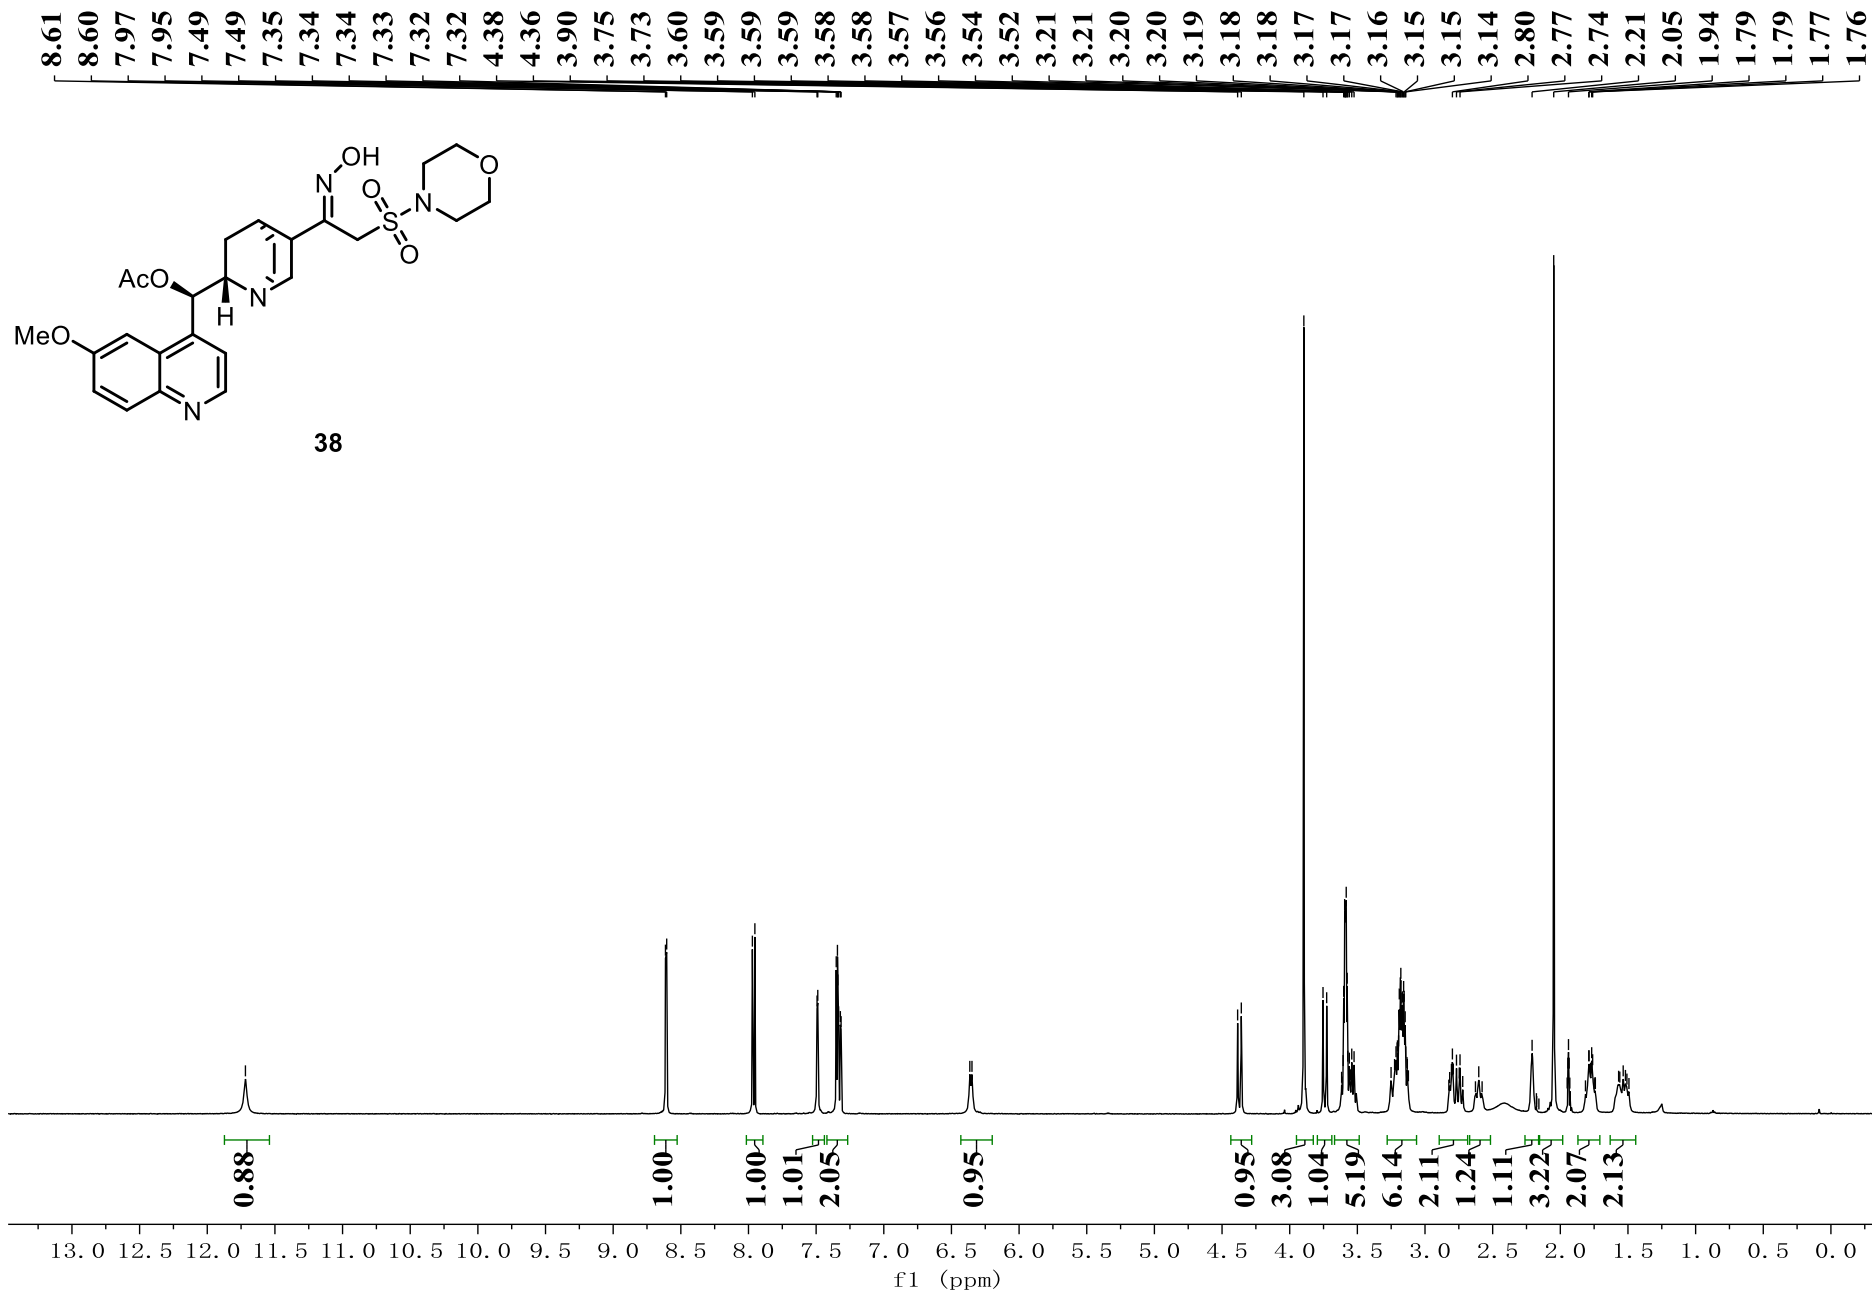

<sup>13</sup>C NMR (125 MHz, CD<sub>3</sub>CN) for 38

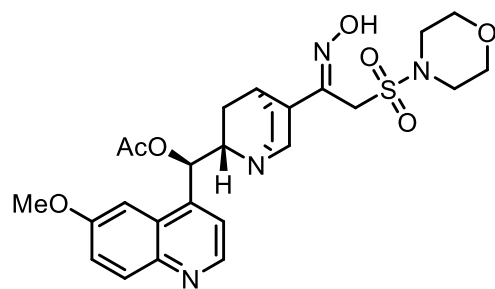

38

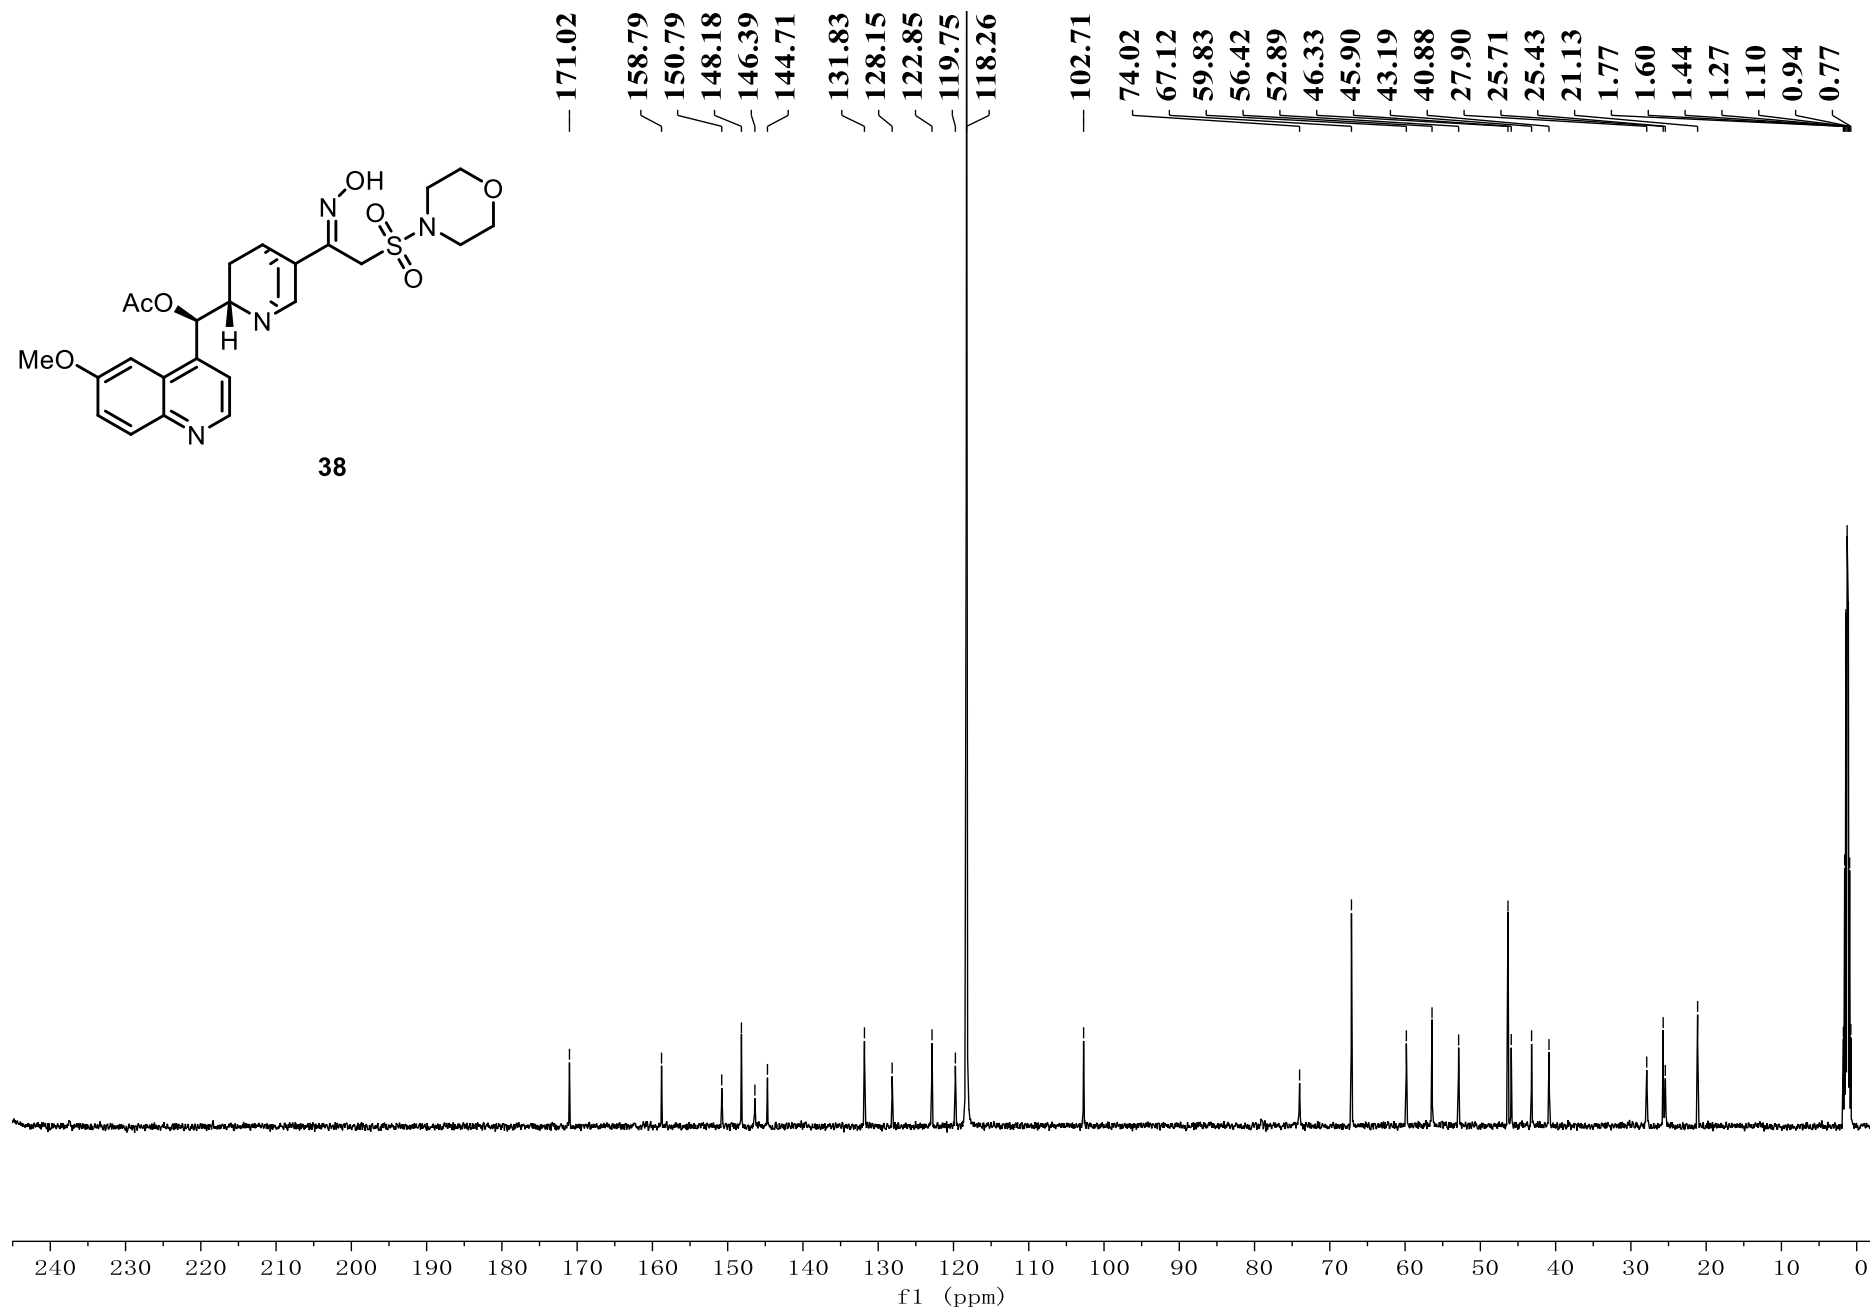

<sup>1</sup>H NMR (500 MHz, CDCl<sub>3</sub>) for 39

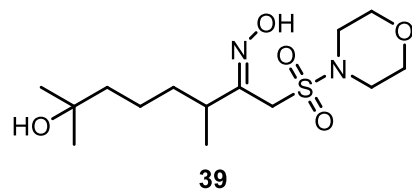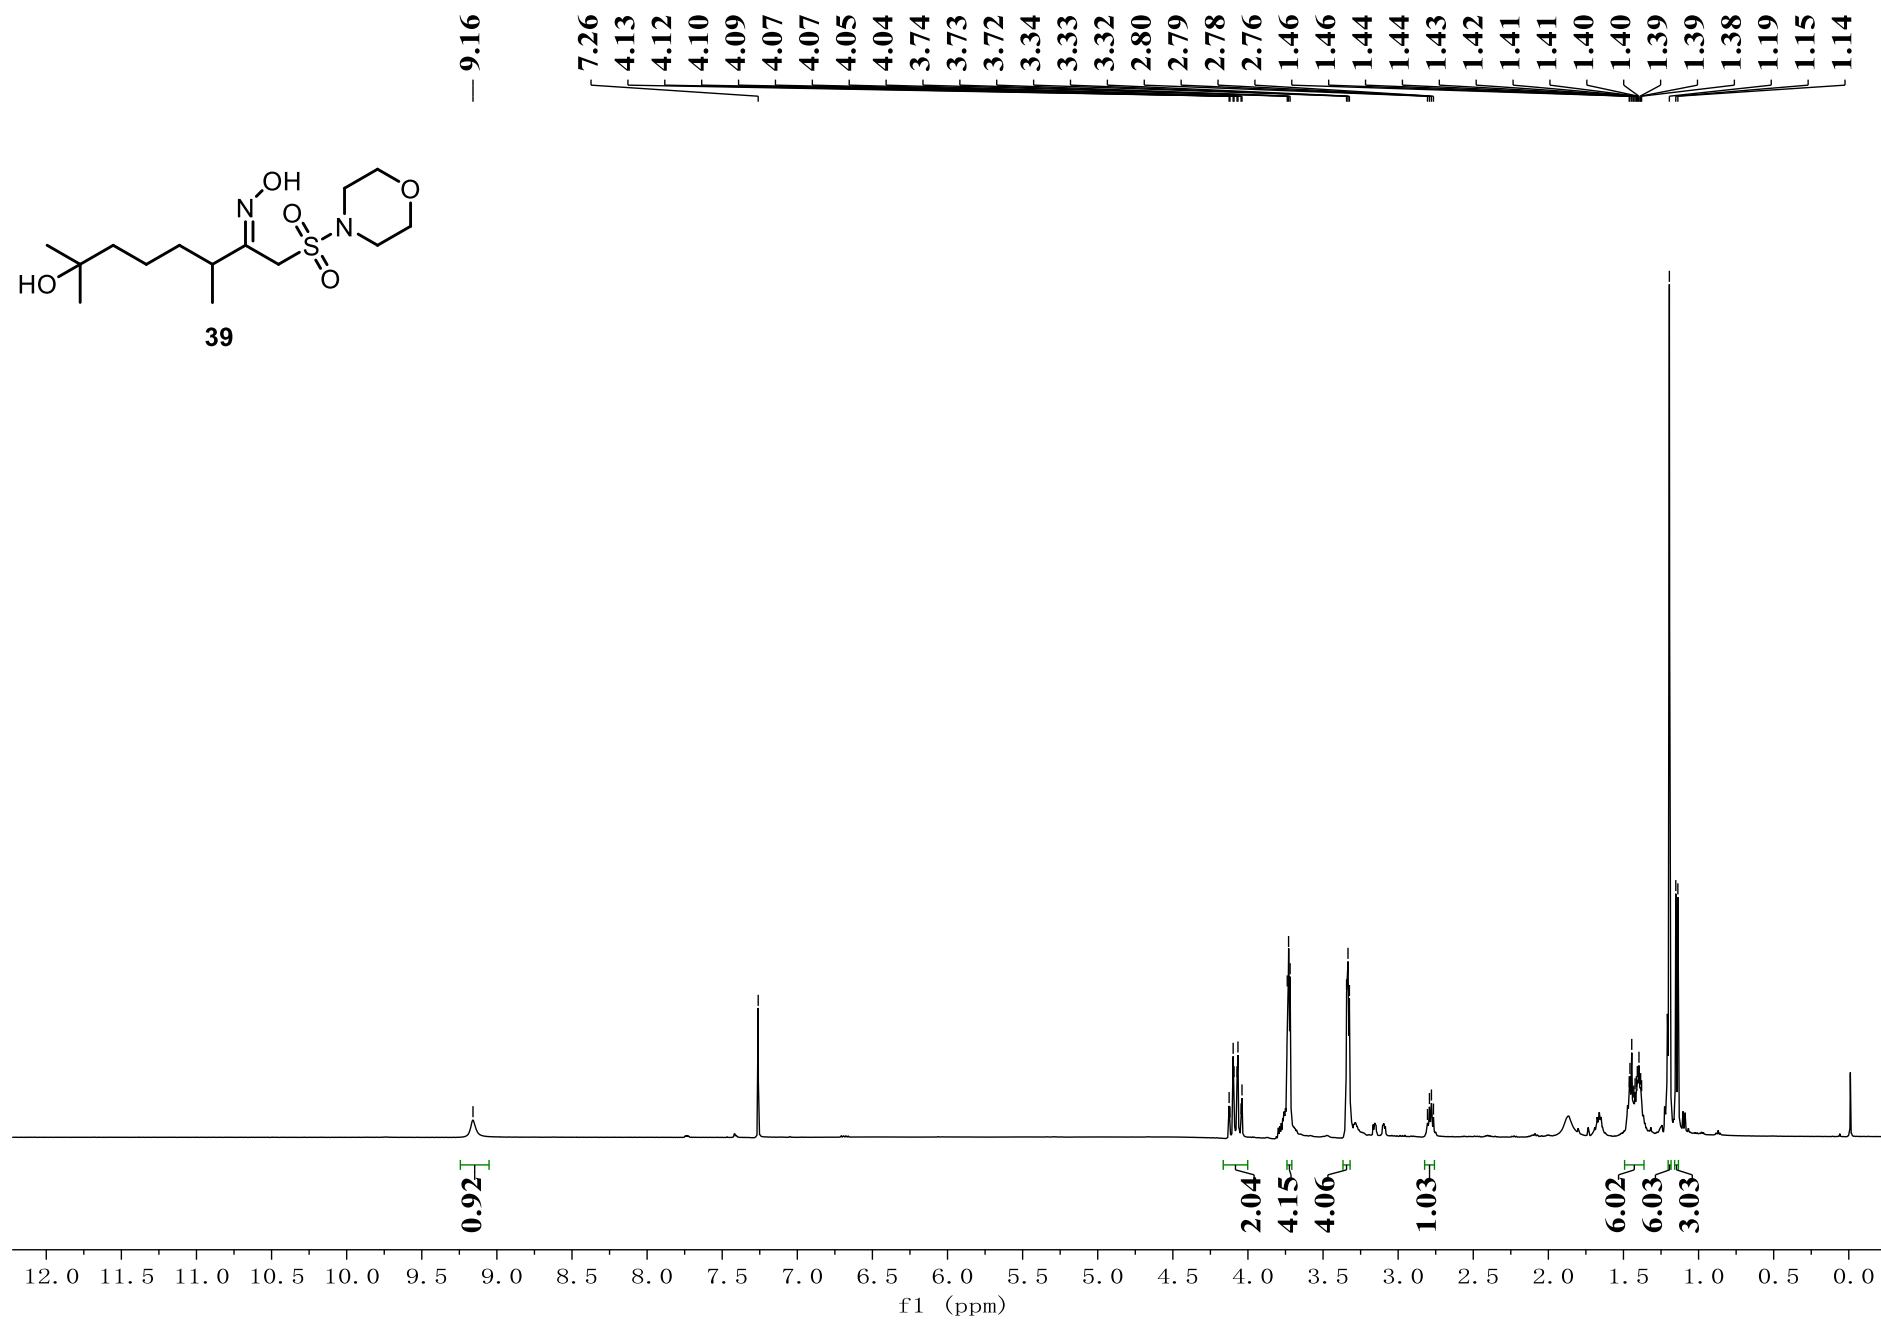

<sup>13</sup>C NMR (125 MHz, CDCl<sub>3</sub>) for 39

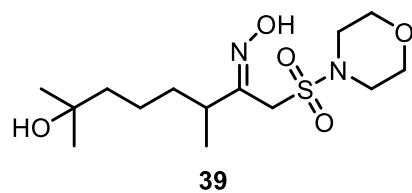

— 154.26

77.41  
77.16  
76.91  
71.23  
66.81  
45.83  
45.59  
43.59  
37.98  
34.60  
29.50  
29.32  
21.67  
18.37

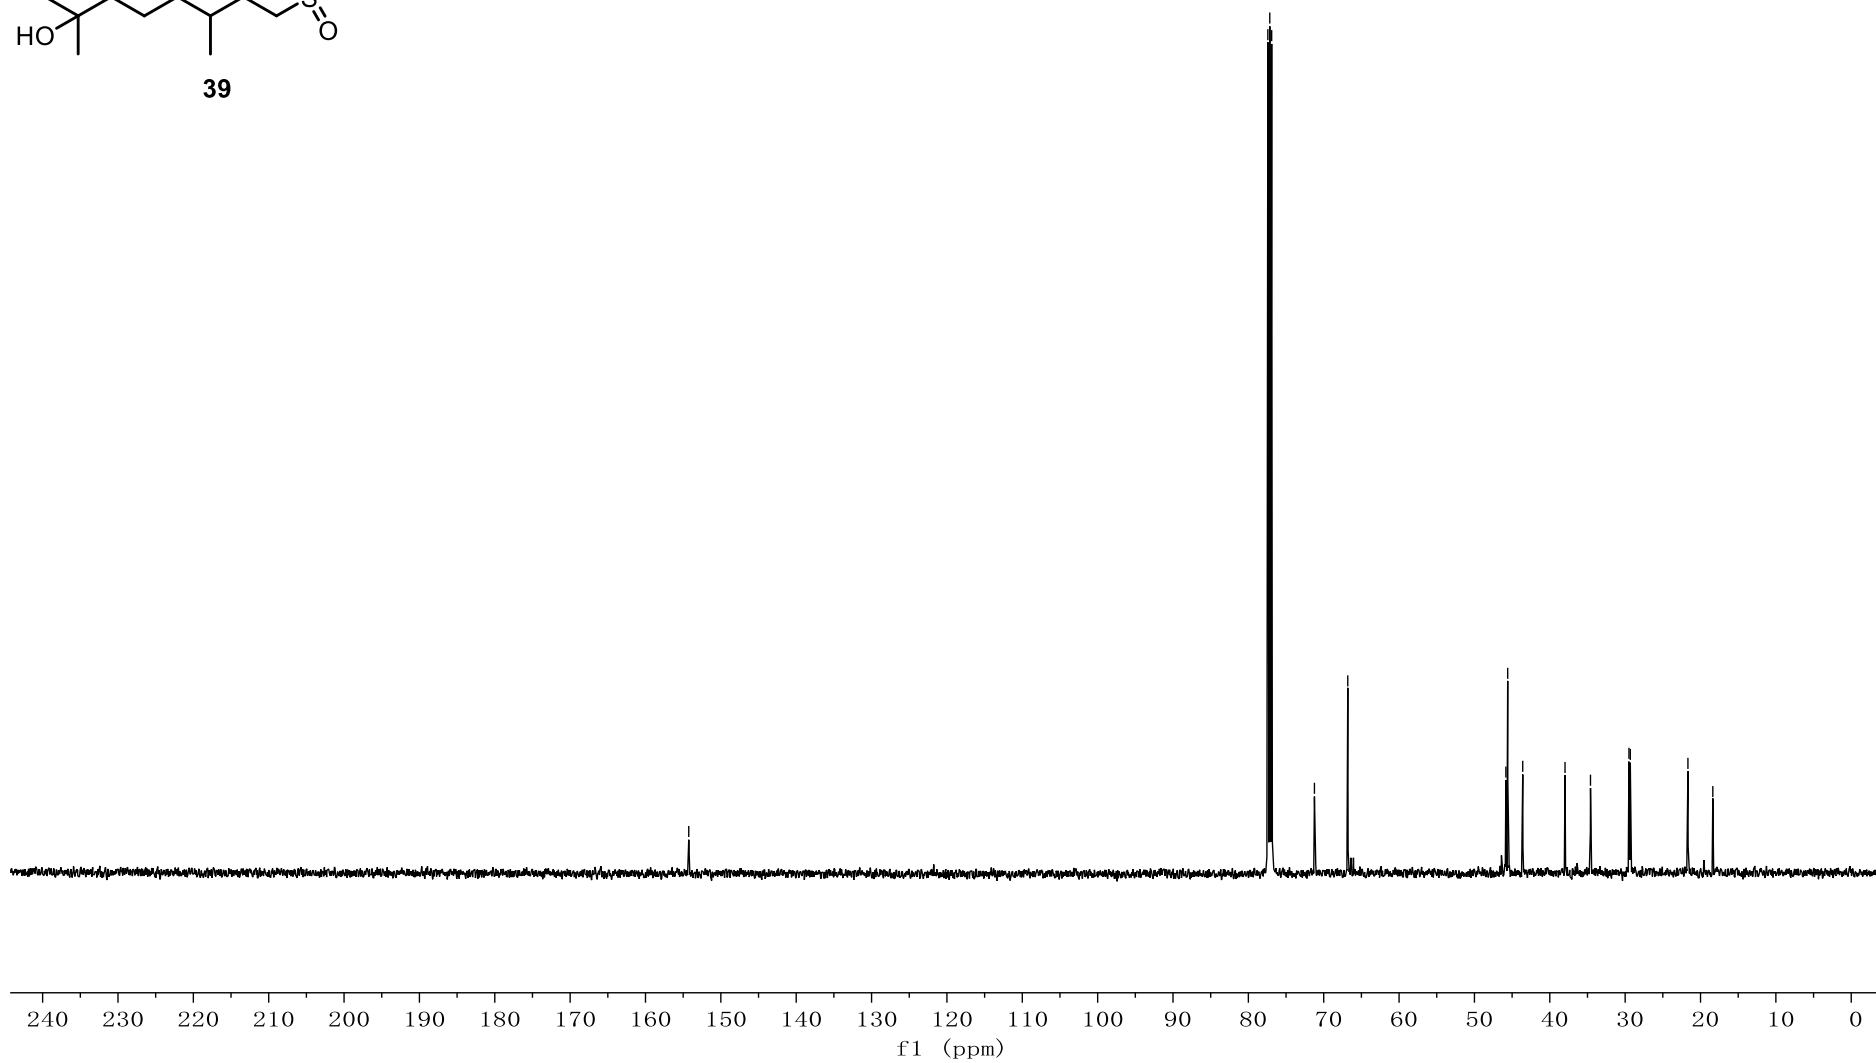

<sup>1</sup>H NMR (500 MHz, CDCl<sub>3</sub>) for 40

7.26  
4.95  
4.95  
4.94  
4.94  
4.74  
3.76  
3.76  
3.75  
3.27  
3.26  
3.26  
3.25  
3.25  
3.24  
3.23  
3.23  
3.22  
3.21  
3.21  
3.20  
2.95  
2.68  
2.66  
2.65  
2.65  
2.63  
2.62  
2.54  
2.53  
2.52  
2.52  
2.51  
2.50  
2.50  
1.88  
1.87  
1.86  
1.86  
1.85  
1.76  
1.69  
1.67  
1.66  
1.65  
1.65  
1.64  
1.63  
1.63  
1.48

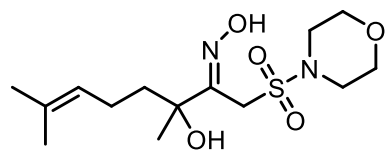

40

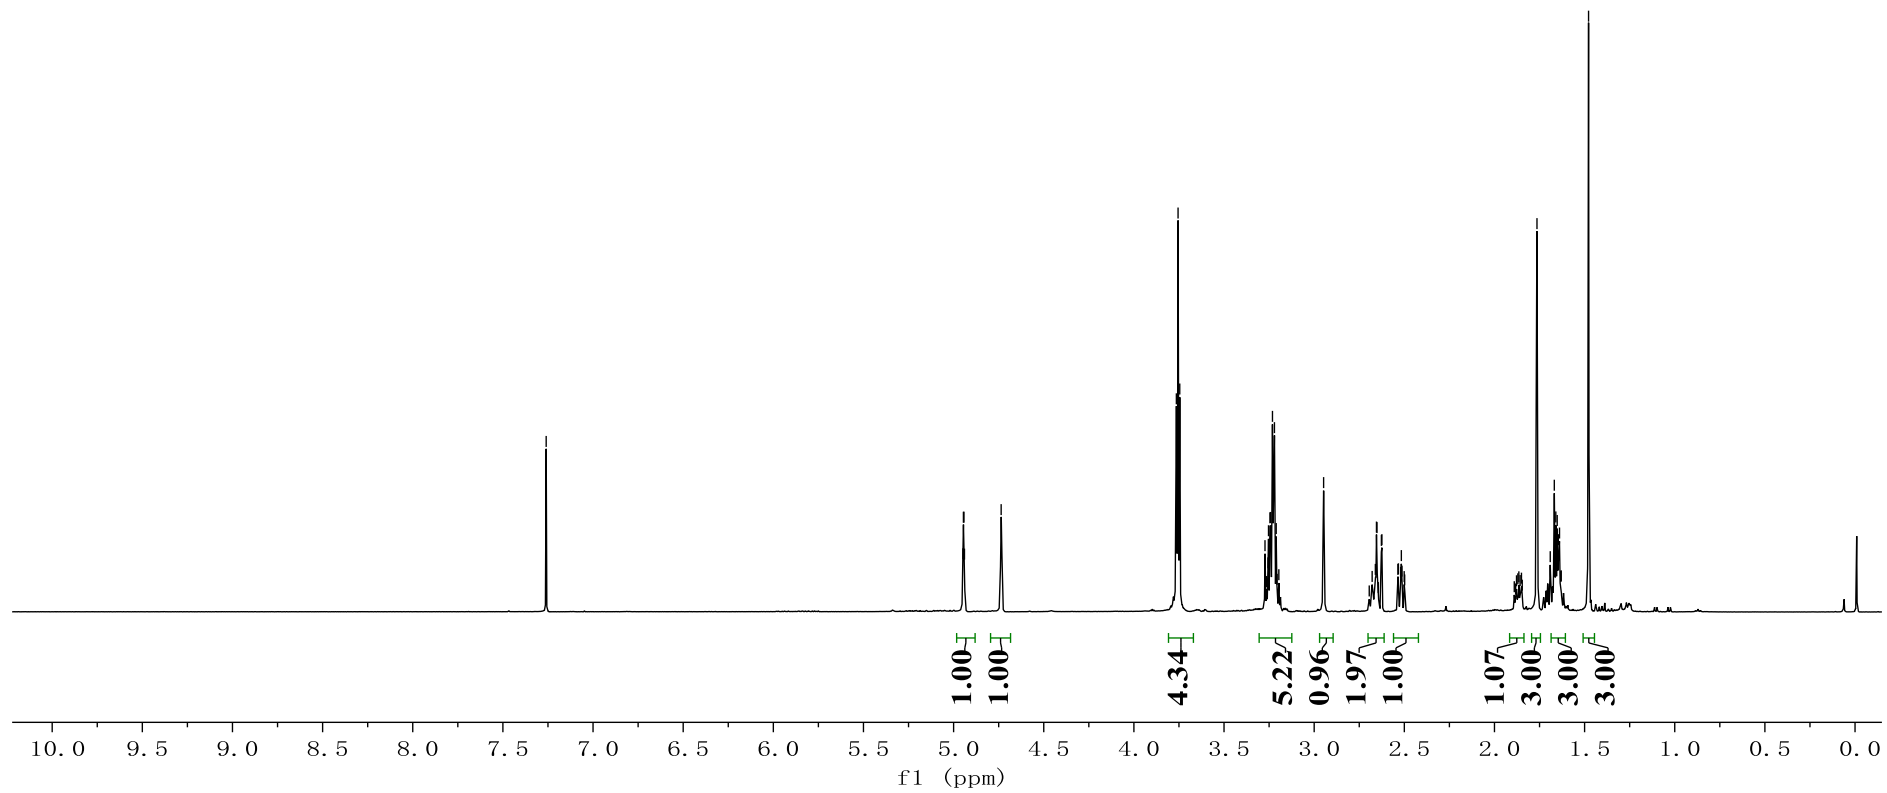

<sup>13</sup>C NMR (125 MHz, CDCl<sub>3</sub>) for 40

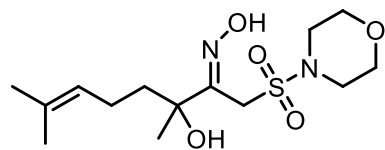

40

— 144.75

— 112.74

79.06  
77.41  
77.16  
76.91  
— 66.54

50.62  
45.97  
45.48  
44.24  
39.62  
32.06  
26.84  
23.01

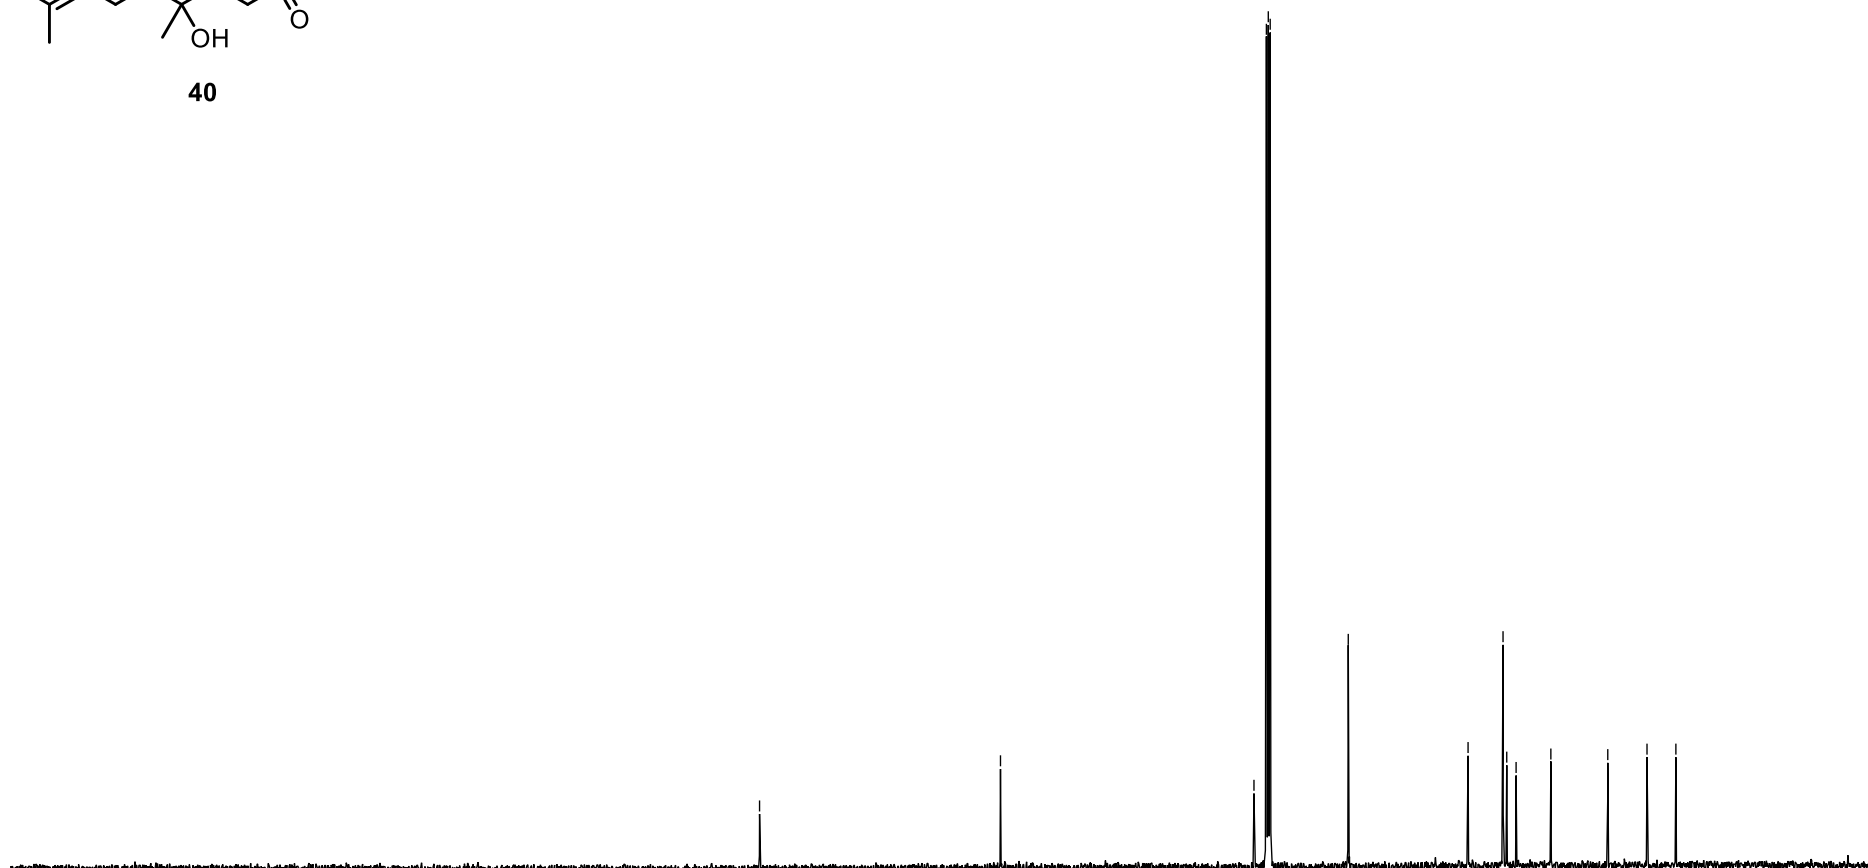

f1 (ppm)

<sup>1</sup>H NMR (500 MHz, CDCl<sub>3</sub>) for 41

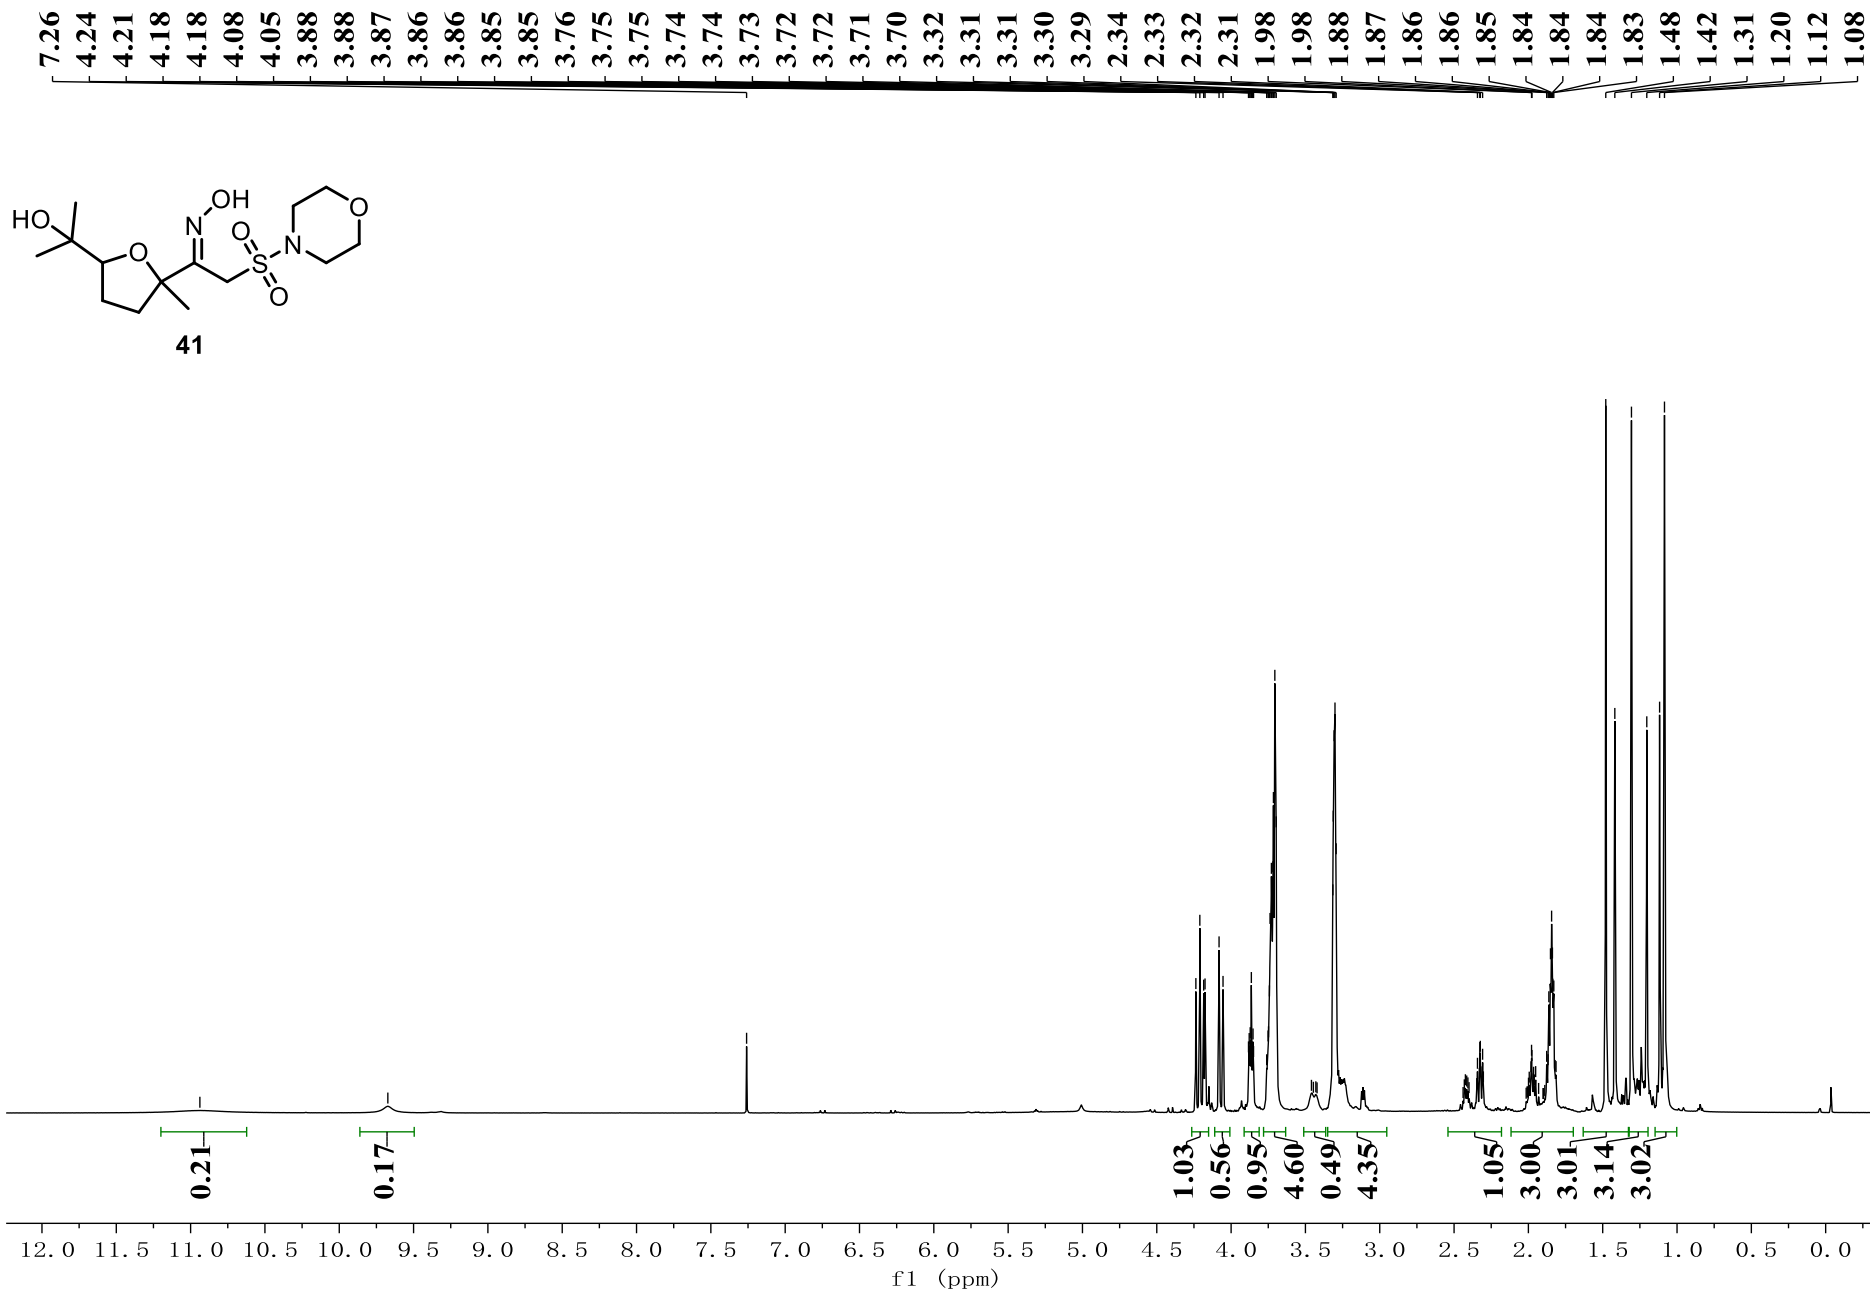



<sup>13</sup>C NMR (125 MHz, CDCl<sub>3</sub>) for 41

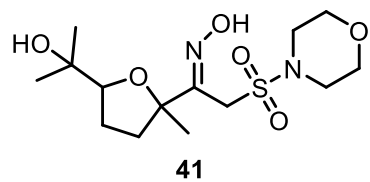

154.42  
153.70

86.95  
86.19  
83.96  
83.87  
77.42  
77.16  
76.91  
71.60  
71.11  
66.66  
66.02  
45.68  
45.57  
45.21  
37.60  
28.28  
27.31  
27.22  
26.40  
26.23  
25.49  
25.09  
24.00

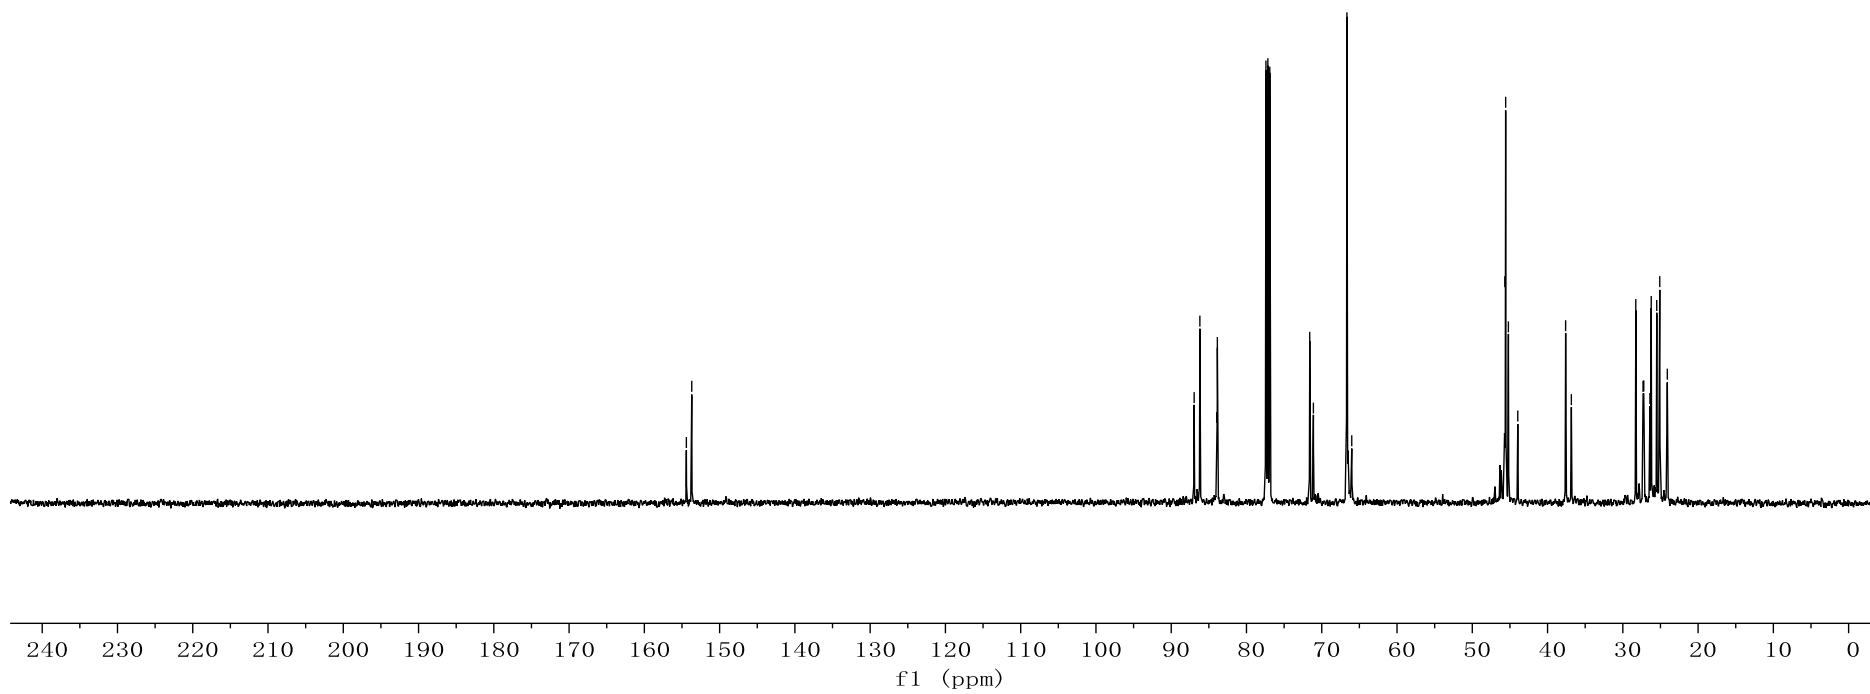

<sup>1</sup>H NMR (500 MHz, DMSO-d<sub>6</sub>) for 42

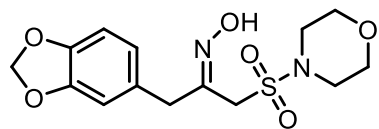

42

11.68  
11.58

6.86  
6.85  
6.85  
6.83  
6.76  
6.76  
6.72  
6.72  
6.69  
6.69  
6.68  
6.68  
6.66  
6.66  
5.98  
5.97  
3.97  
3.86  
3.71  
3.62  
3.61  
3.61  
3.39  
3.20  
3.19  
3.19  
3.19  
3.18  
3.18  
3.17  
3.17  
2.51  
2.50  
2.50  
2.50  
2.49

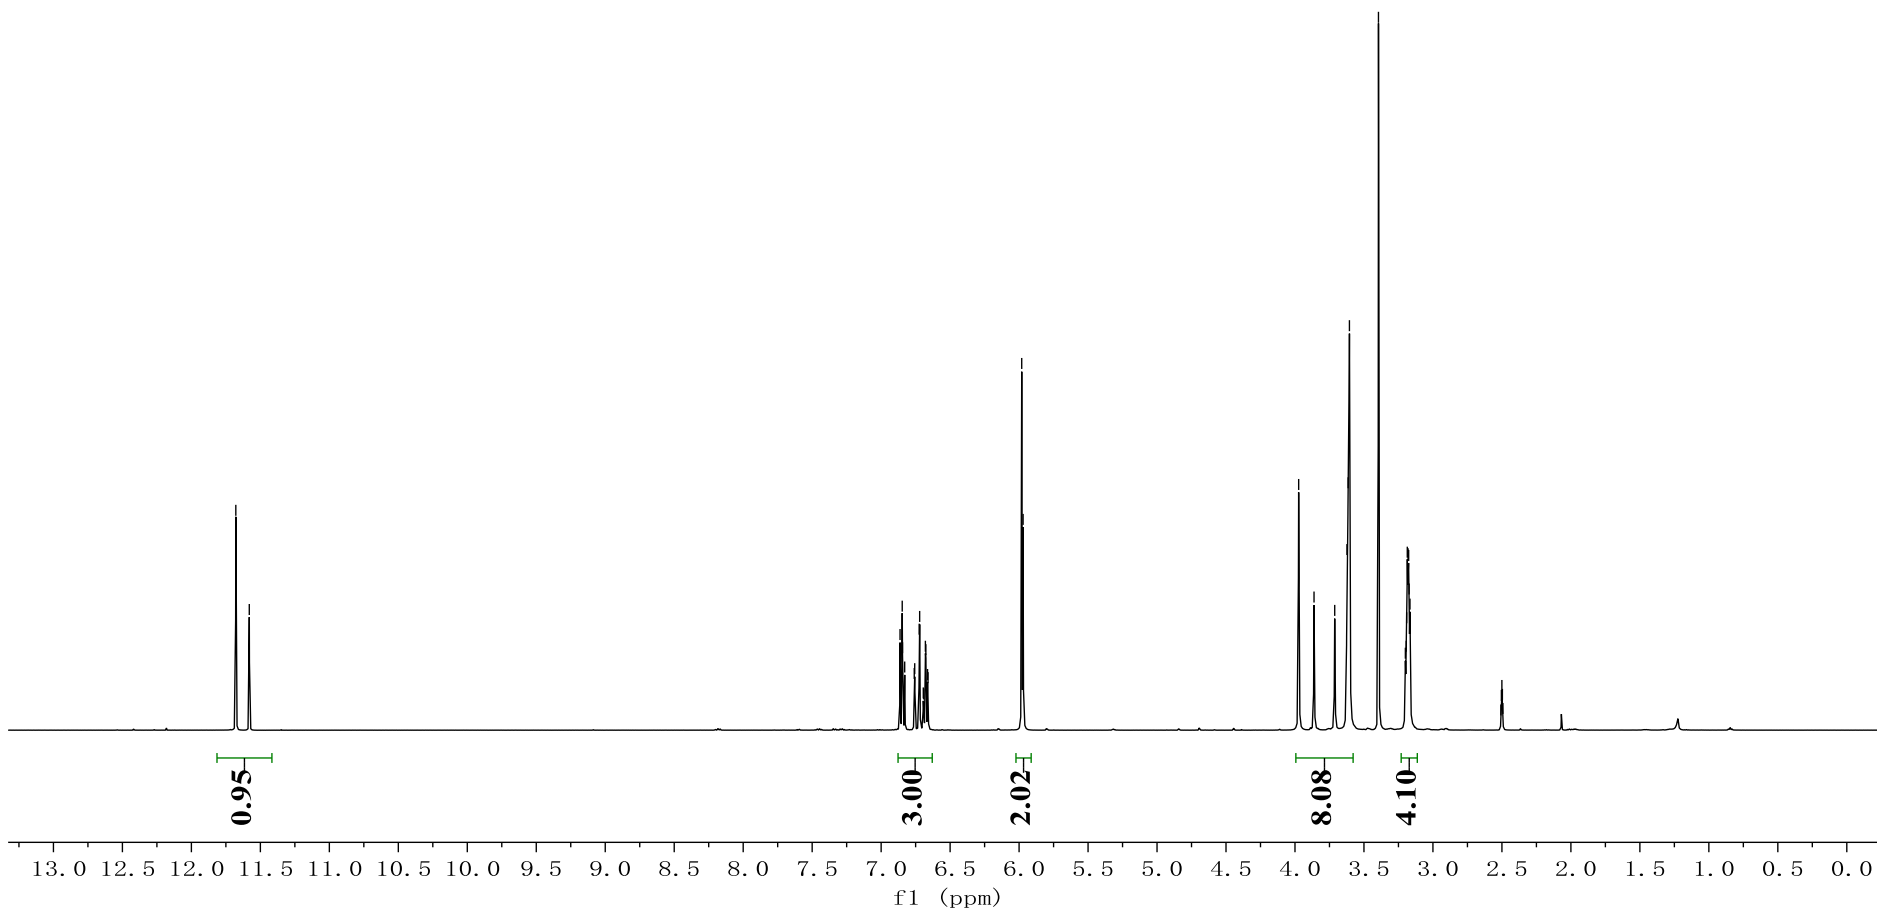

<sup>13</sup>C NMR (125 MHz, DMSO-*d*<sub>6</sub>) for 42

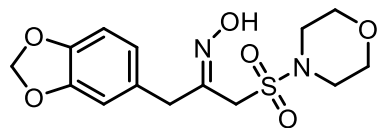

42

148.62  
147.44  
147.37  
146.11  
145.90  
130.16  
129.60  
122.24  
122.07  
109.44  
109.34  
108.37  
100.94  
100.91

65.89  
51.92  
45.64  
45.24  
44.21  
40.02  
39.85  
39.69  
39.52  
39.35  
39.19  
39.02  
38.87  
32.46

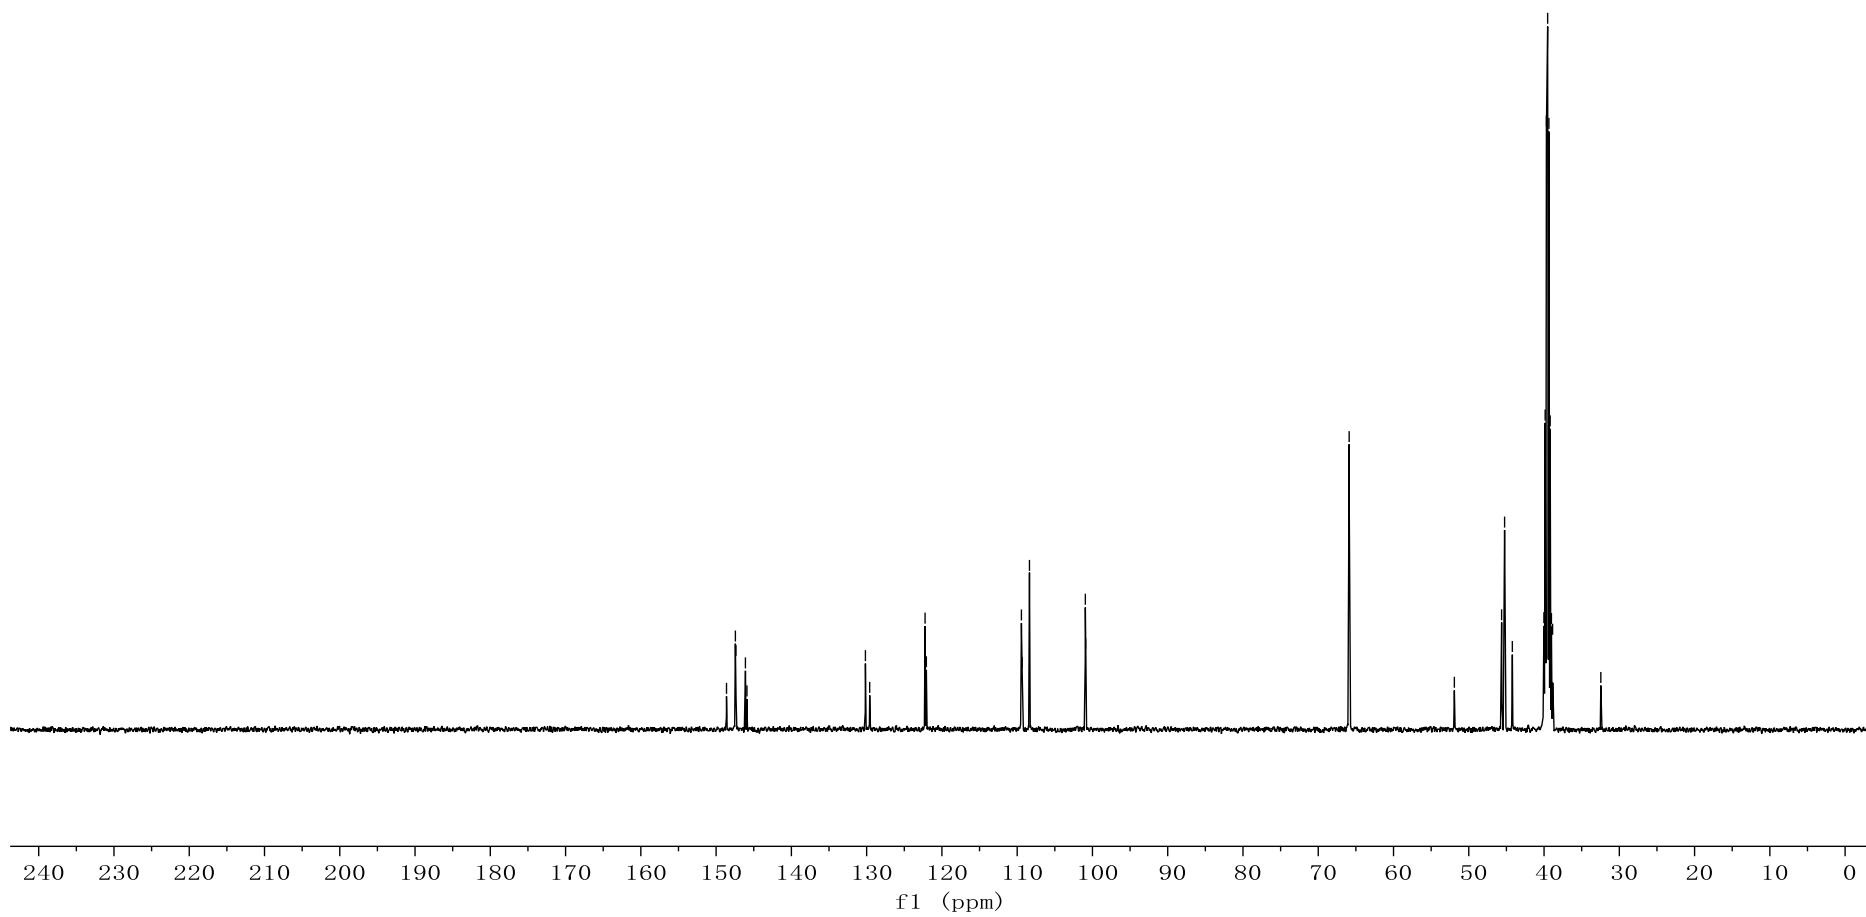

<sup>1</sup>H NMR (500 MHz, CDCl<sub>3</sub>) for 43

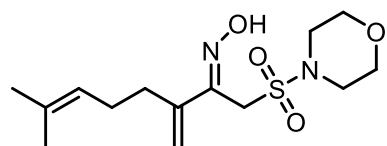

43

8.38  
8.05  
8.03

7.26

6.19  
6.17

5.08  
5.08  
5.07  
5.07  
5.06  
5.05

3.74  
3.73  
3.72  
3.31  
3.30  
3.30

2.50  
2.49  
2.47

2.18  
2.16  
2.15  
2.13  
1.67  
1.59

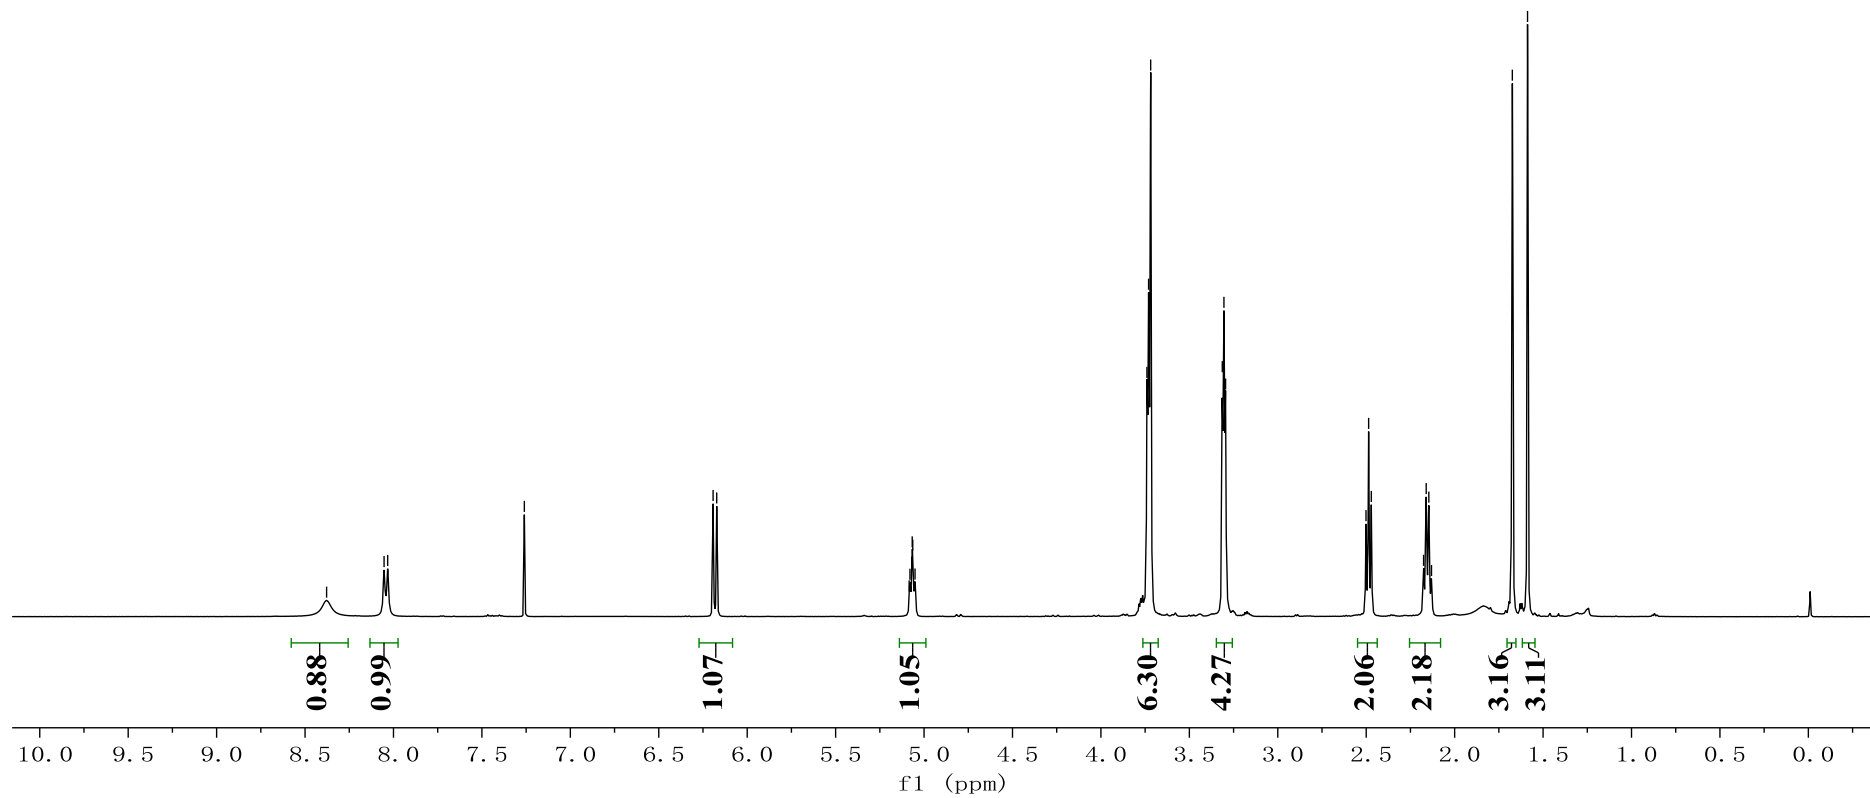

<sup>13</sup>C NMR (125 MHz, CDCl<sub>3</sub>) for 43

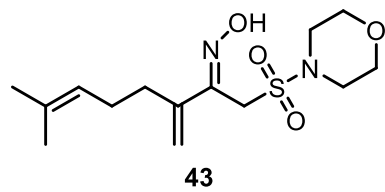

- 147.68
- ~ 137.74
- ~ 133.75
- ~ 127.18
- ~ 122.42
- 77.42
- 77.16
- 76.91
- 66.82
- 57.15
- 46.36
- 46.32
- ~ 30.85
- ~ 27.07
- ~ 25.77
- ~ 17.93

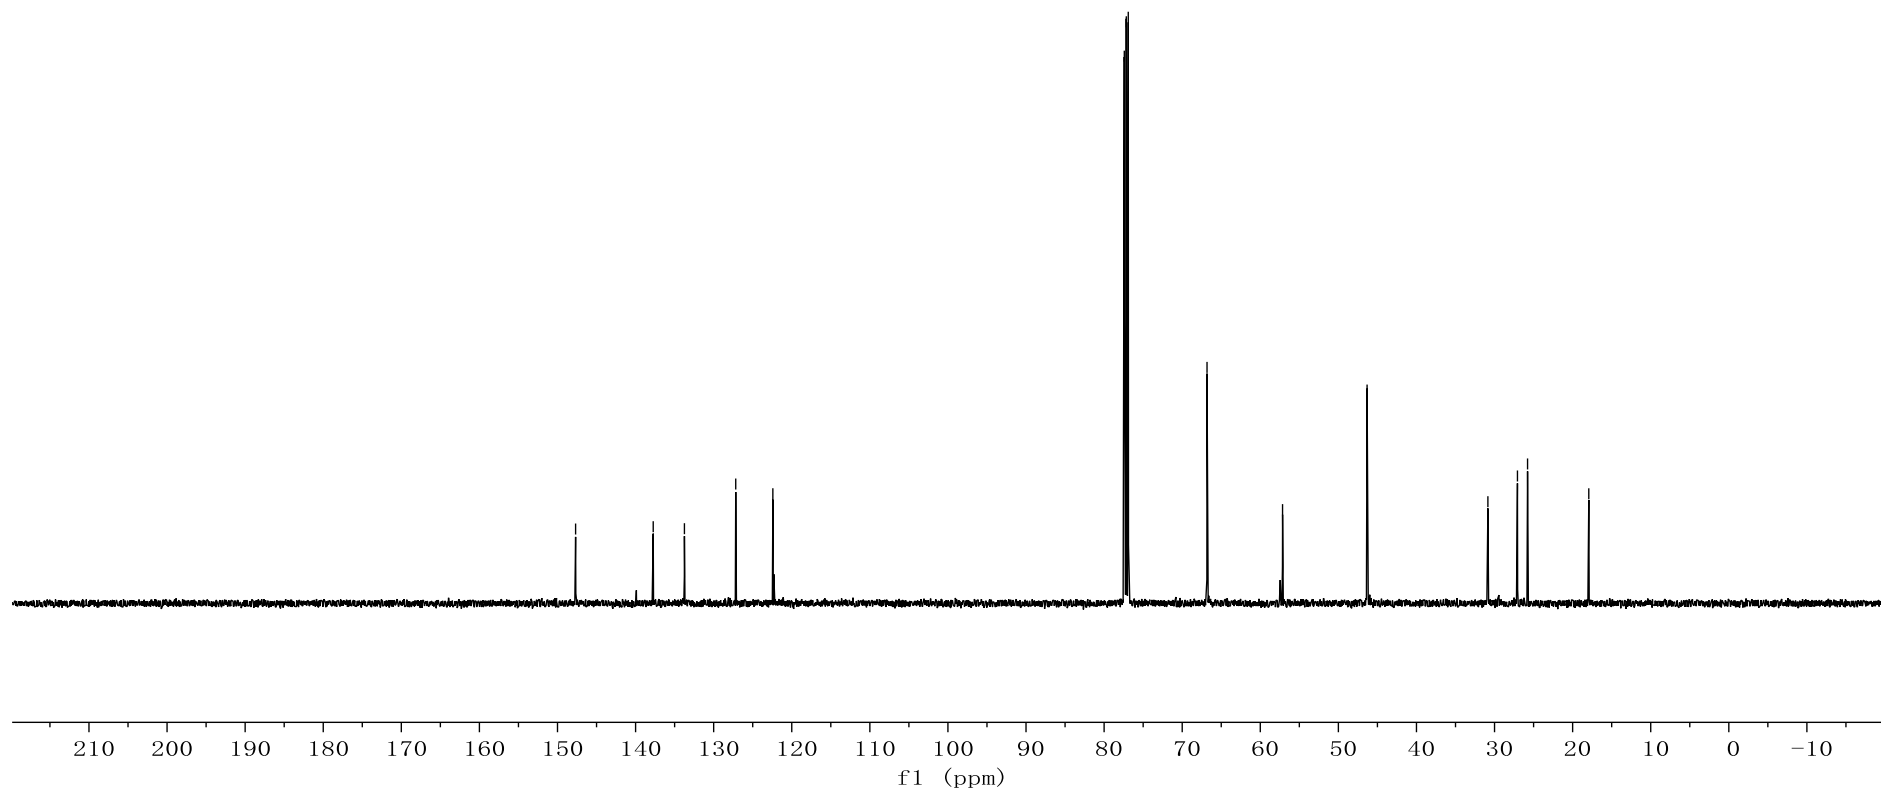

<sup>1</sup>H NMR (500 MHz, CDCl<sub>3</sub>) for 44

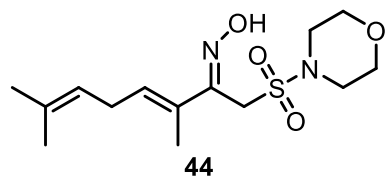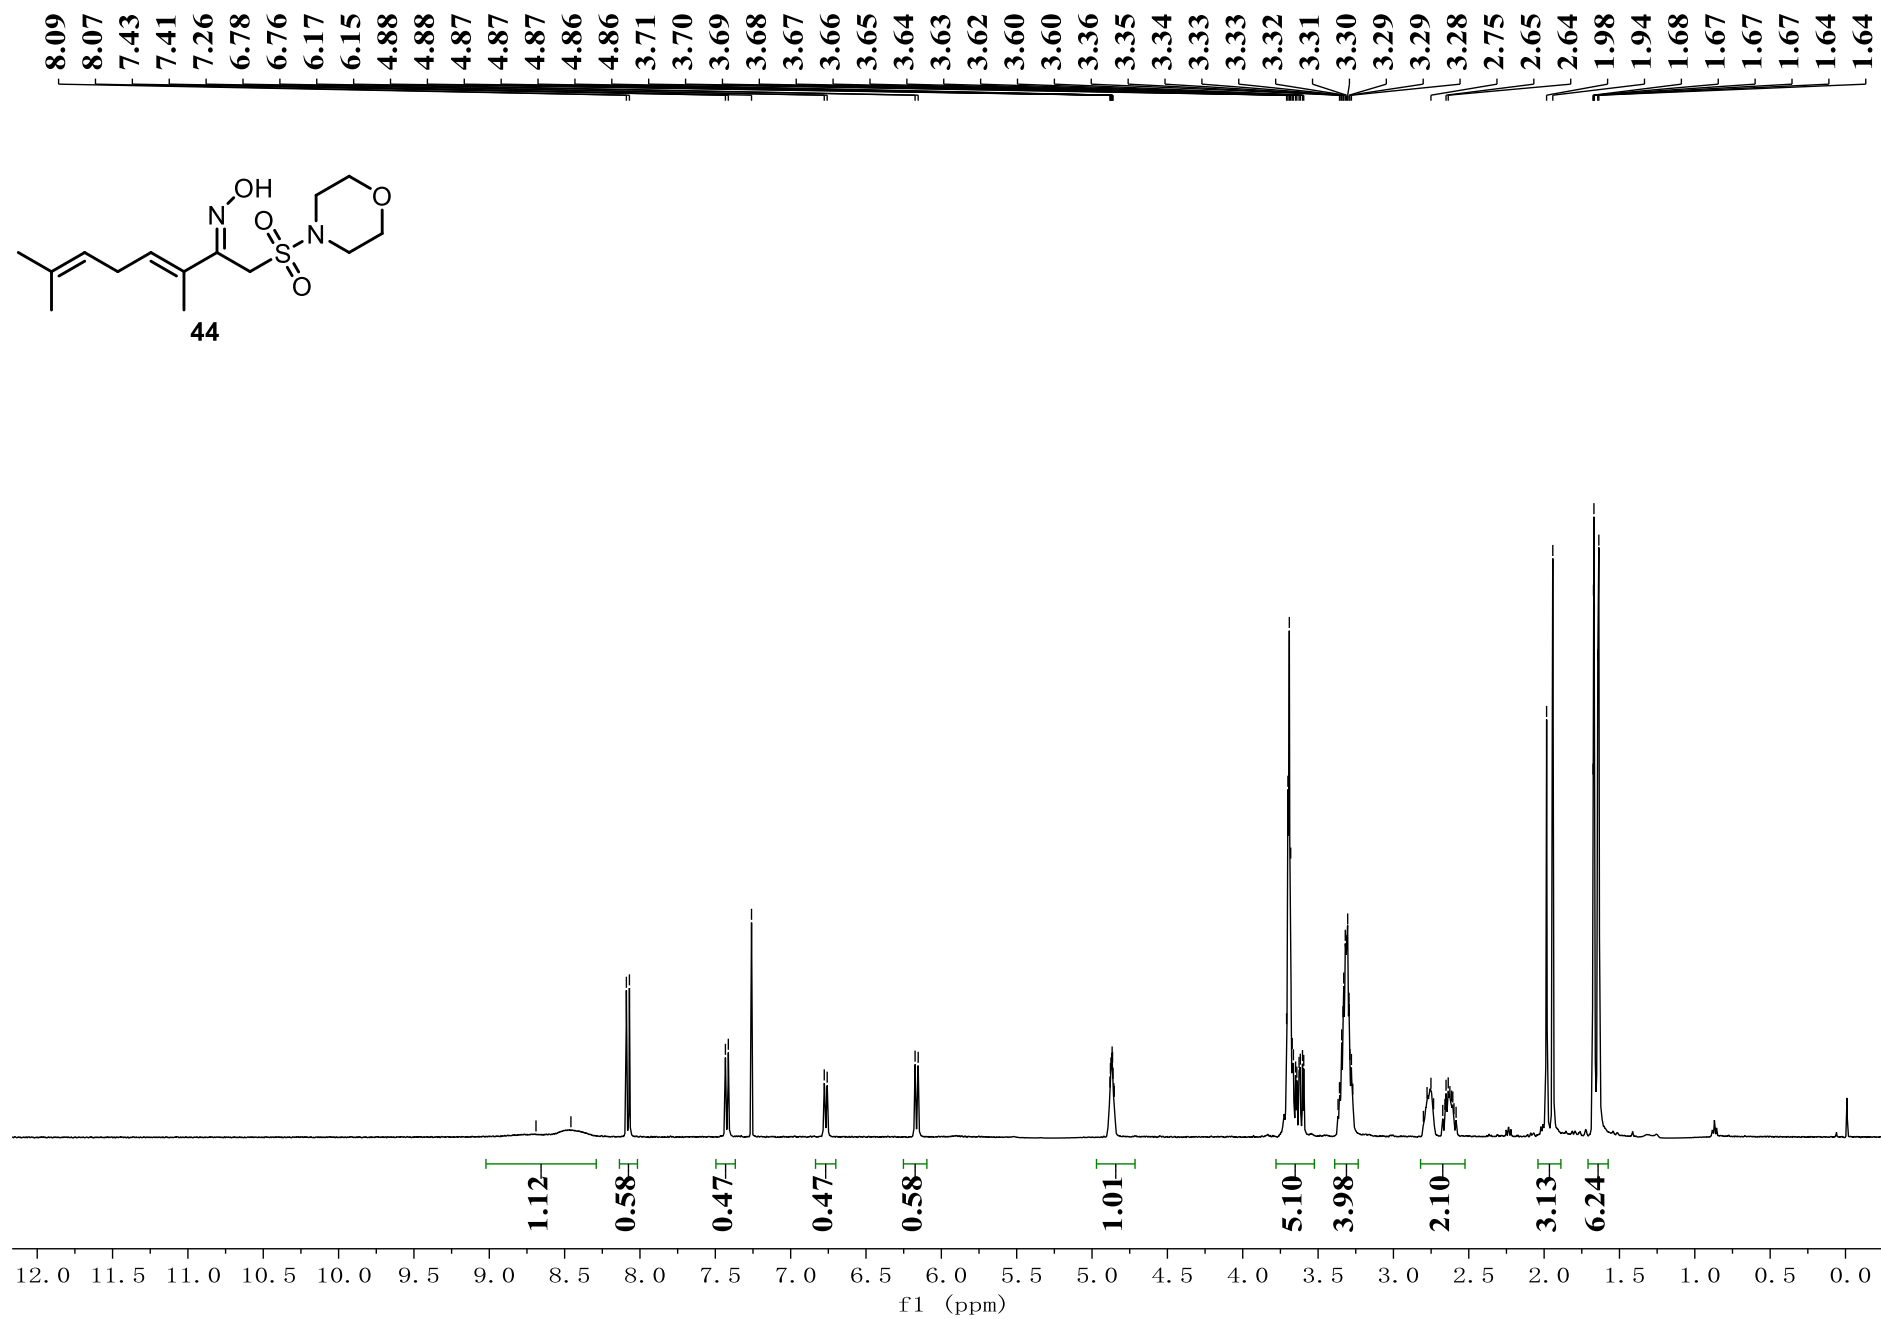



<sup>1</sup>H NMR (500 MHz, CD<sub>3</sub>CN) for 45

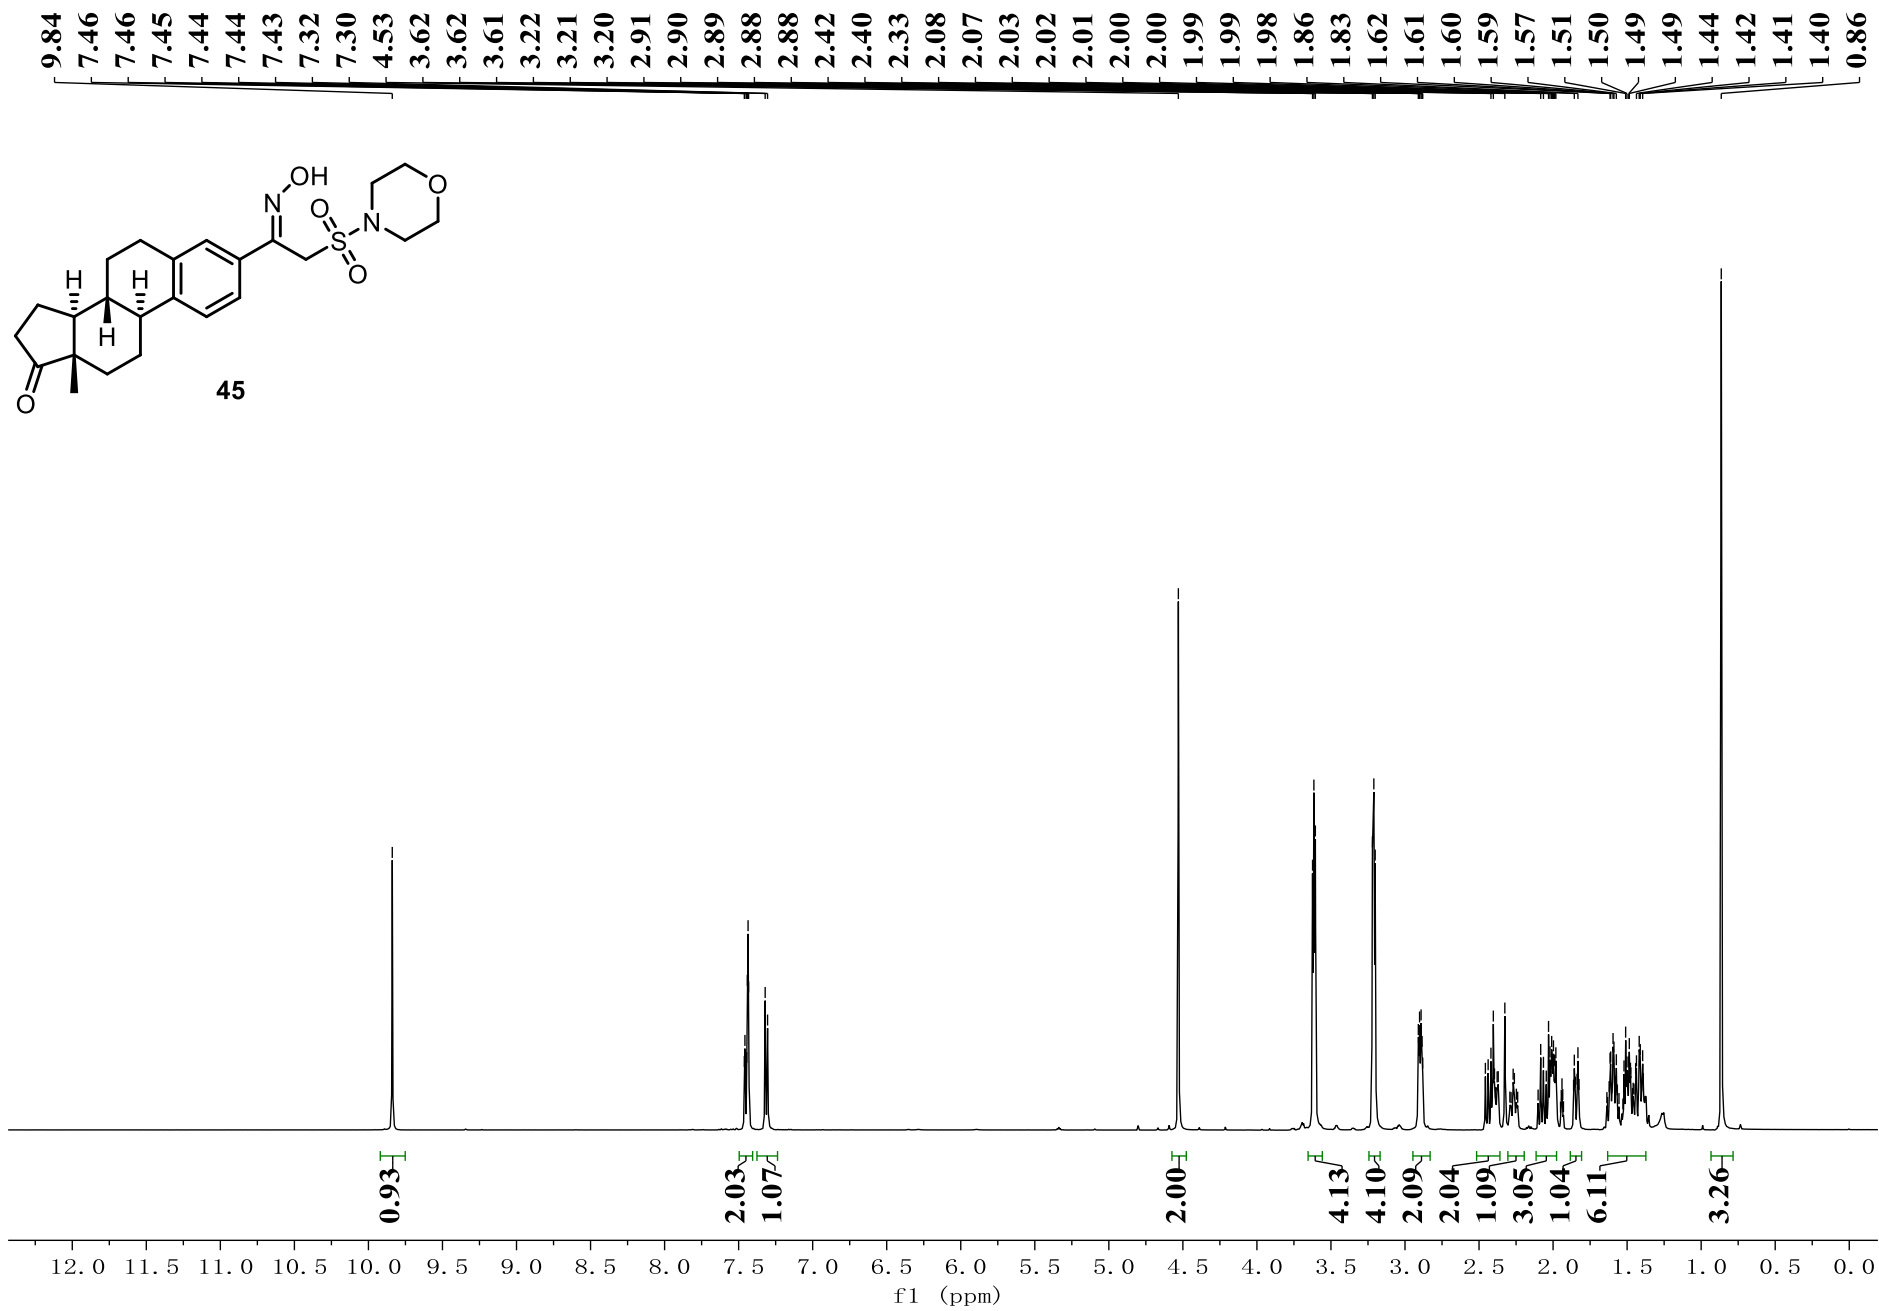



<sup>13</sup>C NMR (125 MHz, CD<sub>3</sub>CN) for 45

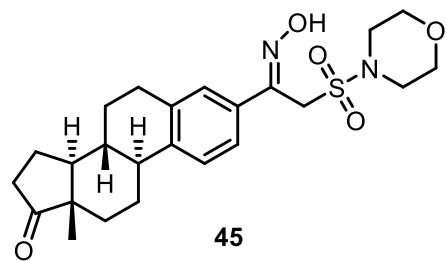

148.64  
142.60  
137.75  
132.90  
127.92  
126.38  
124.89  
118.26

67.17  
51.10  
48.59  
46.45  
45.16  
45.09  
38.72  
36.27  
32.44  
30.00  
27.04  
26.35  
22.12  
14.19  
1.78  
1.62  
1.45  
1.28  
1.12  
0.95  
0.79

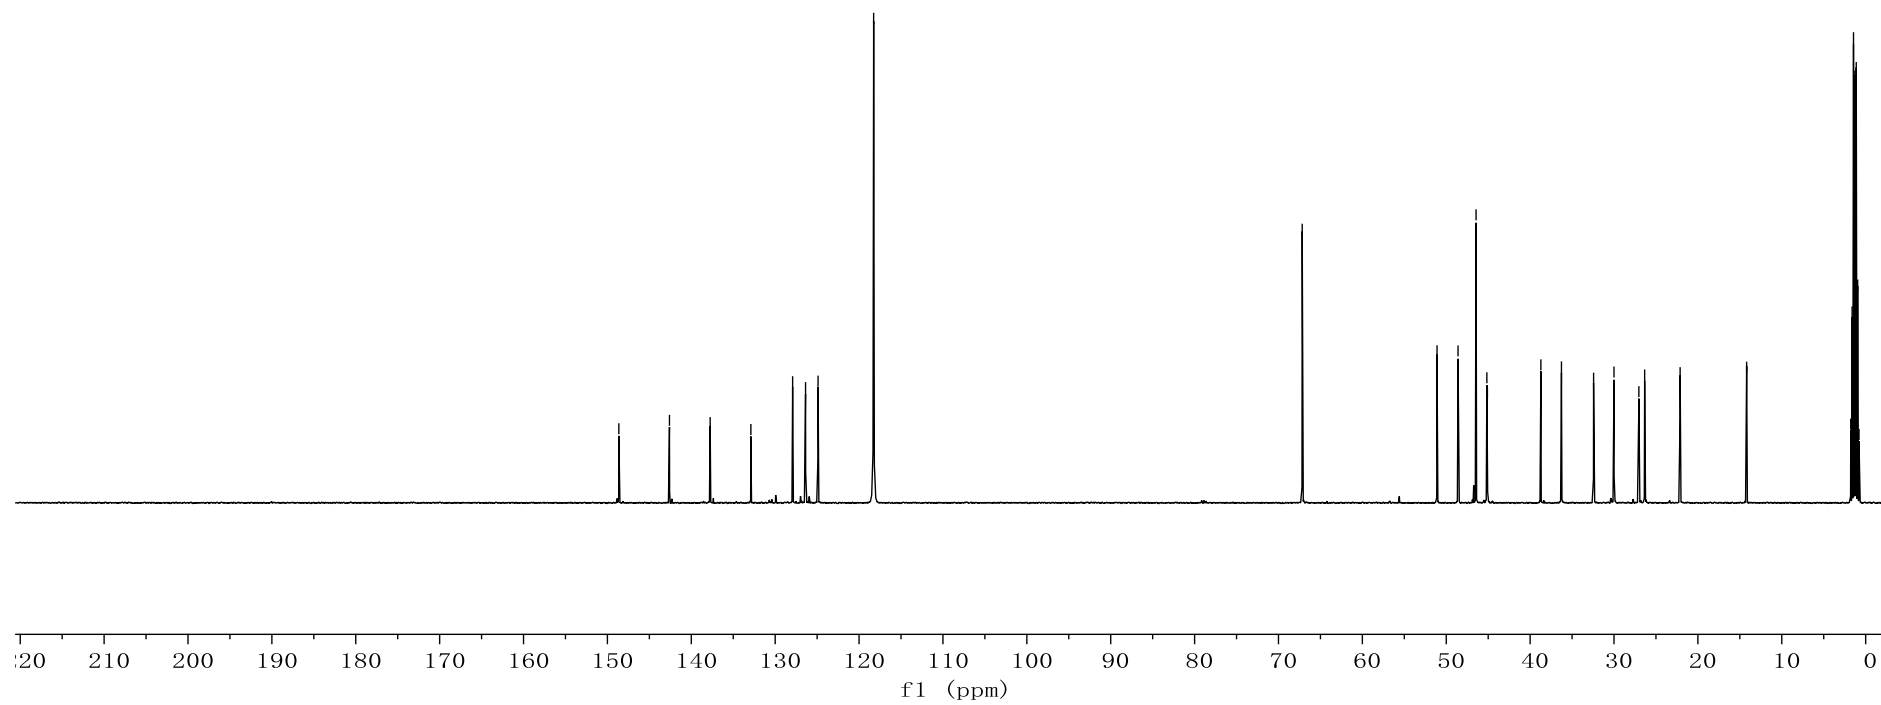

<sup>1</sup>H NMR (500 MHz, DMSO-d<sub>6</sub>) for 46

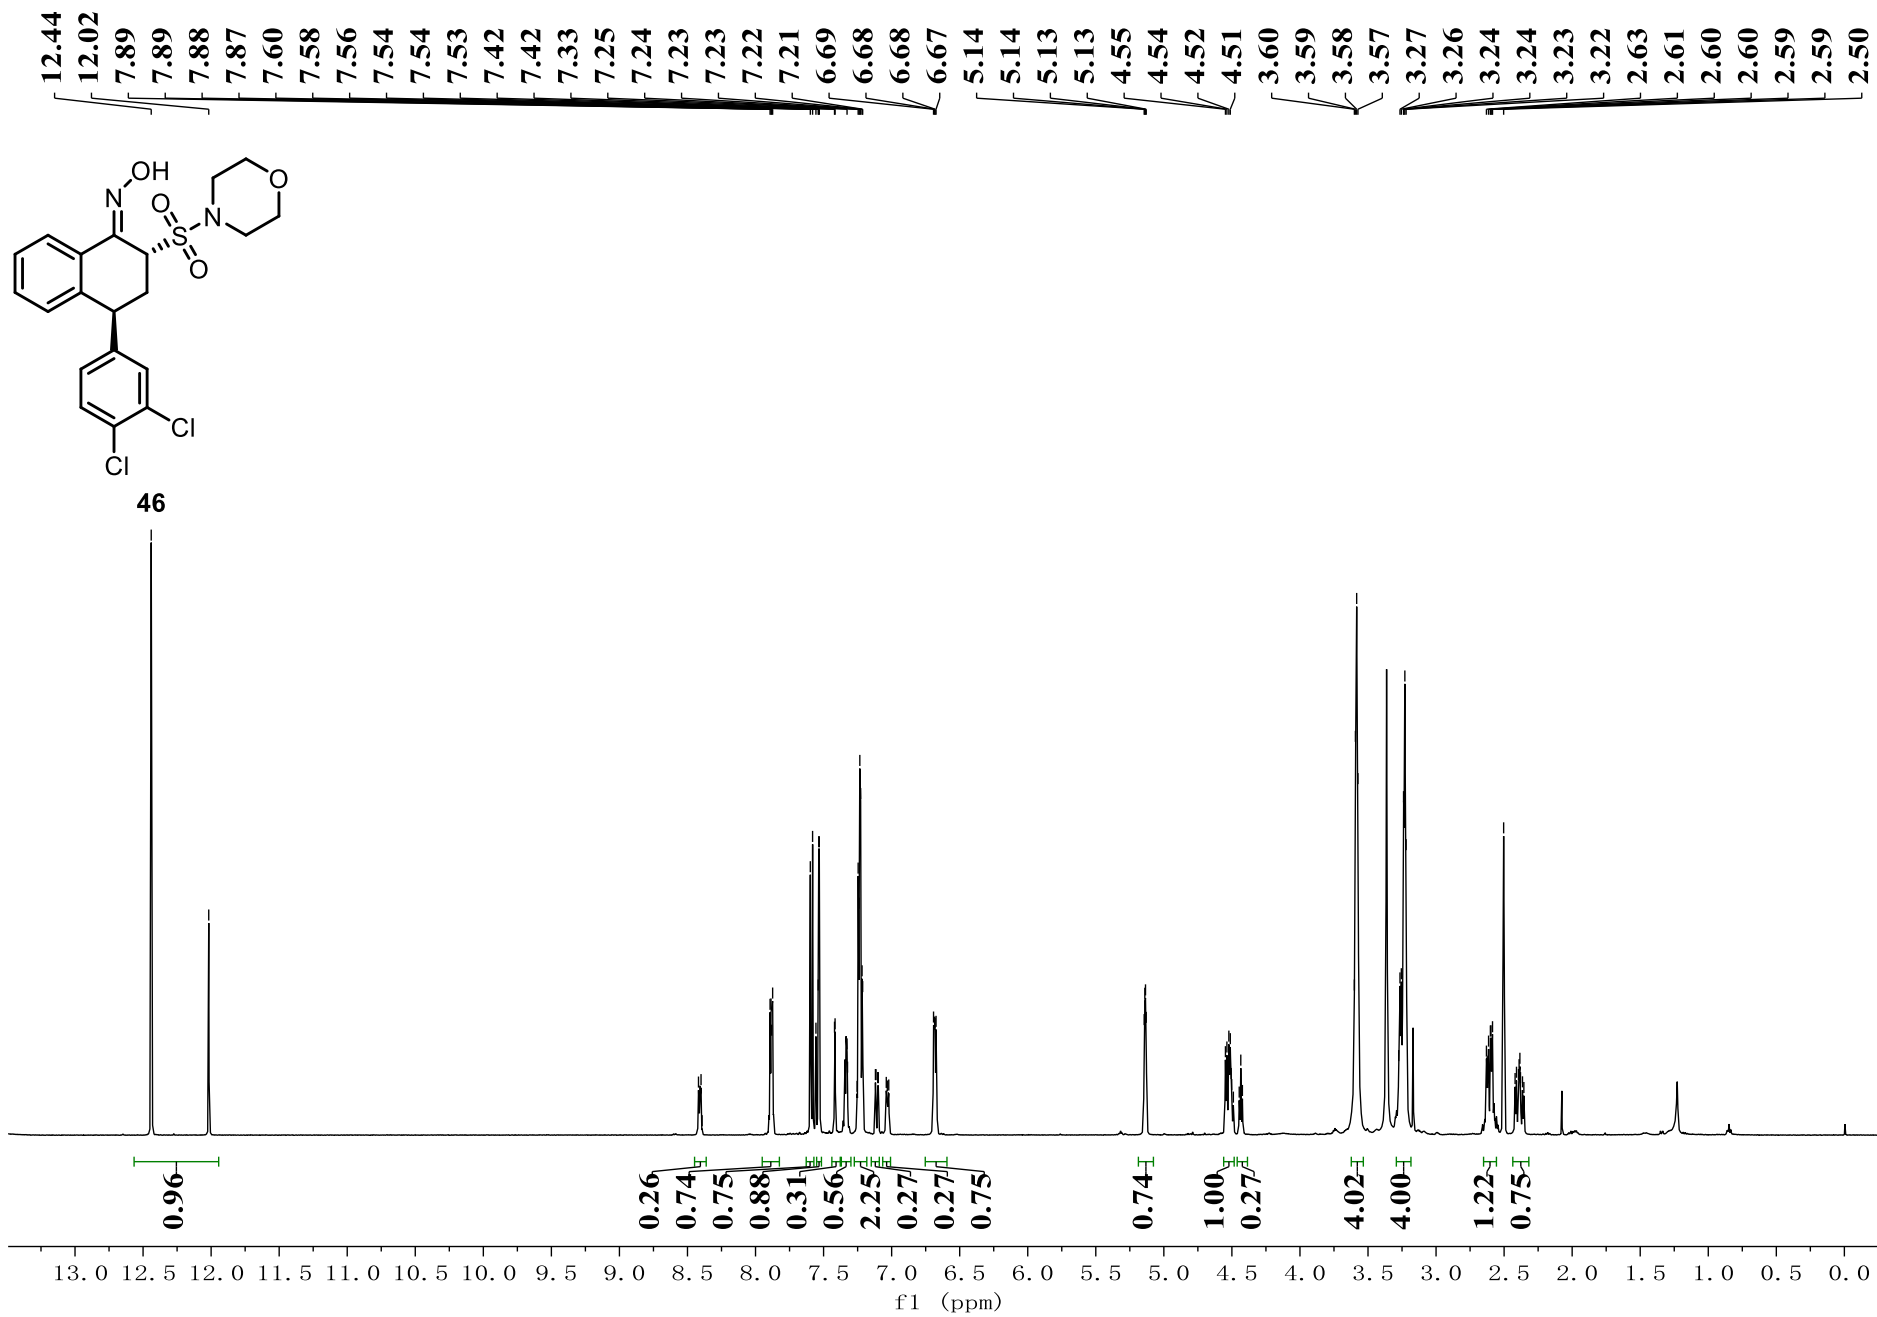

<sup>13</sup>C NMR (125 MHz, DMSO-*d*<sub>6</sub>) for 46

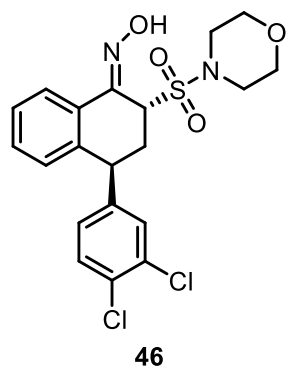

146.30  
146.18  
145.33  
143.74  
140.07  
139.38  
131.31  
131.16  
130.87  
130.68  
130.30  
130.12  
129.86  
129.51  
129.35  
129.30  
129.15  
128.69  
127.60  
126.68  
126.43  
123.84  
66.12  
60.31  
51.03  
45.98  
45.06  
41.51  
40.78  
40.02  
39.85  
39.69  
39.52  
39.35  
39.19  
39.02  
32.65  
31.45

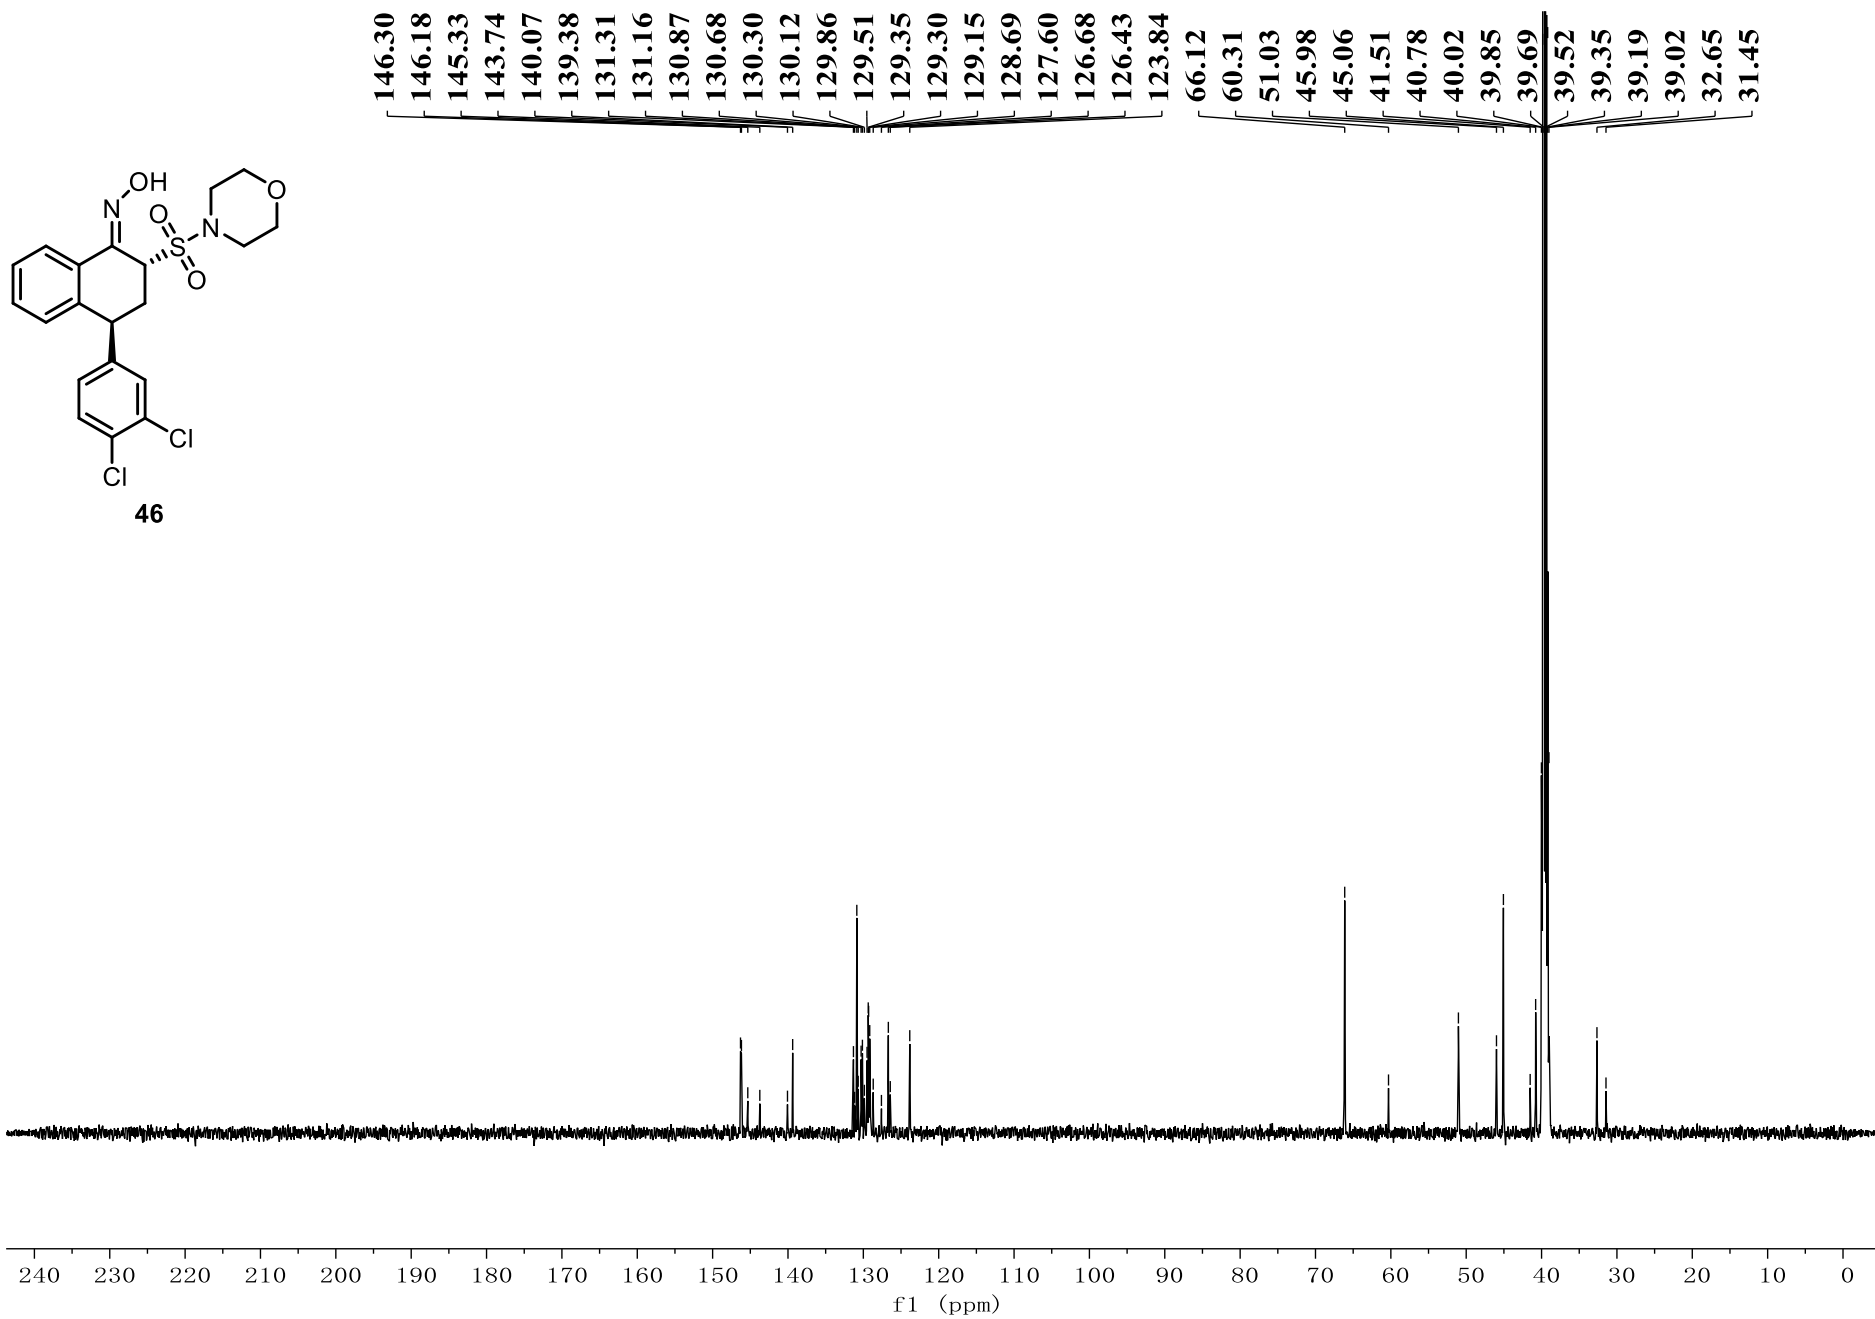

<sup>1</sup>H NMR (500 MHz, DMSO-d<sub>6</sub>:CDCl<sub>3</sub> = 2:1) for 47

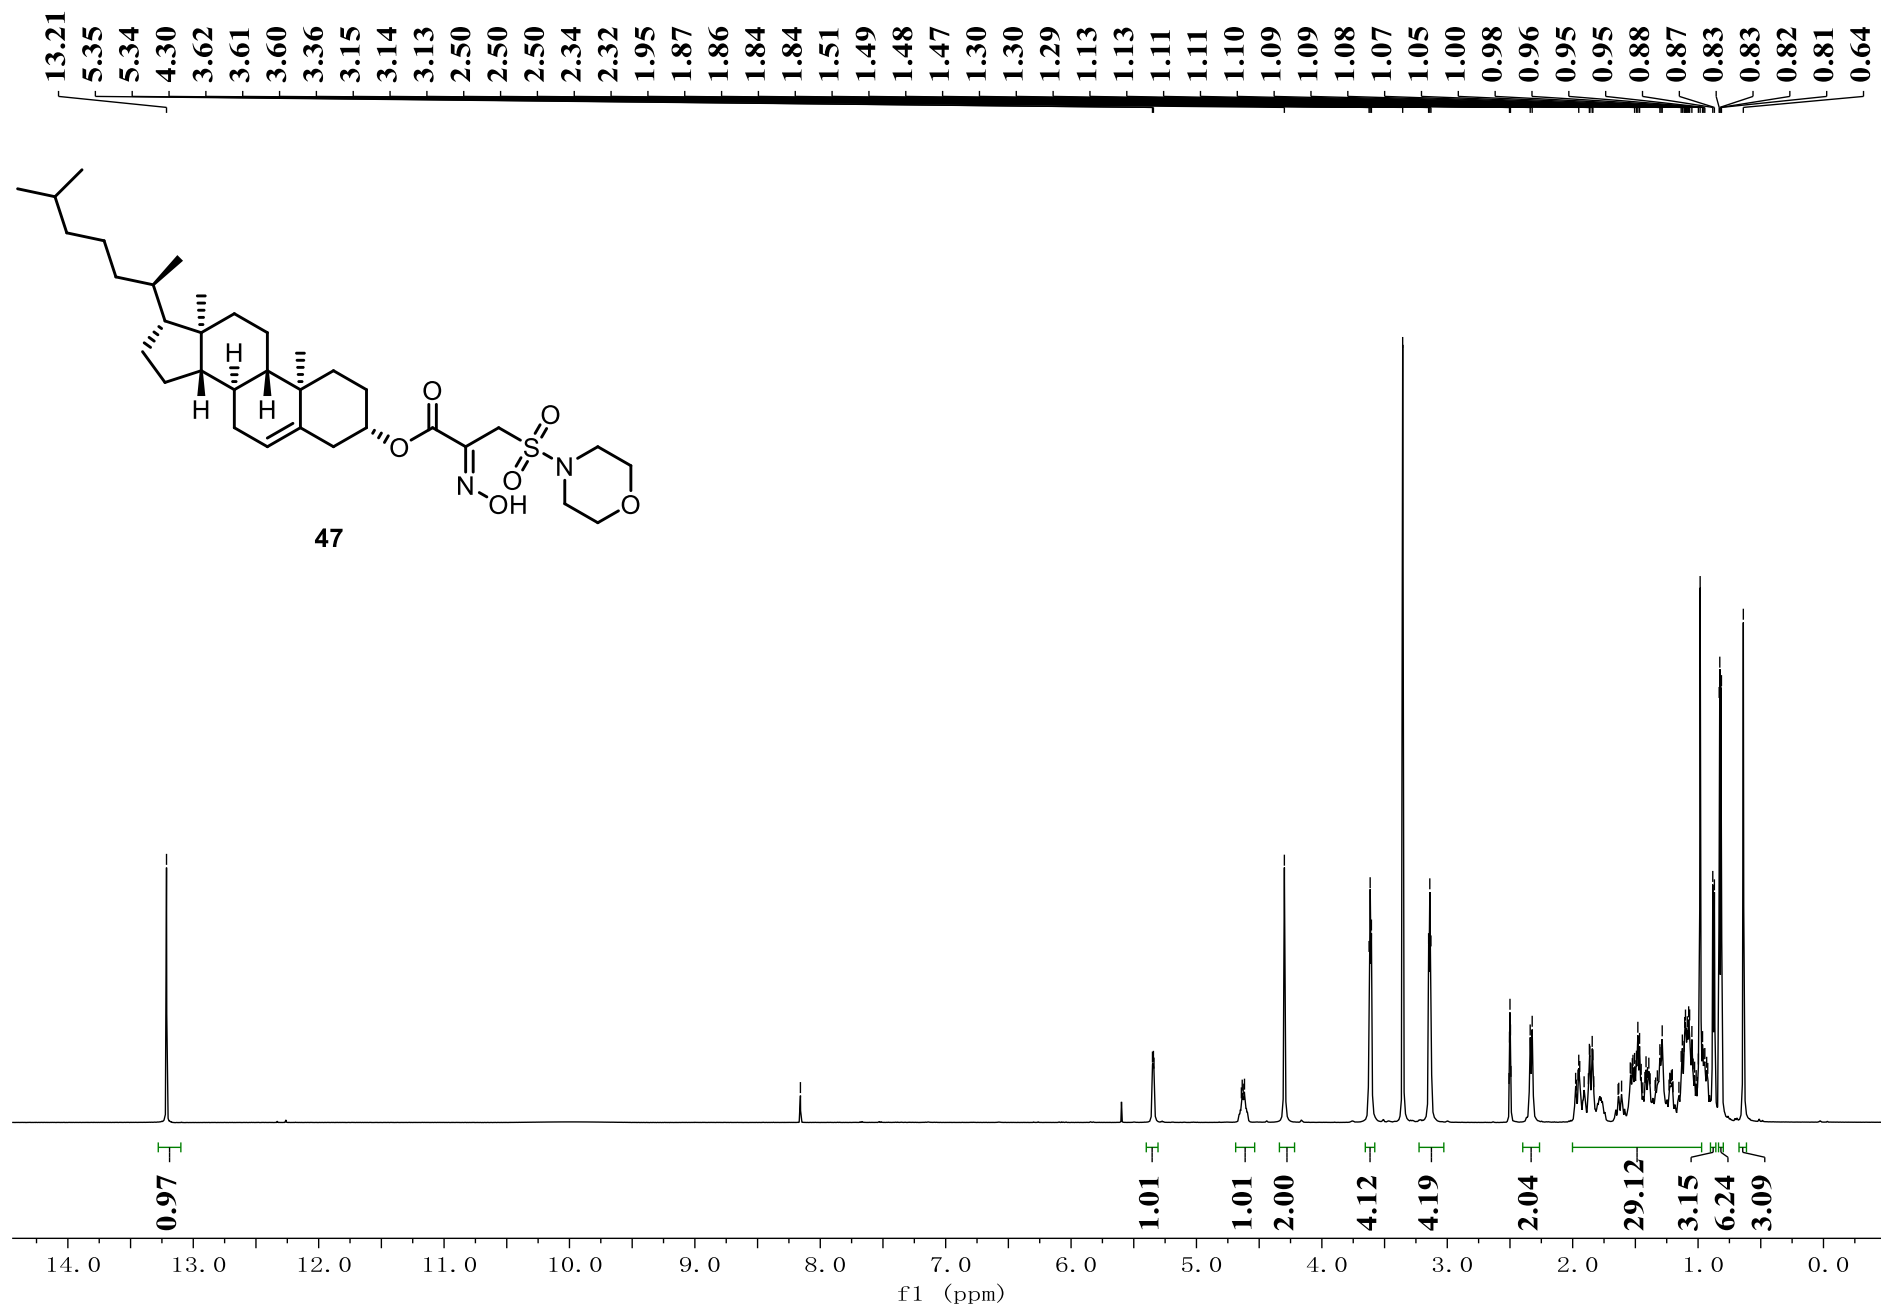

<sup>13</sup>C NMR (125 MHz, DMSO-*d*<sub>6</sub>:CDCl<sub>3</sub> = 2:1) for 47

161.72  
141.03  
138.93  
122.35  
78.96  
78.70  
78.43  
74.88  
65.78  
56.09  
55.53  
49.38  
45.03  
43.03  
41.79  
40.02  
39.85  
39.69  
39.52  
39.35  
39.18  
39.02  
38.94  
37.43  
36.39  
36.04  
35.63  
35.19  
31.34  
31.29  
27.74  
27.39  
27.16  
23.79  
23.23  
22.56  
22.29  
20.51  
18.89  
18.41  
11.54

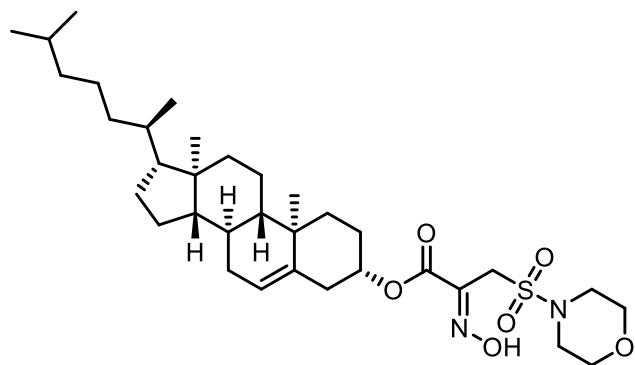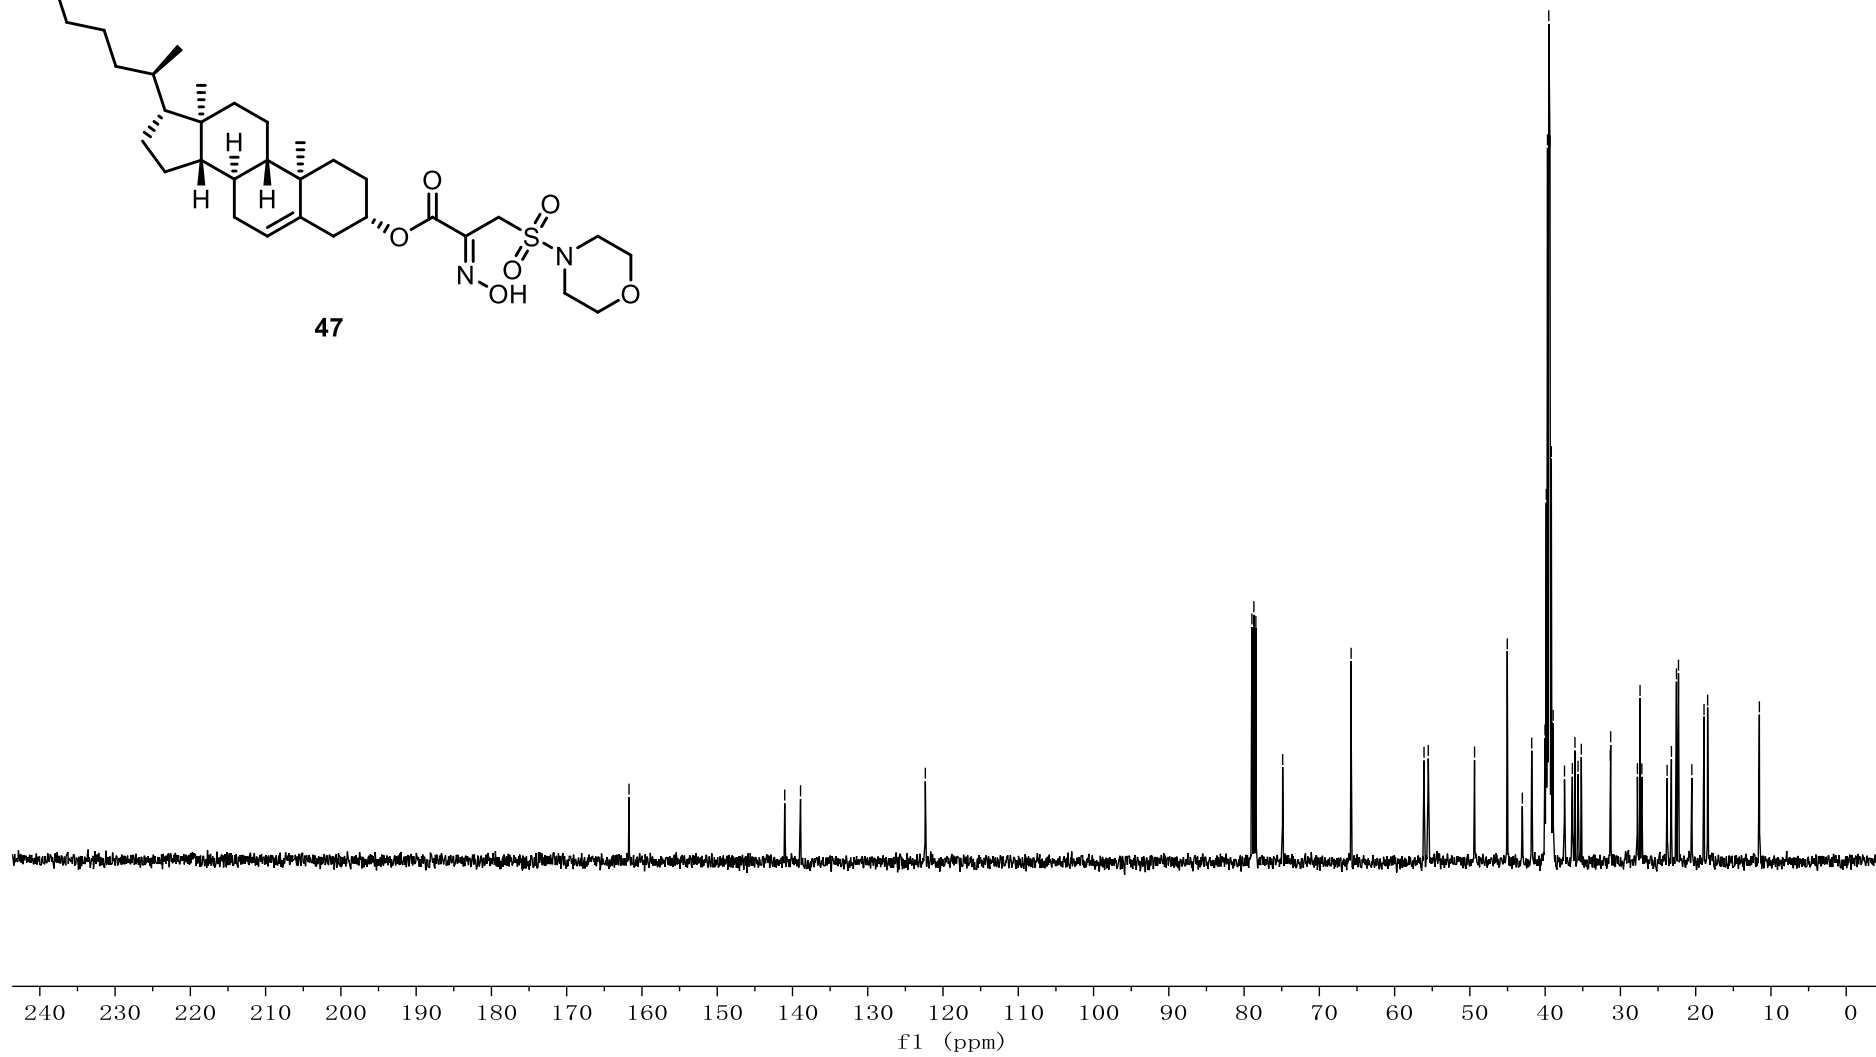

<sup>1</sup>H NMR (500 MHz, CDCl<sub>3</sub>) for 48

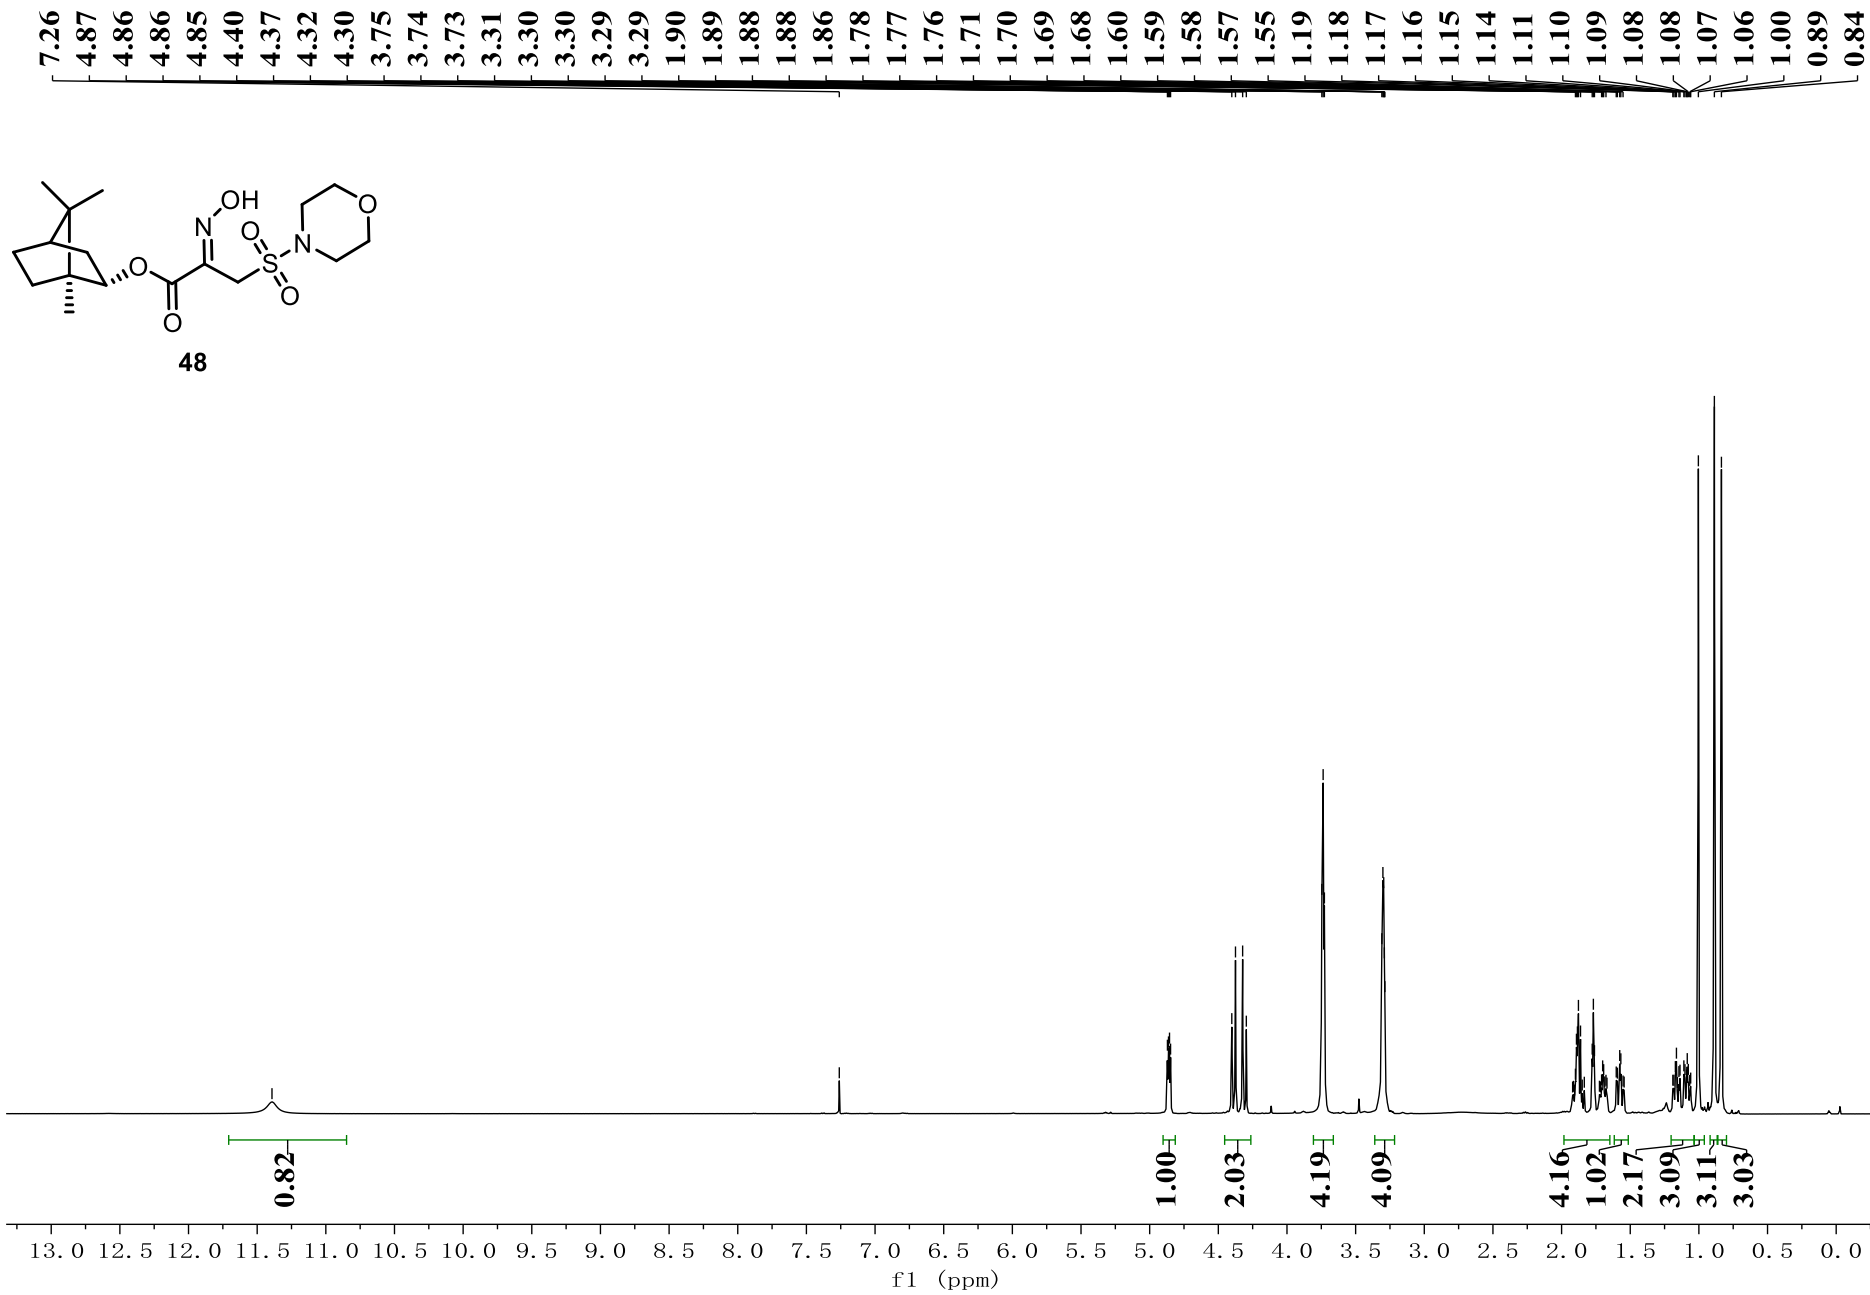

<sup>13</sup>C NMR (125 MHz, CDCl<sub>3</sub>) for 48

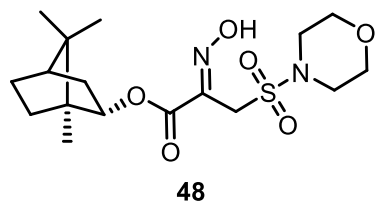

— 162.14

— 142.99

84.03

77.42

77.16

76.91

— 66.85

49.10

47.10

45.43

45.05

44.03

38.57

33.71

27.03

20.13

19.99

11.62

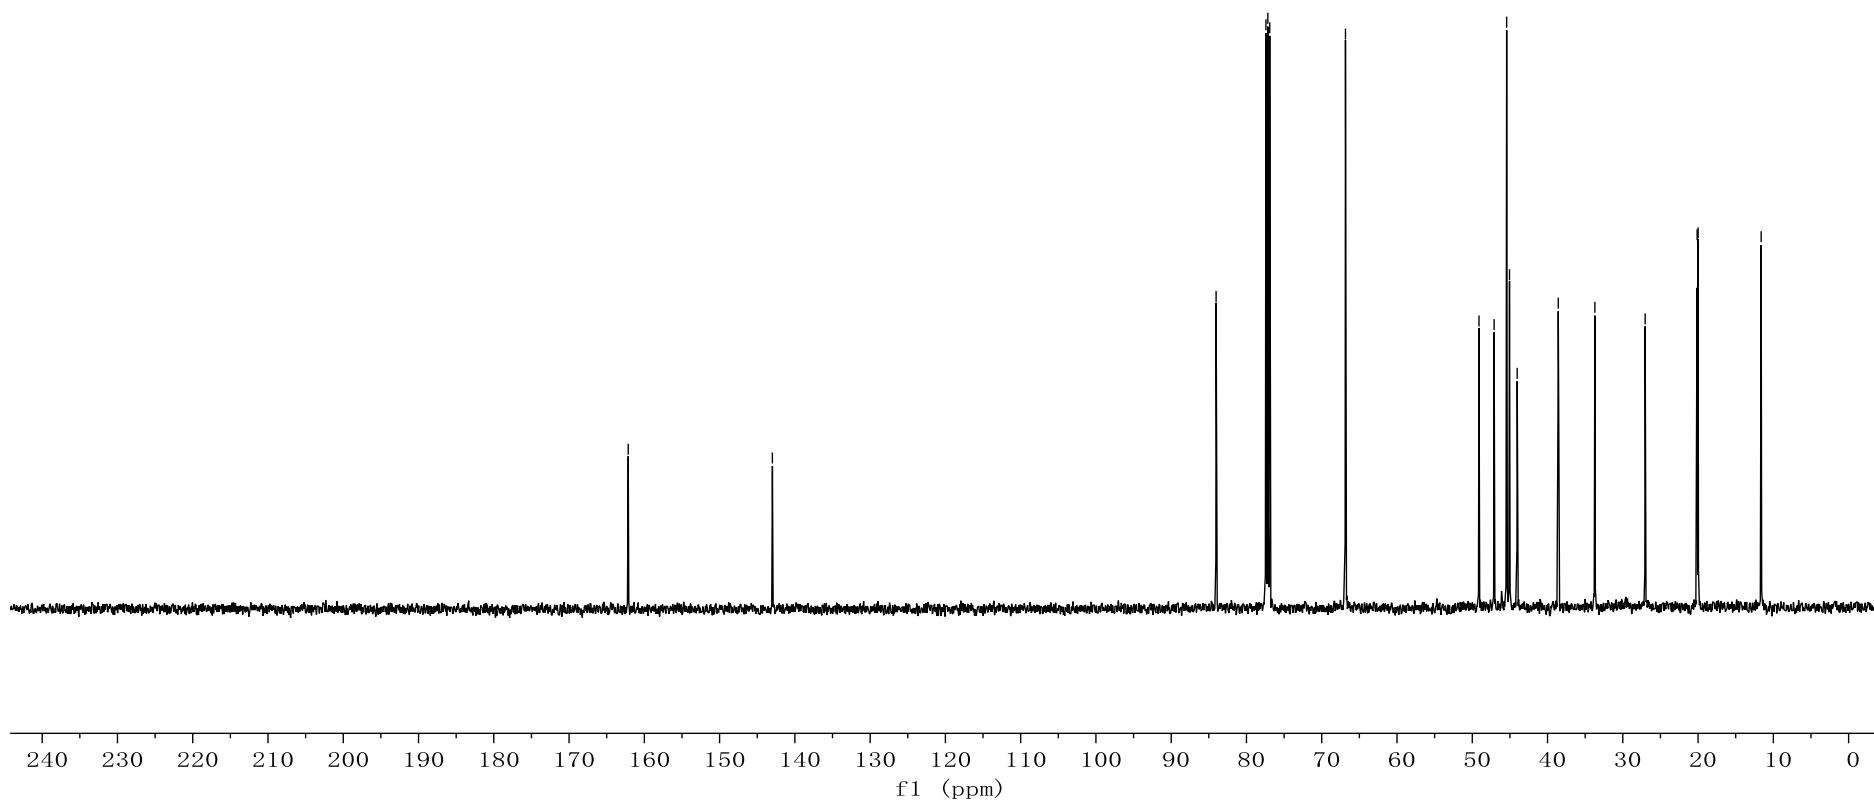

<sup>1</sup>H NMR (500 MHz, CDCl<sub>3</sub>) for 49

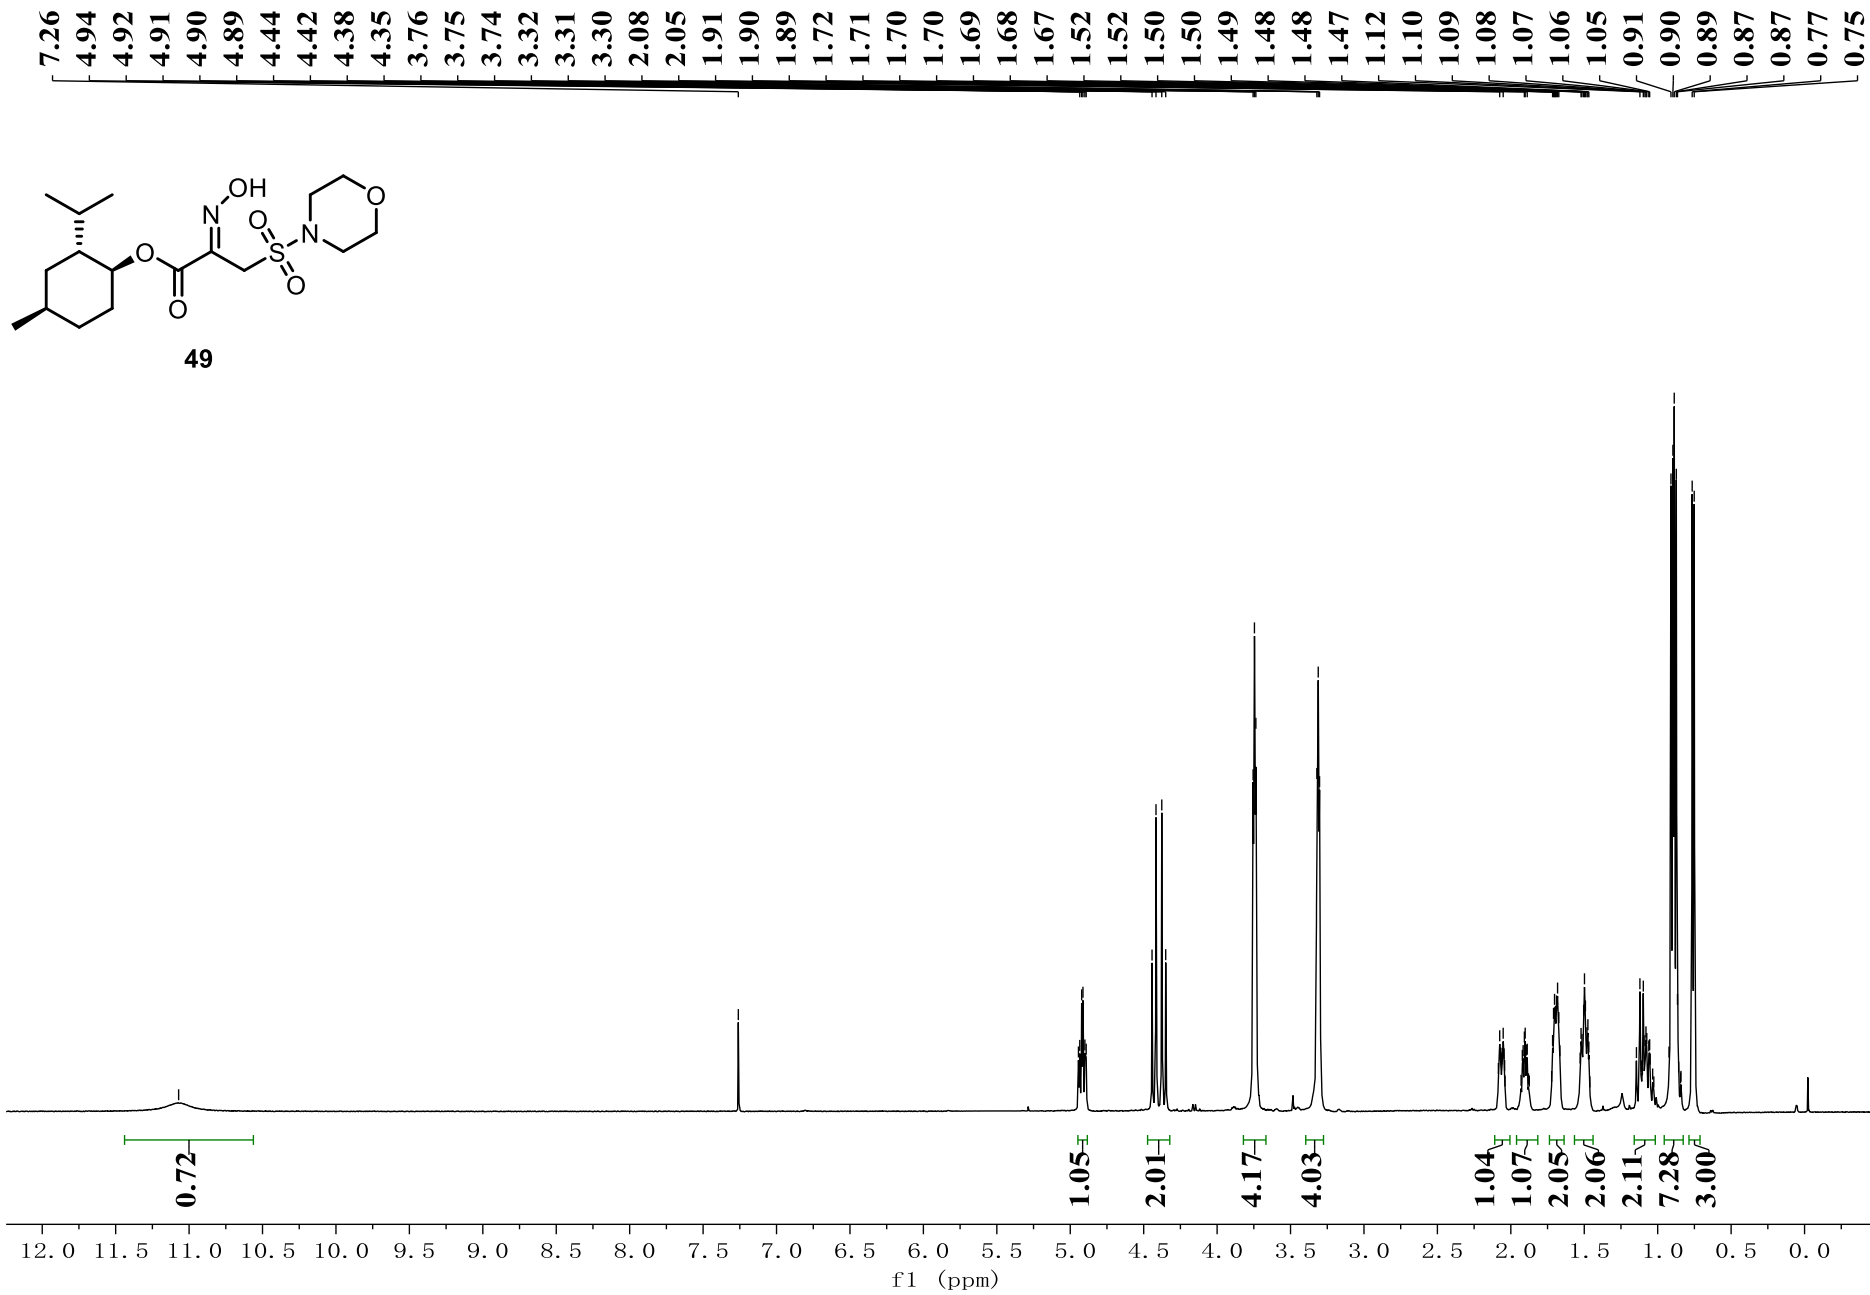



<sup>13</sup>C NMR (125 MHz, CDCl<sub>3</sub>) for 49

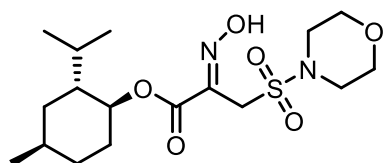

49

— 162.20

— 142.94

77.41  
77.16  
76.91  
— 66.82

46.93  
45.49  
43.96  
40.48  
34.13  
31.54  
26.22  
23.38  
22.06  
20.83  
16.28

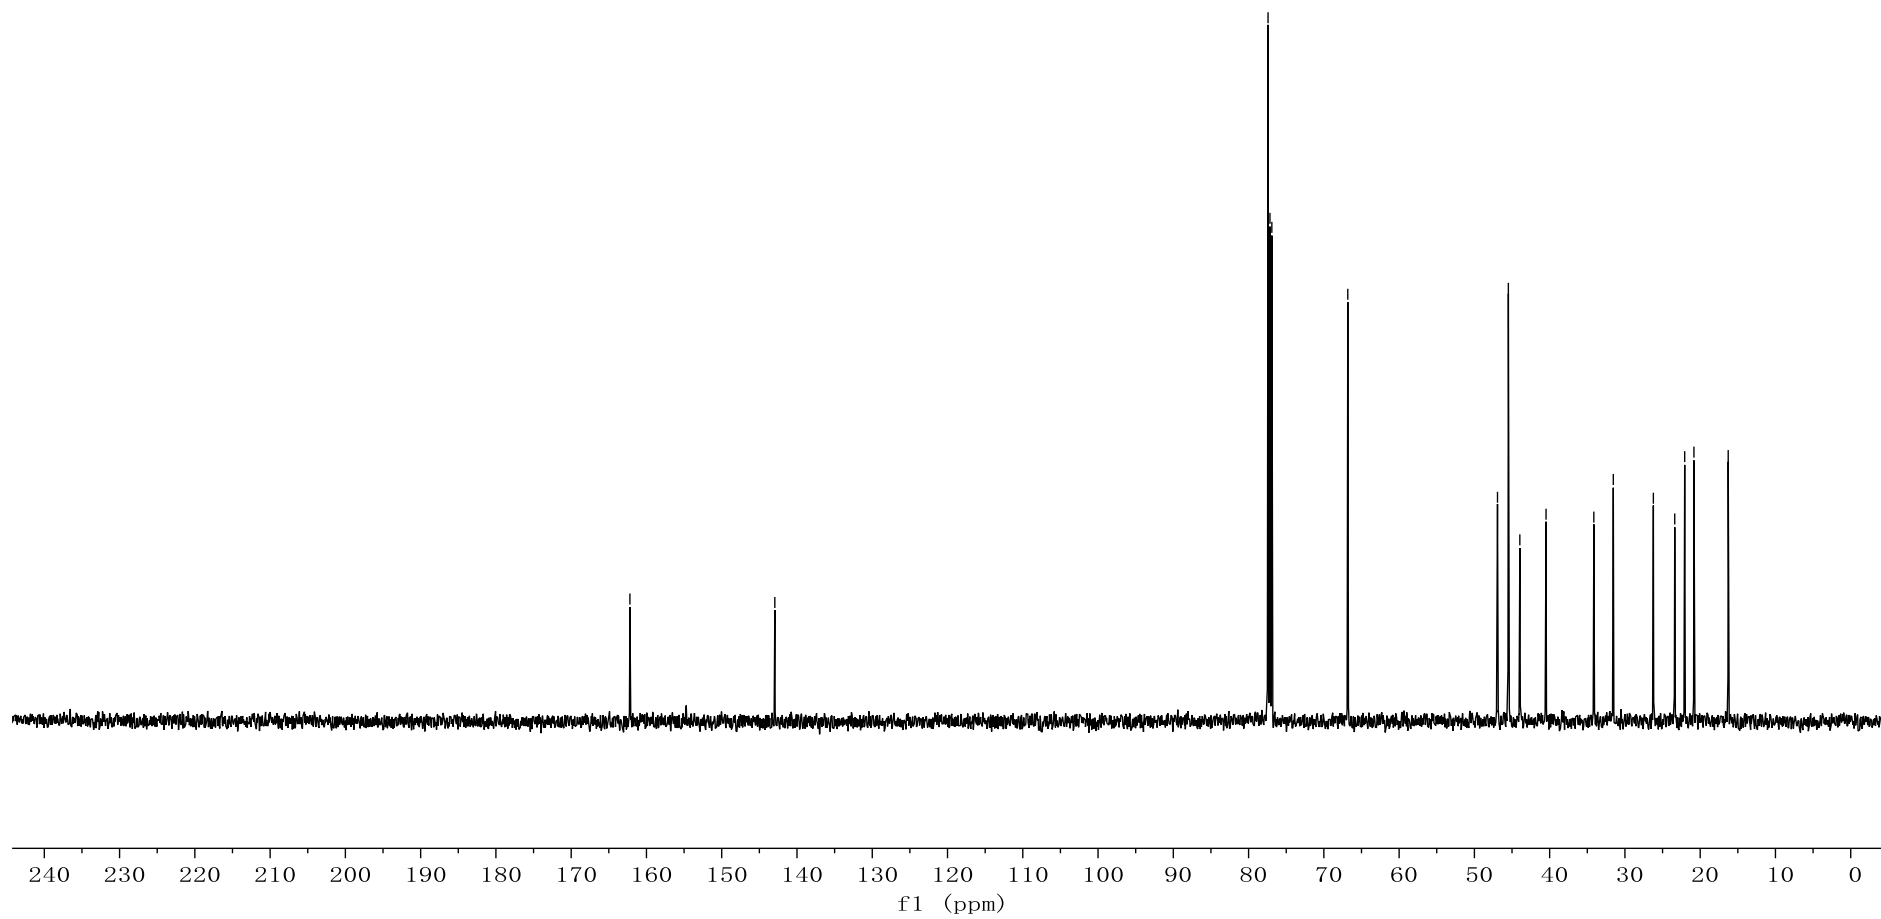

<sup>1</sup>H NMR (500 MHz, CDCl<sub>3</sub>) for 50

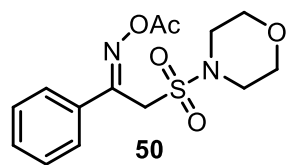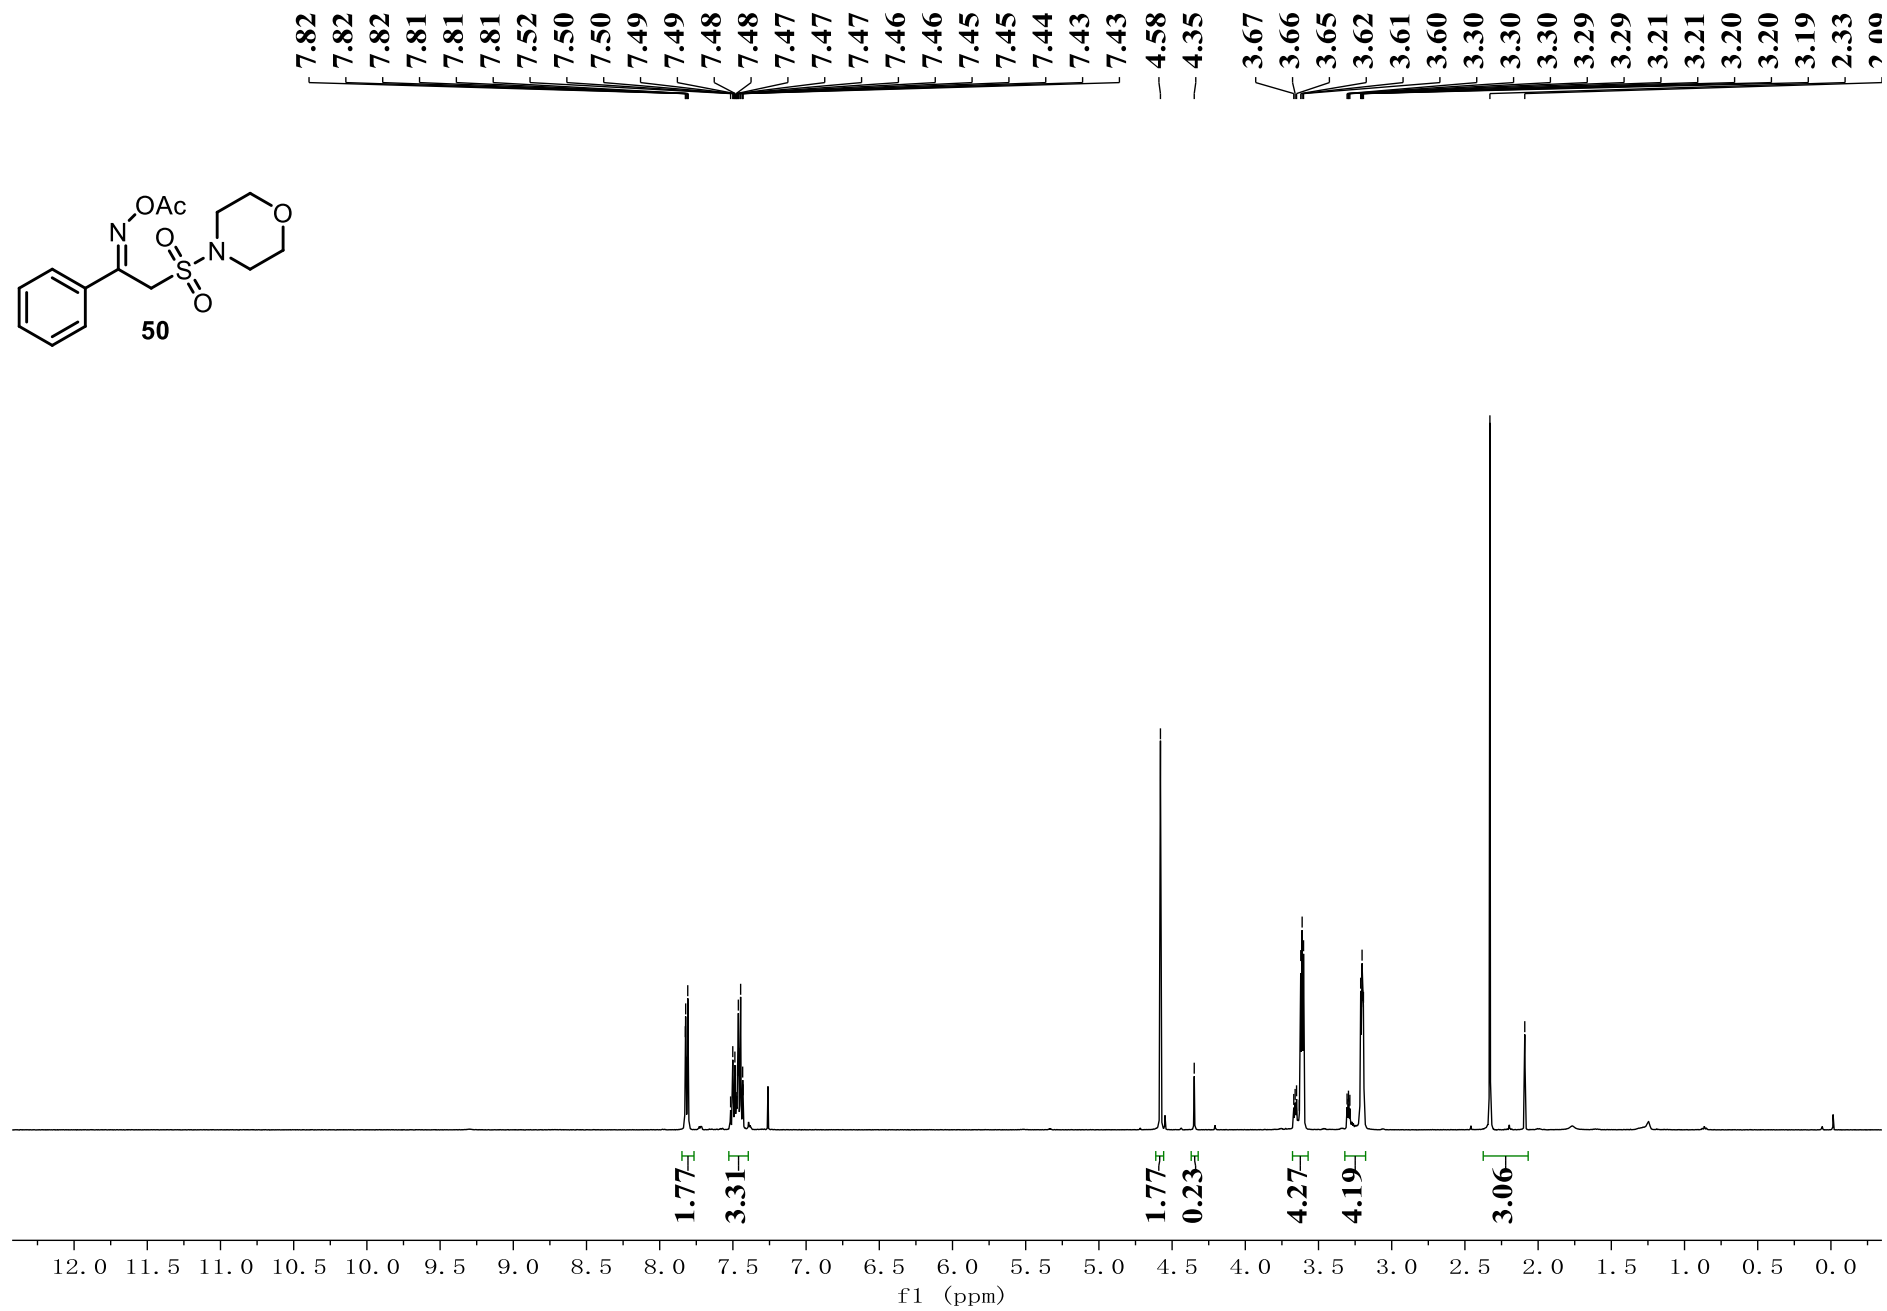

<sup>13</sup>C NMR (125 MHz, CDCl<sub>3</sub>) for 50

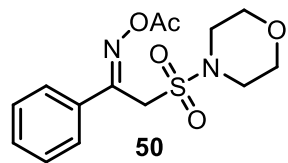

— 168.25  
— 154.28  
132.47  
131.62  
130.74  
129.02  
128.60  
128.22  
127.66  
77.41  
77.16  
76.91  
66.63  
66.52  
55.58  
47.90  
46.07  
45.84  
19.98  
19.54

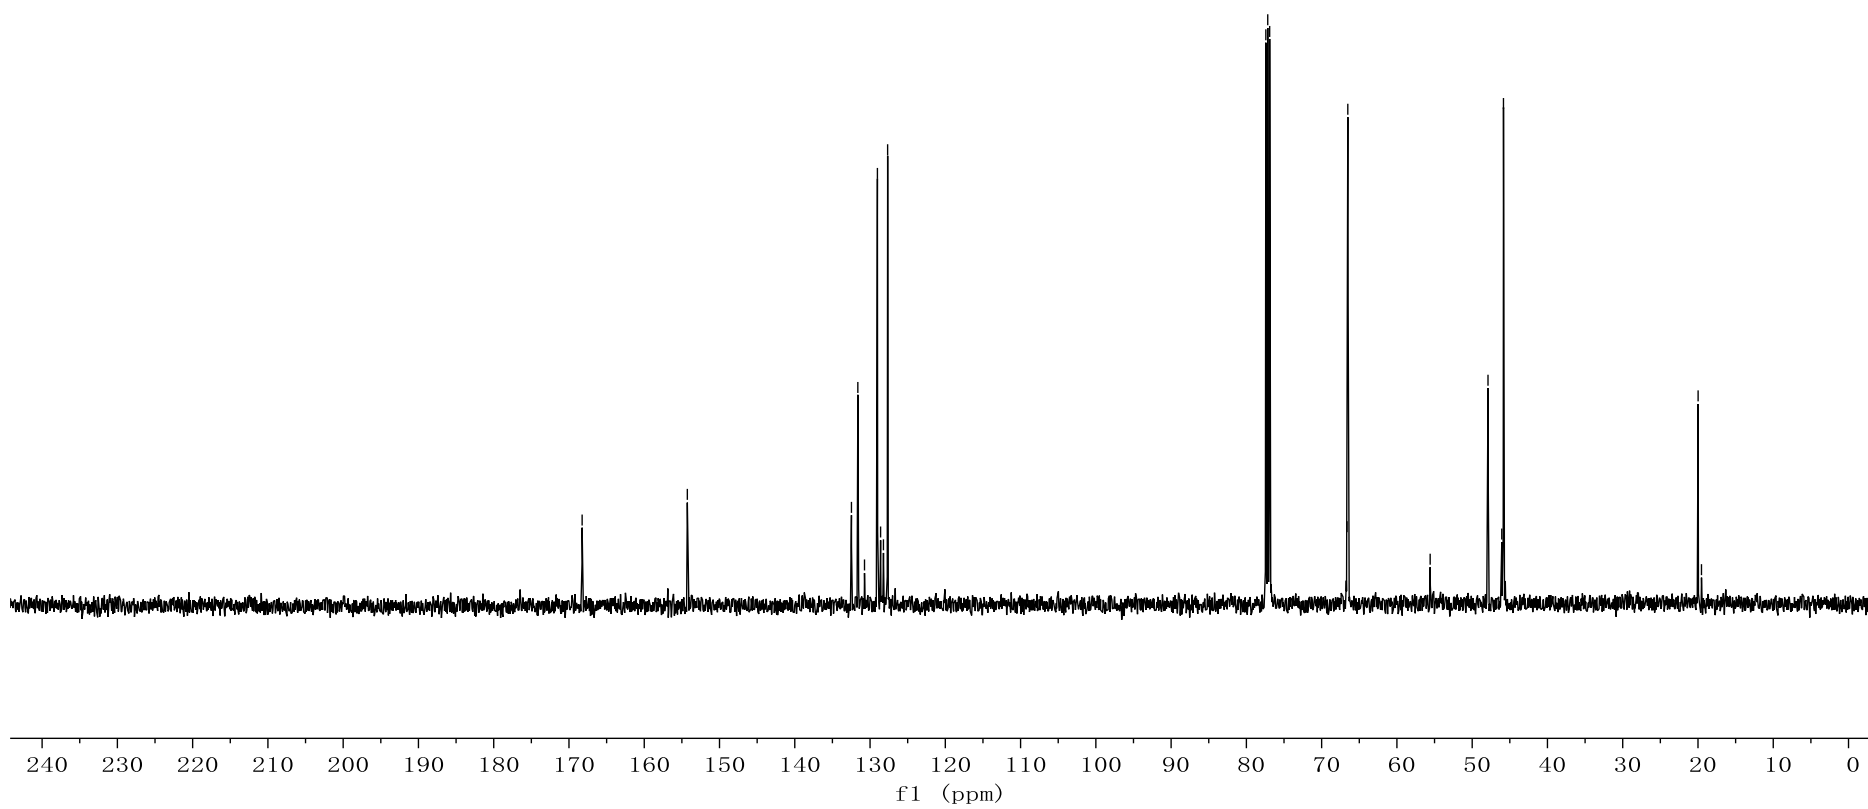

<sup>1</sup>H NMR (500 MHz, CDCl<sub>3</sub>) for 51

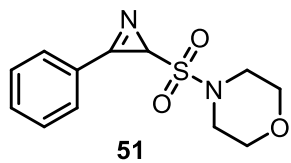

7.99  
7.98  
7.98  
7.97  
7.97  
7.72  
7.71  
7.71  
7.70  
7.70  
7.70  
7.69  
7.68  
7.68  
7.63  
7.63  
7.62  
7.61  
7.61  
7.60  
7.60  
7.60  
3.78  
3.77  
3.76  
3.57  
3.53  
3.52  
3.52  
3.51  
3.51  
3.50  
3.49  
3.45  
3.44  
3.43  
3.43  
3.43  
3.42  
3.42  
3.41

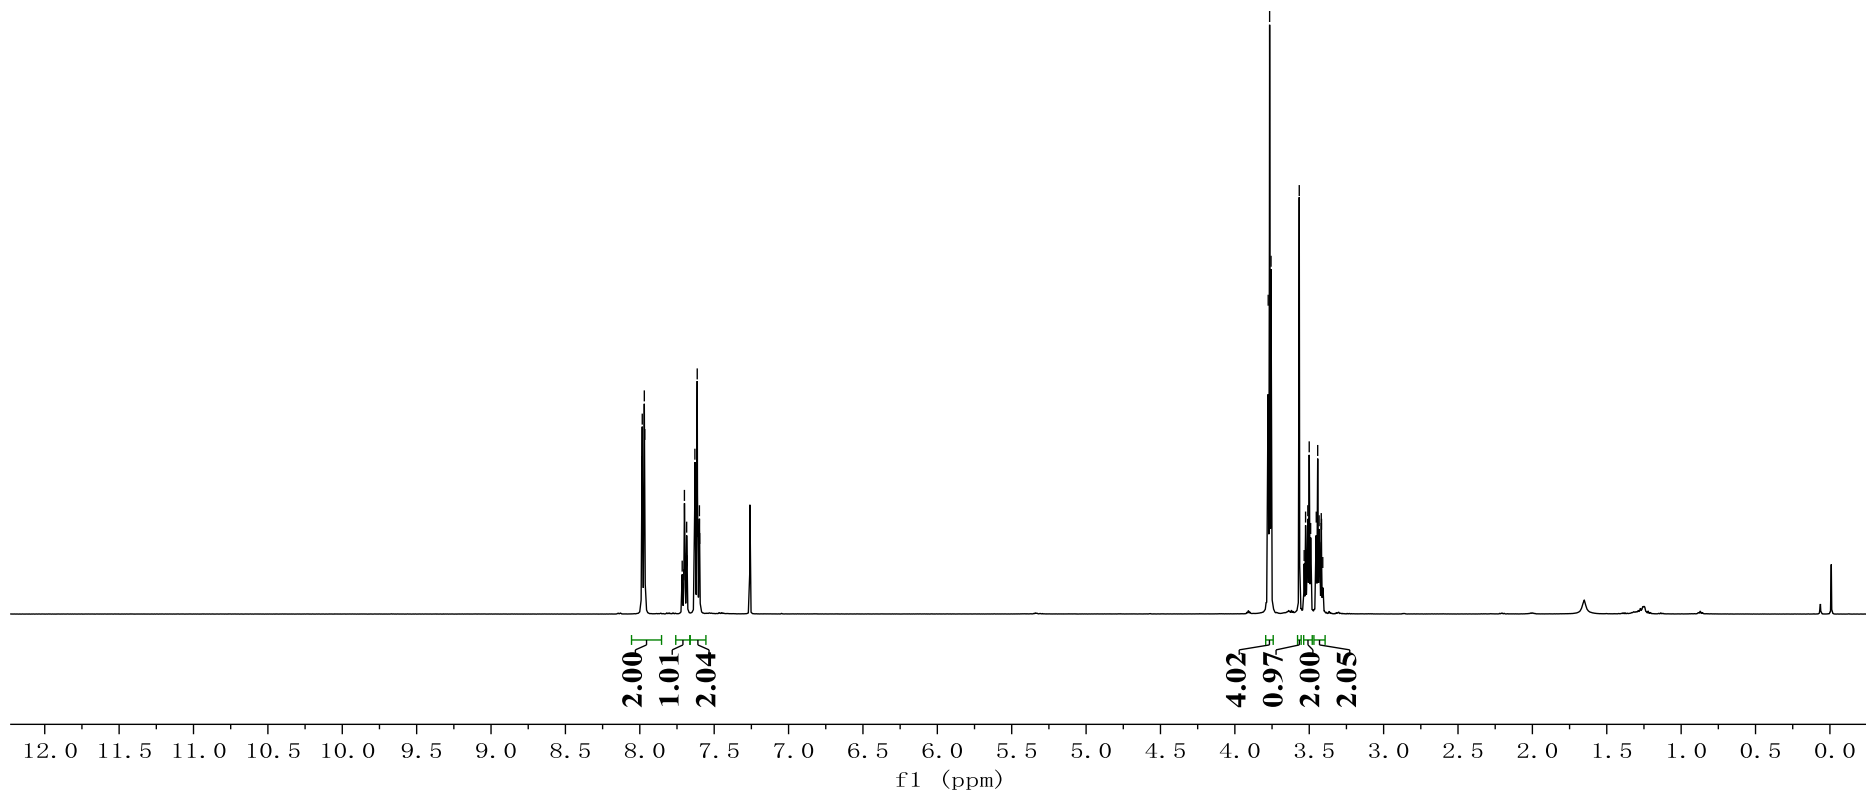

<sup>13</sup>C NMR (125 MHz, CDCl<sub>3</sub>) for 51

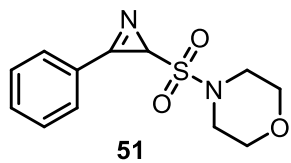

— 161.48

~ 135.01

~ 131.09

~ 129.68

~ 121.44

{ 77.41

{ 77.16

{ 76.91

— 66.73

~ 46.42

~ 43.31

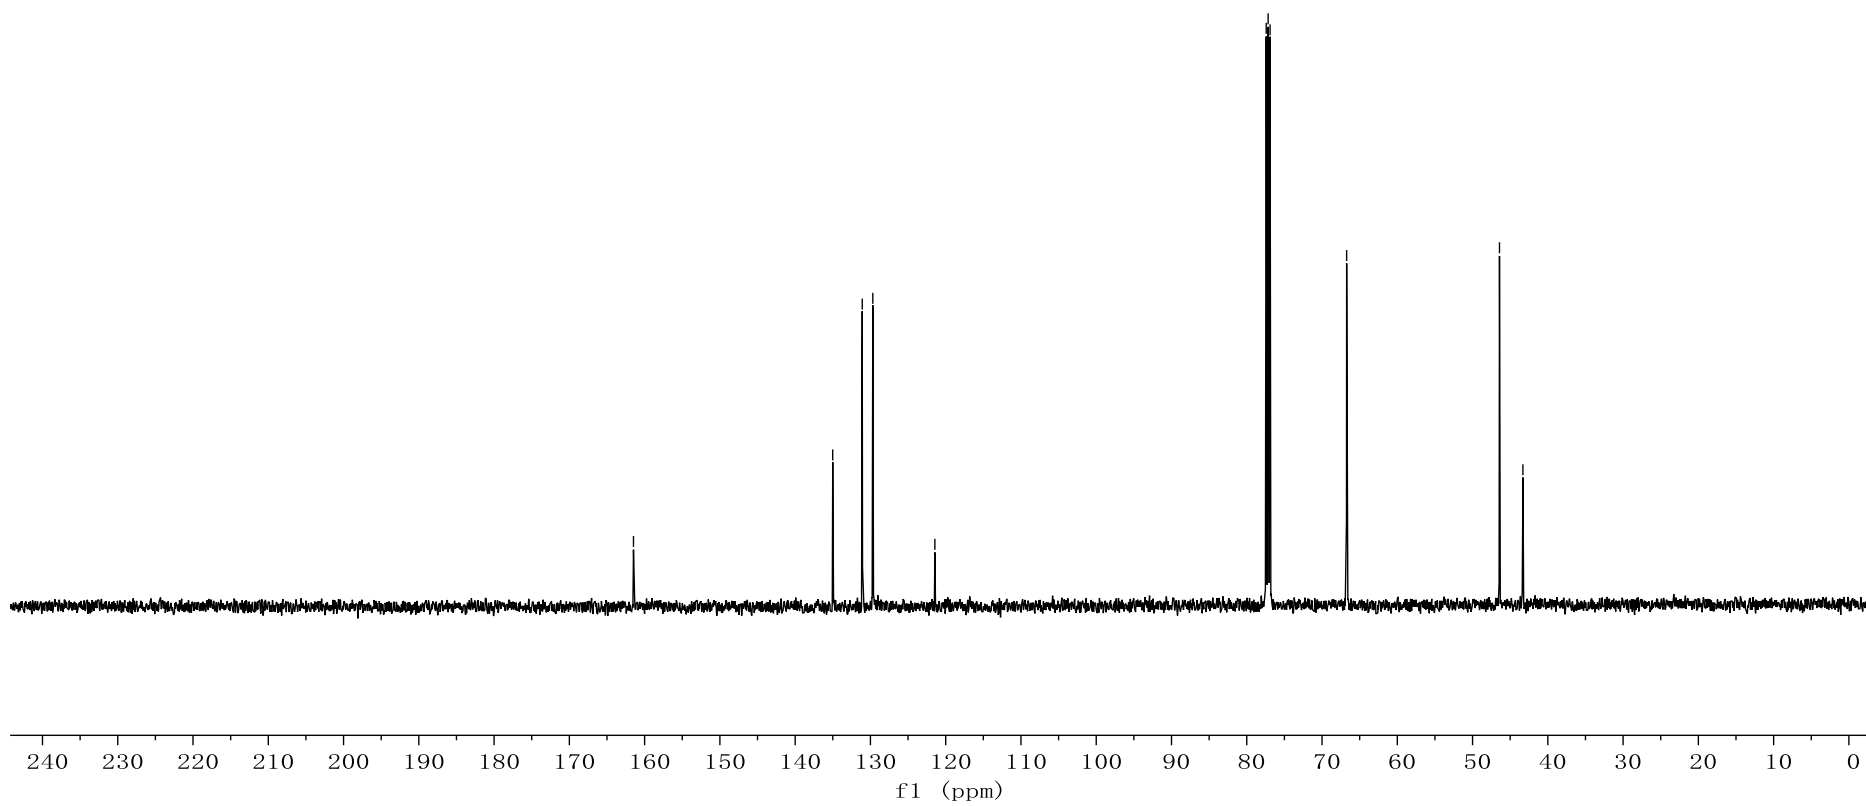

<sup>1</sup>H NMR (500 MHz, CDCl<sub>3</sub>) for 52

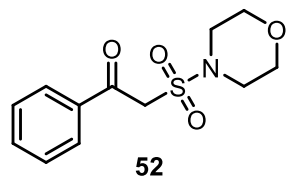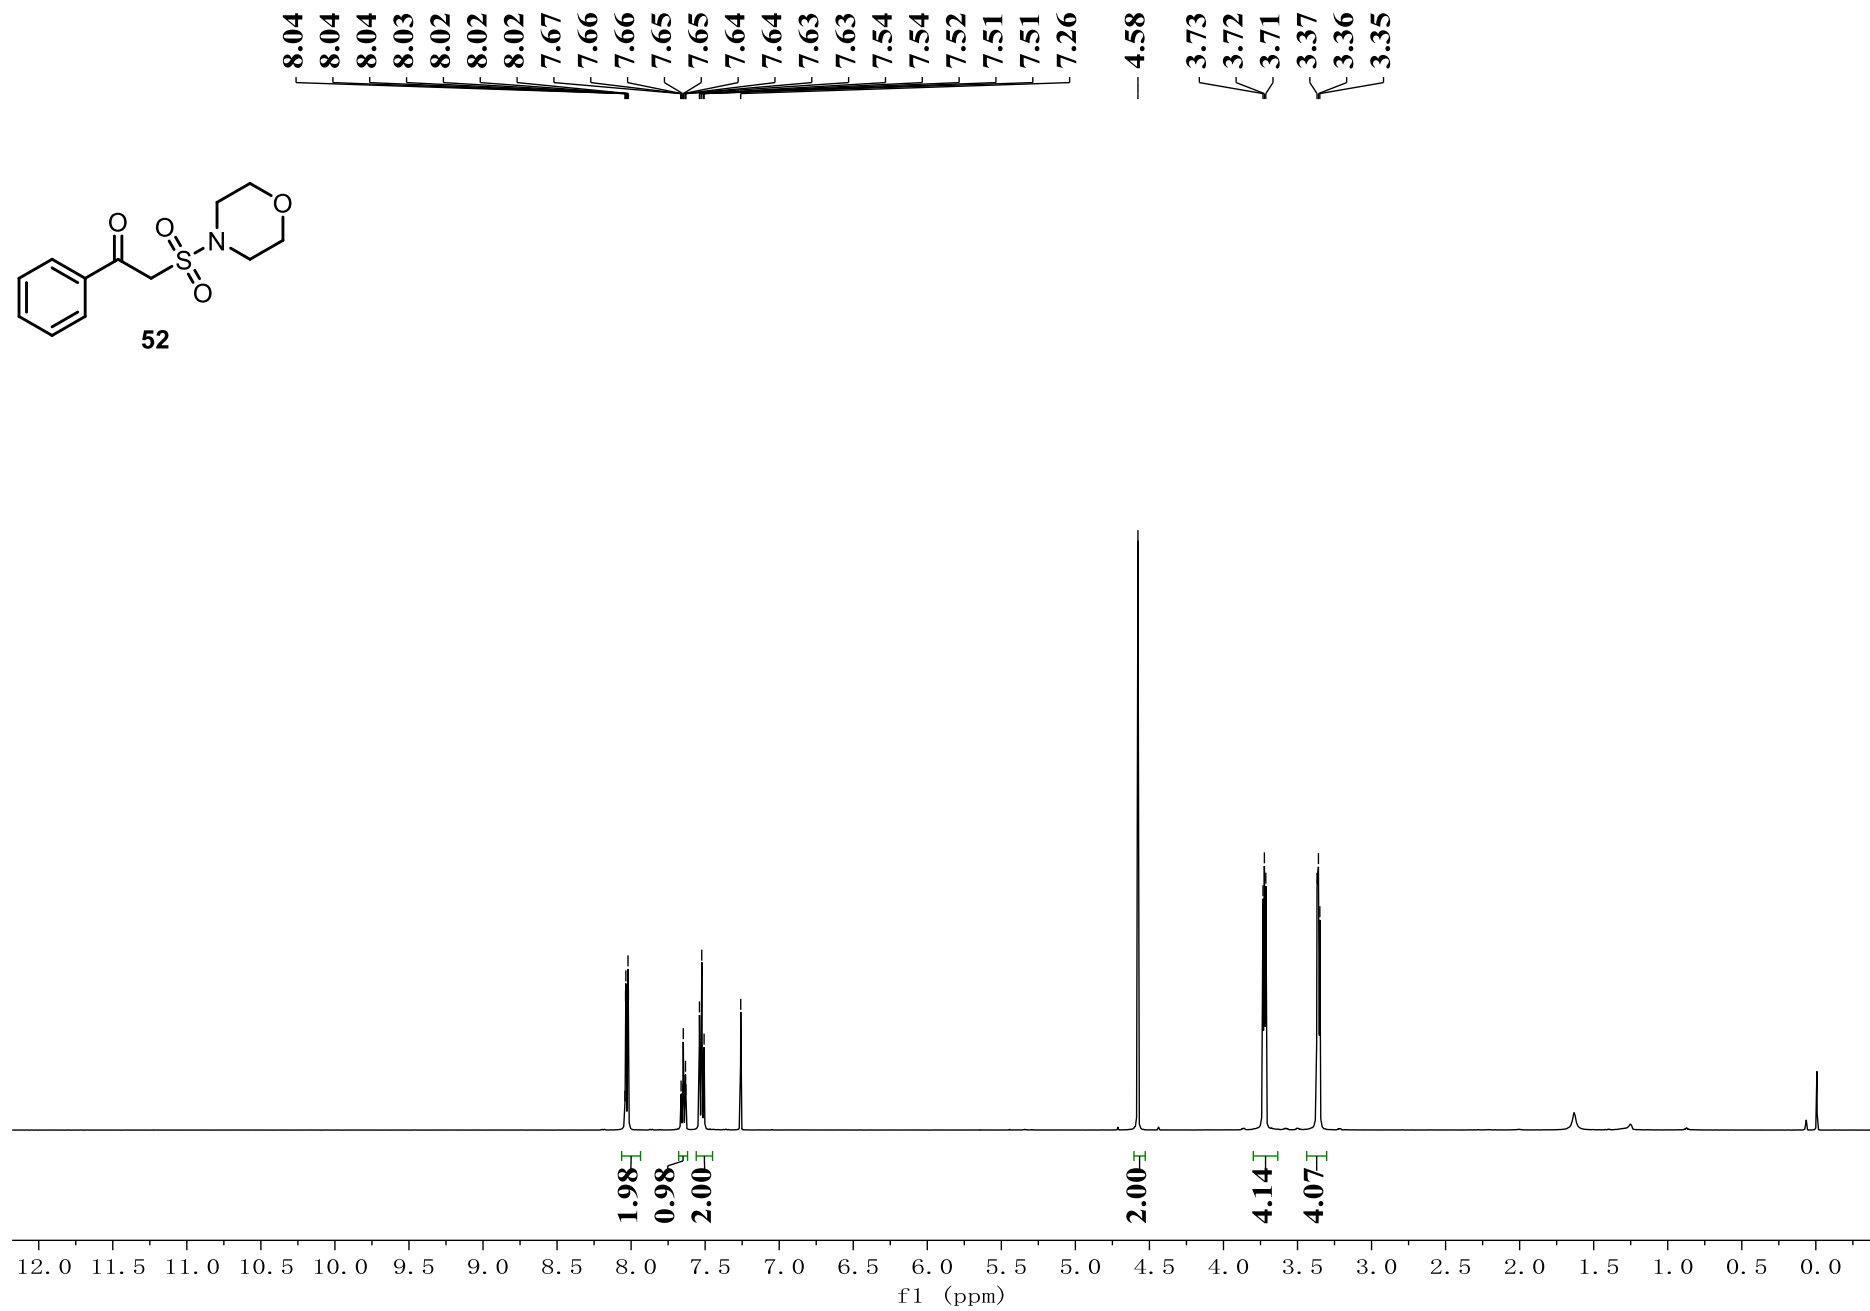

<sup>13</sup>C NMR (125 MHz, CDCl<sub>3</sub>) for 52

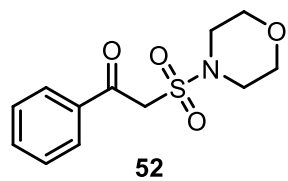

— 189.18

└ 135.83  
└ 134.63  
└ 129.53  
└ 129.09

└ 77.41  
└ 77.16  
└ 76.91  
— 66.70  
— 57.39  
— 46.32

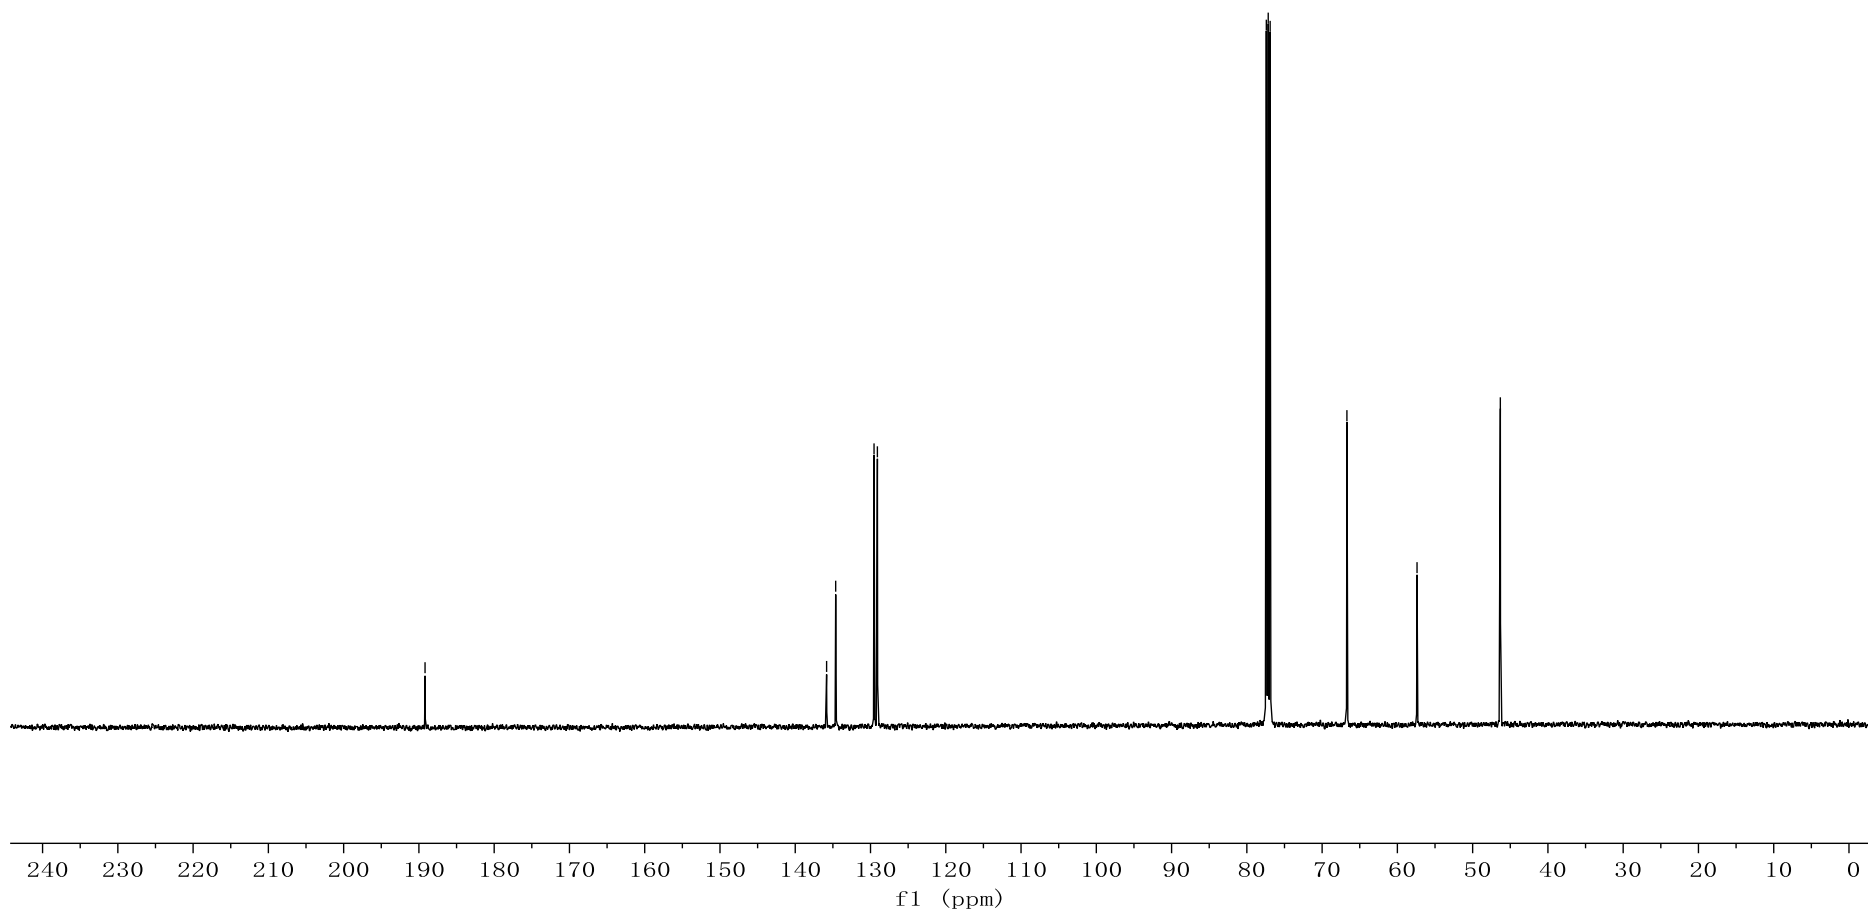

<sup>1</sup>H NMR (500 MHz, CDCl<sub>3</sub>) for 53

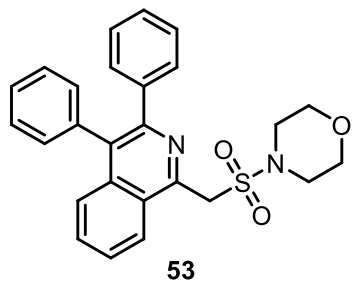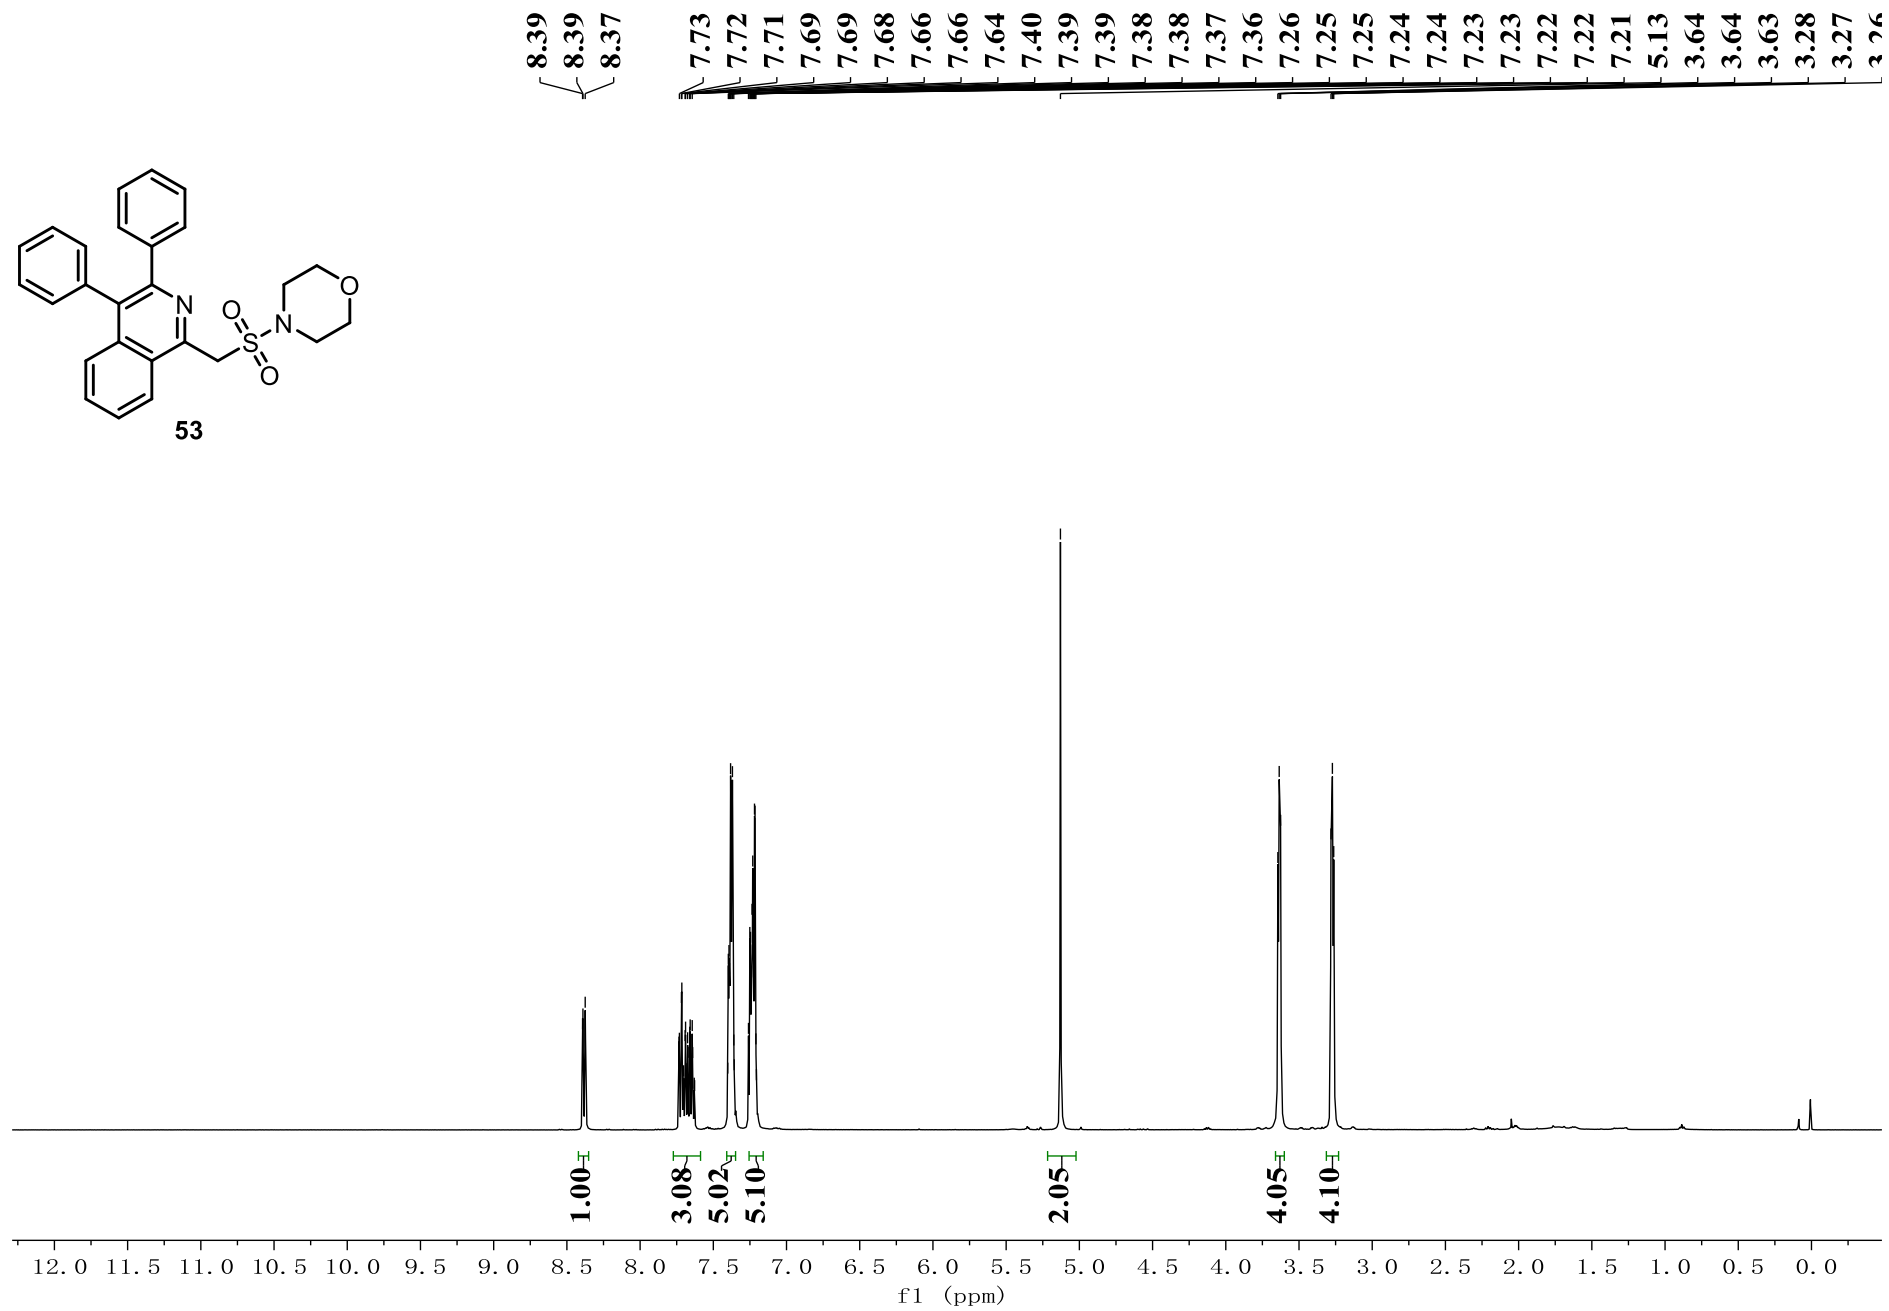



<sup>13</sup>C NMR (125 MHz, CDCl<sub>3</sub>) for 53

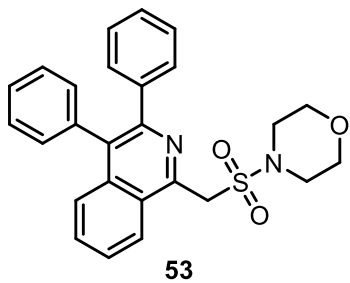

149.91  
148.94  
140.22  
136.91  
136.86  
131.96  
131.29  
130.73  
130.23  
128.48  
127.87  
127.69  
127.49  
126.75  
126.46  
126.00

77.41  
77.16  
76.91  
66.73  
56.75  
46.16

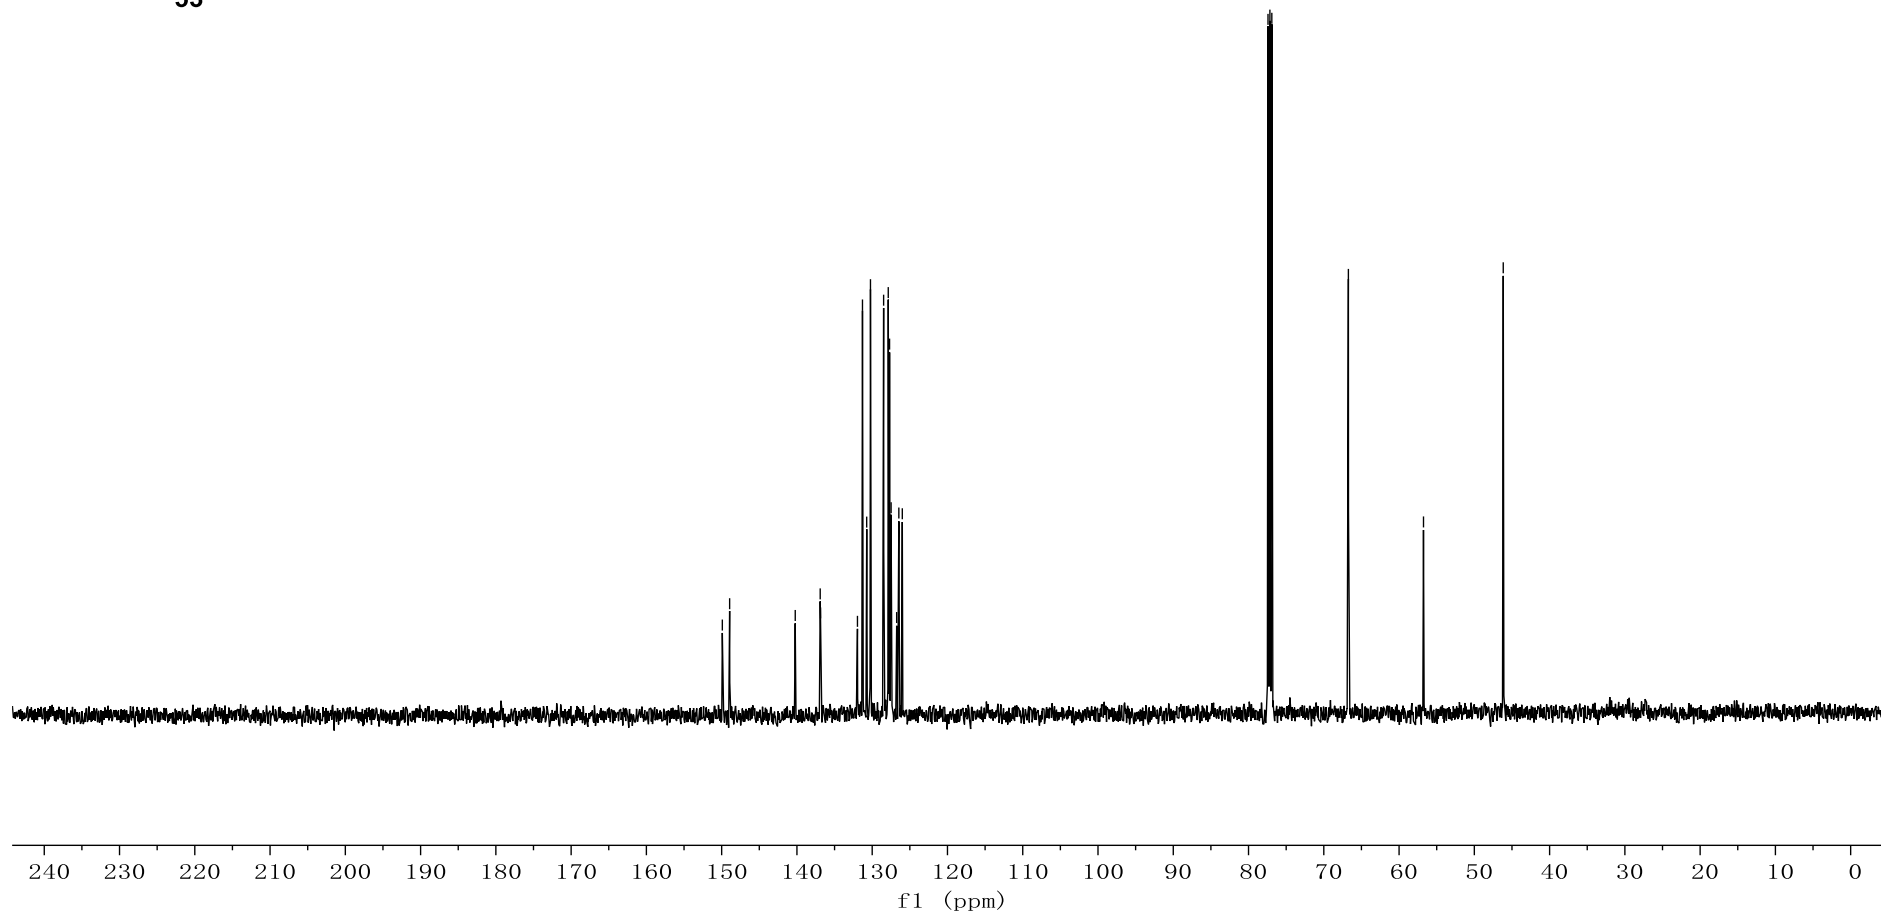

<sup>1</sup>H NMR (500 MHz, DMSO-d<sub>6</sub>) for 54

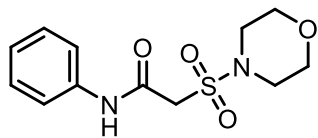

54

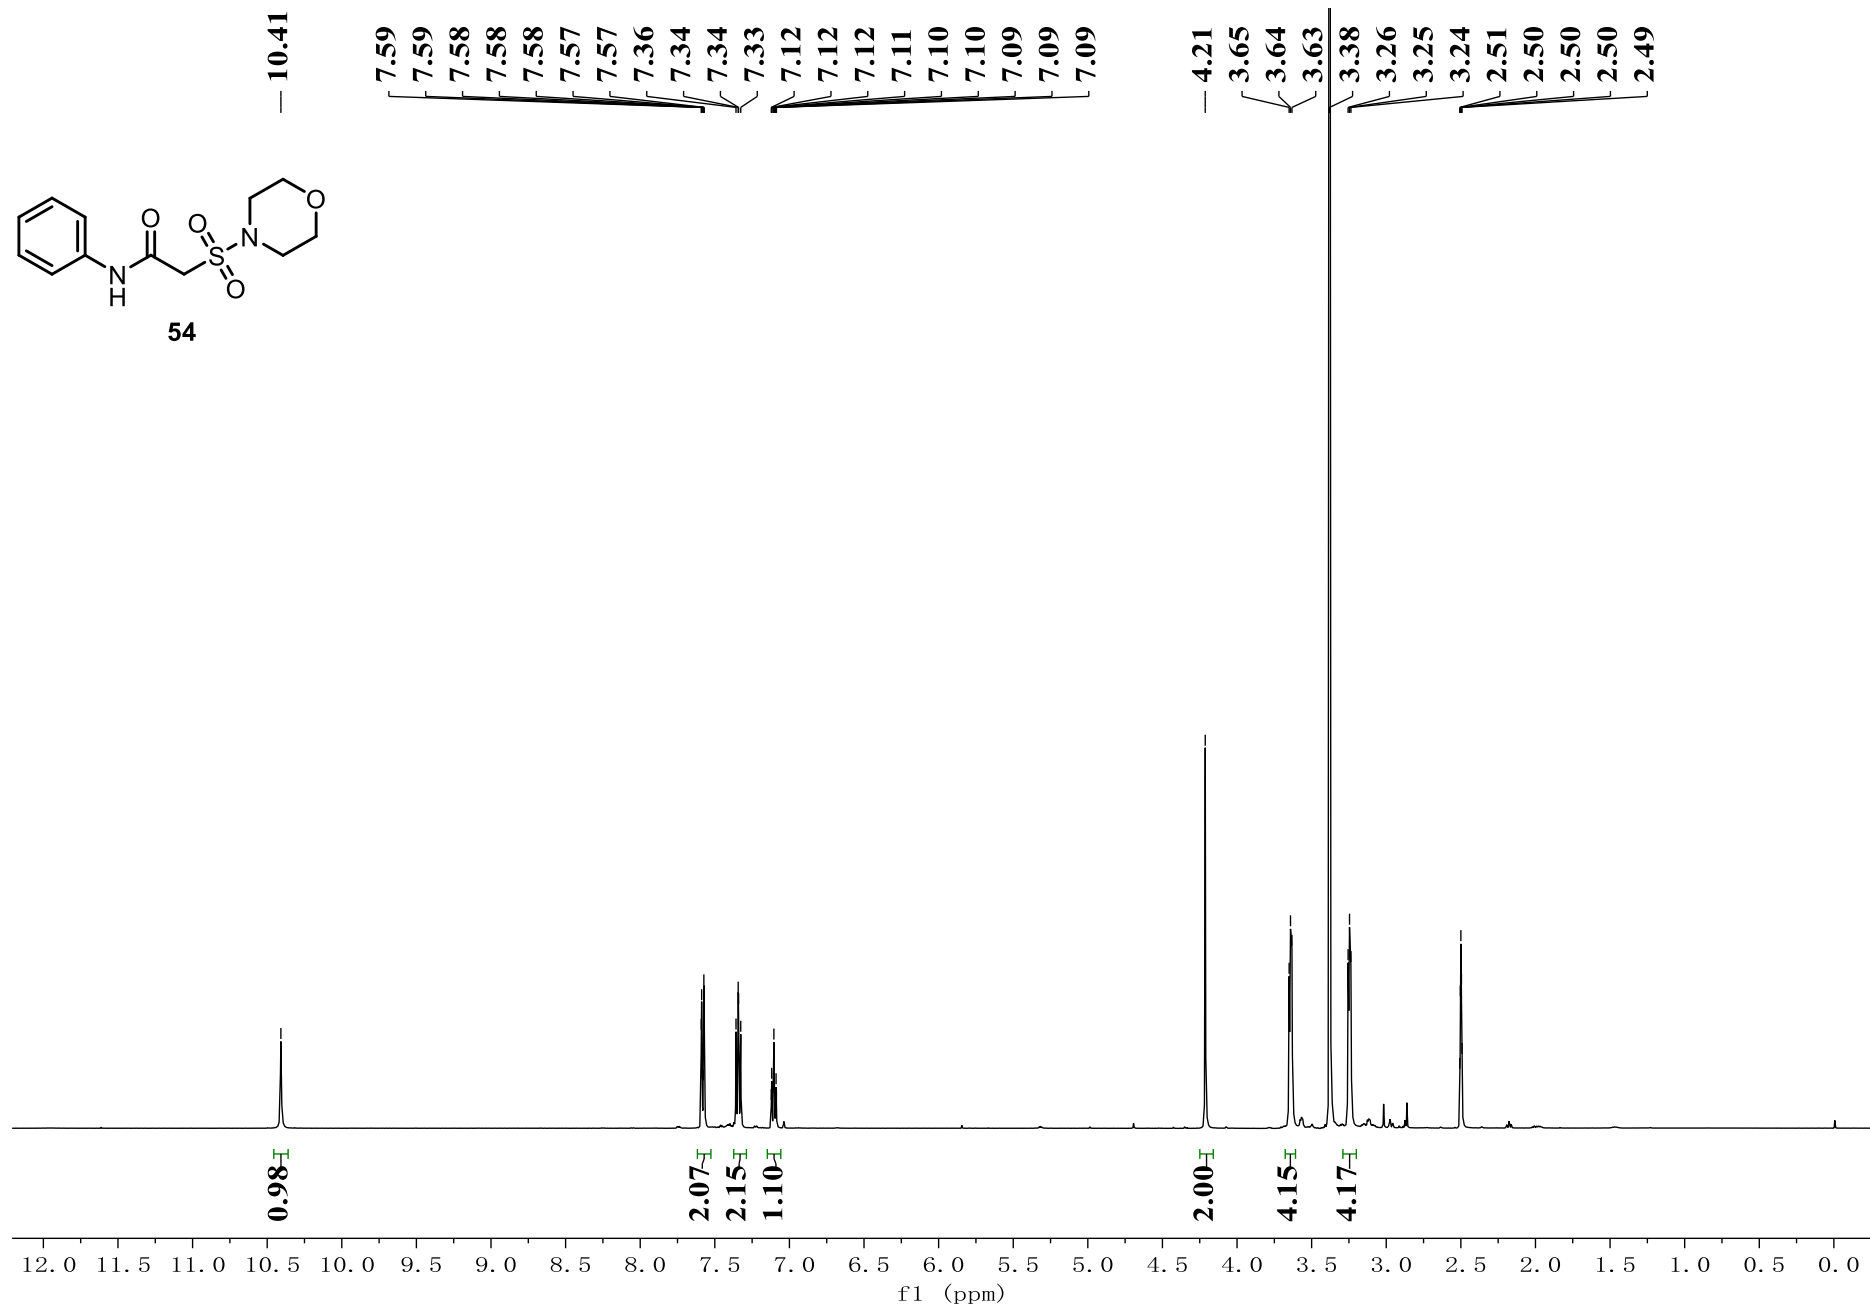

<sup>13</sup>C NMR (125 MHz, DMSO-*d*<sub>6</sub>) for 54

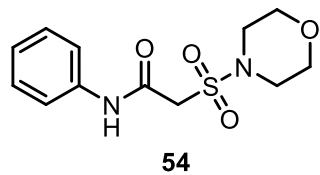

— 160.25  
— 65.89  
— 55.72  
— 45.74  
— 40.02  
— 39.85  
— 39.69  
— 39.52  
— 39.35  
— 39.19  
— 39.02

138.46  
128.99  
124.10  
119.26

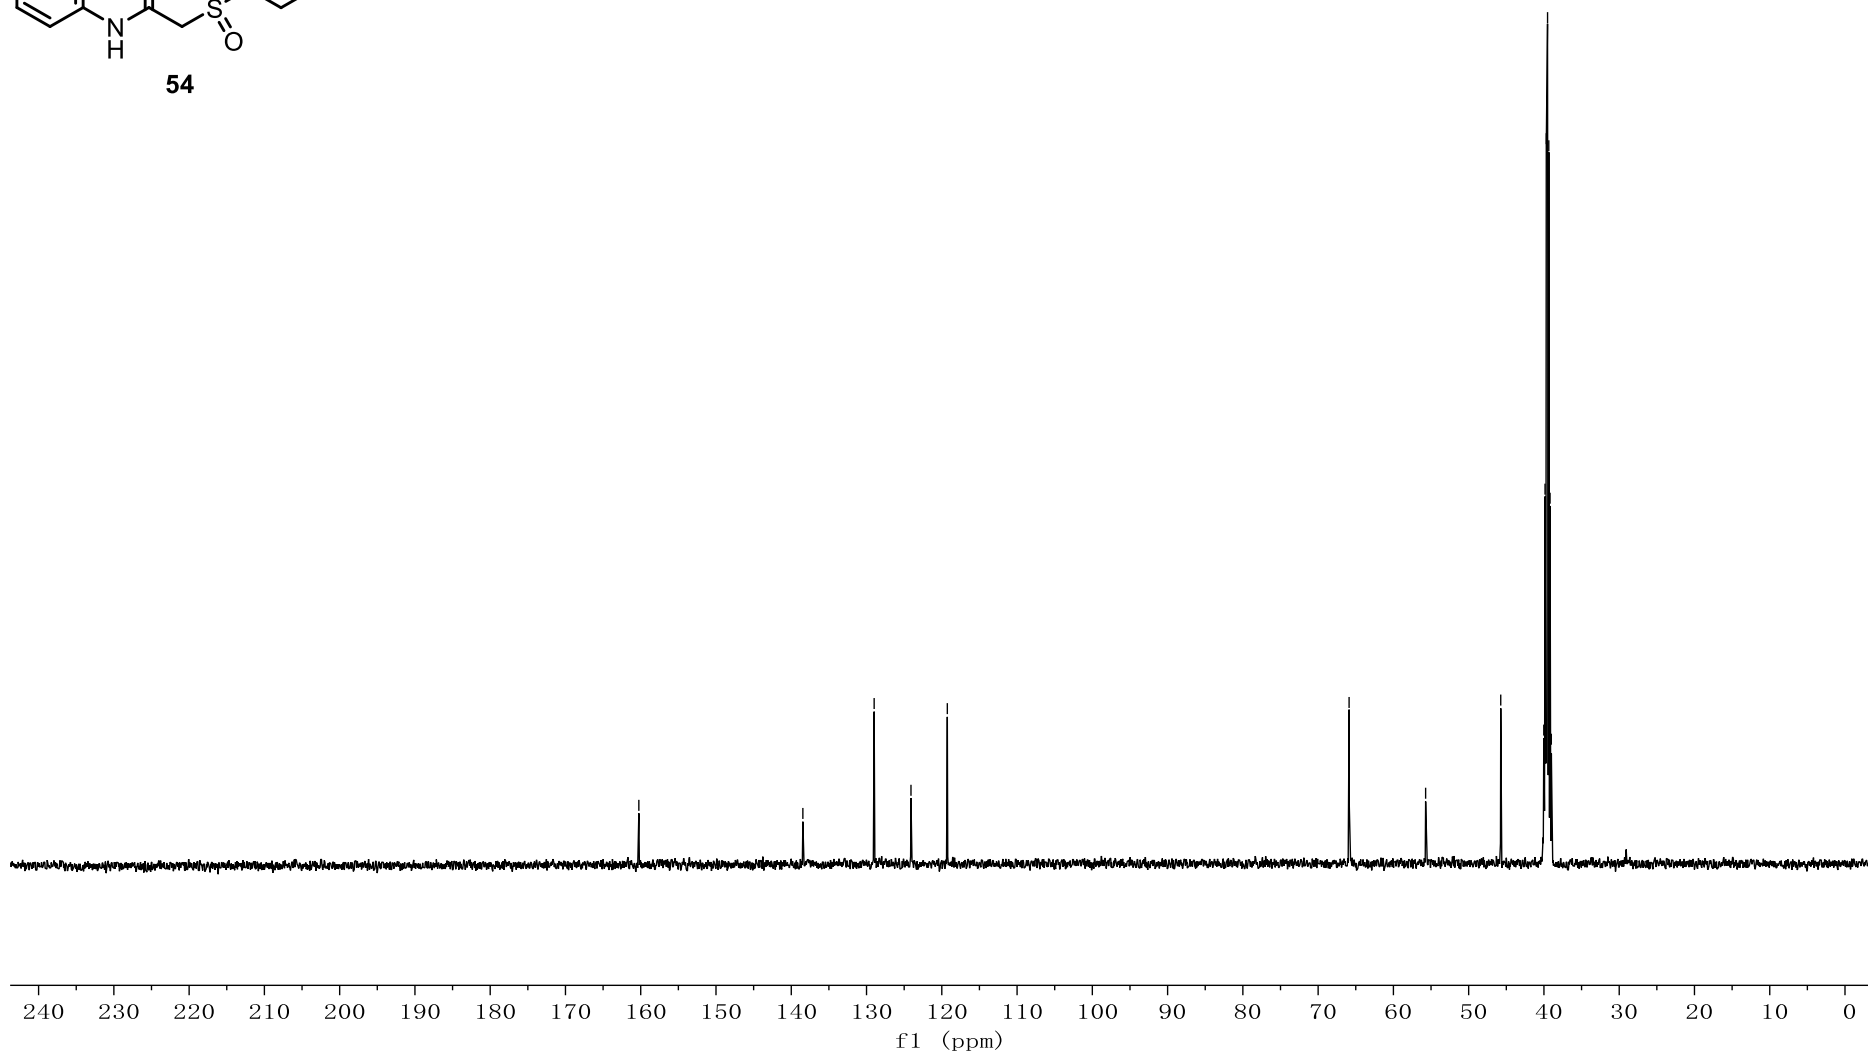

## 10. Reference.

- [1] Patil, D. V.; Lee, Y.; Kim, H. Y.; Oh, K. Visible-Light-Promoted Photoaddition of *N*-Nitrosopiperidines to Alkynes: Continuous Flow Chemistry Approach to Tetrahydroimidazo[1,2-*a*]Pyridine 1-Oxides. *Org. Lett.* **2022**, *24*, 5840.
- [2] Wu, Y.; Zhang, Y. L.; Yang, Z.; Jiao, J. C.; Zheng, X. K.; Feng, W. S.; Zhang, M. S.; Cheng, H.; Tang, L. Dual Roles of *tert*-Butyl Nitrite in the Transition Metal- and External Oxidant-Free Trifluoromethyloximation of Alkenes. *ChemSusChem.* **2019**, *12*, 3960
- [3] Guimond N.; Gorelsky S. I.; Fagnou K. Rhodium(III)-Catalyzed Heterocycle Synthesis Using an Internal Oxidant: Improved Reactivity and Mechanistic Studies. *J. Am. Chem. Soc.* **2011**, *133*, 6449.
- [4] De Luca, L.; Giacomelli, G.; Porcheddu, A. Beckmann Rearrangement of Oximes under Very Mild Conditions. *J. Org. Chem.* **2002**, *67*, 6272.
- [5] Hatchard, C. G.; Parker, C. A. *Proc. Roy. Soc. (London)* **1956**, *A235*, 518.
- [6] Kuhn, H. J.; Braslavsky, S. E.; Schmidt, R. Chemical actinometry (IUPAC Technical Report). *Pure Appl. Chem.* **2004**, *76*, 2105.
- [7] Monalti, M. *et. al.* Chemical Actinometry. *Handbook of Photochemistry*, 3rd Ed; Taylor & Francis Group, LLC. Boca Raton, FL, **2006**, 601.
